# Supplementary material for: Characterization and Diversity of Klebsiella pneumoniae Prophages
Source: MDPI journal article supplement (doi:10.3390/ijms24119116), 2023-05-23
Supplement: s1 [file s1]

**Table S6: Comparative overview of the GC content of the prophage and the chromosome or plasmid in which they were located.**

| Localization of<br>prophages | Average GC content (%) <sup>1</sup> |                 |              |              |             |                   |
|------------------------------|-------------------------------------|-----------------|--------------|--------------|-------------|-------------------|
|                              | Entero_P4                           | Escher_500465_1 | Salmon_SEN34 | Escher_RCS47 | Salmon_SJ46 | Escher_SH2026Stx1 |
| Chromosome                   | 58.5/53.7                           | 58.6/55.2       | 58.5/54.1    | 58.5/52.2    | NC          | NC                |
| Plasmid                      | NA                                  | NC              | NC           | 53.1/54.4    | 53.1/54.0   | 51.9/53.8         |

<sup>1</sup> The numbers in the table are the average GC content of chromosomes or plasmids/average GC content of prophages. NA, not available; NC, not compared.
