# Supplementary material for: Characterization and Diversity of Klebsiella pneumoniae Prophages
Source: MDPI journal article supplement (doi:10.3390/ijms24119116), 2023-05-23
Supplement: s1 [file s1]

Table S5: A comparative overview of the length and VF category and resistance mechanisms of prophages in chromosomes and plasmids.

| Localization<br>of prophages | Average length of<br>chromosomes or<br>plasmids with<br>different numbers<br>of prophages (Mb) |      |      | Average length of prophages with<br>different degrees of completeness (Kb) |              |            | Proportion of prophages with VF<br>or AMR genes (%) |       |       |        | Unique VF<br>category                                    | Main<br>resistance<br>mechanism                                   |
|------------------------------|------------------------------------------------------------------------------------------------|------|------|----------------------------------------------------------------------------|--------------|------------|-----------------------------------------------------|-------|-------|--------|----------------------------------------------------------|-------------------------------------------------------------------|
|                              | 0                                                                                              | 1    | >=2  | Intact                                                                     | Questionable | Incomplete | No                                                  | VF    | AMR   | VF+AMR |                                                          |                                                                   |
| Chromosome                   | -                                                                                              | 5.21 | 5.35 | 46.60                                                                      | 23.01        | 15.48      | 68.91                                               | 10.85 | 11.31 | 8.93   | antimicrobial<br>activity or<br>competitive<br>advantage | antibiotic<br>target<br>alteration<br>and<br>antibiotic<br>efflux |
| Plasmid                      | 0.01                                                                                           | 0.09 | 0.18 | 42.97                                                                      | 18.95        | 15.42      | 56.23                                               | 5.12  | 36.02 | 2.63   | exoenzyme<br>and invasion                                | antibiotic<br>inactivation                                        |
