# Supplementary material for: Characterization and Diversity of Klebsiella pneumoniae Prophages
Source: Int J Mol Sci. 2023 May 23;24(11):9116. doi: 10.3390/ijms24119116 (PMC10252525; doi:10.3390/ijms24119116)
Supplement: Supplementary file 1 [file ijms-24-09116-s001.zip]

Archive with 7 entries (7 files):
- ijms-2320228-supplementary.pdf
- Supplementary Table S1.tsv
- Supplementary Table S2.tsv
- Supplementary Table S3.tsv
- Supplementary Table S4.tsv
- Supplementary Table S5.pdf
- Supplementary Table S6.pdf
