# Supplementary material for: Characterization and Diversity of Klebsiella pneumoniae Prophages
Source: Int J Mol Sci. 2023 May 23;24(11):9116. doi: 10.3390/ijms24119116 (PMC10252525; doi:10.3390/ijms24119116)
Supplement: Supplementary file 1 [file ijms-24-09116-s001.zip › Supplementary Table S1.tsv]

Strain_RefSeq_Accn	Strain_Name	Prophage_Name	Prophage_Length	Prophage_Completeness
NZ_CP025515.1	002SK2	002SK2_chr_1	50.6Kb	intact
NZ_CP025515.1	002SK2	002SK2_chr_2	37.5Kb	intact
NZ_CP025515.1	002SK2	002SK2_chr_3	51.1Kb	intact
NZ_CP025515.1	002SK2	002SK2_chr_4	22.1Kb	intact
NZ_CP025515.1	002SK2	002SK2_chr_6	43.2Kb	intact
NZ_CP025517.1	002SK2	002SK2_pla_p002SK2_B_1	52.4Kb	intact
NZ_CP083075.1	113481141	0113481141_chr_2	40.2Kb	intact
NZ_CP083075.1	113481141	0113481141_chr_3	43Kb	intact
NZ_CP083075.1	113481141	0113481141_chr_4	55.7Kb	intact
NZ_CP083075.1	113481141	0113481141_chr_5	108.8Kb	intact
NZ_CP083075.1	113481141	0113481141_chr_6	53.6Kb	intact
NZ_CP033396.2	015625	015625_chr_4	75.1Kb	intact
NZ_CP033396.2	015625	015625_chr_7	56.8Kb	intact
NZ_CP033396.2	015625	015625_chr_10	40.3Kb	intact
NZ_CP033396.2	015625	015625_chr_11	66.4Kb	intact
NZ_CP033394.2	015625	015625_pla_pCTXM65_015625_2	37.3Kb	intact
NZ_CP083051.1	213293972	0213293972_chr_2	47.7Kb	intact
NZ_CP083051.1	213293972	0213293972_chr_3	55.1Kb	intact
NZ_CP083051.1	213293972	0213293972_chr_4	56.4Kb	intact
NZ_CP084873.1	03-9138-2	03-9138-2_chr_3	48.4Kb	intact
NZ_CP084871.1	04A025	04A025_chr_2	28.3Kb	intact
NZ_CP084871.1	04A025	04A025_chr_3	54.5Kb	intact
NZ_CP084871.1	04A025	04A025_chr_4	41.4Kb	intact
NZ_CP084871.1	04A025	04A025_chr_5	38.2Kb	intact
NZ_CP049719.1	06KM907	06KM907_chr_2	39.2Kb	intact
NZ_CP049719.1	06KM907	06KM907_chr_3	46.8Kb	intact
NZ_CP049719.1	06KM907	06KM907_chr_5	57.5Kb	intact
NZ_CP049719.1	06KM907	06KM907_chr_7	61.4Kb	intact
NZ_CP049719.1	06KM907	06KM907_chr_8	30.3Kb	intact
NZ_CP025576.1	08EU827	08EU827_chr_3	37Kb	intact
NZ_CP025576.1	08EU827	08EU827_chr_4	29.1Kb	intact
NZ_CP042321.1	1-16	1-16_chr_4	50.4Kb	intact
NZ_CP042321.1	1-16	1-16_chr_5	37.5Kb	intact
NZ_CP042321.1	1-16	1-16_chr_6	44.9Kb	intact
NZ_CP042311.1	101-17	101-17_chr_4	50.4Kb	intact
NZ_CP042311.1	101-17	101-17_chr_5	37.5Kb	intact
NZ_CP042311.1	101-17	101-17_chr_6	44.9Kb	intact
NZ_CP042311.1	101-17	101-17_chr_8	48.1Kb	intact
NZ_OW970374.1	101	1011_chr_main_3	46.7Kb	intact
NZ_OW970374.1	101	1011_chr_main_5	48Kb	intact
NZ_OW970374.1	101	1011_chr_main_6	40.2Kb	intact
NZ_OW970374.1	101	1011_chr_main_8	48.5Kb	intact
NZ_OW970444.1	101	1012_chr_main_3	46.7Kb	intact
NZ_OW970444.1	101	1012_chr_main_4	47.7Kb	intact
NZ_OW970444.1	101	1012_chr_main_5	40.2Kb	intact
NZ_OW970444.1	101	1012_chr_main_6	48.5Kb	intact
NZ_OW970446.1	101	1012_pla_P2_1	42.5Kb	intact
NZ_CP100312.1	1020	1020_chr_1	40.7Kb	intact
NZ_CP100312.1	1020	1020_chr_2	37.1Kb	intact
NZ_CP100312.1	1020	1020_chr_3	70.5Kb	intact
NZ_CP100313.1	1020	1020_pla_pKpQIL_1020_1	46.8Kb	intact
NZ_CP100308.1	1021	1021_chr_1	40.7Kb	intact
NZ_CP100308.1	1021	1021_chr_2	37.1Kb	intact
NZ_CP100308.1	1021	1021_chr_3	70.5Kb	intact
NZ_CP100309.1	1021	1021_pla_pKpQIL_1021_1	46.8Kb	intact
NZ_CP042310.1	103-17	103-17_chr_4	50.4Kb	intact
NZ_CP042310.1	103-17	103-17_chr_5	37.5Kb	intact
NZ_CP042310.1	103-17	103-17_chr_6	45Kb	intact
NZ_CP042310.1	103-17	103-17_chr_8	48.1Kb	intact
NZ_CP023416.1	1050	1050_chr_2	54.8Kb	intact
NZ_CP023416.1	1050	1050_chr_3	48.9Kb	intact
NZ_CP023416.1	1050	1050_chr_4	46.9Kb	intact
NZ_CP023416.1	1050	1050_chr_5	54.5Kb	intact
NZ_CP023417.1	1050	1050_pla_pKp1050-1_2	14.9Kb	intact
NZ_CP023421.1	1050	1050_pla_unnamed_1	51.8Kb	intact
NC_018522.1	1084	1084_chr_4	33.1Kb	intact
NZ_CP042309.1	109-17	109-17_chr_4	50.4Kb	intact
NZ_CP042309.1	109-17	109-17_chr_5	28.7Kb	intact
NZ_CP042309.1	109-17	109-17_chr_6	44.9Kb	intact
NZ_CP091813.1	10MC160002271	10MC160002271_chr_1	39.9Kb	intact
NZ_CP091813.1	10MC160002271	10MC160002271_chr_4	25.3Kb	intact
NZ_CP091813.1	10MC160002271	10MC160002271_chr_5	50.8Kb	intact
NZ_CP091813.1	10MC160002271	10MC160002271_chr_6	57.3Kb	intact
NZ_CP091813.1	10MC160002271	10MC160002271_chr_7	36.9Kb	intact
NZ_CP091814.1	10MC160002271	10MC160002271_pla_pFQ61_ST383_NDM-5_5	25.7Kb	intact
NZ_CP016923.1	11	111_chr_4	63.1Kb	intact
NZ_CP030174.1	11219	11219_chr_1	53.8Kb	intact
NZ_CP030174.1	11219	11219_chr_2	36.9Kb	intact
NZ_CP030174.1	11219	11219_chr_4	35.3Kb	intact
NZ_CP030174.1	11219	11219_chr_5	38.1Kb	intact
NZ_CP030174.1	11219	11219_chr_6	58.5Kb	intact
NZ_CP030174.1	11219	11219_chr_7	45.1Kb	intact
NZ_CP030174.1	11219	11219_chr_8	49.6Kb	intact
NZ_CP030174.1	11219	11219_chr_9	19.8Kb	intact
NZ_CP030174.1	11219	11219_chr_10	38.1Kb	intact
NZ_CP097223.1	11	112_chr_1	63Kb	intact
NZ_CP030315.1	11305	11305_chr_1	42.1Kb	intact
NZ_CP030315.1	11305	11305_chr_3	42.1Kb	intact
NZ_CP030315.1	11305	11305_chr_4	57.3Kb	intact
NZ_CP030315.1	11305	11305_chr_5	28.4Kb	intact
NZ_CP030313.1	11311	11311_chr_1	37.9Kb	intact
NZ_CP030313.1	11311	11311_chr_2	34.6Kb	intact
NZ_CP030314.1	11311	11311_pla_p11311-1_3	28.8Kb	intact
NZ_CP026023.1	11420	11420_chr_2	49.2Kb	intact
NZ_CP026023.1	11420	11420_chr_3	51.3Kb	intact
NZ_CP026023.1	11420	11420_chr_6	34.6Kb	intact
NZ_CP026025.1	11420	11420_pla_p11420-KPC_1	42Kb	intact
NZ_CP030311.1	11454	11454_chr_5	37.3Kb	intact
NZ_CP026021.1	11492	11492_chr_1	52.9Kb	intact
NZ_CP026021.1	11492	11492_chr_2	47.3Kb	intact
NZ_CP026021.1	11492	11492_chr_5	34.2Kb	intact
NZ_CP103654.1	1159	1159_chr_4	54.1Kb	intact
NZ_CP103654.1	1159	1159_chr_5	40.5Kb	intact
NZ_CP103654.1	1159	1159_chr_6	31.4Kb	intact
NZ_CP103655.1	1159	1159_pla_pMB5730_1_2	34.3Kb	intact
NZ_CP089427.1	1194	1194_chr_3	57.5Kb	intact
NZ_CP089427.1	1194	1194_chr_4	35.8Kb	intact
NZ_CP049716.1	11KM256	11KM256_chr_2	39.2Kb	intact
NZ_CP049716.1	11KM256	11KM256_chr_3	46.8Kb	intact
NZ_CP049716.1	11KM256	11KM256_chr_5	57.5Kb	intact
NZ_CP049716.1	11KM256	11KM256_chr_7	61.4Kb	intact
NZ_CP049716.1	11KM256	11KM256_chr_8	30.3Kb	intact
NZ_CP031849.1	121	121_chr_4	41.8Kb	intact
NZ_CP031849.1	121	121_chr_6	53.8Kb	intact
NZ_CP031849.1	121	121_chr_7	30.2Kb	intact
NZ_CP031849.1	121	121_chr_9	34.9Kb	intact
NZ_CP030172.1	12208	12208_chr_1	50.1Kb	intact
NZ_CP083070.1	1230_0791_KP	1230_0791_KP_chr_1	42.1Kb	intact
NZ_CP083070.1	1230_0791_KP	1230_0791_KP_chr_2	48.1Kb	intact
NZ_CP083070.1	1230_0791_KP	1230_0791_KP_chr_3	57.3Kb	intact
NZ_CP083072.1	1230_0791_KP	1230_0791_KP_pla_p2-1230_0791_KP_2	35.4Kb	intact
NZ_CP097220.1	12	12er_chr_1	63.1Kb	intact
NZ_CP082765.1	12	12yi_chr_3	61.3Kb	intact
NZ_CP082765.1	12	12yi_chr_4	53.9Kb	intact
NZ_CP082765.1	12	12yi_chr_6	56.9Kb	intact
NZ_CP082765.1	12	12yi_chr_10	66.9Kb	intact
NZ_CP082765.1	12	12yi_chr_11	37.5Kb	intact
NZ_CP082766.1	12	12yi_pla_pKP12-vir_1	18.3Kb	intact
NZ_CP098355.1	13001	13001_chr_2	49.3Kb	intact
NZ_CP098355.1	13001	13001_chr_3	48.8Kb	intact
NZ_CP098355.1	13001	13001_chr_5	56.9Kb	intact
NZ_CP098355.1	13001	13001_chr_7	60.3Kb	intact
NZ_CP098355.1	13001	13001_chr_8	37.5Kb	intact
NZ_CP098355.1	13001	13001_chr_9	50.9Kb	intact
NZ_CP098357.1	13001	13001_pla_p13001-KPN_2	21.6Kb	intact
NZ_CP098358.1	13001	13001_pla_p13001-QIL_1	38.7Kb	intact
NZ_CP026017.1	13190	13190_chr_1	40.2Kb	intact
NZ_CP026017.1	13190	13190_chr_2	57.3Kb	intact
NZ_CP026019.1	13190	13190_pla_p13190-1_3	35.7Kb	intact
NZ_CP097626.1	140253	140253_chr_3	61.3Kb	intact
NZ_CP097626.1	140253	140253_chr_4	54.6Kb	intact
NZ_CP097626.1	140253	140253_chr_6	56.8Kb	intact
NZ_CP097626.1	140253	140253_chr_9	40.3Kb	intact
NZ_CP097626.1	140253	140253_chr_11	37.1Kb	intact
NZ_CP097626.1	140253	140253_chr_12	31.5Kb	intact
NZ_CP097627.1	140253	140253_pla_pKPC2_140253_3	26.1Kb	intact
NZ_OW970514.1	147	14710_chr_main_1	40.2Kb	intact
NZ_OW970514.1	147	14710_chr_main_3	38.2Kb	intact
NZ_OW970514.1	147	14710_chr_main_4	47Kb	intact
NZ_OW970516.1	147	14710_pla_P2_1	52.8Kb	intact
NZ_OW970517.1	147	14710_pla_P3_1	40.8Kb	intact
NZ_OW970530.1	147	14711_chr_main_1	40.2Kb	intact
NZ_OW970530.1	147	14711_chr_main_2	38.2Kb	intact
NZ_OW970530.1	147	14711_chr_main_3	47Kb	intact
NZ_OW970533.1	147	14711_pla_P3_1	53.2Kb	intact
NZ_OW970540.1	147	14712_chr_main_1	40.2Kb	intact
NZ_OW970540.1	147	14712_chr_main_3	38Kb	intact
NZ_OW970540.1	147	14712_chr_main_4	47Kb	intact
NZ_OW970544.1	147	14712_pla_P4_1	52.9Kb	intact
NZ_OW970553.1	147	14713_chr_main_1	40.2Kb	intact
NZ_OW970553.1	147	14713_chr_main_2	38Kb	intact
NZ_OW970553.1	147	14713_chr_main_3	47.7Kb	intact
NZ_OW970555.1	147	14713_pla_P2_1	32.7Kb	intact
NZ_OW970557.1	147	14713_pla_P4_1	50.8Kb	intact
NZ_OW970560.1	147	14714_chr_main_1	42.2Kb	intact
NZ_OW970560.1	147	14714_chr_main_2	38Kb	intact
NZ_OW970560.1	147	14714_chr_main_3	47Kb	intact
NZ_OW970564.1	147	14714_pla_P4_1	49.9Kb	intact
NZ_OW970357.1	147	1471_chr_main_1	40.2Kb	intact
NZ_OW970357.1	147	1471_chr_main_3	38Kb	intact
NZ_OW970357.1	147	1471_chr_main_4	47Kb	intact
NZ_OW970361.1	147	1471_pla_P4_1	52.9Kb	intact
NZ_OW970365.1	147	1472_chr_main_1	40.2Kb	intact
NZ_OW970365.1	147	1472_chr_main_2	38Kb	intact
NZ_OW970365.1	147	1472_chr_main_3	47Kb	intact
NZ_OW970369.1	147	1472_pla_P4_1	52.4Kb	intact
NZ_OW970413.1	147	1473_chr_main_1	40.2Kb	intact
NZ_OW970413.1	147	1473_chr_main_3	38Kb	intact
NZ_OW970413.1	147	1473_chr_main_4	47Kb	intact
NZ_OW970415.1	147	1473_pla_P2_2	29.9Kb	intact
NZ_OW970417.1	147	1473_pla_P4_1	42Kb	intact
NZ_OW970422.1	147	1474_chr_main_1	40.2Kb	intact
NZ_OW970422.1	147	1474_chr_main_3	38.2Kb	intact
NZ_OW970422.1	147	1474_chr_main_4	47Kb	intact
NZ_OW970425.1	147	1474_pla_P3_1	53.6Kb	intact
NZ_OW970436.1	147	1475_chr_main_1	42.2Kb	intact
NZ_OW970436.1	147	1475_chr_main_2	38.2Kb	intact
NZ_OW970436.1	147	1475_chr_main_3	47Kb	intact
NZ_OW970438.1	147	1475_pla_P2_2	27.5Kb	intact
NZ_OW970440.1	147	1475_pla_P4_1	41.2Kb	intact
NZ_OW970452.1	147	1476_chr_main_1	40.2Kb	intact
NZ_OW970452.1	147	1476_chr_main_2	38Kb	intact
NZ_OW970452.1	147	1476_chr_main_3	47Kb	intact
NZ_OW970456.1	147	1476_pla_P4_1	52.8Kb	intact
NZ_OW970478.1	147	1477_chr_main_1	40.2Kb	intact
NZ_OW970478.1	147	1477_chr_main_2	38Kb	intact
NZ_OW970478.1	147	1477_chr_main_3	47Kb	intact
NZ_OW970480.1	147	1477_pla_P2_1	52.8Kb	intact
NZ_OW970481.1	147	1477_pla_P3_1	44.8Kb	intact
NZ_OW970486.1	147	1478_chr_main_1	40.2Kb	intact
NZ_OW970486.1	147	1478_chr_main_2	38.2Kb	intact
NZ_OW970486.1	147	1478_chr_main_3	47Kb	intact
NZ_OW970486.1	147	1478_chr_main_5	55.4Kb	intact
NZ_OW970489.1	147	1478_pla_P3_1	52.9Kb	intact
NZ_OW970492.1	147	1479_chr_main_1	40.2Kb	intact
NZ_OW970492.1	147	1479_chr_main_3	38Kb	intact
NZ_OW970492.1	147	1479_chr_main_4	47Kb	intact
NZ_OW970494.1	147	1479_pla_P2_1	35.5Kb	intact
NZ_OW970496.1	147	1479_pla_P4_1	54.5Kb	intact
NZ_CP103582.1	1498	1498_chr_2	73Kb	intact
NZ_CP103582.1	1498	1498_chr_3	29.6Kb	intact
NZ_CP103582.1	1498	1498_chr_4	67.1Kb	intact
NZ_CP103583.1	1498	1498_pla_pMB7868_1_1	46.4Kb	intact
NZ_CP103584.1	1498	1498_pla_pMB7868_2_1	109.2Kb	intact
NZ_CP104030.1	150040X0B1	150040X0B1_chr_4	61.3Kb	intact
NZ_CP104030.1	150040X0B1	150040X0B1_chr_5	53.9Kb	intact
NZ_CP104030.1	150040X0B1	150040X0B1_chr_7	56.8Kb	intact
NZ_CP104030.1	150040X0B1	150040X0B1_chr_9	40.3Kb	intact
NZ_CP104030.1	150040X0B1	150040X0B1_chr_10	37.1Kb	intact
NZ_CP104030.1	150040X0B1	150040X0B1_chr_11	31.5Kb	intact
NZ_CP104031.1	150040X0B1	150040X0B1_pla_pCTXM65_150040X0B1_2	48.9Kb	intact
NZ_CP101726.1	150040X1B1	150040X1B1_chr_4	61.3Kb	intact
NZ_CP101726.1	150040X1B1	150040X1B1_chr_5	53.9Kb	intact
NZ_CP101726.1	150040X1B1	150040X1B1_chr_8	56.8Kb	intact
NZ_CP101726.1	150040X1B1	150040X1B1_chr_10	40.3Kb	intact
NZ_CP101726.1	150040X1B1	150040X1B1_chr_11	37.1Kb	intact
NZ_CP101726.1	150040X1B1	150040X1B1_chr_12	31.5Kb	intact
NZ_CP047648.1	156070	156070_chr_2	61.3Kb	intact
NZ_CP047648.1	156070	156070_chr_4	38.7Kb	intact
NZ_CP047648.1	156070	156070_chr_6	40.3Kb	intact
NZ_CP047648.1	156070	156070_chr_7	45.1Kb	intact
NZ_CP047648.1	156070	156070_chr_8	53.9Kb	intact
NZ_CP047648.1	156070	156070_chr_10	33.1Kb	intact
NZ_CP047649.1	158590	158590_chr_2	61.3Kb	intact
NZ_CP047649.1	158590	158590_chr_3	33.1Kb	intact
NZ_CP047649.1	158590	158590_chr_5	49.5Kb	intact
NZ_CP047649.1	158590	158590_chr_6	56.8Kb	intact
NZ_CP047649.1	158590	158590_chr_8	40.3Kb	intact
NZ_CP047649.1	158590	158590_chr_10	38.7Kb	intact
NZ_CP029689.1	160111	160111_chr_2	55.1Kb	intact
NZ_CP029689.1	160111	160111_chr_3	51Kb	intact
NZ_CP029689.1	160111	160111_chr_7	37.5Kb	intact
NZ_CP029689.1	160111	160111_chr_9	40.3Kb	intact
NZ_CP029689.1	160111	160111_chr_11	45.1Kb	intact
NZ_CP030133.1	160111	160111_pla_pIncFII_L111_1	39.1Kb	intact
NZ_CP030134.1	160111	160111_pla_pKPC2_L111_1	14.1Kb	intact
NZ_CP083066.1	1613015451	1613015451_chr_2	37.2Kb	intact
NZ_CP083066.1	1613015451	1613015451_chr_3	63.5Kb	intact
NZ_CP083066.1	1613015451	1613015451_chr_7	44.3Kb	intact
NZ_CP083066.1	1613015451	1613015451_chr_8	37.3Kb	intact
NZ_CP083066.1	1613015451	1613015451_chr_9	36.9Kb	intact
NZ_CP083067.1	1613015451	1613015451_pla_p1-1613015451_1	8.1Kb	intact
NZ_CP083067.1	1613015451	1613015451_pla_p1-1613015451_2	13.6Kb	intact
NZ_CP083063.1	1613163991	1613163991_chr_1	38.6Kb	intact
NZ_CP083063.1	1613163991	1613163991_chr_5	37.4Kb	intact
NZ_CP083063.1	1613163991	1613163991_chr_6	48.9Kb	intact
NZ_CP083055.1	1613258639	1613258639_chr_4	45.7Kb	intact
NZ_CP083056.1	1613258639	1613258639_pla_p1-1613258639_4	79.9Kb	intact
NZ_CP084497.1	1632	1632_chr_2	61.3Kb	intact
NZ_CP084497.1	1632	1632_chr_3	53.9Kb	intact
NZ_CP084497.1	1632	1632_chr_5	50.3Kb	intact
NZ_CP084497.1	1632	1632_chr_6	58.7Kb	intact
NZ_CP084497.1	1632	1632_chr_9	40.3Kb	intact
NZ_CP084497.1	1632	1632_chr_10	39.4Kb	intact
NZ_CP084498.1	1632	1632_pla_p1632-1_2	44.8Kb	intact
NZ_CP051161.1	16BU137	16BU137_chr_3	65.7Kb	intact
NZ_CP051161.1	16BU137	16BU137_chr_4	37.1Kb	intact
NZ_CP051161.1	16BU137	16BU137_chr_5	33.5Kb	intact
NZ_CP051161.1	16BU137	16BU137_chr_6	35.5Kb	intact
NZ_CP045263.1	16HN-263	16HN-263_chr_2	61.3Kb	intact
NZ_CP045263.1	16HN-263	16HN-263_chr_3	36.3Kb	intact
NZ_CP045263.1	16HN-263	16HN-263_chr_4	44.3Kb	intact
NZ_CP045263.1	16HN-263	16HN-263_chr_6	56.8Kb	intact
NZ_CP045263.1	16HN-263	16HN-263_chr_9	40.3Kb	intact
NZ_CP045263.1	16HN-263	16HN-263_chr_10	37.5Kb	intact
NZ_CP045264.1	16HN-263	16HN-263_pla_p16HN-263_KPC_2	18.6Kb	intact
NZ_CP045264.1	16HN-263	16HN-263_pla_p16HN-263_KPC_4	18.4Kb	intact
NZ_CP027036.1	16_GR_13	16_GR_13_chr_4	49.1Kb	intact
NZ_CP027036.1	16_GR_13	16_GR_13_chr_5	36.1Kb	intact
NZ_CP027036.1	16_GR_13	16_GR_13_chr_6	43.7Kb	intact
NZ_CP019219.1	1756	1756_chr_1	21.8Kb	intact
NZ_CP019219.1	1756	1756_chr_2	44.5Kb	intact
NZ_CP019219.1	1756	1756_chr_3	27.4Kb	intact
NZ_CP041927.1	18-2374	18-2374_chr_1	36Kb	intact
NZ_CP041927.1	18-2374	18-2374_chr_3	48.9Kb	intact
NZ_CP041927.1	18-2374	18-2374_chr_4	38.3Kb	intact
NZ_CP041927.1	18-2374	18-2374_chr_5	52.9Kb	intact
NZ_CP041927.1	18-2374	18-2374_chr_6	48.8Kb	intact
NZ_CP041929.1	18-2374	18-2374_pla_pSECR18-2374B_1	107.1Kb	intact
NZ_CP084492.1	1864	1864_chr_3	61.3Kb	intact
NZ_CP084492.1	1864	1864_chr_4	49.4Kb	intact
NZ_CP084492.1	1864	1864_chr_6	56.8Kb	intact
NZ_CP084492.1	1864	1864_chr_9	40.3Kb	intact
NZ_CP084492.1	1864	1864_chr_10	37.5Kb	intact
NZ_CP084494.1	1864	1864_pla_p1864-2_2	19Kb	intact
NZ_CP034778.1	18CPO060	18CPO060_chr_3	38Kb	intact
NZ_CP034778.1	18CPO060	18CPO060_chr_4	55.6Kb	intact
NZ_CP039936.1	18KM1950	18KM1950_chr_3	53.3Kb	intact
NZ_CP039936.1	18KM1950	18KM1950_chr_4	57.5Kb	intact
NZ_CP039936.1	18KM1950	18KM1950_chr_6	61.4Kb	intact
NZ_CP039936.1	18KM1950	18KM1950_chr_7	30.2Kb	intact
NZ_CP039951.1	18KM2445b	18KM2445b_chr_1	42.4Kb	intact
NZ_CP039951.1	18KM2445b	18KM2445b_chr_5	39.5Kb	intact
NZ_CP039951.1	18KM2445b	18KM2445b_chr_6	57.6Kb	intact
NZ_CP039952.1	18KM2445b	18KM2445b_pla_pMBR_CTX-M-15_18KM2445b_1	29.8Kb	intact
NZ_CP039939.1	18KM2517	18KM2517_chr_3	53.4Kb	intact
NZ_CP039939.1	18KM2517	18KM2517_chr_4	57.5Kb	intact
NZ_CP039939.1	18KM2517	18KM2517_chr_6	61.4Kb	intact
NZ_CP039939.1	18KM2517	18KM2517_chr_7	30.2Kb	intact
NZ_CP039942.1	18KM2813	18KM2813_chr_3	53.4Kb	intact
NZ_CP039942.1	18KM2813	18KM2813_chr_4	57.5Kb	intact
NZ_CP039942.1	18KM2813	18KM2813_chr_6	61.4Kb	intact
NZ_CP039942.1	18KM2813	18KM2813_chr_7	30.2Kb	intact
NZ_CP022023.1	19051	19051_chr_1	36.4Kb	intact
NZ_CP022023.1	19051	19051_chr_3	44.4Kb	intact
NZ_CP064174.1	19110124	19110124_chr_1	28Kb	intact
NZ_CP064174.1	19110124	19110124_chr_5	38.4Kb	intact
NZ_CP064174.1	19110124	19110124_chr_6	61Kb	intact
NZ_CP064174.1	19110124	19110124_chr_8	47.3Kb	intact
NZ_CP064179.1	19110124	19110124_pla_p19110124-2_1	37.2Kb	intact
NZ_CP103729.1	197	197_chr_4	27.8Kb	intact
NZ_CP103729.1	197	197_chr_6	61.1Kb	intact
NZ_CP103729.1	197	197_chr_7	39.6Kb	intact
NZ_CP103729.1	197	197_chr_8	48.5Kb	intact
NZ_CP103730.1	197	197_pla_pMB2966_1_1	29Kb	intact
NZ_CP049950.1	19KM1053	19KM1053_chr_3	53.4Kb	intact
NZ_CP049950.1	19KM1053	19KM1053_chr_4	57.5Kb	intact
NZ_CP049950.1	19KM1053	19KM1053_chr_6	61.4Kb	intact
NZ_CP049950.1	19KM1053	19KM1053_chr_7	30.2Kb	intact
NZ_CP049953.1	19KM1109	19KM1109_chr_3	53.4Kb	intact
NZ_CP049953.1	19KM1109	19KM1109_chr_5	57.5Kb	intact
NZ_CP049953.1	19KM1109	19KM1109_chr_7	61.4Kb	intact
NZ_CP049953.1	19KM1109	19KM1109_chr_8	30.2Kb	intact
NZ_CP049947.1	19KM267	19KM267_chr_3	53.3Kb	intact
NZ_CP049947.1	19KM267	19KM267_chr_4	57.5Kb	intact
NZ_CP049947.1	19KM267	19KM267_chr_6	61.4Kb	intact
NZ_CP049947.1	19KM267	19KM267_chr_7	30.2Kb	intact
NZ_CP039945.1	19KM28	19KM28_chr_3	53.4Kb	intact
NZ_CP039945.1	19KM28	19KM28_chr_4	57.5Kb	intact
NZ_CP039945.1	19KM28	19KM28_chr_6	61.4Kb	intact
NZ_CP039945.1	19KM28	19KM28_chr_7	30.2Kb	intact
NZ_CP039948.1	19KM57	19KM57_chr_3	53.4Kb	intact
NZ_CP039948.1	19KM57	19KM57_chr_4	57.5Kb	intact
NZ_CP039948.1	19KM57	19KM57_chr_6	61.4Kb	intact
NZ_CP039948.1	19KM57	19KM57_chr_7	30.2Kb	intact
NZ_CP051159.1	19PDR22	19PDR22_chr_1	76.2Kb	intact
NZ_CP051159.1	19PDR22	19PDR22_chr_2	60.4Kb	intact
NZ_CP051159.1	19PDR22	19PDR22_chr_4	53.9Kb	intact
NZ_CP051159.1	19PDR22	19PDR22_chr_5	69.5Kb	intact
NZ_CP051159.1	19PDR22	19PDR22_chr_11	40.6Kb	intact
NZ_CP076549.1	19PDR22	19PDR22_pla_p5_1	35Kb	intact
NZ_CP097237.1	1	1_chr_4	63.1Kb	intact
NZ_CP027042.1	1_GR_13	1_GR_13_chr_1	40.2Kb	intact
NZ_CP027042.1	1_GR_13	1_GR_13_chr_3	26.6Kb	intact
NZ_CP027043.1	1_GR_13	1_GR_13_pla_IncAC2_2	24Kb	intact
NZ_CP027045.1	1_GR_13	1_GR_13_pla_IncFIB_1	108Kb	intact
NZ_CP027047.1	1_GR_13	1_GR_13_pla_IncR_IncN_1	26.9Kb	intact
NZ_CP027046.1	1_GR_13	1_GR_13_pla_unnamed_1	48.7Kb	intact
NZ_CP031562.1	2-1	2-1_chr_2	75Kb	intact
NZ_CP031563.1	2-1	2-1_pla_pKP21HI1_2	20.7Kb	intact
NZ_CP031563.1	2-1	2-1_pla_pKP21HI1_3	14.9Kb	intact
NZ_CP055293.1	200	200_chr_3	72.4Kb	intact
NZ_CP065034.1	2016-1400	2016-1400_chr_2	30.8Kb	intact
NZ_CP065034.1	2016-1400	2016-1400_chr_3	33.9Kb	intact
NZ_CP068015.1	2016_49	2016_49_chr_1	49.3Kb	intact
NZ_CP068015.1	2016_49	2016_49_chr_2	52.2Kb	intact
NZ_CP068015.1	2016_49	2016_49_chr_4	55.7Kb	intact
NZ_CP068015.1	2016_49	2016_49_chr_5	47Kb	intact
NZ_CP068015.1	2016_49	2016_49_chr_6	34.6Kb	intact
NZ_CP068015.1	2016_49	2016_49_chr_7	21.3Kb	intact
NZ_CP068016.1	2016_49	2016_49_pla_pMS3802-CTXM-vir_1	23.7Kb	intact
NZ_CP044368.1	2018C01-046	2018C01-046_chr_1	14Kb	intact
NZ_CP044368.1	2018C01-046	2018C01-046_chr_2	37.3Kb	intact
NZ_CP044368.1	2018C01-046	2018C01-046_chr_4	36.7Kb	intact
NZ_CP044368.1	2018C01-046	2018C01-046_chr_5	42.4Kb	intact
NZ_CP044368.1	2018C01-046	2018C01-046_chr_6	38Kb	intact
NZ_CP044370.1	2018C01-046	2018C01-046_pla_p2018C01-046-2_1	96.3Kb	intact
NZ_CP044371.1	2018C01-046	2018C01-046_pla_p2018C01-046-3_1	29Kb	intact
NZ_CP044385.1	2018C01-239	2018C01-239_chr_3	40.8Kb	intact
NZ_CP044385.1	2018C01-239	2018C01-239_chr_5	38.8Kb	intact
NZ_CP044386.1	2018C01-239	2018C01-239_pla_p2018C01-239-1_MCR1_5	31.3Kb	intact
NZ_CP044393.1	2018N16-148	2018N16-148_chr_2	39.2Kb	intact
NZ_CP044393.1	2018N16-148	2018N16-148_chr_3	50.2Kb	intact
NZ_CP044393.1	2018N16-148	2018N16-148_chr_4	12.7Kb	intact
NZ_CP044389.1	2018N17-066	2018N17-066_chr_3	52.1Kb	intact
NZ_CP044389.1	2018N17-066	2018N17-066_chr_4	46.6Kb	intact
NZ_CP044376.1	2018S06-082	2018S06-082_chr_8	38.3Kb	intact
NZ_CP044380.1	2018S07-013	2018S07-013_chr_2	36.9Kb	intact
NZ_CP044380.1	2018S07-013	2018S07-013_chr_3	38.2Kb	intact
NZ_CP047336.1	2019036D	2019036D_chr_2	30.3Kb	intact
NZ_CP047336.1	2019036D	2019036D_chr_3	60Kb	intact
NZ_CP047338.1	2019036D	2019036D_pla_p2019036D-50kb_1	30.9Kb	intact
NZ_CP047337.1	2019036D	2019036D_pla_p2019036D-mcr8-345kb_4	37.2Kb	intact
NZ_CP104659.1	2020CK-00096	2020CK-00096_chr_1	24Kb	intact
NZ_CP104659.1	2020CK-00096	2020CK-00096_chr_2	40.5Kb	intact
NZ_CP104659.1	2020CK-00096	2020CK-00096_chr_3	54.2Kb	intact
NZ_CP104659.1	2020CK-00096	2020CK-00096_chr_4	21.3Kb	intact
NZ_CP104678.1	2021CK-00608	2021CK-00608_chr_1	46.4Kb	intact
NZ_CP104678.1	2021CK-00608	2021CK-00608_chr_2	40.8Kb	intact
NZ_CP104678.1	2021CK-00608	2021CK-00608_chr_4	38.6Kb	intact
NZ_CP104678.1	2021CK-00608	2021CK-00608_chr_5	62.4Kb	intact
NZ_CP104679.1	2021CK-00608	2021CK-00608_pla_unnamed1_1	14.1Kb	intact
NZ_CP104679.1	2021CK-00608	2021CK-00608_pla_unnamed1_3	12.6Kb	intact
NZ_CP104679.1	2021CK-00608	2021CK-00608_pla_unnamed1_5	41.9Kb	intact
NZ_CP104680.1	2021CK-00608	2021CK-00608_pla_unnamed2_1	38.8Kb	intact
NZ_CP104660.1	2021CK-01729	2021CK-01729_chr_3	48.8Kb	intact
NZ_CP104660.1	2021CK-01729	2021CK-01729_chr_4	44.2Kb	intact
NZ_CP104662.1	2021CK-01729	2021CK-01729_pla_unnamed2_1	22.2Kb	intact
NZ_CP104373.1	2021CK-01815	2021CK-01815_chr_3	48.8Kb	intact
NZ_CP104373.1	2021CK-01815	2021CK-01815_chr_4	44.2Kb	intact
NZ_CP104374.1	2021CK-01815	2021CK-01815_pla_unnamed1_1	38.8Kb	intact
NZ_CP021165.1	203	203_chr_4	54.3Kb	intact
NZ_CP021165.1	203	203_chr_5	45.6Kb	intact
NZ_CP021166.1	203	203_pla_p203_1	44.5Kb	intact
NZ_CP030302.1	205880	205880_chr_3	52.1Kb	intact
NZ_CP030305.1	205880	205880_pla_p205880-3_1	35.8Kb	intact
NZ_CP030306.1	205880	205880_pla_p205880-4_1	107.8Kb	intact
NZ_CP027048.1	20_GR_12	20_GR_12_chr_3	45.1Kb	intact
NZ_CP027048.1	20_GR_12	20_GR_12_chr_5	56.9Kb	intact
NZ_CP027048.1	20_GR_12	20_GR_12_chr_6	69.4Kb	intact
NZ_CP027048.1	20_GR_12	20_GR_12_chr_7	37.5Kb	intact
NZ_CP095234.1	21072329	21072329_chr_3	33.2Kb	intact
NZ_CP095234.1	21072329	21072329_chr_4	31.1Kb	intact
NZ_CP095234.1	21072329	21072329_chr_10	51.1Kb	intact
NZ_CP095234.1	21072329	21072329_chr_11	53.9Kb	intact
NZ_CP095234.1	21072329	21072329_chr_13	58.4Kb	intact
NZ_CP095237.1	21072329	21072329_pla_p21072329_3_1	39.4Kb	intact
NZ_CP095240.1	21080237	21080237_chr_2	55.6Kb	intact
NZ_CP095240.1	21080237	21080237_chr_3	54.4Kb	intact
NZ_CP095240.1	21080237	21080237_chr_8	39.4Kb	intact
NZ_CP095240.1	21080237	21080237_chr_9	40.4Kb	intact
NZ_CP095244.1	21080237	21080237_pla_p21080237_4_1	39.7Kb	intact
NZ_CP095245.1	21080237	21080237_pla_p21080237_5_1	35Kb	intact
NZ_CP095247.1	21080534	21080534_chr_2	61.3Kb	intact
NZ_CP095247.1	21080534	21080534_chr_3	57.7Kb	intact
NZ_CP095247.1	21080534	21080534_chr_5	58.7Kb	intact
NZ_CP095247.1	21080534	21080534_chr_8	40.3Kb	intact
NZ_CP095247.1	21080534	21080534_chr_10	45.5Kb	intact
NZ_CP095247.1	21080534	21080534_chr_11	37.5Kb	intact
NZ_CP095248.1	21080534	21080534_pla_p21080534_1_1	30.1Kb	intact
NZ_CP095249.1	21080534	21080534_pla_p21080534_2_1	39.2Kb	intact
NZ_CP095253.1	21080937	21080937_chr_1	84.1Kb	intact
NZ_CP095253.1	21080937	21080937_chr_2	41.8Kb	intact
NZ_CP095253.1	21080937	21080937_chr_7	61.3Kb	intact
NZ_CP095253.1	21080937	21080937_chr_8	53.9Kb	intact
NZ_CP095255.1	21080937	21080937_pla_p21080937_2_1	15.4Kb	intact
NZ_CP095257.1	21080937	21080937_pla_p21080937_4_1	35Kb	intact
NZ_CP095258.1	21080937	21080937_pla_p21080937_5_1	25.5Kb	intact
NZ_CP095264.1	21091025	21091025_chr_2	61.3Kb	intact
NZ_CP095264.1	21091025	21091025_chr_3	51.5Kb	intact
NZ_CP095264.1	21091025	21091025_chr_5	57.8Kb	intact
NZ_CP095264.1	21091025	21091025_chr_6	39.3Kb	intact
NZ_CP095264.1	21091025	21091025_chr_8	68Kb	intact
NZ_CP095264.1	21091025	21091025_chr_9	37.5Kb	intact
NZ_CP103727.1	2289	2289_chr_1	23.2Kb	intact
NZ_CP103727.1	2289	2289_chr_2	40.6Kb	intact
NZ_CP103727.1	2289	2289_chr_3	47.8Kb	intact
NZ_CP103728.1	2289	2289_pla_pMB3028_1_1	27.5Kb	intact
NZ_CP011313.1	234-12	234-12_chr_3	49.7Kb	intact
NZ_CP030320.1	23	23er_chr_2	47.8Kb	intact
NZ_CP030320.1	23	23er_chr_3	37.9Kb	intact
NZ_CP030320.1	23	23er_chr_4	20.8Kb	intact
NZ_CP030322.1	23	23er_pla_p23-2_1	108.2Kb	intact
NZ_CP016926.1	23	23yi_chr_2	41.2Kb	intact
NZ_CP016926.1	23	23yi_chr_3	40.7Kb	intact
NZ_CP016925.1	23	23yi_pla_pCTXM15_DHQP1400954_1	41.6Kb	intact
NZ_CP016924.1	23	23yi_pla_pIncFIB_DHQP1400954_1	111.4Kb	intact
NZ_CP103550.1	2791	2791_chr_4	54.1Kb	intact
NZ_CP103550.1	2791	2791_chr_5	40.5Kb	intact
NZ_CP103550.1	2791	2791_chr_6	46.7Kb	intact
NZ_CP103551.1	2791	2791_pla_pMB8806_1_1	38.7Kb	intact
NZ_CP103552.1	2791	2791_pla_pMB8806_2_1	45.2Kb	intact
NZ_CP030300.1	283747	283747_chr_2	61.3Kb	intact
NZ_CP030300.1	283747	283747_chr_3	53.9Kb	intact
NZ_CP030300.1	283747	283747_chr_5	49.5Kb	intact
NZ_CP030300.1	283747	283747_chr_6	56.8Kb	intact
NZ_CP030300.1	283747	283747_chr_9	40.3Kb	intact
NZ_CP030300.1	283747	283747_chr_10	37.5Kb	intact
NZ_CP030301.1	283747	283747_pla_p283747-1_2	40.1Kb	intact
NZ_CP103676.1	2946	2946_chr_4	39.5Kb	intact
NZ_CP103676.1	2946	2946_chr_5	47.9Kb	intact
NZ_CP103676.1	2946	2946_chr_6	33.2Kb	intact
NZ_CP103677.1	2946	2946_pla_pMB4773_1_1	59.3Kb	intact
NZ_CP028478.1	2e	2e1_chr_2	45.5Kb	intact
NZ_CP028478.1	2e	2e1_chr_3	42.6Kb	intact
NZ_CP028478.1	2e	2e1_chr_4	38.3Kb	intact
NZ_CP028478.1	2e	2e1_chr_5	7.6Kb	intact
NZ_CP040175.1	2e	2e2_chr_3	43.9Kb	intact
NZ_CP025541.3	2N3	2N3_chr_1	47.9Kb	intact
NZ_CP025541.3	2N3	2N3_chr_2	56Kb	intact
NZ_CP025541.3	2N3	2N3_chr_3	38.7Kb	intact
NZ_CP025541.3	2N3	2N3_chr_4	39.8Kb	intact
NZ_CP027053.1	2_GR_12	2_GR_12_chr_3	101.4Kb	intact
NZ_CP027053.1	2_GR_12	2_GR_12_chr_4	69.7Kb	intact
NZ_CP027053.1	2_GR_12	2_GR_12_chr_5	37.5Kb	intact
NZ_CP027053.1	2_GR_12	2_GR_12_chr_6	50.9Kb	intact
NZ_CP027055.1	2_GR_12	2_GR_12_pla_IncAC2_1	24Kb	intact
NZ_CP027056.1	2_GR_12	2_GR_12_pla_IncFIB_1	38.7Kb	intact
NZ_CP006923.1	30660/NJST258_1	30660NJST258_1_chr_2	49.3Kb	intact
NZ_CP006923.1	30660/NJST258_1	30660NJST258_1_chr_3	48.8Kb	intact
NZ_CP006923.1	30660/NJST258_1	30660NJST258_1_chr_5	56.9Kb	intact
NZ_CP006923.1	30660/NJST258_1	30660NJST258_1_chr_6	37.5Kb	intact
NZ_CP006923.1	30660/NJST258_1	30660NJST258_1_chr_7	52Kb	intact
NZ_CP006926.1	30660/NJST258_1	30660NJST258_1_pla_pNJST258N2_1	27.7Kb	intact
NZ_CP006918.1	30684/NJST258_2	30684NJST258_2_chr_2	48.1Kb	intact
NZ_CP006918.1	30684/NJST258_2	30684NJST258_2_chr_4	56.9Kb	intact
NZ_CP006918.1	30684/NJST258_2	30684NJST258_2_chr_5	37.4Kb	intact
NZ_CP006918.1	30684/NJST258_2	30684NJST258_2_chr_6	48.5Kb	intact
NZ_CP030296.1	309074	309074_chr_1	57.6Kb	intact
NZ_CP030296.1	309074	309074_chr_2	47.5Kb	intact
NZ_CP030296.1	309074	309074_chr_3	46.7Kb	intact
NZ_CP028850.1	3214	3214_chr_3	41.5Kb	intact
NZ_CP028850.1	3214	3214_chr_6	58Kb	intact
NZ_CP028850.1	3214	3214_chr_7	34.6Kb	intact
NZ_CP010361.1	32192	32192_chr_4	56.9Kb	intact
NZ_CP010361.1	32192	32192_chr_5	42.8Kb	intact
NZ_CP010361.1	32192	32192_chr_6	37.5Kb	intact
NZ_CP010361.1	32192	32192_chr_7	50.9Kb	intact
NZ_CP010575.1	32192	32192_pla_unnamed_2_2	38Kb	intact
NZ_CP103635.1	3221	3221_chr_3	51.1Kb	intact
NZ_CP103635.1	3221	3221_chr_4	40.4Kb	intact
NZ_CP103635.1	3221	3221_chr_5	47.9Kb	intact
NZ_CP103635.1	3221	3221_chr_6	48.7Kb	intact
NZ_CP103636.1	3221	3221_pla_pMB6013_1_1	35.3Kb	intact
NZ_CP099403.1	33221	33221_chr_1	59Kb	intact
NZ_CP099403.1	33221	33221_chr_2	54.6Kb	intact
NZ_CP099403.1	33221	33221_chr_3	58.6Kb	intact
NZ_CP099403.1	33221	33221_chr_5	49.7Kb	intact
NZ_CP099413.1	33367	33367_chr_2	61.3Kb	intact
NZ_CP099413.1	33367	33367_chr_3	53.9Kb	intact
NZ_CP099413.1	33367	33367_chr_5	56.8Kb	intact
NZ_CP099413.1	33367	33367_chr_9	66.9Kb	intact
NZ_CP099413.1	33367	33367_chr_10	37.5Kb	intact
NZ_CP099415.1	33367	33367_pla_pSKLX33367_KPC2_2	27.2Kb	intact
NZ_CP071080.1	3347684I	3347684I_chr_2	32.2Kb	intact
NZ_CP071080.1	3347684I	3347684I_chr_4	47.5Kb	intact
NZ_CP071082.1	3347684I	3347684I_pla_p3347684I_2_1	110.6Kb	intact
NZ_CP071083.1	3347684I	3347684I_pla_p3347684I_3_1	45.5Kb	intact
NZ_CP071086.1	3347689I	3347689I_chr_1	43.2Kb	intact
NZ_CP071086.1	3347689I	3347689I_chr_3	39.5Kb	intact
NZ_CP071086.1	3347689I	3347689I_chr_4	55.7Kb	intact
NZ_CP071086.1	3347689I	3347689I_chr_6	30.3Kb	intact
NZ_CP071086.1	3347689I	3347689I_chr_7	51.4Kb	intact
NZ_CP071086.1	3347689I	3347689I_chr_10	35.6Kb	intact
NZ_CP099409.1	33612	33612_chr_1	47.6Kb	intact
NZ_CP099409.1	33612	33612_chr_5	36Kb	intact
NZ_CP099409.1	33612	33612_chr_6	54.6Kb	intact
NZ_CP099409.1	33612	33612_chr_7	55.9Kb	intact
NZ_CP099409.1	33612	33612_chr_9	47.9Kb	intact
NZ_CP062792.1	33Kpn12	33Kpn12_chr_1	39Kb	intact
NZ_CP062792.1	33Kpn12	33Kpn12_chr_3	38.2Kb	intact
NZ_CP062792.1	33Kpn12	33Kpn12_chr_4	41.9Kb	intact
NZ_CP062792.1	33Kpn12	33Kpn12_chr_5	63.5Kb	intact
NZ_CP062792.1	33Kpn12	33Kpn12_chr_6	59Kb	intact
NZ_CP062792.1	33Kpn12	33Kpn12_chr_8	45.3Kb	intact
NZ_CP062793.1	33Kpn12	33Kpn12_pla_p33Kpn12-1_1	52.8Kb	intact
NZ_CP069046.1	33Kpn22	33Kpn22_chr_2	48.1Kb	intact
NZ_CP069046.1	33Kpn22	33Kpn22_chr_3	51.3Kb	intact
NZ_CP069046.1	33Kpn22	33Kpn22_chr_5	50.1Kb	intact
NZ_CP069046.1	33Kpn22	33Kpn22_chr_7	56.9Kb	intact
NZ_CP069046.1	33Kpn22	33Kpn22_chr_8	37.5Kb	intact
NZ_CP069047.1	33Kpn22	33Kpn22_pla_p33Kpn22-1_2	23.1Kb	intact
NZ_CP034321.1	33	33_chr_2	51.6Kb	intact
NZ_CP034321.1	33	33_chr_3	34.5Kb	intact
NZ_CP034321.1	33	33_chr_4	37.3Kb	intact
NZ_CP034321.1	33	33_chr_5	48.3Kb	intact
NZ_CP034322.1	33	33_pla_pK033_1_2	37.7Kb	intact
NZ_CP010392.1	34618	34618_chr_4	56.9Kb	intact
NZ_CP010392.1	34618	34618_chr_6	62.6Kb	intact
NZ_CP010392.1	34618	34618_chr_7	50.9Kb	intact
NZ_CP010396.1	34618	34618_pla_p34618-71.572kb_3	42.3Kb	intact
NZ_CP103614.1	3571	3571_chr_1	45.1Kb	intact
NZ_CP103614.1	3571	3571_chr_2	31.2Kb	intact
NZ_CP103614.1	3571	3571_chr_4	35.8Kb	intact
NZ_CP103614.1	3571	3571_chr_5	39.6Kb	intact
NZ_CP103615.1	3571	3571_pla_pMB6975_1_1	43.3Kb	intact
NZ_CP082759.1	36	36_chr_2	61.3Kb	intact
NZ_CP082759.1	36	36_chr_3	53.9Kb	intact
NZ_CP082759.1	36	36_chr_5	57.8Kb	intact
NZ_CP082759.1	36	36_chr_8	40.4Kb	intact
NZ_CP082759.1	36	36_chr_10	44.3Kb	intact
NZ_CP082759.1	36	36_chr_11	38.2Kb	intact
NZ_CP082760.1	36	36_pla_pKP36-vir_1	18.3Kb	intact
NZ_CP082762.1	36	36_pla_pKP36_4_1	39.2Kb	intact
NZ_CP082753.1	37	37_chr_2	61.3Kb	intact
NZ_CP082753.1	37	37_chr_3	53.9Kb	intact
NZ_CP082753.1	37	37_chr_5	57.8Kb	intact
NZ_CP082753.1	37	37_chr_9	66.9Kb	intact
NZ_CP082753.1	37	37_chr_10	38.2Kb	intact
NZ_CP082754.1	37	37_pla_pKP37-vir_1	18.3Kb	intact
NZ_CP054268.1	39427	39427_chr_2	48.1Kb	intact
NZ_CP054268.1	39427	39427_chr_3	48.6Kb	intact
NZ_CP054268.1	39427	39427_chr_5	56.9Kb	intact
NZ_CP054268.1	39427	39427_chr_7	62.6Kb	intact
NZ_CP054268.1	39427	39427_chr_8	36.8Kb	intact
NZ_CP054268.1	39427	39427_chr_9	50.9Kb	intact
NZ_CP054265.1	39427	39427_pla_pKPN39427.1_2	24.3Kb	intact
NZ_CP056029.1	39428	39428_chr_4	59.7Kb	intact
NZ_CP056029.1	39428	39428_chr_5	31.9Kb	intact
NZ_CP056029.1	39428	39428_chr_6	37.5Kb	intact
NZ_CP056029.1	39428	39428_chr_7	50.9Kb	intact
NZ_CP056026.1	39428	39428_pla_pKPN39428.2_1	38.7Kb	intact
NZ_CP103548.1	3987	3987_chr_1	46.4Kb	intact
NZ_CP103548.1	3987	3987_chr_2	37.7Kb	intact
NZ_CP103548.1	3987	3987_chr_3	39.4Kb	intact
NZ_CP103548.1	3987	3987_chr_4	51.1Kb	intact
NZ_CP103548.1	3987	3987_chr_7	51.9Kb	intact
NZ_CP103548.1	3987	3987_chr_8	23.3Kb	intact
NZ_CP083047.1	400195-1-18	400195-1-18_chr_2	54.7Kb	intact
NZ_CP083047.1	400195-1-18	400195-1-18_chr_4	49.2Kb	intact
NZ_CP083047.1	400195-1-18	400195-1-18_chr_5	49.9Kb	intact
NZ_CP083047.1	400195-1-18	400195-1-18_chr_6	37.3Kb	intact
NZ_CP083043.1	400195-2-18	400195-2-18_chr_2	54.7Kb	intact
NZ_CP083043.1	400195-2-18	400195-2-18_chr_4	49.2Kb	intact
NZ_CP083043.1	400195-2-18	400195-2-18_chr_5	49.9Kb	intact
NZ_CP083043.1	400195-2-18	400195-2-18_chr_6	37.3Kb	intact
NZ_CP103579.1	4014	4014_chr_3	46.1Kb	intact
NZ_CP103579.1	4014	4014_chr_4	37.7Kb	intact
NZ_CP103579.1	4014	4014_chr_5	32.3Kb	intact
NZ_CP103579.1	4014	4014_chr_7	31.2Kb	intact
NZ_CP103580.1	4014	4014_pla_pMB7964_1_1	39.9Kb	intact
NZ_CP023839.1	2004/1/2	41-2_chr_1	40.2Kb	intact
NZ_CP023839.1	2004/1/2	41-2_chr_2	40.1Kb	intact
NZ_CP023839.1	2004/1/2	41-2_chr_4	55.4Kb	intact
NZ_CP068618.1	41968	41968_chr_4	56.9Kb	intact
NZ_CP068618.1	41968	41968_chr_6	62.6Kb	intact
NZ_CP068618.1	41968	41968_chr_7	46.3Kb	intact
NZ_CP068618.1	41968	41968_chr_8	39.4Kb	intact
NZ_CP068621.1	41968	41968_pla_p41968-R65.8_2	38.4Kb	intact
NZ_CP068614.1	42362	42362_chr_4	48.5Kb	intact
NZ_CP068614.1	42362	42362_chr_7	56.9Kb	intact
NZ_CP068614.1	42362	42362_chr_9	62.6Kb	intact
NZ_CP068614.1	42362	42362_chr_10	42.8Kb	intact
NZ_CP068614.1	42362	42362_chr_11	37.5Kb	intact
NZ_CP068614.1	42362	42362_chr_12	50.9Kb	intact
NZ_CP068617.1	42362	42362_pla_p42362-R67.9_2	40.3Kb	intact
NZ_CP103621.1	433	433_chr_3	34Kb	intact
NZ_CP103618.1	4383	4383_chr_2	60.4Kb	intact
NZ_CP103618.1	4383	4383_chr_3	41.6Kb	intact
NZ_CP103618.1	4383	4383_chr_4	37.8Kb	intact
NZ_CP103605.1	4386	4386_chr_2	56.3Kb	intact
NZ_CP103606.1	4386	4386_pla_pMB7231_1_2	30.1Kb	intact
NZ_CP103607.1	4386	4386_pla_pMB7231_2_1	38.7Kb	intact
NZ_CP068610.1	45706	45706_chr_5	56.9Kb	intact
NZ_CP068610.1	45706	45706_chr_7	62.6Kb	intact
NZ_CP068610.1	45706	45706_chr_8	50.9Kb	intact
NZ_CP068613.1	45706	45706_pla_p45706-R73.3_2	43.5Kb	intact
NZ_CP018306.1	459	459_chr_2	46.4Kb	intact
NZ_CP018306.1	459	459_chr_4	51.1Kb	intact
NZ_CP018306.1	459	459_chr_5	39.5Kb	intact
NZ_CP018306.1	459	459_chr_6	54.5Kb	intact
NZ_CP042318.1	46-16	46-16_chr_4	50.4Kb	intact
NZ_CP042318.1	46-16	46-16_chr_5	28.8Kb	intact
NZ_CP042318.1	46-16	46-16_chr_6	45Kb	intact
NZ_CP103567.1	4680	4680_chr_1	41.1Kb	intact
NZ_CP103567.1	4680	4680_chr_2	36.3Kb	intact
NZ_CP103567.1	4680	4680_chr_5	56.3Kb	intact
NZ_CP103568.1	4680	4680_pla_pMB8190_1_2	41.8Kb	intact
NZ_CP088120.1	46	46_chr_3	18.2Kb	intact
NZ_CP088120.1	46	46_chr_6	38Kb	intact
NZ_CP088123.1	46	46_pla_pKP46-5_1	36.6Kb	intact
NZ_CP103586.1	4737	4737_chr_4	46.2Kb	intact
NZ_CP103586.1	4737	4737_chr_5	47.9Kb	intact
NZ_CP103586.1	4737	4737_chr_6	32.9Kb	intact
NZ_CP103586.1	4737	4737_chr_7	51.9Kb	intact
NZ_CP103587.1	4737	4737_pla_pMB7606_1_1	27Kb	intact
NZ_CP103587.1	4737	4737_pla_pMB7606_1_2	34.3Kb	intact
NZ_CP033625.1	4743	4743_chr_1	39.9Kb	intact
NZ_CP033625.1	4743	4743_chr_4	46.7Kb	intact
NZ_CP033625.1	4743	4743_chr_5	46.5Kb	intact
NZ_CP033625.1	4743	4743_chr_7	48.3Kb	intact
NZ_CP033628.1	4743	4743_pla_unnamed3_1	28.9Kb	intact
NZ_CP033624.1	4743	4743_pla_unnamed6_1	54.2Kb	intact
NZ_CP050360.1	47733	47733_chr_1	57.8Kb	intact
NZ_CP050360.1	47733	47733_chr_2	47.5Kb	intact
NZ_CP050360.1	47733	47733_chr_3	27.1Kb	intact
NZ_CP050360.1	47733	47733_chr_5	41.3Kb	intact
NZ_CP050366.1	47733	47733_pla_p47733L_1	54.4Kb	intact
NZ_CP050364.1	47733	47733_pla_p47733_CTX_M_15_3	40.7Kb	intact
NZ_CP050365.1	47733	47733_pla_p47733_IncFIB_1	114.7Kb	intact
NZ_CP083036.1	4906.28	4906.28_chr_3	46.7Kb	intact
NZ_CP083036.1	4906.28	4906.28_chr_4	47.7Kb	intact
NZ_CP083036.1	4906.28	4906.28_chr_5	40.2Kb	intact
NZ_CP083036.1	4906.28	4906.28_chr_6	59Kb	intact
NZ_CP083036.1	4906.28	4906.28_chr_8	63.2Kb	intact
NZ_CP083036.1	4906.28	4906.28_chr_9	48.3Kb	intact
NZ_CP083037.1	4906.28	4906.28_pla_p1-4906.28_1	32.4Kb	intact
NZ_CP083039.1	4906.28	4906.28_pla_p3-4906.28_1	45.3Kb	intact
NZ_CP088997.1	49088	49088_chr_2	61.3Kb	intact
NZ_CP088997.1	49088	49088_chr_3	53.9Kb	intact
NZ_CP088997.1	49088	49088_chr_5	38.2Kb	intact
NZ_CP088997.1	49088	49088_chr_8	45.1Kb	intact
NZ_CP088997.1	49088	49088_chr_9	46.9Kb	intact
NZ_CP088997.1	49088	49088_chr_10	39.4Kb	intact
NZ_CP089000.1	49088	49088_pla_p49088-279.2_4	35.4Kb	intact
NZ_CP089024.1	49210	49210_chr_2	63.8Kb	intact
NZ_CP089024.1	49210	49210_chr_5	51.3Kb	intact
NZ_CP089024.1	49210	49210_chr_6	56.4Kb	intact
NZ_CP089024.1	49210	49210_chr_8	34.6Kb	intact
NZ_CP089029.1	49210	49210_pla_p49210-124.9_1	45.6Kb	intact
NZ_CP097232.1	4	4_chr_1	41.2Kb	intact
NZ_CP042320.1	5-16	5-16_chr_4	50.4Kb	intact
NZ_CP042320.1	5-16	5-16_chr_5	37.5Kb	intact
NZ_CP042320.1	5-16	5-16_chr_6	45Kb	intact
NZ_CP042320.1	5-16	5-16_chr_8	48.1Kb	intact
NZ_CP011980.1	500_1420	500_1420_chr_4	56.9Kb	intact
NZ_CP011980.1	500_1420	500_1420_chr_5	42.8Kb	intact
NZ_CP011980.1	500_1420	500_1420_chr_6	37.5Kb	intact
NZ_CP011980.1	500_1420	500_1420_chr_7	50.9Kb	intact
NZ_CP011981.1	500_1420	500_1420_pla_p500_1420-130.552kb_1	17.2Kb	intact
NZ_CP099743.1	503666-2-2019	503666-2-2019_chr_4	37.9Kb	intact
NZ_CP050371.1	50595	50595_chr_3	49.1Kb	intact
NZ_CP050371.1	50595	50595_chr_4	38.8Kb	intact
NZ_CP050371.1	50595	50595_chr_7	45Kb	intact
NZ_CP050371.1	50595	50595_chr_8	61Kb	intact
NZ_CP088991.1	50700	50700_chr_2	61Kb	intact
NZ_CP088991.1	50700	50700_chr_3	53.9Kb	intact
NZ_CP088991.1	50700	50700_chr_5	56.8Kb	intact
NZ_CP088991.1	50700	50700_chr_9	68.8Kb	intact
NZ_CP088991.1	50700	50700_chr_10	37.5Kb	intact
NZ_CP088995.1	50700	50700_pla_p50700-140.6_2	27.2Kb	intact
NZ_CP088996.1	50700	50700_pla_p50700-217.1_1	23.6Kb	intact
NZ_CP050376.1	51015	51015_chr_1	64.1Kb	intact
NZ_CP050379.1	51015	51015_pla_p51015_CTX_M_15_2	31.2Kb	intact
NZ_CP050380.1	51015	51015_pla_p51015_NDM_1_3	57.8Kb	intact
NZ_CP085740.1	51135CZ	51135CZ_chr_2	41.4Kb	intact
NZ_CP085740.1	51135CZ	51135CZ_chr_3	46.8Kb	intact
NZ_CP085740.1	51135CZ	51135CZ_chr_7	61.1Kb	intact
NZ_CP085740.1	51135CZ	51135CZ_chr_8	31.5Kb	intact
NZ_CP085742.1	51135CZ	51135CZ_pla_p51135CZ_IncFIB_3	14.1Kb	intact
NZ_CP103560.1	5165	5165_chr_1	15.7Kb	intact
NZ_CP103560.1	5165	5165_chr_5	39.5Kb	intact
NZ_CP103560.1	5165	5165_chr_6	34.3Kb	intact
NZ_CP103560.1	5165	5165_chr_7	49.2Kb	intact
NZ_CP103561.1	5165	5165_pla_pMB8251_1_1	27.8Kb	intact
NZ_CP083032.1	5208.51	5208.51_chr_2	36.9Kb	intact
NZ_CP083032.1	5208.51	5208.51_chr_3	72.4Kb	intact
NZ_CP083032.1	5208.51	5208.51_chr_4	38.3Kb	intact
NZ_CP083032.1	5208.51	5208.51_chr_5	45Kb	intact
NZ_CP083035.1	5208.51	5208.51_pla_p3-5208.51_1	107.3Kb	intact
NZ_CP098352.1	52977_A1	52977_A1_chr_2	48.1Kb	intact
NZ_CP098352.1	52977_A1	52977_A1_chr_3	49.8Kb	intact
NZ_CP098352.1	52977_A1	52977_A1_chr_5	56.9Kb	intact
NZ_CP098352.1	52977_A1	52977_A1_chr_6	37.5Kb	intact
NZ_CP098352.1	52977_A1	52977_A1_chr_7	53.3Kb	intact
NZ_CP098350.1	52980_A4	52980_A4_chr_2	49.3Kb	intact
NZ_CP098350.1	52980_A4	52980_A4_chr_3	49.8Kb	intact
NZ_CP098350.1	52980_A4	52980_A4_chr_5	56.9Kb	intact
NZ_CP098350.1	52980_A4	52980_A4_chr_6	37.5Kb	intact
NZ_CP098350.1	52980_A4	52980_A4_chr_7	53.3Kb	intact
NZ_CP098347.1	52984_A8	52984_A8_chr_2	48.1Kb	intact
NZ_CP098347.1	52984_A8	52984_A8_chr_3	49.8Kb	intact
NZ_CP098347.1	52984_A8	52984_A8_chr_5	56.9Kb	intact
NZ_CP098347.1	52984_A8	52984_A8_chr_6	37.5Kb	intact
NZ_CP098347.1	52984_A8	52984_A8_chr_7	53.3Kb	intact
NZ_CP098343.1	53009_G1	53009_G1_chr_5	45Kb	intact
NZ_CP098343.1	53009_G1	53009_G1_chr_7	62.7Kb	intact
NZ_CP098343.1	53009_G1	53009_G1_chr_8	31.3Kb	intact
NZ_CP098343.1	53009_G1	53009_G1_chr_9	37.5Kb	intact
NZ_CP098343.1	53009_G1	53009_G1_chr_10	55.9Kb	intact
NZ_CP098346.1	53009_G1	53009_G1_pla_p53009-167.9_2	21.8Kb	intact
NZ_CP098340.1	53015_G7	53015_G7_chr_4	45Kb	intact
NZ_CP098340.1	53015_G7	53015_G7_chr_6	62.7Kb	intact
NZ_CP098340.1	53015_G7	53015_G7_chr_7	31.3Kb	intact
NZ_CP098340.1	53015_G7	53015_G7_chr_8	37.5Kb	intact
NZ_CP098340.1	53015_G7	53015_G7_chr_9	54.8Kb	intact
NZ_CP098338.1	53022_J1	53022_J1_chr_3	49.3Kb	intact
NZ_CP098338.1	53022_J1	53022_J1_chr_4	49.8Kb	intact
NZ_CP098338.1	53022_J1	53022_J1_chr_6	56.9Kb	intact
NZ_CP098338.1	53022_J1	53022_J1_chr_7	37.5Kb	intact
NZ_CP098338.1	53022_J1	53022_J1_chr_8	52.1Kb	intact
NZ_CP098335.1	53023_J2	53023_J2_chr_3	48.1Kb	intact
NZ_CP098335.1	53023_J2	53023_J2_chr_4	49.8Kb	intact
NZ_CP098335.1	53023_J2	53023_J2_chr_7	56.9Kb	intact
NZ_CP098335.1	53023_J2	53023_J2_chr_8	37.5Kb	intact
NZ_CP098335.1	53023_J2	53023_J2_chr_9	52.1Kb	intact
NZ_CP088988.1	53322	53322_chr_3	46.5Kb	intact
NZ_CP088982.1	53357	53357_chr_2	47.3Kb	intact
NZ_CP088982.1	53357	53357_chr_3	63.2Kb	intact
NZ_CP088982.1	53357	53357_chr_6	34.6Kb	intact
NZ_CP089021.1	53370	53370_chr_2	47.3Kb	intact
NZ_CP089021.1	53370	53370_chr_3	63.3Kb	intact
NZ_CP089021.1	53370	53370_chr_6	34.6Kb	intact
NZ_CP089014.1	53374	53374_chr_2	49.3Kb	intact
NZ_CP089014.1	53374	53374_chr_3	48.5Kb	intact
NZ_CP089014.1	53374	53374_chr_4	60.3Kb	intact
NZ_CP089014.1	53374	53374_chr_5	36.4Kb	intact
NZ_CP089014.1	53374	53374_chr_6	30.3Kb	intact
NZ_CP089018.1	53374	53374_pla_p53374-110.4_1	108.5Kb	intact
NZ_CP089020.1	53374	53374_pla_p53374-204.7_1	23.8Kb	intact
NZ_CP103512.1	5531	5531_chr_2	45.2Kb	intact
NZ_CP103512.1	5531	5531_chr_3	40.2Kb	intact
NZ_CP103512.1	5531	5531_chr_5	58.5Kb	intact
NZ_CP103512.1	5531	5531_chr_7	34.4Kb	intact
NZ_CP103503.1	5547	5547_chr_3	52.3Kb	intact
NZ_CP103503.1	5547	5547_chr_6	49.2Kb	intact
NZ_CP103503.1	5547	5547_chr_7	37.3Kb	intact
NZ_CP043932.1	555	555_chr_1	41.8Kb	intact
NZ_CP043932.1	555	555_chr_2	50.7Kb	intact
NZ_CP043932.1	555	555_chr_5	45.8Kb	intact
NZ_CP043934.1	555	555_pla_pSCKLB555-2_2	15.9Kb	intact
NZ_CP043934.1	555	555_pla_pSCKLB555-2_3	9Kb	intact
NZ_CP043934.1	555	555_pla_pSCKLB555-2_4	9.7Kb	intact
NZ_CP102077.1	5589	55891_chr_1	42.1Kb	intact
NZ_CP102077.1	5589	55891_chr_2	14.1Kb	intact
NZ_CP103499.1	5589	55892_chr_3	36.9Kb	intact
NZ_CP103499.1	5589	55892_chr_4	38.4Kb	intact
NZ_CP103499.1	5589	55892_chr_5	49.2Kb	intact
NZ_CP089012.1	56575	56575_chr_1	30Kb	intact
NZ_CP089012.1	56575	56575_chr_3	48Kb	intact
NZ_CP089001.1	56661	56661_chr_1	41.4Kb	intact
NZ_CP089001.1	56661	56661_chr_3	41.5Kb	intact
NZ_CP089001.1	56661	56661_chr_4	41.3Kb	intact
NZ_CP089001.1	56661	56661_chr_5	55.4Kb	intact
NZ_CP088126.1	57	57_chr_3	18.2Kb	intact
NZ_CP088126.1	57	57_chr_6	38Kb	intact
NZ_CP088127.1	57	57_pla_pKP57-3_2	44.4Kb	intact
NZ_CP085729.1	59062CZ	59062CZ_chr_1	49.3Kb	intact
NZ_CP085729.1	59062CZ	59062CZ_chr_2	40.5Kb	intact
NZ_CP085729.1	59062CZ	59062CZ_chr_4	52.9Kb	intact
NZ_CP085729.1	59062CZ	59062CZ_chr_5	38.3Kb	intact
NZ_CP085729.1	59062CZ	59062CZ_chr_7	46.7Kb	intact
NZ_CP085731.1	59062CZ	59062CZ_pla_p59062CZ_IncC_KPC_1	31.9Kb	intact
NZ_CP085732.1	59062CZ	59062CZ_pla_p59062CZ_IncFIB_1	12.6Kb	intact
NZ_CP085732.1	59062CZ	59062CZ_pla_p59062CZ_IncFIB_2	20.7Kb	intact
NZ_CP068602.1	59493	59493_chr_4	10.3Kb	intact
NZ_CP068602.1	59493	59493_chr_7	56.9Kb	intact
NZ_CP068602.1	59493	59493_chr_8	42.8Kb	intact
NZ_CP068602.1	59493	59493_chr_9	37.5Kb	intact
NZ_CP068602.1	59493	59493_chr_10	52.2Kb	intact
NZ_CP097228.1	5	5_chr_1	63Kb	intact
NZ_CP026495.1	616	616_chr_4	39.5Kb	intact
NZ_OX337252.1	65326252-51f1-11ec-980a-fa163eea3084	65326252_chr_1_2	50.5Kb	intact
NZ_OX337252.1	65326252-51f1-11ec-980a-fa163eea3084	65326252_chr_1_4	43.9Kb	intact
NZ_OX337253.1	65326252-51f1-11ec-980a-fa163eea3084	65326252_pla_2_1	46.6Kb	intact
NZ_OX337254.1	65326252-51f1-11ec-980a-fa163eea3084	65326252_pla_3_1	112.7Kb	intact
NZ_CP083026.1	6604.68	6604.68_chr_4	46.7Kb	intact
NZ_CP083026.1	6604.68	6604.68_chr_6	47.7Kb	intact
NZ_CP083026.1	6604.68	6604.68_chr_7	42.1Kb	intact
NZ_CP083026.1	6604.68	6604.68_chr_8	50Kb	intact
NZ_CP083027.1	6604.68	6604.68_pla_p1-6604.68-OXA48_1	20.3Kb	intact
NZ_CP083027.1	6604.68	6604.68_pla_p1-6604.68-OXA48_4	15.2Kb	intact
NZ_CP083028.1	6604.68	6604.68_pla_p2-6604.68_2	27.8Kb	intact
NZ_CP083021.1	6611.48	6611.48_chr_4	46.7Kb	intact
NZ_CP083021.1	6611.48	6611.48_chr_6	47.7Kb	intact
NZ_CP083021.1	6611.48	6611.48_chr_7	42.1Kb	intact
NZ_CP083021.1	6611.48	6611.48_chr_8	50Kb	intact
NZ_CP083022.1	6611.48	6611.48_pla_p1-6611.48-OXA48_4	15.3Kb	intact
NZ_CP083016.1	6709.15-I	6709.15-I_chr_4	46.7Kb	intact
NZ_CP083016.1	6709.15-I	6709.15-I_chr_6	47.7Kb	intact
NZ_CP083016.1	6709.15-I	6709.15-I_chr_7	42.1Kb	intact
NZ_CP083016.1	6709.15-I	6709.15-I_chr_8	50Kb	intact
NZ_CP083017.1	6709.15-I	6709.15-I_pla_p1-6709.15-I-OXA48_2	46.2Kb	intact
NZ_CP083011.1	6710.71	6710.71_chr_1	64.6Kb	intact
NZ_CP083011.1	6710.71	6710.71_chr_3	46.7Kb	intact
NZ_CP083011.1	6710.71	6710.71_chr_4	47.7Kb	intact
NZ_CP083011.1	6710.71	6710.71_chr_5	41Kb	intact
NZ_CP083011.1	6710.71	6710.71_chr_6	52.1Kb	intact
NZ_CP083011.1	6710.71	6710.71_chr_8	46.6Kb	intact
NZ_CP083007.1	6711.43	6711.43_chr_5	65.1Kb	intact
NZ_CP083007.1	6711.43	6711.43_chr_6	37.5Kb	intact
NZ_CP083007.1	6711.43	6711.43_chr_7	50.9Kb	intact
NZ_CP083008.1	6711.43	6711.43_pla_p1-6711.43-KPC2_3	38.7Kb	intact
NZ_CP083000.1	6712.08	6712.08_chr_2	64.6Kb	intact
NZ_CP083000.1	6712.08	6712.08_chr_4	46.7Kb	intact
NZ_CP083000.1	6712.08	6712.08_chr_5	96.1Kb	intact
NZ_CP083000.1	6712.08	6712.08_chr_7	48.3Kb	intact
NZ_CP083001.1	6712.08	6712.08_pla_p1-6712.08-KPC3_3	61.5Kb	intact
NZ_CP082995.1	6911.28	6911.28_chr_2	48.1Kb	intact
NZ_CP082995.1	6911.28	6911.28_chr_3	60.3Kb	intact
NZ_CP082995.1	6911.28	6911.28_chr_5	43.2Kb	intact
NZ_CP082995.1	6911.28	6911.28_chr_6	40.1Kb	intact
NZ_CP082988.1	7008.2	7008.20_chr_1	40.2Kb	intact
NZ_CP082988.1	7008.2	7008.20_chr_2	40.2Kb	intact
NZ_CP082988.1	7008.2	7008.20_chr_3	50.2Kb	intact
NZ_CP082991.1	7008.2	7008.20_pla_p3-7008.20_1	111.5Kb	intact
NZ_CP082992.1	7008.2	7008.20_pla_p4-7008.20-NDM1_1	28.5Kb	intact
NZ_CP082985.1	7011.62	7011.62_chr_3	72.4Kb	intact
NZ_CP082985.1	7011.62	7011.62_chr_4	37.5Kb	intact
NZ_CP082985.1	7011.62	7011.62_chr_5	38.9Kb	intact
NZ_CP082985.1	7011.62	7011.62_chr_7	49.6Kb	intact
NZ_CP082986.1	7011.62	7011.62_pla_p1-7011.62-NDM1_2	14.8Kb	intact
NZ_CP030292.1	721005	721005er_chr_2	62Kb	intact
NZ_CP030292.1	721005	721005er_chr_3	53.4Kb	intact
NZ_CP030292.1	721005	721005er_chr_5	33.5Kb	intact
NZ_CP030292.1	721005	721005er_chr_6	58.7Kb	intact
NZ_CP030292.1	721005	721005er_chr_8	40.3Kb	intact
NZ_CP030292.1	721005	721005er_chr_10	37.5Kb	intact
NZ_CP030294.1	721005	721005er_pla_p721005-2_2	36.5Kb	intact
NZ_CP022997.1	721005	721005yi_chr_2	33.5Kb	intact
NZ_CP022997.1	721005	721005yi_chr_3	58.7Kb	intact
NZ_CP022997.1	721005	721005yi_chr_5	40.3Kb	intact
NZ_CP022997.1	721005	721005yi_chr_7	37.5Kb	intact
NZ_CP022997.1	721005	721005yi_chr_11	62Kb	intact
NZ_CP022997.1	721005	721005yi_chr_12	53.4Kb	intact
NZ_CP099748.1	806883-10-2019	806883-10-2019_chr_4	37.9Kb	intact
NZ_CP017985.1	825795-1	825795-1_chr_1	40.2Kb	intact
NZ_CP017985.1	825795-1	825795-1_chr_2	48.7Kb	intact
NZ_CP017985.1	825795-1	825795-1_chr_4	61.3Kb	intact
NZ_CP017988.1	825795-1	825795-1_pla_unnamed3_1	72.9Kb	intact
NZ_CP017989.1	825795-1	825795-1_pla_unnamed4_1	21.4Kb	intact
NZ_CP017989.1	825795-1	825795-1_pla_unnamed4_2	27.5Kb	intact
NZ_CP109973.1	857	857_chr_3	60.8Kb	intact
NZ_CP109973.1	857	857_chr_4	50.9Kb	intact
NZ_CP109973.1	857	857_chr_6	55.9Kb	intact
NZ_CP109973.1	857	857_chr_9	33.8Kb	intact
NZ_CP109973.1	857	857_chr_11	37.5Kb	intact
NZ_CP085889.1	8695	8695_chr_2	61.3Kb	intact
NZ_CP085889.1	8695	8695_chr_3	55.1Kb	intact
NZ_CP085889.1	8695	8695_chr_5	56.8Kb	intact
NZ_CP085889.1	8695	8695_chr_8	40.3Kb	intact
NZ_CP085889.1	8695	8695_chr_9	47.4Kb	intact
NZ_CP085889.1	8695	8695_chr_10	37.5Kb	intact
NZ_CP085890.1	8695	8695_pla_pFK8695-KPC-33_2	32.2Kb	intact
NZ_CP085891.1	8695	8695_pla_pFK8695-rmpA_2	22.2Kb	intact
NZ_CP071819.1	90CM2	90CM2_chr_1	41.2Kb	intact
NZ_CP071819.1	90CM2	90CM2_chr_2	23.2Kb	intact
NZ_CP071819.1	90CM2	90CM2_chr_3	50.1Kb	intact
NZ_CP071819.1	90CM2	90CM2_chr_4	45.5Kb	intact
NZ_CP071821.1	90CM2	90CM2_pla_p90CM2-172k_1	11.5Kb	intact
NZ_CP022882.1	911021	911021_chr_1	56.8Kb	intact
NZ_CP022882.1	911021	911021_chr_4	40.3Kb	intact
NZ_CP022882.1	911021	911021_chr_5	29.9Kb	intact
NZ_CP022882.1	911021	911021_chr_10	51.1Kb	intact
NZ_CP022882.1	911021	911021_chr_11	53.9Kb	intact
NZ_CP103731.1	913	913_chr_1	46.4Kb	intact
NZ_CP103731.1	913	913_chr_2	43.5Kb	intact
NZ_CP103731.1	913	913_chr_5	38.5Kb	intact
NZ_CP103731.1	913	913_chr_6	51.4Kb	intact
NZ_CP103732.1	913	913_pla_pMB2930_1_2	31.8Kb	intact
NZ_CP014755.1	AATZP	AATZP_chr_1	57.1Kb	intact
NZ_CP014755.1	AATZP	AATZP_chr_2	41.3Kb	intact
NZ_CP014758.1	AATZP	AATZP_pla_pKPN-041_1	37Kb	intact
NZ_CP014756.1	AATZP	AATZP_pla_pKPN-04f_1	120.8Kb	intact
NZ_CP014757.1	AATZP	AATZP_pla_pNDM-1fa_1	22.8Kb	intact
NZ_CP036442.1	ABFPV	ABFPV_chr_1	38.4Kb	intact
NZ_CP036442.1	ABFPV	ABFPV_chr_3	58.3Kb	intact
NZ_CP036442.1	ABFPV	ABFPV_chr_4	42.6Kb	intact
NZ_CP036444.1	ABFPV	ABFPV_pla_tig00001255_pilon_1	52.9Kb	intact
NZ_CP036438.1	ABFQB	ABFQB_chr_1	25.5Kb	intact
NZ_CP036438.1	ABFQB	ABFQB_chr_3	47.2Kb	intact
NZ_CP036438.1	ABFQB	ABFQB_chr_5	37.8Kb	intact
NZ_CP086447.1	AE-2247421-T0	AE-2247421-T0_chr_4	46.7Kb	intact
NZ_CP086447.1	AE-2247421-T0	AE-2247421-T0_chr_6	47.7Kb	intact
NZ_CP086447.1	AE-2247421-T0	AE-2247421-T0_chr_7	41Kb	intact
NZ_CP086447.1	AE-2247421-T0	AE-2247421-T0_chr_9	50Kb	intact
NZ_CP086449.1	AE-2247421-T0	AE-2247421-T0_pla_p2247421-T0_2_2	28.2Kb	intact
NZ_CP086450.1	AE-2247421-T0	AE-2247421-T0_pla_p2247421-T0_3_3	23.3Kb	intact
NZ_CP086416.1	AE-2247421-T20-ESBL	AE-2247421-T20-ESBL_chr_4	46.7Kb	intact
NZ_CP086416.1	AE-2247421-T20-ESBL	AE-2247421-T20-ESBL_chr_6	47.7Kb	intact
NZ_CP086416.1	AE-2247421-T20-ESBL	AE-2247421-T20-ESBL_chr_7	41Kb	intact
NZ_CP086416.1	AE-2247421-T20-ESBL	AE-2247421-T20-ESBL_chr_9	50Kb	intact
NZ_CP086418.1	AE-2247421-T20-ESBL	AE-2247421-T20-ESBL_pla_p2247421-T20-ESBL_2_2	28.2Kb	intact
NZ_CP086419.1	AE-2247421-T20-ESBL	AE-2247421-T20-ESBL_pla_p2247421-T20-ESBL_3_3	23.4Kb	intact
NZ_CP086423.1	AE-2247421-T20-MAC	AE-2247421-T20-MAC_chr_5	46.7Kb	intact
NZ_CP086423.1	AE-2247421-T20-MAC	AE-2247421-T20-MAC_chr_7	47.7Kb	intact
NZ_CP086423.1	AE-2247421-T20-MAC	AE-2247421-T20-MAC_chr_8	41Kb	intact
NZ_CP086423.1	AE-2247421-T20-MAC	AE-2247421-T20-MAC_chr_10	50Kb	intact
NZ_CP086425.1	AE-2247421-T20-MAC	AE-2247421-T20-MAC_pla_p2247421-T20-MAC_2_2	28.2Kb	intact
NZ_CP086426.1	AE-2247421-T20-MAC	AE-2247421-T20-MAC_pla_p2247421-T20-MAC_3_3	30.1Kb	intact
NZ_CP086431.1	AE-2247421-T5-ESBL	AE-2247421-T5-ESBL_chr_4	46.7Kb	intact
NZ_CP086431.1	AE-2247421-T5-ESBL	AE-2247421-T5-ESBL_chr_6	47.7Kb	intact
NZ_CP086431.1	AE-2247421-T5-ESBL	AE-2247421-T5-ESBL_chr_7	41Kb	intact
NZ_CP086431.1	AE-2247421-T5-ESBL	AE-2247421-T5-ESBL_chr_9	50Kb	intact
NZ_CP086433.1	AE-2247421-T5-ESBL	AE-2247421-T5-ESBL_pla_p2247421-T5-ESBL_2_2	28.2Kb	intact
NZ_CP086434.1	AE-2247421-T5-ESBL	AE-2247421-T5-ESBL_pla_p2247421-T5-ESBL_3_3	30.1Kb	intact
NZ_CP086439.1	AE-2247421-T5-MAC	AE-2247421-T5-MAC_chr_4	46.7Kb	intact
NZ_CP086439.1	AE-2247421-T5-MAC	AE-2247421-T5-MAC_chr_6	47.7Kb	intact
NZ_CP086439.1	AE-2247421-T5-MAC	AE-2247421-T5-MAC_chr_7	41Kb	intact
NZ_CP086439.1	AE-2247421-T5-MAC	AE-2247421-T5-MAC_chr_9	50Kb	intact
NZ_CP086441.1	AE-2247421-T5-MAC	AE-2247421-T5-MAC_pla_p2247421-T5-MAC_2_2	28.2Kb	intact
NZ_CP086442.1	AE-2247421-T5-MAC	AE-2247421-T5-MAC_pla_p2247421-T5-MAC_3_3	23.4Kb	intact
NZ_CP091048.1	AHSWKP25	AHSWKP25_chr_4	43.6Kb	intact
NZ_CP091050.1	AHSWKP25	AHSWKP25_pla_pSW25HRG_3	32.1Kb	intact
NZ_CP091051.1	AHSWKP25	AHSWKP25_pla_pSW25tet_A_3	33.1Kb	intact
NZ_LR130541.1	AJ218	AJ218_chr_1_2	40.5Kb	intact
NZ_LR130541.1	AJ218	AJ218_chr_1_4	60.9Kb	intact
NZ_LR130541.1	AJ218	AJ218_chr_1_5	77.4Kb	intact
NZ_CP035383.1	AP8555	AP8555_chr_1	53.2Kb	intact
NZ_CP035383.1	AP8555	AP8555_chr_2	47.3Kb	intact
NZ_CP035383.1	AP8555	AP8555_chr_4	34.6Kb	intact
NZ_CP039954.1	AR142_2b	AR142_2b_chr_4	39.5Kb	intact
NZ_CP039954.1	AR142_2b	AR142_2b_chr_5	57.6Kb	intact
NZ_CP039955.1	AR142_2b	AR142_2b_pla_pMBR_CTX-M-15_AR142_2b_1	29.8Kb	intact
NZ_CP029137.1	AR376	AR376_chr_1	37.8Kb	intact
NZ_CP029137.1	AR376	AR376_chr_2	54.1Kb	intact
NZ_CP029137.1	AR376	AR376_chr_3	46.4Kb	intact
NZ_CP029136.1	AR376	AR376_pla_unnamed2_1	18.8Kb	intact
NZ_CP029099.1	AR438	AR438_chr_2	48.1Kb	intact
NZ_CP029099.1	AR438	AR438_chr_3	48.6Kb	intact
NZ_CP029099.1	AR438	AR438_chr_5	56.9Kb	intact
NZ_CP029099.1	AR438	AR438_chr_7	62.6Kb	intact
NZ_CP029099.1	AR438	AR438_chr_8	37.5Kb	intact
NZ_CP029099.1	AR438	AR438_chr_9	50.9Kb	intact
NZ_CP029101.1	AR438	AR438_pla_unnamed3_3	20.9Kb	intact
NZ_CP029102.1	AR438	AR438_pla_unnamed4_2	52.8Kb	intact
NZ_CP029102.1	AR438	AR438_pla_unnamed4_3	18.1Kb	intact
NZ_CP081816.1	AR8416	AR8416_chr_1	65.8Kb	intact
NZ_CP033946.1	ARLG-3135	ARLG-3135_chr_4	45.7Kb	intact
NZ_CP033947.1	ARLG-3135	ARLG-3135_pla_p1_1	47.4Kb	intact
NZ_CP032222.1	AR_0046	AR_0046_chr_1	22.1Kb	intact
NZ_CP032222.1	AR_0046	AR_0046_chr_5	41.3Kb	intact
NZ_CP032224.1	AR_0046	AR_0046_pla_unnamed2_1	72.9Kb	intact
NZ_CP032225.1	AR_0046	AR_0046_pla_unnamed3_1	108.1Kb	intact
NZ_CP021539.1	AR_0047	AR_0047_chr_3	51.4Kb	intact
NZ_CP021539.1	AR_0047	AR_0047_chr_4	37.5Kb	intact
NZ_CP021539.1	AR_0047	AR_0047_chr_5	61Kb	intact
NZ_CP021539.1	AR_0047	AR_0047_chr_7	45Kb	intact
NZ_CP021539.1	AR_0047	AR_0047_chr_11	50Kb	intact
NZ_CP021540.1	AR_0047	AR_0047_pla_tig00000001_2	21.6Kb	intact
NZ_CP018816.1	AR_0049	AR_0049_chr_3	48.1Kb	intact
NZ_CP018816.1	AR_0049	AR_0049_chr_4	46.7Kb	intact
NZ_CP018816.1	AR_0049	AR_0049_chr_6	9.2Kb	intact
NZ_CP018816.1	AR_0049	AR_0049_chr_8	60.3Kb	intact
NZ_CP018816.1	AR_0049	AR_0049_chr_11	37.5Kb	intact
NZ_CP018816.1	AR_0049	AR_0049_chr_12	50.9Kb	intact
NZ_CP026751.1	AR_0066	AR_0066_chr_1	36.2Kb	intact
NZ_CP026751.1	AR_0066	AR_0066_chr_2	41.2Kb	intact
NZ_CP026751.1	AR_0066	AR_0066_chr_6	44.6Kb	intact
NZ_CP026751.1	AR_0066	AR_0066_chr_7	49.2Kb	intact
NZ_CP026753.1	AR_0066	AR_0066_pla_tig00000084_pilon_3	29.7Kb	intact
NZ_CP020067.1	AR_0068	AR_0068_chr_1	37.3Kb	intact
NZ_CP020067.1	AR_0068	AR_0068_chr_4	40.1Kb	intact
NZ_CP020067.1	AR_0068	AR_0068_chr_6	49.2Kb	intact
NZ_CP020067.1	AR_0068	AR_0068_chr_7	53.4Kb	intact
NZ_CP020068.1	AR_0068	AR_0068_pla_unitig_1_5	48.5Kb	intact
NZ_CP032185.1	AR_0075	AR_0075_chr_1	42.5Kb	intact
NZ_CP032185.1	AR_0075	AR_0075_chr_2	38.3Kb	intact
NZ_CP032185.1	AR_0075	AR_0075_chr_3	39.4Kb	intact
NZ_CP032185.1	AR_0075	AR_0075_chr_4	57.7Kb	intact
NZ_CP032185.1	AR_0075	AR_0075_chr_5	48.9Kb	intact
NZ_CP032187.1	AR_0075	AR_0075_pla_unnamed2_1	110.4Kb	intact
NZ_CP032188.1	AR_0075	AR_0075_pla_unnamed3_1	40.3Kb	intact
NZ_CP032191.1	AR_0075	AR_0075_pla_unnamed6_1	77.6Kb	intact
NZ_CP032167.1	AR_0076	AR_0076_chr_3	36.7Kb	intact
NZ_CP032167.1	AR_0076	AR_0076_chr_4	49.8Kb	intact
NZ_CP032167.1	AR_0076	AR_0076_chr_5	57.8Kb	intact
NZ_CP028994.1	AR_0079	AR_0079_chr_4	49.1Kb	intact
NZ_CP028994.1	AR_0079	AR_0079_chr_5	30.3Kb	intact
NZ_CP028994.1	AR_0079	AR_0079_chr_6	45.6Kb	intact
NZ_CP028994.1	AR_0079	AR_0079_chr_8	96.3Kb	intact
NZ_CP028994.1	AR_0079	AR_0079_chr_9	60.4Kb	intact
NZ_CP028994.1	AR_0079	AR_0079_chr_10	35.3Kb	intact
NZ_CP028994.1	AR_0079	AR_0079_chr_11	48.1Kb	intact
NZ_CP028997.1	AR_0079	AR_0079_pla_unnamed4_1	106.7Kb	intact
NZ_CP029738.1	AR_0087	AR_0087_chr_1	40.6Kb	intact
NZ_CP029738.1	AR_0087	AR_0087_chr_2	38.3Kb	intact
NZ_CP029738.1	AR_0087	AR_0087_chr_3	50.3Kb	intact
NZ_CP029738.1	AR_0087	AR_0087_chr_6	48.7Kb	intact
NZ_CP029739.1	AR_0087	AR_0087_pla_unnamed1_4	18.1Kb	intact
NZ_CP027612.1	AR_0096	AR_0096_chr_1	29.8Kb	intact
NZ_CP027612.1	AR_0096	AR_0096_chr_3	45.7Kb	intact
NZ_CP027612.1	AR_0096	AR_0096_chr_4	36.8Kb	intact
NZ_CP027612.1	AR_0096	AR_0096_chr_5	40.6Kb	intact
NZ_CP027612.1	AR_0096	AR_0096_chr_6	46.1Kb	intact
NZ_CP027613.1	AR_0096	AR_0096_pla_unnamed1_1	59.5Kb	intact
NZ_CP027615.1	AR_0096	AR_0096_pla_unnamed3_1	107Kb	intact
NZ_CP027616.1	AR_0096	AR_0096_pla_unnamed4_1	51.5Kb	intact
NZ_CP032200.1	AR_0097	AR_0097_chr_2	45.7Kb	intact
NZ_CP032200.1	AR_0097	AR_0097_chr_4	29.8Kb	intact
NZ_CP032200.1	AR_0097	AR_0097_chr_5	54.1Kb	intact
NZ_CP032200.1	AR_0097	AR_0097_chr_6	40.6Kb	intact
NZ_CP032196.1	AR_0097	AR_0097_pla_unnamed2_1	108.6Kb	intact
NZ_CP032197.1	AR_0097	AR_0097_pla_unnamed3_2	42.6Kb	intact
NZ_CP020108.1	AR_0098	AR_0098_chr_1	56.9Kb	intact
NZ_CP020108.1	AR_0098	AR_0098_chr_4	49.3Kb	intact
NZ_CP020108.1	AR_0098	AR_0098_chr_5	44.1Kb	intact
NZ_CP020108.1	AR_0098	AR_0098_chr_6	37.5Kb	intact
NZ_CP020108.1	AR_0098	AR_0098_chr_7	52Kb	intact
NZ_CP020110.1	AR_0098	AR_0098_pla_tig00000002_1	37.1Kb	intact
NZ_CP021955.1	AR_0107	AR_0107_chr_1	46.7Kb	intact
NZ_CP021955.1	AR_0107	AR_0107_chr_2	34.9Kb	intact
NZ_CP021955.1	AR_0107	AR_0107_chr_3	44.3Kb	intact
NZ_CP021955.1	AR_0107	AR_0107_chr_6	49.6Kb	intact
NZ_CP021955.1	AR_0107	AR_0107_chr_7	67.3Kb	intact
NZ_CP021955.1	AR_0107	AR_0107_chr_8	47.5Kb	intact
NZ_CP021955.1	AR_0107	AR_0107_chr_10	38.8Kb	intact
NZ_CP021957.1	AR_0107	AR_0107_pla_unitig_3j2_linear_pilon_1	71.1Kb	intact
NZ_CP032207.1	AR_0109	AR_0109_chr_5	37.5Kb	intact
NZ_CP032207.1	AR_0109	AR_0109_chr_7	102.7Kb	intact
NZ_CP032208.1	AR_0109	AR_0109_pla_unnamed2_2	28.5Kb	intact
NZ_CP032208.1	AR_0109	AR_0109_pla_unnamed2_3	22.7Kb	intact
NZ_CP032212.1	AR_0109	AR_0109_pla_unnamed6_1	30.8Kb	intact
NZ_CP032212.1	AR_0109	AR_0109_pla_unnamed6_3	26.2Kb	intact
NZ_CP021549.1	AR_0112	AR_0112_chr_3	49.1Kb	intact
NZ_CP021549.1	AR_0112	AR_0112_chr_4	37.5Kb	intact
NZ_CP021549.1	AR_0112	AR_0112_chr_5	67.5Kb	intact
NZ_CP021549.1	AR_0112	AR_0112_chr_6	45Kb	intact
NZ_CP021549.1	AR_0112	AR_0112_chr_8	48.1Kb	intact
NZ_CP021544.1	AR_0112	AR_0112_pla_tig00000000_2	21.6Kb	intact
NZ_CP021751.1	AR_0113	AR_0113_chr_3	49.1Kb	intact
NZ_CP021751.1	AR_0113	AR_0113_chr_4	37.5Kb	intact
NZ_CP021751.1	AR_0113	AR_0113_chr_5	67.1Kb	intact
NZ_CP021751.1	AR_0113	AR_0113_chr_6	45Kb	intact
NZ_CP021751.1	AR_0113	AR_0113_chr_8	48.1Kb	intact
NZ_CP021752.1	AR_0113	AR_0113_pla_unitig_1_3	21.6Kb	intact
NZ_CP020071.1	AR_0115	AR_0115_chr_1	39.6Kb	intact
NZ_CP020071.1	AR_0115	AR_0115_chr_5	49.1Kb	intact
NZ_CP020071.1	AR_0115	AR_0115_chr_6	37.5Kb	intact
NZ_CP020071.1	AR_0115	AR_0115_chr_7	61Kb	intact
NZ_CP020071.1	AR_0115	AR_0115_chr_9	45Kb	intact
NZ_CP020072.1	AR_0115	AR_0115_pla_tig00000002_2	21.6Kb	intact
NZ_CP020061.1	AR_0117	AR_0117_chr_2	39Kb	intact
NZ_CP020063.1	AR_0117	AR_0117_pla_unitig_2_1	108.6Kb	intact
NZ_CP021833.1	AR_0120	AR_0120_chr_1	38.7Kb	intact
NZ_CP021833.1	AR_0120	AR_0120_chr_2	45Kb	intact
NZ_CP021833.1	AR_0120	AR_0120_chr_5	57.6Kb	intact
NZ_CP021833.1	AR_0120	AR_0120_chr_6	48.1Kb	intact
NZ_CP021834.1	AR_0120	AR_0120_pla_tig00000500_pilon_3	22.2Kb	intact
NZ_CP021835.1	AR_0120	AR_0120_pla_tig00000516_pilon_2	41.9Kb	intact
NZ_CP021859.1	AR_0125	AR_0125_chr_1	45Kb	intact
NZ_CP021859.1	AR_0125	AR_0125_chr_2	57.6Kb	intact
NZ_CP021859.1	AR_0125	AR_0125_chr_3	48.1Kb	intact
NZ_CP021859.1	AR_0125	AR_0125_chr_7	37.5Kb	intact
NZ_CP021740.1	AR_0126	AR_0126_chr_1	36.7Kb	intact
NZ_CP021740.1	AR_0126	AR_0126_chr_2	38.4Kb	intact
NZ_CP021740.1	AR_0126	AR_0126_chr_4	44.7Kb	intact
NZ_CP021740.1	AR_0126	AR_0126_chr_5	35.6Kb	intact
NZ_CP021740.1	AR_0126	AR_0126_chr_7	31.1Kb	intact
NZ_CP021718.1	AR_0129	AR_0129_chr_2	37.5Kb	intact
NZ_CP021718.1	AR_0129	AR_0129_chr_3	39.2Kb	intact
NZ_CP021718.1	AR_0129	AR_0129_chr_5	60.5Kb	intact
NZ_CP021718.1	AR_0129	AR_0129_chr_7	54.2Kb	intact
NZ_CP021718.1	AR_0129	AR_0129_chr_8	50.5Kb	intact
NZ_CP021713.1	AR_0129	AR_0129_pla_tig00000000_3	21.6Kb	intact
NZ_CP021714.1	AR_0129	AR_0129_pla_tig00000001_1	104.7Kb	intact
NZ_CP032178.1	AR_0135	AR_0135_chr_1	46.7Kb	intact
NZ_CP032178.1	AR_0135	AR_0135_chr_3	64.6Kb	intact
NZ_CP032178.1	AR_0135	AR_0135_chr_5	45.5Kb	intact
NZ_CP032178.1	AR_0135	AR_0135_chr_8	38.1Kb	intact
NZ_CP032176.1	AR_0135	AR_0135_pla_unnamed1_1	30.3Kb	intact
NZ_CP021757.1	AR_0138	AR_0138_chr_1	55.2Kb	intact
NZ_CP021757.1	AR_0138	AR_0138_chr_2	18Kb	intact
NZ_CP021757.1	AR_0138	AR_0138_chr_3	47Kb	intact
NZ_CP021757.1	AR_0138	AR_0138_chr_4	31.3Kb	intact
NZ_CP021757.1	AR_0138	AR_0138_chr_5	41.3Kb	intact
NZ_CP021760.1	AR_0138	AR_0138_pla_tig00000003_1	50.8Kb	intact
NZ_CP021761.1	AR_0138	AR_0138_pla_tig00000004_2	28.3Kb	intact
NZ_CP021960.1	AR_0139	AR_0139_chr_1	64Kb	intact
NZ_CP021960.1	AR_0139	AR_0139_chr_3	55.6Kb	intact
NZ_CP021960.1	AR_0139	AR_0139_chr_5	44Kb	intact
NZ_CP021960.1	AR_0139	AR_0139_chr_6	47Kb	intact
NZ_CP021960.1	AR_0139	AR_0139_chr_7	49.9Kb	intact
NZ_CP021962.1	AR_0139	AR_0139_pla_tig00000008_1	98.7Kb	intact
NZ_CP029722.1	AR_0140	AR_0140_chr_2	37.5Kb	intact
NZ_CP029722.1	AR_0140	AR_0140_chr_3	40.9Kb	intact
NZ_CP029722.1	AR_0140	AR_0140_chr_6	90.6Kb	intact
NZ_CP029723.1	AR_0140	AR_0140_pla_unnamed1_3	38.7Kb	intact
NZ_CP029724.1	AR_0140	AR_0140_pla_unnamed2_2	32.6Kb	intact
NZ_CP028953.1	AR_0141	AR_0141_chr_1	82.4Kb	intact
NZ_CP028953.1	AR_0141	AR_0141_chr_3	38.6Kb	intact
NZ_CP028953.1	AR_0141	AR_0141_chr_4	16.9Kb	intact
NZ_CP028955.1	AR_0141	AR_0141_pla_unnamed2_2	46.9Kb	intact
NZ_CP028990.1	AR_0142	AR_0142_chr_2	89.5Kb	intact
NZ_CP028990.1	AR_0142	AR_0142_chr_4	38.6Kb	intact
NZ_CP028990.1	AR_0142	AR_0142_chr_6	44.6Kb	intact
NZ_CP028991.1	AR_0142	AR_0142_pla_unnamed1_1	38.8Kb	intact
NZ_CP028992.1	AR_0142	AR_0142_pla_unnamed2_1	68.7Kb	intact
NZ_CP021708.1	AR_0143	AR_0143_chr_1	41.5Kb	intact
NZ_CP021708.1	AR_0143	AR_0143_chr_3	44.6Kb	intact
NZ_CP021708.1	AR_0143	AR_0143_chr_4	49.2Kb	intact
NZ_CP021708.1	AR_0143	AR_0143_chr_5	37.3Kb	intact
NZ_CP021708.1	AR_0143	AR_0143_chr_6	40Kb	intact
NZ_CP021712.1	AR_0143	AR_0143_pla_tig00000857_3	38.7Kb	intact
NZ_CP021939.1	AR_0145	AR_0145_chr_1	41.3Kb	intact
NZ_CP021939.1	AR_0145	AR_0145_chr_3	57.1Kb	intact
NZ_CP021939.1	AR_0145	AR_0145_chr_4	75.4Kb	intact
NZ_CP021940.1	AR_0145	AR_0145_pla_tig00000209_1	111.5Kb	intact
NZ_CP021941.1	AR_0145	AR_0145_pla_tig00000217_1	28.5Kb	intact
NZ_CP021942.1	AR_0145	AR_0145_pla_tig00000218j2847_linear_1	76.6Kb	intact
NZ_CP021685.1	AR_0146	AR_0146_chr_5	49.1Kb	intact
NZ_CP021685.1	AR_0146	AR_0146_chr_6	37.5Kb	intact
NZ_CP021685.1	AR_0146	AR_0146_chr_7	45.9Kb	intact
NZ_CP021688.1	AR_0146	AR_0146_pla_tig00001189_2	19.7Kb	intact
NZ_CP021950.1	AR_0148	AR_0148_chr_3	44.5Kb	intact
NZ_CP021950.1	AR_0148	AR_0148_chr_4	50.9Kb	intact
NZ_CP021944.1	AR_0152	AR_0152_chr_1	56.2Kb	intact
NZ_CP021944.1	AR_0152	AR_0152_chr_3	41.3Kb	intact
NZ_CP021944.1	AR_0152	AR_0152_chr_4	57.1Kb	intact
NZ_CP021945.1	AR_0152	AR_0152_pla_tig00000194_1	111.8Kb	intact
NZ_CP021948.1	AR_0152	AR_0152_pla_tig00000214_1	28.8Kb	intact
NZ_CP021949.1	AR_0152	AR_0152_pla_tig00000216_u_1	80.9Kb	intact
NZ_CP028932.1	AR_0153	AR_0153_chr_1	63.1Kb	intact
NZ_CP021696.1	AR_0158	AR_0158_chr_2	64.1Kb	intact
NZ_CP021697.1	AR_0158	AR_0158_pla_tig00000161_2	33Kb	intact
NZ_CP021698.1	AR_0158	AR_0158_pla_tig00000183_1	42.9Kb	intact
NZ_CP032175.1	AR_0160	AR_0160_chr_3	37.3Kb	intact
NZ_CP032175.1	AR_0160	AR_0160_chr_4	56.2Kb	intact
NZ_CP032173.1	AR_0160	AR_0160_pla_unnamed1_2	22.2Kb	intact
NZ_CP027160.1	AR_0361	AR_0361_chr_2	37.5Kb	intact
NZ_CP027158.1	AR_0361	AR_0361_pla_unnamed2_1	38.7Kb	intact
NZ_CP027146.1	AR_0363	AR_0363_chr_1	69.2Kb	intact
NZ_CP027146.1	AR_0363	AR_0363_chr_8	56.9Kb	intact
NZ_CP027152.1	AR_0363	AR_0363_pla_unnamed1_2	26.3Kb	intact
NZ_CP027150.1	AR_0363	AR_0363_pla_unnamed3_1	39.4Kb	intact
NZ_CP027155.1	AR_0363	AR_0363_pla_unnamed6_1	41.6Kb	intact
NZ_CP030341.1	AR_362	AR_362_chr_2	48.1Kb	intact
NZ_CP030341.1	AR_362	AR_362_chr_3	48.8Kb	intact
NZ_CP030341.1	AR_362	AR_362_chr_5	56.9Kb	intact
NZ_CP030341.1	AR_362	AR_362_chr_6	37.5Kb	intact
NZ_CP030341.1	AR_362	AR_362_chr_7	50.9Kb	intact
NZ_CP030342.1	AR_362	AR_362_pla_unnamed2_2	38.7Kb	intact
NZ_CP015134.1	ATCC 35657	ATCC35657_chr_1	38.1Kb	intact
NZ_CP015134.1	ATCC 35657	ATCC35657_chr_4	44.2Kb	intact
NZ_CP015134.1	ATCC 35657	ATCC35657_chr_5	60Kb	intact
NZ_CP064352.1	ATCC 43816	ATCC_43816_chr_1	43.2Kb	intact
NZ_CP009208.1	ATCC 43816 KPPR1	ATCC_43816_KPPR1_chr_3	57Kb	intact
NZ_CP006659.2	ATCC BAA-2146	ATCC_BAA-2146_chr_1_2	49.1Kb	intact
NZ_CP006659.2	ATCC BAA-2146	ATCC_BAA-2146_chr_1_3	37.5Kb	intact
NZ_CP006659.2	ATCC BAA-2146	ATCC_BAA-2146_chr_1_6	45.6Kb	intact
NZ_CP006659.2	ATCC BAA-2146	ATCC_BAA-2146_chr_1_8	25.2Kb	intact
NZ_CP006659.2	ATCC BAA-2146	ATCC_BAA-2146_chr_1_9	58.8Kb	intact
NZ_CP006659.2	ATCC BAA-2146	ATCC_BAA-2146_chr_1_10	48.1Kb	intact
NZ_CP087272.1	ATCC BAA 2146	ATCC_BAA_2146_chr_2	48.1Kb	intact
NZ_CP087272.1	ATCC BAA 2146	ATCC_BAA_2146_chr_3	46.7Kb	intact
NZ_CP087272.1	ATCC BAA 2146	ATCC_BAA_2146_chr_5	9.2Kb	intact
NZ_CP087272.1	ATCC BAA 2146	ATCC_BAA_2146_chr_10	37.5Kb	intact
NZ_CP087272.1	ATCC BAA 2146	ATCC_BAA_2146_chr_11	50.9Kb	intact
NZ_CP025005.1	AUSMDU00003562	AUSMDU00003562_chr_3	49.8Kb	intact
NZ_CP025005.1	AUSMDU00003562	AUSMDU00003562_chr_5	56.9Kb	intact
NZ_CP025005.1	AUSMDU00003562	AUSMDU00003562_chr_6	50Kb	intact
NZ_CP025005.1	AUSMDU00003562	AUSMDU00003562_chr_7	48.6Kb	intact
NZ_CP025005.1	AUSMDU00003562	AUSMDU00003562_chr_8	37.5Kb	intact
NZ_CP025005.1	AUSMDU00003562	AUSMDU00003562_chr_9	52Kb	intact
NZ_CP025007.1	AUSMDU00003562	AUSMDU00003562_pla_pAUSMDU3562-2_1	19Kb	intact
NZ_CP022691.2	AUSMDU00008079	AUSMDU00008079_chr_3	48.9Kb	intact
NZ_CP022691.2	AUSMDU00008079	AUSMDU00008079_chr_5	56.9Kb	intact
NZ_CP022691.2	AUSMDU00008079	AUSMDU00008079_chr_6	69.7Kb	intact
NZ_CP022691.2	AUSMDU00008079	AUSMDU00008079_chr_7	38.7Kb	intact
NZ_CP022691.2	AUSMDU00008079	AUSMDU00008079_chr_8	50.9Kb	intact
NZ_CP022692.2	AUSMDU00008079	AUSMDU00008079_pla_pAUSMDU00008079_01_2	22.1Kb	intact
NZ_CP022693.2	AUSMDU00008079	AUSMDU00008079_pla_pAUSMDU00008079_02_1	38.7Kb	intact
NZ_CP025008.1	AUSMDU00008119	AUSMDU00008119_chr_3	47Kb	intact
NZ_CP025008.1	AUSMDU00008119	AUSMDU00008119_chr_5	56.9Kb	intact
NZ_CP025008.1	AUSMDU00008119	AUSMDU00008119_chr_6	69.4Kb	intact
NZ_CP025008.1	AUSMDU00008119	AUSMDU00008119_chr_7	37.5Kb	intact
NZ_CP025008.1	AUSMDU00008119	AUSMDU00008119_chr_8	50.9Kb	intact
NZ_CP025010.1	AUSMDU00008119	AUSMDU00008119_pla_pAUSMDU8119-2_1	43.3Kb	intact
NZ_CP086761.1	AZS099	AZS099_chr_2	50.2Kb	intact
NZ_CP086761.1	AZS099	AZS099_chr_3	50.5Kb	intact
NZ_CP086762.1	AZS099	AZS099_pla_pAZS099-NDM-IMP_1	20.7Kb	intact
NZ_CP086762.1	AZS099	AZS099_pla_pAZS099-NDM-IMP_2	9.7Kb	intact
NZ_CP072456.1	b1-2L	b1-2L_chr_2	40.8Kb	intact
NZ_CP072456.1	b1-2L	b1-2L_chr_3	65.5Kb	intact
NZ_CP072456.1	b1-2L	b1-2L_chr_5	70Kb	intact
NZ_CP072456.1	b1-2L	b1-2L_chr_6	47.1Kb	intact
NZ_CP072458.1	b1-2L	b1-2L_pla_pb1-2L-2_1	30.8Kb	intact
NZ_CP070445.1	B12097	B12097_chr_3	14.4Kb	intact
NZ_CP070445.1	B12097	B12097_chr_4	45.7Kb	intact
NZ_CP070445.1	B12097	B12097_chr_5	46.4Kb	intact
NZ_CP070446.1	B12097	B12097_pla_p1B12097_1	45.6Kb	intact
NZ_CP026155.1	B12(AN)	B12AN_chr_7	55.6Kb	intact
NZ_CP026155.1	B12(AN)	B12AN_chr_8	34.2Kb	intact
NZ_CP026155.1	B12(AN)	B12AN_chr_9	52.2Kb	intact
NZ_CP072403.1	B13243	B13243_chr_3	5.9Kb	intact
NZ_CP072403.1	B13243	B13243_chr_4	5.9Kb	intact
NZ_CP072403.1	B13243	B13243_chr_5	5.8Kb	intact
NZ_CP072403.1	B13243	B13243_chr_6	45.7Kb	intact
NZ_CP072403.1	B13243	B13243_chr_8	46.4Kb	intact
NZ_CP072404.1	B13243	B13243_pla_p1B13243_1	45.6Kb	intact
NZ_CP070415.1	B1347	B1347_chr_3	5.9Kb	intact
NZ_CP070415.1	B1347	B1347_chr_4	5.9Kb	intact
NZ_CP070415.1	B1347	B1347_chr_5	5.8Kb	intact
NZ_CP070415.1	B1347	B1347_chr_6	45.7Kb	intact
NZ_CP070415.1	B1347	B1347_chr_8	46.4Kb	intact
NZ_CP070416.1	B1347	B1347_pla_p1B1247_1	45.6Kb	intact
NZ_CP084168.1	B17602	B17602_chr_1	42.5Kb	intact
NZ_CP084168.1	B17602	B17602_chr_4	7.6Kb	intact
NZ_CP084169.1	B17602	B17602_pla_p1B17602_1	40.6Kb	intact
NZ_CP070449.1	B18064	B18064_chr_3	5.9Kb	intact
NZ_CP070449.1	B18064	B18064_chr_4	5.9Kb	intact
NZ_CP070449.1	B18064	B18064_chr_5	5.8Kb	intact
NZ_CP070449.1	B18064	B18064_chr_6	45.7Kb	intact
NZ_CP070449.1	B18064	B18064_chr_8	46.4Kb	intact
NZ_CP070450.1	B18064	B18064_pla_p1B18064_1	45.6Kb	intact
NZ_CP030741.1	B1	B1_chr_2	50.9Kb	intact
NZ_CP070459.1	B28484	B28484_chr_3	5.9Kb	intact
NZ_CP070459.1	B28484	B28484_chr_4	5.9Kb	intact
NZ_CP070459.1	B28484	B28484_chr_5	5.8Kb	intact
NZ_CP070459.1	B28484	B28484_chr_6	45.7Kb	intact
NZ_CP070459.1	B28484	B28484_chr_8	46.4Kb	intact
NZ_CP070460.1	B28484	B28484_pla_p1B28484_1	34.1Kb	intact
NZ_CP070464.1	B28906	B28906_chr_2	42.5Kb	intact
NZ_CP070464.1	B28906	B28906_chr_4	7.6Kb	intact
NZ_CP070465.1	B28906	B28906_pla_p1B28906_1	40.6Kb	intact
NZ_CP030733.1	B2	B2_chr_2	50.9Kb	intact
NZ_CP074580.1	B30155	B30155_chr_2	7.6Kb	intact
NZ_CP074580.1	B30155	B30155_chr_5	42.5Kb	intact
NZ_CP074581.1	B30155	B30155_pla_p1B30155_1	40.6Kb	intact
NZ_CP072413.1	B32278	B32278_chr_3	14.4Kb	intact
NZ_CP072413.1	B32278	B32278_chr_4	45.7Kb	intact
NZ_CP072413.1	B32278	B32278_chr_6	44.6Kb	intact
NZ_CP072414.1	B32278	B32278_pla_p1B32278_1	45.6Kb	intact
NZ_CP072422.1	B33769	B33769_chr_2	42.5Kb	intact
NZ_CP072422.1	B33769	B33769_chr_4	7.6Kb	intact
NZ_CP072423.1	B33769	B33769_pla_p1B33769_1	40.6Kb	intact
NZ_CP070425.1	B3824	B3824_chr_3	5.9Kb	intact
NZ_CP070425.1	B3824	B3824_chr_4	5.9Kb	intact
NZ_CP070425.1	B3824	B3824_chr_5	5.8Kb	intact
NZ_CP070425.1	B3824	B3824_chr_6	45.7Kb	intact
NZ_CP070425.1	B3824	B3824_chr_8	46.4Kb	intact
NZ_CP070426.1	B3824	B3824_pla_p1B3824_1	45.6Kb	intact
NZ_CP070430.1	B3923	B3923_chr_3	5.9Kb	intact
NZ_CP070430.1	B3923	B3923_chr_4	5.8Kb	intact
NZ_CP070430.1	B3923	B3923_chr_5	5.9Kb	intact
NZ_CP070430.1	B3923	B3923_chr_6	45.7Kb	intact
NZ_CP070430.1	B3923	B3923_chr_8	46.4Kb	intact
NZ_CP070431.1	B3923	B3923_pla_p1B3923_1	45.6Kb	intact
NZ_CP030728.1	B3	B3_pla_pKpnB3_1_1	66.7Kb	intact
NZ_CP110661.1	B431	B431_chr_1	39.3Kb	intact
NZ_CP110661.1	B431	B431_chr_2	54.2Kb	intact
NZ_CP072408.1	B4650	B4650_chr_3	5.9Kb	intact
NZ_CP072408.1	B4650	B4650_chr_4	5.9Kb	intact
NZ_CP072408.1	B4650	B4650_chr_5	5.8Kb	intact
NZ_CP072408.1	B4650	B4650_chr_6	45.7Kb	intact
NZ_CP072408.1	B4650	B4650_chr_8	46.4Kb	intact
NZ_CP072409.1	B4650	B4650_pla_p1B4650_1	45.6Kb	intact
NZ_CP030717.1	B4	B4_chr_2	50.9Kb	intact
NZ_CP072200.1	B5055	B5055_chr_1	50Kb	intact
NZ_CP072200.1	B5055	B5055_chr_2	30.4Kb	intact
NZ_CP072200.1	B5055	B5055_chr_4	33.1Kb	intact
NZ_CP072200.1	B5055	B5055_chr_5	48.9Kb	intact
NZ_CP070435.1	B5617	B5617_chr_2	37.4Kb	intact
NZ_CP070435.1	B5617	B5617_chr_3	72.3Kb	intact
NZ_CP070435.1	B5617	B5617_chr_4	58.3Kb	intact
NZ_CP070435.1	B5617	B5617_chr_5	38.3Kb	intact
NZ_CP070439.1	B5617	B5617_pla_p4B5617_1	111.1Kb	intact
NZ_CP067045.1	B6753	B6753_chr_4	40.6Kb	intact
NZ_CP067045.1	B6753	B6753_chr_5	53.1Kb	intact
NZ_CP067045.1	B6753	B6753_chr_6	39.2Kb	intact
NZ_CP067045.1	B6753	B6753_chr_8	36.2Kb	intact
NZ_CP067046.1	B6753	B6753_pla_pIncHI1B_vir_1	24.7Kb	intact
NZ_CP067370.1	B9122	B9122_chr_4	39.5Kb	intact
NZ_CP067370.1	B9122	B9122_chr_5	56.5Kb	intact
NZ_CP067371.1	B9122	B9122_pla_pIncFIBK_IncFIIK_2	27.8Kb	intact
NZ_CP067371.1	B9122	B9122_pla_pIncFIBK_IncFIIK_3	16Kb	intact
NZ_CP070410.1	B960	B960_chr_3	5.9Kb	intact
NZ_CP070410.1	B960	B960_chr_4	5.9Kb	intact
NZ_CP070410.1	B960	B960_chr_5	5.8Kb	intact
NZ_CP070410.1	B960	B960_chr_6	45.7Kb	intact
NZ_CP070410.1	B960	B960_chr_8	46.4Kb	intact
NZ_CP070411.1	B960	B960_pla_p1B960_1	45.6Kb	intact
NZ_CP053765.1	BA10835	BA10835_chr_4	51.8Kb	intact
NZ_CP054170.1	BA12818	BA12818_chr_2	48.9Kb	intact
NZ_CP054170.1	BA12818	BA12818_chr_4	38.5Kb	intact
NZ_CP102490.1	BA13643	BA13643_chr_3	36Kb	intact
NZ_CP102490.1	BA13643	BA13643_chr_4	37.8Kb	intact
NZ_CP102490.1	BA13643	BA13643_chr_6	27.7Kb	intact
NZ_CP036187.1	BA1559	BA1559_chr_2	41.6Kb	intact
NZ_CP036187.1	BA1559	BA1559_chr_3	41.8Kb	intact
NZ_CP036187.1	BA1559	BA1559_chr_4	45.2Kb	intact
NZ_CP036187.1	BA1559	BA1559_chr_5	50Kb	intact
NZ_CP036188.1	BA1559	BA1559_pla_pIncFIBK_3	65.5Kb	intact
NZ_CP060421.1	BA2105	BA2105_chr_2	39.9Kb	intact
NZ_CP060421.1	BA2105	BA2105_chr_4	25.3Kb	intact
NZ_CP060421.1	BA2105	BA2105_chr_5	48.1Kb	intact
NZ_CP060421.1	BA2105	BA2105_chr_6	53.1Kb	intact
NZ_CP060421.1	BA2105	BA2105_chr_8	57.3Kb	intact
NZ_CP060421.1	BA2105	BA2105_chr_9	36.2Kb	intact
NZ_CP053364.1	BA2275	BA2275_chr_2	61.2Kb	intact
NZ_CP053364.1	BA2275	BA2275_chr_3	54.2Kb	intact
NZ_CP053364.1	BA2275	BA2275_chr_4	51.2Kb	intact
NZ_CP053364.1	BA2275	BA2275_chr_8	48.8Kb	intact
NZ_CP053364.1	BA2275	BA2275_chr_9	30.2Kb	intact
NZ_CP053364.1	BA2275	BA2275_chr_10	33.2Kb	intact
NZ_CP053365.1	BA2275	BA2275_pla_p1_4	33.6Kb	intact
NZ_CP053366.1	BA2275	BA2275_pla_p2_1	39.3Kb	intact
NZ_CP059468.1	BA25665	BA25665_chr_1	37.3Kb	intact
NZ_CP059468.1	BA25665	BA25665_chr_2	33.6Kb	intact
NZ_CP059468.1	BA25665	BA25665_chr_3	49.3Kb	intact
NZ_CP059468.1	BA25665	BA25665_chr_5	42.4Kb	intact
NZ_CP036327.1	BA28434	BA28434_chr_1	9.2Kb	intact
NZ_CP036327.1	BA28434	BA28434_chr_3	14.2Kb	intact
NZ_CP036327.1	BA28434	BA28434_chr_4	45.7Kb	intact
NZ_CP036327.1	BA28434	BA28434_chr_6	50.4Kb	intact
NZ_CP036327.1	BA28434	BA28434_chr_7	48Kb	intact
NZ_CP036330.1	BA28434	BA28434_pla_punnamed_1_VBA28434_1	47Kb	intact
NZ_CP067372.1	BA30371	BA30371_chr_2	60.7Kb	intact
NZ_CP067372.1	BA30371	BA30371_chr_3	37.2Kb	intact
NZ_CP067372.1	BA30371	BA30371_chr_4	33.9Kb	intact
NZ_CP067373.1	BA30371	BA30371_pla_pIncFIBK_IncFIIK_2	37.6Kb	intact
NZ_CP035179.1	BA33875	BA33875_chr_2	67.3Kb	intact
NZ_CP035179.1	BA33875	BA33875_chr_3	40.2Kb	intact
NZ_CP035179.1	BA33875	BA33875_chr_4	47.3Kb	intact
NZ_CP035179.1	BA33875	BA33875_chr_6	65.3Kb	intact
NZ_CP035179.1	BA33875	BA33875_chr_8	46.7Kb	intact
NZ_CP036190.1	BA34918	BA34918_chr_1	57.6Kb	intact
NZ_CP036190.1	BA34918	BA34918_chr_4	34.6Kb	intact
NZ_CP036190.1	BA34918	BA34918_chr_5	51.9Kb	intact
NZ_CP036190.1	BA34918	BA34918_chr_6	57.8Kb	intact
NZ_CP036194.1	BA34918	BA34918_pla_pIncFIB_1	105.9Kb	intact
NZ_CP058940.1	BA39649	BA39649_chr_1	34.3Kb	intact
NZ_CP058940.1	BA39649	BA39649_chr_2	49.7Kb	intact
NZ_CP058940.1	BA39649	BA39649_chr_4	49.1Kb	intact
NZ_CP058940.1	BA39649	BA39649_chr_6	60.9Kb	intact
NZ_CP058940.1	BA39649	BA39649_chr_7	69.6Kb	intact
NZ_CP058940.1	BA39649	BA39649_chr_9	38.3Kb	intact
NZ_CP058940.1	BA39649	BA39649_chr_10	45.7Kb	intact
NZ_CP058944.1	BA39649	BA39649_pla_p_unnamed_1_VBA39649_1	50.6Kb	intact
NZ_CP035905.1	BA4656	BA4656_chr_2	57.8Kb	intact
NZ_CP035905.1	BA4656	BA4656_chr_3	53.1Kb	intact
NZ_CP035905.1	BA4656	BA4656_chr_4	33.1Kb	intact
NZ_CP035905.1	BA4656	BA4656_chr_7	48.4Kb	intact
NZ_CP035908.1	BA4656	BA4656_pla_pIncAC2_1	24.2Kb	intact
NZ_CP035906.1	BA4656	BA4656_pla_unnamed1_1	33.9Kb	intact
NZ_CP035909.1	BA4656	BA4656_pla_unnamed2_1	107Kb	intact
NZ_CP083932.1	BA4946	BA4946_chr_4	49.2Kb	intact
NZ_CP092765.1	bat15	bat15_chr_3	48.6Kb	intact
NZ_CP092765.1	bat15	bat15_chr_5	56.9Kb	intact
NZ_CP092765.1	bat15	bat15_chr_6	37.5Kb	intact
NZ_CP092765.1	bat15	bat15_chr_7	50.9Kb	intact
NZ_CP092766.1	bat15	bat15_pla_unnamed1_2	20.9Kb	intact
NZ_CP092766.1	bat15	bat15_pla_unnamed1_3	25.8Kb	intact
NZ_CP092767.1	bat15	bat15_pla_unnamed2_1	50.1Kb	intact
NZ_CP092768.1	bat15	bat15_pla_unnamed3_1	105.9Kb	intact
NZ_CP092759.1	bat16	bat16_chr_3	48.6Kb	intact
NZ_CP092759.1	bat16	bat16_chr_5	56.9Kb	intact
NZ_CP092759.1	bat16	bat16_chr_6	37.5Kb	intact
NZ_CP092759.1	bat16	bat16_chr_7	50.9Kb	intact
NZ_CP092760.1	bat16	bat16_pla_unnamed1_1	19.8Kb	intact
NZ_CP092760.1	bat16	bat16_pla_unnamed1_4	20.9Kb	intact
NZ_CP092761.1	bat16	bat16_pla_unnamed2_1	50.1Kb	intact
NZ_CP092762.1	bat16	bat16_pla_unnamed3_1	105.9Kb	intact
NZ_CP092763.1	bat16	bat16_pla_unnamed4_1	27.5Kb	intact
NZ_CP092753.1	bat17	bat17_chr_3	48.6Kb	intact
NZ_CP092753.1	bat17	bat17_chr_5	56.9Kb	intact
NZ_CP092753.1	bat17	bat17_chr_6	37.5Kb	intact
NZ_CP092753.1	bat17	bat17_chr_7	50.9Kb	intact
NZ_CP092754.1	bat17	bat17_pla_unnamed1_3	20.4Kb	intact
NZ_CP092754.1	bat17	bat17_pla_unnamed1_4	31.6Kb	intact
NZ_CP092755.1	bat17	bat17_pla_unnamed2_1	19.9Kb	intact
NZ_CP092756.1	bat17	bat17_pla_unnamed3_1	105.9Kb	intact
NZ_OV754010.1	BB1541	BB1541_chr_BB1541_2	38.3Kb	intact
NZ_OV754010.1	BB1541	BB1541_chr_BB1541_4	47.7Kb	intact
NZ_OV754011.1	BB1541	BB1541_pla_BB1541_1_1	16.6Kb	intact
NZ_OV753987.1	BB1542	BB1542_chr_BB1542_2	38.3Kb	intact
NZ_OV753987.1	BB1542	BB1542_chr_BB1542_4	47.7Kb	intact
NZ_OV753988.1	BB1542	BB1542_pla_BB1542_1_1	16.6Kb	intact
NZ_CP050834.1	Bckp021	Bckp021_chr_1	63.2Kb	intact
NZ_CP050834.1	Bckp021	Bckp021_chr_2	35.2Kb	intact
NZ_CP050834.1	Bckp021	Bckp021_chr_3	43.3Kb	intact
NZ_CP050834.1	Bckp021	Bckp021_chr_4	53.3Kb	intact
NZ_CP050834.1	Bckp021	Bckp021_chr_6	44.6Kb	intact
NZ_CP050836.1	Bckp021	Bckp021_pla_pBckp021-2_2	20.7Kb	intact
NZ_CP050829.1	Bckp067	Bckp067_chr_1	39Kb	intact
NZ_CP050829.1	Bckp067	Bckp067_chr_5	56.4Kb	intact
NZ_CP050830.1	Bckp067	Bckp067_pla_pBckp067_1	14.5Kb	intact
NZ_CP050822.1	Bckp091	Bckp091_chr_2	47.4Kb	intact
NZ_CP050840.1	Bckp101	Bckp101_chr_4	36.7Kb	intact
NZ_CP050840.1	Bckp101	Bckp101_chr_5	22.1Kb	intact
NZ_CP050843.1	Bckp186	Bckp186_chr_1	39.8Kb	intact
NZ_CP050843.1	Bckp186	Bckp186_chr_3	59.5Kb	intact
NZ_CP050843.1	Bckp186	Bckp186_chr_4	56.4Kb	intact
NZ_CP050843.1	Bckp186	Bckp186_chr_5	35.5Kb	intact
NZ_CP050843.1	Bckp186	Bckp186_chr_6	45.5Kb	intact
NZ_CP050844.1	Bckp186	Bckp186_pla_pBckp186_1	15.6Kb	intact
NZ_CP050844.1	Bckp186	Bckp186_pla_pBckp186_4	19.2Kb	intact
NZ_CP050845.1	Bckp206	Bckp206_chr_2	70.9Kb	intact
NZ_CP050826.1	Bckp212	Bckp212_chr_3	71.3Kb	intact
NZ_CP050826.1	Bckp212	Bckp212_chr_4	38.5Kb	intact
NZ_CP082978.1	BD-13	BD-13_chr_1	64.6Kb	intact
NZ_CP082978.1	BD-13	BD-13_chr_3	46.7Kb	intact
NZ_CP082978.1	BD-13	BD-13_chr_4	47.7Kb	intact
NZ_CP082978.1	BD-13	BD-13_chr_5	41Kb	intact
NZ_CP082978.1	BD-13	BD-13_chr_6	52.1Kb	intact
NZ_CP082978.1	BD-13	BD-13_chr_8	46.6Kb	intact
NZ_CP082975.1	BD-14	BD-14_chr_3	72.4Kb	intact
NZ_CP082975.1	BD-14	BD-14_chr_4	37.5Kb	intact
NZ_CP082975.1	BD-14	BD-14_chr_5	38.9Kb	intact
NZ_CP082975.1	BD-14	BD-14_chr_7	49.6Kb	intact
NZ_CP082976.1	BD-14	BD-14_pla_p1-BD-14-NDM1_2	14.8Kb	intact
NZ_CP082967.1	BD-41	BD-41_chr_2	65.8Kb	intact
NZ_CP082967.1	BD-41	BD-41_chr_3	46.7Kb	intact
NZ_CP082967.1	BD-41	BD-41_chr_4	47.7Kb	intact
NZ_CP082967.1	BD-41	BD-41_chr_5	41Kb	intact
NZ_CP082967.1	BD-41	BD-41_chr_6	53.5Kb	intact
NZ_CP082968.1	BD-41	BD-41_pla_p1-BD-41_2	33.5Kb	intact
NZ_CP046939.1	BD_DM_697	BD_DM_697_chr_2	48.1Kb	intact
NZ_CP046939.1	BD_DM_697	BD_DM_697_chr_3	40.2Kb	intact
NZ_CP046939.1	BD_DM_697	BD_DM_697_chr_4	37.8Kb	intact
NZ_CP046939.1	BD_DM_697	BD_DM_697_chr_5	57.5Kb	intact
NZ_CP046941.1	BD_DM_697	BD_DM_697_pla_punnamed2_1	148.3Kb	intact
NZ_CP046381.1	BD_DM_782	BD_DM_782_chr_2	48.1Kb	intact
NZ_CP046381.1	BD_DM_782	BD_DM_782_chr_3	40.2Kb	intact
NZ_CP046381.1	BD_DM_782	BD_DM_782_chr_4	37.8Kb	intact
NZ_CP046381.1	BD_DM_782	BD_DM_782_chr_5	57.5Kb	intact
NZ_CP046383.1	BD_DM_782	BD_DM_782_pla_punnamed2_1	148.3Kb	intact
NZ_CP046949.1	BD_DM_914	BD_DM_914_chr_2	48.1Kb	intact
NZ_CP046949.1	BD_DM_914	BD_DM_914_chr_4	40.2Kb	intact
NZ_CP046949.1	BD_DM_914	BD_DM_914_chr_5	37.8Kb	intact
NZ_CP046949.1	BD_DM_914	BD_DM_914_chr_6	57.5Kb	intact
NZ_CP046951.1	BD_DM_914	BD_DM_914_pla_punnamed2_1	148.3Kb	intact
NZ_CP065453.1	Beach Ranger	Beach_Ranger_chr_1	59.1Kb	intact
NZ_CP065453.1	Beach Ranger	Beach_Ranger_chr_2	48.1Kb	intact
NZ_CP065453.1	Beach Ranger	Beach_Ranger_chr_7	30.3Kb	intact
NZ_CP065453.1	Beach Ranger	Beach_Ranger_chr_8	47.8Kb	intact
NZ_CP065453.1	Beach Ranger	Beach_Ranger_chr_9	45.6Kb	intact
NZ_CP022573.1	BIC-1	BIC-1_chr_1	56.9Kb	intact
NZ_CP022573.1	BIC-1	BIC-1_chr_2	59.8Kb	intact
NZ_CP022573.1	BIC-1	BIC-1_chr_3	37.5Kb	intact
NZ_CP022573.1	BIC-1	BIC-1_chr_4	50.9Kb	intact
NZ_CP022573.1	BIC-1	BIC-1_chr_9	46.9Kb	intact
NZ_CP096811.1	Bio19	Bio19_pla_pBio19_3	27.5Kb	intact
NZ_CP093856.1	Bio30	Bio30_chr_3	43.2Kb	intact
NZ_CP093856.1	Bio30	Bio30_chr_4	64.2Kb	intact
NZ_CP093857.1	Bio30	Bio30_pla_pBio30_2	34.2Kb	intact
NZ_CP094227.1	Bio3	Bio3_chr_1	60.2Kb	intact
NZ_CP094227.1	Bio3	Bio3_chr_4	37.3Kb	intact
NZ_CP094227.1	Bio3	Bio3_chr_7	75.6Kb	intact
NZ_CP093854.1	Bio45	Bio45_chr_2	43.1Kb	intact
NZ_CP093854.1	Bio45	Bio45_chr_5	37.3Kb	intact
NZ_CP093854.1	Bio45	Bio45_chr_8	57.7Kb	intact
NZ_CP093852.1	Bio73	Bio73_chr_1	52.2Kb	intact
NZ_CP093852.1	Bio73	Bio73_chr_7	37.3Kb	intact
NZ_CP093852.1	Bio73	Bio73_chr_10	63.2Kb	intact
NZ_CP082212.1	BJ20	BJ20_chr_1	31.3Kb	intact
NZ_CP082212.1	BJ20	BJ20_chr_3	39.3Kb	intact
NZ_CP082212.1	BJ20	BJ20_chr_5	61.3Kb	intact
NZ_CP082212.1	BJ20	BJ20_chr_6	53.7Kb	intact
NZ_CP082212.1	BJ20	BJ20_chr_8	57.8Kb	intact
NZ_CP082212.1	BJ20	BJ20_chr_9	29.9Kb	intact
NZ_CP034123.1	BJCFK909	BJCFK909_chr_2	61.3Kb	intact
NZ_CP034123.1	BJCFK909	BJCFK909_chr_3	50.9Kb	intact
NZ_CP034123.1	BJCFK909	BJCFK909_chr_5	58.1Kb	intact
NZ_CP034123.1	BJCFK909	BJCFK909_chr_9	66.9Kb	intact
NZ_CP034123.1	BJCFK909	BJCFK909_chr_10	37.5Kb	intact
NZ_CP034124.1	BJCFK909	BJCFK909_pla_p1b1_1	18.3Kb	intact
NZ_CP020837.1	BK13043	BK13043_chr_3	49.1Kb	intact
NZ_CP020837.1	BK13043	BK13043_chr_4	37.5Kb	intact
NZ_CP020837.1	BK13043	BK13043_chr_5	61Kb	intact
NZ_CP020837.1	BK13043	BK13043_chr_7	45Kb	intact
NZ_CP020837.1	BK13043	BK13043_chr_10	57.6Kb	intact
NZ_CP020837.1	BK13043	BK13043_chr_11	48.1Kb	intact
NZ_CP045015.1	BK13048	BK13048_chr_2	40Kb	intact
NZ_CP045015.1	BK13048	BK13048_chr_4	69.1Kb	intact
NZ_CP045015.1	BK13048	BK13048_chr_5	38.3Kb	intact
NZ_CP045015.1	BK13048	BK13048_chr_6	48.7Kb	intact
NZ_CP045018.1	BK13048	BK13048_pla_pBK13048-3_1	51.1Kb	intact
NZ_CP009114.1	blaNDM-1	blaNDM-1_chr_1	37.2Kb	intact
NZ_CP009114.1	blaNDM-1	blaNDM-1_chr_3	43.7Kb	intact
NZ_CP009114.1	blaNDM-1	blaNDM-1_chr_6	31.9Kb	intact
NZ_CP015822.1	blood sample 2	blood_sample_2_chr_1	63.3Kb	intact
NZ_CP015822.1	blood sample 2	blood_sample_2_chr_3	46.2Kb	intact
NZ_CP015822.1	blood sample 2	blood_sample_2_chr_5	57.5Kb	intact
NZ_CP015822.1	blood sample 2	blood_sample_2_chr_6	48.1Kb	intact
NZ_CP015822.1	blood sample 2	blood_sample_2_chr_10	49.1Kb	intact
NZ_CP015822.1	blood sample 2	blood_sample_2_chr_11	37.5Kb	intact
NZ_CP015823.1	blood sample 2	blood_sample_2_pla_1_2	20.9Kb	intact
NZ_CP063906.1	BM327-1	BM327-1_chr_1	32.1Kb	intact
NZ_CP063906.1	BM327-1	BM327-1_chr_4	65.5Kb	intact
NZ_CP063904.1	BM334-2	BM334-2_chr_1	79.9Kb	intact
NZ_CP063904.1	BM334-2	BM334-2_chr_2	30Kb	intact
NZ_CP063904.1	BM334-2	BM334-2_chr_4	38.4Kb	intact
NZ_CP063904.1	BM334-2	BM334-2_chr_5	47.4Kb	intact
NZ_CP063913.1	BM336-2-1	BM336-2-1_chr_1	24.7Kb	intact
NZ_CP063913.1	BM336-2-1	BM336-2-1_chr_2	51.8Kb	intact
NZ_CP063913.1	BM336-2-1	BM336-2-1_chr_3	46Kb	intact
NZ_CP063913.1	BM336-2-1	BM336-2-1_chr_4	38.9Kb	intact
NZ_CP063913.1	BM336-2-1	BM336-2-1_chr_5	53.6Kb	intact
NZ_CP063913.1	BM336-2-1	BM336-2-1_chr_6	35.6Kb	intact
NZ_CP063919.1	BM337-1	BM337-1_chr_2	65.5Kb	intact
NZ_CP063919.1	BM337-1	BM337-1_chr_3	33.5Kb	intact
NZ_CP063922.1	BM338-1	BM338-1_chr_1	40.8Kb	intact
NZ_CP063922.1	BM338-1	BM338-1_chr_2	25.5Kb	intact
NZ_CP063922.1	BM338-1	BM338-1_chr_4	34.5Kb	intact
NZ_CP063922.1	BM338-1	BM338-1_chr_5	55.8Kb	intact
NZ_CP063939.1	BM343	BM343_chr_1	34.5Kb	intact
NZ_CP063939.1	BM343	BM343_chr_3	40.8Kb	intact
NZ_CP063939.1	BM343	BM343_chr_5	39.7Kb	intact
NZ_CP063939.1	BM343	BM343_chr_7	46.5Kb	intact
NZ_CP063940.1	BM343	BM343_pla_pBM343.1_1	22.5Kb	intact
NZ_CP095776.1	bo714	bo714_chr_2	49.1Kb	intact
NZ_CP095776.1	bo714	bo714_chr_4	50Kb	intact
NZ_CP095776.1	bo714	bo714_chr_7	56.9Kb	intact
NZ_CP095776.1	bo714	bo714_chr_8	29.8Kb	intact
NZ_CP095778.1	bo714	bo714_pla_p112Kb_1	28.9Kb	intact
NZ_CP095777.1	bo714	bo714_pla_p363Kb_4	24.3Kb	intact
NZ_CP036335.1	BP327	BP327_chr_1	41.6Kb	intact
NZ_CP036335.1	BP327	BP327_chr_2	57.1Kb	intact
NZ_CP036335.1	BP327	BP327_chr_3	37.8Kb	intact
NZ_CP036335.1	BP327	BP327_chr_4	50Kb	intact
NZ_CP053771.1	BP3636	BP3636_chr_2	39.5Kb	intact
NZ_CP053771.1	BP3636	BP3636_chr_4	49.2Kb	intact
NZ_CP018885.1	BR21	BR21_chr_1	69.9Kb	intact
NZ_CP018885.1	BR21	BR21_chr_2	49.3Kb	intact
NZ_CP018885.1	BR21	BR21_chr_7	37.5Kb	intact
NZ_CP018885.1	BR21	BR21_chr_8	62.1Kb	intact
NZ_CP018885.1	BR21	BR21_chr_10	43.7Kb	intact
NZ_CP018883.1	BR7	BR7_chr_1	55.6Kb	intact
NZ_CP018883.1	BR7	BR7_chr_3	61.3Kb	intact
NZ_CP018883.1	BR7	BR7_chr_4	37.5Kb	intact
NZ_CP018883.1	BR7	BR7_chr_8	48.1Kb	intact
NZ_CP015990.1	BR	BR_chr_5	37.8Kb	intact
NZ_CP015991.1	BR	BR_pla_pWSZBR_2	31.7Kb	intact
NZ_CP063934.1	BS326-3	BS326-3_chr_2	32.1Kb	intact
NZ_CP063934.1	BS326-3	BS326-3_chr_3	26.8Kb	intact
NZ_CP063943.1	BS329-2	BS329-2_chr_2	32.1Kb	intact
NZ_CP063943.1	BS329-2	BS329-2_chr_3	31.1Kb	intact
NZ_CP063885.1	BS361-1	BS361-1_chr_1	26.6Kb	intact
NZ_CP063885.1	BS361-1	BS361-1_chr_6	65.5Kb	intact
NZ_CP063890.1	BS433-2	BS433-2_chr_2	58.4Kb	intact
NZ_CP063890.1	BS433-2	BS433-2_chr_3	56.7Kb	intact
NZ_CP063890.1	BS433-2	BS433-2_chr_5	34.6Kb	intact
NZ_CP106906.1	BSIKPN-11	BSIKPN-11_chr_2	60.8Kb	intact
NZ_CP106906.1	BSIKPN-11	BSIKPN-11_chr_3	53.9Kb	intact
NZ_CP106906.1	BSIKPN-11	BSIKPN-11_chr_5	56.8Kb	intact
NZ_CP106906.1	BSIKPN-11	BSIKPN-11_chr_8	40.3Kb	intact
NZ_CP106906.1	BSIKPN-11	BSIKPN-11_chr_9	44.3Kb	intact
NZ_CP106906.1	BSIKPN-11	BSIKPN-11_chr_10	37.5Kb	intact
NZ_CP106907.1	BSIKPN-11	BSIKPN-11_pla_unnamed1_1	26.4Kb	intact
NZ_CP106907.1	BSIKPN-11	BSIKPN-11_pla_unnamed1_3	94.9Kb	intact
NZ_CP106912.1	BSIKPN-9	BSIKPN-9_chr_2	60.8Kb	intact
NZ_CP106912.1	BSIKPN-9	BSIKPN-9_chr_3	53.9Kb	intact
NZ_CP106912.1	BSIKPN-9	BSIKPN-9_chr_5	56.8Kb	intact
NZ_CP106912.1	BSIKPN-9	BSIKPN-9_chr_8	40.3Kb	intact
NZ_CP106912.1	BSIKPN-9	BSIKPN-9_chr_9	45.5Kb	intact
NZ_CP106912.1	BSIKPN-9	BSIKPN-9_chr_10	37.5Kb	intact
NZ_CP106915.1	BSIKPN-9	BSIKPN-9_pla_unnamed3_3	36.3Kb	intact
NZ_CP106916.1	BSIKPN-9	BSIKPN-9_pla_unnamed4_1	88.1Kb	intact
NZ_CP066543.1	BTS	BTS_chr_4	37.5Kb	intact
NZ_CP066543.1	BTS	BTS_chr_6	32.6Kb	intact
NZ_CP066543.1	BTS	BTS_chr_8	55.1Kb	intact
NZ_CP066543.1	BTS	BTS_chr_9	54.3Kb	intact
NZ_CP066544.1	BTS	BTS_pla_pBTS_02_1	23.5Kb	intact
NZ_CP020498.1	BWHC1	BWHC1_chr_4	37.5Kb	intact
NZ_CP020498.1	BWHC1	BWHC1_chr_5	50.9Kb	intact
NZ_CP020499.1	BWHC1	BWHC1_pla_unnamed1_1	19.2Kb	intact
NZ_CP020500.1	BWHC1	BWHC1_pla_unnamed2_2	34.8Kb	intact
NZ_CP061832.1	C0674	C0674_chr_3	40.6Kb	intact
NZ_CP061832.1	C0674	C0674_chr_5	34Kb	intact
NZ_CP061832.1	C0674	C0674_chr_6	48.1Kb	intact
NZ_CP061833.1	C0674	C0674_pla_p1423_1_1	42.1Kb	intact
NZ_CP084104.1	C11	C11_pla_pC11-215kb_1	20.7Kb	intact
NZ_CP084104.1	C11	C11_pla_pC11-215kb_3	49.7Kb	intact
NZ_CP080584.1	C1398 mutant C1	C1398_chr_2	61.3Kb	intact
NZ_CP080584.1	C1398 mutant C1	C1398_chr_3	53.9Kb	intact
NZ_CP080584.1	C1398 mutant C1	C1398_chr_5	56.8Kb	intact
NZ_CP080584.1	C1398 mutant C1	C1398_chr_8	41.5Kb	intact
NZ_CP080584.1	C1398 mutant C1	C1398_chr_9	45.5Kb	intact
NZ_CP080584.1	C1398 mutant C1	C1398_chr_10	37.5Kb	intact
NZ_CP061359.1	C20	C20_chr_2	42.8Kb	intact
NZ_CP061359.1	C20	C20_chr_5	63.2Kb	intact
NZ_CP061360.1	C20	C20_pla_pC20-394kb_4	22.9Kb	intact
NZ_CP061360.1	C20	C20_pla_pC20-394kb_7	12.6Kb	intact
NZ_CP061360.1	C20	C20_pla_pC20-394kb_8	19.1Kb	intact
NZ_CP071464.1	C2244	C2244_chr_2	51.1Kb	intact
NZ_CP071464.1	C2244	C2244_chr_3	53.9Kb	intact
NZ_CP071464.1	C2244	C2244_chr_5	58.7Kb	intact
NZ_CP071464.1	C2244	C2244_chr_7	40.3Kb	intact
NZ_CP071464.1	C2244	C2244_chr_8	48.5Kb	intact
NZ_CP071464.1	C2244	C2244_chr_9	38.7Kb	intact
NZ_CP039819.1	C2414	C2414_chr_10	61.3Kb	intact
NZ_CP039819.1	C2414	C2414_chr_11	54.9Kb	intact
NZ_CP039819.1	C2414	C2414_chr_13	62.6Kb	intact
NZ_CP039819.1	C2414	C2414_chr_16	33.4Kb	intact
NZ_CP039819.1	C2414	C2414_chr_17	29.9Kb	intact
NZ_CP039808.1	C2660	C2660_chr_3	51.1Kb	intact
NZ_CP039808.1	C2660	C2660_chr_4	53.9Kb	intact
NZ_CP039808.1	C2660	C2660_chr_6	58.1Kb	intact
NZ_CP039808.1	C2660	C2660_chr_9	40.3Kb	intact
NZ_CP039808.1	C2660	C2660_chr_10	37.1Kb	intact
NZ_CP039808.1	C2660	C2660_chr_11	40.6Kb	intact
NZ_CP039810.1	C2660	C2660_pla_pC2660-3-KPC_1	25Kb	intact
NZ_CP042520.1	C2	C2_chr_1	60.3Kb	intact
NZ_CP042520.1	C2	C2_chr_2	43.5Kb	intact
NZ_CP042520.1	C2	C2_chr_3	50.6Kb	intact
NZ_CP061700.1	C39	C39_chr_2	41Kb	intact
NZ_CP061700.1	C39	C39_chr_3	38.7Kb	intact
NZ_CP061701.1	C39	C39_pla_pC39-334kb_1	30.2Kb	intact
NZ_CP042481.1	C51	C51_chr_2	43.9Kb	intact
NZ_CP042481.1	C51	C51_chr_3	55.4Kb	intact
NZ_CP042482.1	C51	C51_pla_pC51_001_3	22.9Kb	intact
NZ_CP042483.1	C51	C51_pla_pC51_002_2	20.2Kb	intact
NZ_CP034415.1	C789	C789_chr_2	61.3Kb	intact
NZ_CP034415.1	C789	C789_chr_3	53.9Kb	intact
NZ_CP034415.1	C789	C789_chr_5	56.8Kb	intact
NZ_CP034415.1	C789	C789_chr_9	69.9Kb	intact
NZ_CP034415.1	C789	C789_chr_10	37.5Kb	intact
NZ_CP017934.1	CAV1016	CAV1016_chr_2	38.4Kb	intact
NZ_CP017934.1	CAV1016	CAV1016_chr_3	36.8Kb	intact
NZ_CP017934.1	CAV1016	CAV1016_chr_4	40.8Kb	intact
NZ_CP017934.1	CAV1016	CAV1016_chr_6	37.4Kb	intact
NZ_CP017934.1	CAV1016	CAV1016_chr_7	41.7Kb	intact
NZ_CP018671.1	CAV1042	CAV1042_chr_4	16.3Kb	intact
NZ_CP018671.1	CAV1042	CAV1042_chr_8	41.6Kb	intact
NZ_CP018671.1	CAV1042	CAV1042_chr_9	37.6Kb	intact
NZ_CP018670.1	CAV1042	CAV1042_pla_pCAV1042-183_1	29.4Kb	intact
NZ_CP013322.1	CAV1193	CAV1193_chr_2	50.4Kb	intact
NZ_CP013322.1	CAV1193	CAV1193_chr_5	29Kb	intact
NZ_CP013322.1	CAV1193	CAV1193_chr_6	38.3Kb	intact
NZ_CP013322.1	CAV1193	CAV1193_chr_7	44.9Kb	intact
NZ_CP013322.1	CAV1193	CAV1193_chr_8	30.7Kb	intact
NZ_CP013322.1	CAV1193	CAV1193_chr_9	20.1Kb	intact
NZ_CP013323.1	CAV1193	CAV1193_pla_pCAV1193-258_1	26.3Kb	intact
NZ_CP018676.1	CAV1217	CAV1217_chr_2	50.3Kb	intact
NZ_CP018676.1	CAV1217	CAV1217_chr_7	18.6Kb	intact
NZ_CP018676.1	CAV1217	CAV1217_chr_9	37.5Kb	intact
NZ_CP018676.1	CAV1217	CAV1217_chr_10	45Kb	intact
NZ_CP018676.1	CAV1217	CAV1217_chr_11	61.9Kb	intact
NZ_CP011624.1	CAV1344	CAV1344_chr_2	50.4Kb	intact
NZ_CP011624.1	CAV1344	CAV1344_chr_5	29Kb	intact
NZ_CP011624.1	CAV1344	CAV1344_chr_7	44.9Kb	intact
NZ_CP011624.1	CAV1344	CAV1344_chr_8	30.7Kb	intact
NZ_CP011624.1	CAV1344	CAV1344_chr_9	20.1Kb	intact
NZ_CP011623.1	CAV1344	CAV1344_pla_pCAV1344-250_1	21.4Kb	intact
NZ_CP011578.1	CAV1392	CAV1392_chr_1	54Kb	intact
NZ_CP011578.1	CAV1392	CAV1392_chr_7	48.3Kb	intact
NZ_CP011578.1	CAV1392	CAV1392_chr_8	37.5Kb	intact
NZ_CP011576.1	CAV1392	CAV1392_pla_pCAV1392-50_1	48.6Kb	intact
NZ_CP018352.1	CAV1417	CAV1417_chr_2	73.5Kb	intact
NZ_CP018352.1	CAV1417	CAV1417_chr_3	56.9Kb	intact
NZ_CP018352.1	CAV1417	CAV1417_chr_5	37.5Kb	intact
NZ_CP018352.1	CAV1417	CAV1417_chr_10	50.3Kb	intact
NZ_CP018352.1	CAV1417	CAV1417_chr_11	43.3Kb	intact
NZ_CP018351.1	CAV1417	CAV1417_pla_pCAV1417-185_1	31.6Kb	intact
NZ_CP018356.1	CAV1453	CAV1453_chr_2	37.5Kb	intact
NZ_CP018356.1	CAV1453	CAV1453_chr_3	44.1Kb	intact
NZ_CP018356.1	CAV1453	CAV1453_chr_4	45Kb	intact
NZ_CP018356.1	CAV1453	CAV1453_chr_6	54.4Kb	intact
NZ_CP011647.1	CAV1596	CAV1596_chr_4	50.4Kb	intact
NZ_CP011647.1	CAV1596	CAV1596_chr_5	37.5Kb	intact
NZ_CP011647.1	CAV1596	CAV1596_chr_6	45Kb	intact
NZ_CP011647.1	CAV1596	CAV1596_chr_8	48.1Kb	intact
NZ_CP035540.1	CCRI-22199	CCRI-22199_chr_3	62.6Kb	intact
NZ_CP035540.1	CCRI-22199	CCRI-22199_chr_5	39.4Kb	intact
NZ_CP035540.1	CCRI-22199	CCRI-22199_chr_6	50.9Kb	intact
NZ_CP035537.1	CCRI-22199	CCRI-22199_pla_pKp199-2_2	21.1Kb	intact
NZ_CP023249.1	CCUG 70742	CCUG70742_chr_2	46.1Kb	intact
NZ_CP023249.1	CCUG 70742	CCUG70742_chr_3	48Kb	intact
NZ_CP022611.1	CDC 0106	CDC0106_chr_1	53.4Kb	intact
NZ_CP022611.1	CDC 0106	CDC0106_chr_2	37.3Kb	intact
NZ_CP022611.1	CDC 0106	CDC0106_chr_4	40.1Kb	intact
NZ_CP022611.1	CDC 0106	CDC0106_chr_6	49.2Kb	intact
NZ_CP022612.1	CDC 0106	CDC0106_pla_unnamed1_5	48.8Kb	intact
NZ_CP077779.1	CDI231	CDI231_chr_3	38.3Kb	intact
NZ_CP077779.1	CDI231	CDI231_chr_4	58.1Kb	intact
NZ_CP077779.1	CDI231	CDI231_chr_5	35.2Kb	intact
NZ_CP077779.1	CDI231	CDI231_chr_7	34.5Kb	intact
NZ_CP077784.1	CDI231	CDI231_pla_pCDI231-348.3_3	35Kb	intact
NZ_CP077781.1	CDI231	CDI231_pla_pCDI231-42.6_1	42.1Kb	intact
NZ_CP077773.1	CDI694	CDI694_chr_2	61.3Kb	intact
NZ_CP077773.1	CDI694	CDI694_chr_3	53.9Kb	intact
NZ_CP077773.1	CDI694	CDI694_chr_5	56.8Kb	intact
NZ_CP077773.1	CDI694	CDI694_chr_9	68.8Kb	intact
NZ_CP077773.1	CDI694	CDI694_chr_10	37.5Kb	intact
NZ_CP077777.1	CDI694	CDI694_pla_pCDI694-140.8_2	27.1Kb	intact
NZ_CP028180.1	CFSAN054110	CFSAN054110_chr_2	48.1Kb	intact
NZ_CP028180.1	CFSAN054110	CFSAN054110_chr_3	48.6Kb	intact
NZ_CP028180.1	CFSAN054110	CFSAN054110_chr_5	56.9Kb	intact
NZ_CP028180.1	CFSAN054110	CFSAN054110_chr_7	62.6Kb	intact
NZ_CP028180.1	CFSAN054110	CFSAN054110_chr_8	39.4Kb	intact
NZ_CP028180.1	CFSAN054110	CFSAN054110_chr_9	52Kb	intact
NZ_CP028181.1	CFSAN054110	CFSAN054110_pla_pGMI16-005_01_2	20.9Kb	intact
NZ_CP028181.1	CFSAN054110	CFSAN054110_pla_pGMI16-005_01_3	21.8Kb	intact
NZ_CP028176.1	CFSAN054111	CFSAN054111_chr_1	43.9Kb	intact
NZ_CP028176.1	CFSAN054111	CFSAN054111_chr_2	37.8Kb	intact
NZ_CP028178.1	CFSAN054111	CFSAN054111_pla_pGMI16-006_2_1	44.9Kb	intact
NC_022566.1	CG43	CG43_chr_1	36.9Kb	intact
NZ_CP104196.1	CHN23026	CHN23026_chr_6	60.3Kb	intact
NZ_CP015382.1	CN1	CN1_chr_1	48Kb	intact
NZ_CP015382.1	CN1	CN1_chr_2	48.1Kb	intact
NZ_CP015383.1	CN1	CN1_pla_pCN1_1_1	41.4Kb	intact
NZ_OV408202.1	CNR146C9	CNR146C9_chr_c1_5	40.5Kb	intact
NZ_OV408202.1	CNR146C9	CNR146C9_chr_c1_6	49.7Kb	intact
NZ_OV408203.1	CNR146C9	CNR146C9_pla_p1_3	16.6Kb	intact
NZ_OV408204.1	CNR146C9	CNR146C9_pla_p2_1	52Kb	intact
NZ_OV408205.1	CNR146C9	CNR146C9_pla_p3_1	45.8Kb	intact
NZ_LS399318.1	CNR48	CNR48_chr_1	48.4Kb	intact
NZ_LS399318.1	CNR48	CNR48_chr_3	42.4Kb	intact
NZ_LS399318.1	CNR48	CNR48_chr_4	48.3Kb	intact
NZ_CP072905.1	COL17	COL17_chr_1	53.3Kb	intact
NZ_CP072905.1	COL17	COL17_chr_3	40.2Kb	intact
NZ_CP072905.1	COL17	COL17_chr_5	47.6Kb	intact
NZ_CP072905.1	COL17	COL17_chr_6	30.8Kb	intact
NZ_CP073351.1	CP19	CP19_chr_2	61.2Kb	intact
NZ_CP073351.1	CP19	CP19_chr_3	53.9Kb	intact
NZ_CP073351.1	CP19	CP19_chr_5	56.8Kb	intact
NZ_CP073351.1	CP19	CP19_chr_8	40.3Kb	intact
NZ_CP073351.1	CP19	CP19_chr_9	37.5Kb	intact
NZ_CP073351.1	CP19	CP19_chr_10	50Kb	intact
NZ_CP040533.1	CR-HvKP1	CR-HvKP1_chr_2	64.3Kb	intact
NZ_CP040533.1	CR-HvKP1	CR-HvKP1_chr_3	53.8Kb	intact
NZ_CP040533.1	CR-HvKP1	CR-HvKP1_chr_5	61.5Kb	intact
NZ_CP040533.1	CR-HvKP1	CR-HvKP1_chr_8	36.4Kb	intact
NZ_CP040533.1	CR-HvKP1	CR-HvKP1_chr_9	39.4Kb	intact
NZ_CP040535.1	CR-HvKP1	CR-HvKP1_pla_pCR-HvKP1-KPC_1	49.5Kb	intact
NZ_CP040534.1	CR-HvKP1	CR-HvKP1_pla_pCR-HvKP1-VIR_1	24.4Kb	intact
NZ_CP024707.1	cr-hvkp3	cr-hvkp3_chr_4	46.6Kb	intact
NZ_CP024709.1	cr-hvkp3	cr-hvkp3_pla_pPUTH2_1	18.4Kb	intact
NZ_CP040539.1	CR-HvKP4	CR-HvKP4_chr_4	64.3Kb	intact
NZ_CP040539.1	CR-HvKP4	CR-HvKP4_chr_5	53.8Kb	intact
NZ_CP040539.1	CR-HvKP4	CR-HvKP4_chr_7	61.5Kb	intact
NZ_CP040539.1	CR-HvKP4	CR-HvKP4_chr_10	40Kb	intact
NZ_CP040539.1	CR-HvKP4	CR-HvKP4_chr_11	37.7Kb	intact
NZ_CP040541.1	CR-HvKP4	CR-HvKP4_pla_pCR-HvKP4-pKPC_4	35.4Kb	intact
NZ_CP040540.1	CR-HvKP4	CR-HvKP4_pla_pCR-HvKP4-VIR_1	21.3Kb	intact
NZ_CP040545.1	CR-HvKP5	CR-HvKP5_chr_2	64.3Kb	intact
NZ_CP040545.1	CR-HvKP5	CR-HvKP5_chr_3	53.8Kb	intact
NZ_CP040545.1	CR-HvKP5	CR-HvKP5_chr_5	58.7Kb	intact
NZ_CP040545.1	CR-HvKP5	CR-HvKP5_chr_8	36.4Kb	intact
NZ_CP040545.1	CR-HvKP5	CR-HvKP5_chr_9	39.4Kb	intact
NZ_CP040547.1	CR-HvKP5	CR-HvKP5_pla_pCR-HvKP5-KPC_3	42.7Kb	intact
NZ_CP015392.1	CR14	CR14_chr_2	49.3Kb	intact
NZ_CP015392.1	CR14	CR14_chr_3	50.6Kb	intact
NZ_CP015392.1	CR14	CR14_chr_5	37.5Kb	intact
NZ_CP015392.1	CR14	CR14_chr_8	47.5Kb	intact
NZ_CP015393.1	CR14	CR14_pla_pCR14_1_3	37.1Kb	intact
NZ_CP015395.1	CR14	CR14_pla_pCR14_3_1	48.2Kb	intact
NZ_CP063011.1	CriePir116	CriePir116_chr_3	50.9Kb	intact
NZ_CP063011.1	CriePir116	CriePir116_chr_4	55.6Kb	intact
NZ_CP063011.1	CriePir116	CriePir116_chr_5	37.5Kb	intact
NZ_CP063011.1	CriePir116	CriePir116_chr_6	50.1Kb	intact
NZ_CP063012.1	CriePir116	CriePir116_pla_unnamed_1	40Kb	intact
NZ_CP063008.1	CriePir120	CriePir120_chr_2	48.5Kb	intact
NZ_CP063008.1	CriePir120	CriePir120_chr_3	50.9Kb	intact
NZ_CP063008.1	CriePir120	CriePir120_chr_4	55.6Kb	intact
NZ_CP063008.1	CriePir120	CriePir120_chr_5	37.5Kb	intact
NZ_CP063008.1	CriePir120	CriePir120_chr_6	50.1Kb	intact
NZ_CP063003.1	CriePir154	CriePir154_chr_4	55.6Kb	intact
NZ_CP063003.1	CriePir154	CriePir154_chr_5	30.3Kb	intact
NZ_CP063003.1	CriePir154	CriePir154_chr_6	50.9Kb	intact
NZ_CP062997.1	CriePir197	CriePir197_chr_1	35.9Kb	intact
NZ_CP062997.1	CriePir197	CriePir197_chr_3	52.4Kb	intact
NZ_CP062997.1	CriePir197	CriePir197_chr_4	46Kb	intact
NZ_CP062997.1	CriePir197	CriePir197_chr_5	43.5Kb	intact
NZ_CP062997.1	CriePir197	CriePir197_chr_6	44Kb	intact
NZ_CP062999.1	CriePir197	CriePir197_pla_unnamed2_2	37.7Kb	intact
NZ_CP062993.1	CriePir200	CriePir200_chr_1	39.4Kb	intact
NZ_CP062993.1	CriePir200	CriePir200_chr_2	23.2Kb	intact
NZ_CP062993.1	CriePir200	CriePir200_chr_3	51.1Kb	intact
NZ_CP062993.1	CriePir200	CriePir200_chr_4	43.6Kb	intact
NZ_CP062994.1	CriePir200	CriePir200_pla_unnamed1_4	38.2Kb	intact
NZ_CP062986.1	CriePir26	CriePir26_chr_2	38.3Kb	intact
NZ_CP062986.1	CriePir26	CriePir26_chr_3	56.3Kb	intact
NZ_CP062986.1	CriePir26	CriePir26_chr_4	35.2Kb	intact
NZ_CP062986.1	CriePir26	CriePir26_chr_5	33.6Kb	intact
NZ_CP062987.1	CriePir26	CriePir26_pla_unnamed1_3	29.2Kb	intact
NZ_CP063023.1	CriePir45	CriePir45_chr_4	29.5Kb	intact
NZ_CP063019.1	CriePir75	CriePir75_chr_3	52.1Kb	intact
NZ_CP063019.1	CriePir75	CriePir75_chr_4	60.4Kb	intact
NZ_CP063019.1	CriePir75	CriePir75_chr_6	37.5Kb	intact
NZ_CP063019.1	CriePir75	CriePir75_chr_7	53.3Kb	intact
NZ_CP063019.1	CriePir75	CriePir75_chr_10	34.8Kb	intact
NZ_CP063020.1	CriePir75	CriePir75_pla_unnamed1_1	26.6Kb	intact
NZ_CP063013.1	CriePir99	CriePir99_chr_1	44.6Kb	intact
NZ_CP063013.1	CriePir99	CriePir99_chr_3	40.1Kb	intact
NZ_CP063013.1	CriePir99	CriePir99_chr_4	55.4Kb	intact
NZ_CP034039.1	CRK0298	CRK0298_chr_4	53.5Kb	intact
NZ_CP034039.1	CRK0298	CRK0298_chr_5	55.8Kb	intact
NZ_CP034039.1	CRK0298	CRK0298_chr_6	37.5Kb	intact
NZ_CP034039.1	CRK0298	CRK0298_chr_7	52.5Kb	intact
NZ_CP034039.1	CRK0298	CRK0298_chr_9	34.8Kb	intact
NZ_CP034040.1	CRK0298	CRK0298_pla_p1_2	23.4Kb	intact
NZ_CP091330.1	CRK3022	CRK3022_chr_2	60.2Kb	intact
NZ_CP091330.1	CRK3022	CRK3022_chr_3	38.6Kb	intact
NZ_CP024838.1	CRKP-1215	CRKP-1215_chr_2	40.2Kb	intact
NZ_CP024838.1	CRKP-1215	CRKP-1215_chr_4	31.3Kb	intact
NZ_CP024838.1	CRKP-1215	CRKP-1215_chr_5	47Kb	intact
NZ_CP024838.1	CRKP-1215	CRKP-1215_chr_6	55.4Kb	intact
NZ_CP024841.1	CRKP-1215	CRKP-1215_pla_pCRKP-1215_3_1	72.5Kb	intact
NZ_CP024834.1	CRKP-2297	CRKP-2297_chr_1	40.2Kb	intact
NZ_CP024834.1	CRKP-2297	CRKP-2297_chr_3	31.3Kb	intact
NZ_CP024834.1	CRKP-2297	CRKP-2297_chr_4	48Kb	intact
NZ_CP024834.1	CRKP-2297	CRKP-2297_chr_5	55.4Kb	intact
NZ_CP024837.1	CRKP-2297	CRKP-2297_pla_pCRKP-2297_3_1	69.2Kb	intact
NZ_CP027863.1	CRKP18622	CRKP18622_chr_1	38.4Kb	intact
NZ_CP027863.1	CRKP18622	CRKP18622_chr_3	49.4Kb	intact
NZ_CP027863.1	CRKP18622	CRKP18622_chr_4	51.3Kb	intact
NZ_CP027863.1	CRKP18622	CRKP18622_chr_7	34.6Kb	intact
NZ_CP027864.1	CRKP18622	CRKP18622_pla_pCRKP18622-1_1	105.4Kb	intact
NZ_CP066249.1	CRKP52R	CRKP52R_chr_2	61.3Kb	intact
NZ_CP066249.1	CRKP52R	CRKP52R_chr_3	53.9Kb	intact
NZ_CP066249.1	CRKP52R	CRKP52R_chr_4	55.9Kb	intact
NZ_CP066249.1	CRKP52R	CRKP52R_chr_8	68.8Kb	intact
NZ_CP066249.1	CRKP52R	CRKP52R_chr_9	39.4Kb	intact
NZ_CP066250.1	CRKP52R	CRKP52R_pla_p2_1	26Kb	intact
NZ_CP066251.1	CRKP52R	CRKP52R_pla_p3_2	35.4Kb	intact
NZ_CP063833.1	CRKP66R	CRKP66R_chr_2	61.3Kb	intact
NZ_CP063833.1	CRKP66R	CRKP66R_chr_3	55.1Kb	intact
NZ_CP063833.1	CRKP66R	CRKP66R_chr_5	56.8Kb	intact
NZ_CP063833.1	CRKP66R	CRKP66R_chr_7	45.5Kb	intact
NZ_CP063833.1	CRKP66R	CRKP66R_chr_8	37.5Kb	intact
NZ_CP063836.1	CRKP66R	CRKP66R_pla_pCRKP66R-4-tetA_1	39.2Kb	intact
NZ_CP066254.1	CRKP78R	CRKP78R_chr_2	61.3Kb	intact
NZ_CP066254.1	CRKP78R	CRKP78R_chr_3	53.9Kb	intact
NZ_CP066254.1	CRKP78R	CRKP78R_chr_5	56.8Kb	intact
NZ_CP066254.1	CRKP78R	CRKP78R_chr_8	45.5Kb	intact
NZ_CP066254.1	CRKP78R	CRKP78R_chr_9	37.5Kb	intact
NZ_CP066256.1	CRKP78R	CRKP78R_pla_p3_2	21.1Kb	intact
NZ_CP081891.1	CT-04	CT-04_chr_1	50.4Kb	intact
NZ_CP093151.1	CY814036	CY814036_chr_3	41.9Kb	intact
NZ_CP093151.1	CY814036	CY814036_chr_6	32.1Kb	intact
NZ_CP093151.1	CY814036	CY814036_chr_7	47.3Kb	intact
NZ_CP093153.1	CY814036	CY814036_pla_pCY814036-KPC2_1	25.3Kb	intact
NZ_CP030072.1	DA12090	DA12090_chr_1	43.4Kb	intact
NZ_CP030072.1	DA12090	DA12090_chr_2	49.4Kb	intact
NZ_CP030072.1	DA12090	DA12090_chr_3	52.2Kb	intact
NZ_CP030072.1	DA12090	DA12090_chr_5	46.4Kb	intact
NZ_CP029582.1	DA33140	DA33140_chr_1	47.5Kb	intact
NZ_CP029582.1	DA33140	DA33140_chr_3	41.3Kb	intact
NZ_CP029582.1	DA33140	DA33140_chr_4	55.2Kb	intact
NZ_CP029586.1	DA33140	DA33140_pla_pDA33140-96_1	33.4Kb	intact
NZ_CP029587.1	DA33141	DA33141_chr_1	48.4Kb	intact
NZ_CP029587.1	DA33141	DA33141_chr_3	42.6Kb	intact
NZ_CP029587.1	DA33141	DA33141_chr_4	47.1Kb	intact
NZ_CP029587.1	DA33141	DA33141_chr_5	68.3Kb	intact
NZ_CP029587.1	DA33141	DA33141_chr_6	38.3Kb	intact
NZ_CP029588.1	DA33141	DA33141_pla_pDA33141-217_2	32.2Kb	intact
NZ_CP029590.1	DA33144	DA33144_chr_1	48.4Kb	intact
NZ_CP029590.1	DA33144	DA33144_chr_3	42.6Kb	intact
NZ_CP029590.1	DA33144	DA33144_chr_4	47.2Kb	intact
NZ_CP029590.1	DA33144	DA33144_chr_5	68.3Kb	intact
NZ_CP029590.1	DA33144	DA33144_chr_6	38.3Kb	intact
NZ_CP024429.1	DA48896	DA48896_chr_1	57.2Kb	intact
NZ_CP024429.1	DA48896	DA48896_chr_2	47Kb	intact
NZ_CP024429.1	DA48896	DA48896_chr_3	33Kb	intact
NZ_CP024429.1	DA48896	DA48896_chr_4	41.3Kb	intact
NZ_CP024433.1	DA48896	DA48896_pla_p48896_4_1	41.9Kb	intact
NZ_CP087606.1	DD01304	DD01304_chr_3	51.1Kb	intact
NZ_CP087606.1	DD01304	DD01304_chr_4	55.8Kb	intact
NZ_CP087606.1	DD01304	DD01304_chr_6	56.8Kb	intact
NZ_CP087606.1	DD01304	DD01304_chr_9	39.4Kb	intact
NZ_CP087606.1	DD01304	DD01304_chr_10	38.5Kb	intact
NZ_CP087606.1	DD01304	DD01304_chr_12	34.6Kb	intact
NZ_CP087608.1	DD01304	DD01304_pla_pDD01304-2_3	38.2Kb	intact
NZ_CP087657.1	DD01635	DD01635_chr_1	61.3Kb	intact
NZ_CP087657.1	DD01635	DD01635_chr_2	49.6Kb	intact
NZ_CP087657.1	DD01635	DD01635_chr_3	46.2Kb	intact
NZ_CP087657.1	DD01635	DD01635_chr_5	58.1Kb	intact
NZ_CP087657.1	DD01635	DD01635_chr_7	40.3Kb	intact
NZ_CP087657.1	DD01635	DD01635_chr_8	57.7Kb	intact
NZ_CP087657.1	DD01635	DD01635_chr_9	38.7Kb	intact
NZ_CP087659.1	DD01635	DD01635_pla_pDD01635-2_1	35.8Kb	intact
NZ_CP087651.1	DD01653	DD01653_chr_1	62.5Kb	intact
NZ_CP087651.1	DD01653	DD01653_chr_2	49.6Kb	intact
NZ_CP087651.1	DD01653	DD01653_chr_4	58.1Kb	intact
NZ_CP087651.1	DD01653	DD01653_chr_6	40.3Kb	intact
NZ_CP087651.1	DD01653	DD01653_chr_7	57.7Kb	intact
NZ_CP087651.1	DD01653	DD01653_chr_8	37.5Kb	intact
NZ_CP087654.1	DD01653	DD01653_pla_pDD01653-3_1	29.6Kb	intact
NZ_CP087645.1	DD01754	DD01754_chr_3	100.5Kb	intact
NZ_CP087645.1	DD01754	DD01754_chr_4	45.9Kb	intact
NZ_CP087645.1	DD01754	DD01754_chr_6	56.8Kb	intact
NZ_CP087645.1	DD01754	DD01754_chr_9	33.2Kb	intact
NZ_CP087645.1	DD01754	DD01754_chr_10	39.9Kb	intact
NZ_CP087646.1	DD01754	DD01754_pla_pDD01754-1_3	29.4Kb	intact
NZ_CP087647.1	DD01754	DD01754_pla_pDD01754-2_4	35.4Kb	intact
NZ_CP087648.1	DD01754	DD01754_pla_pDD01754-3_1	54.5Kb	intact
NZ_CP087663.1	DD01845	DD01845_chr_2	49.6Kb	intact
NZ_CP087663.1	DD01845	DD01845_chr_4	56.8Kb	intact
NZ_CP087663.1	DD01845	DD01845_chr_6	40.3Kb	intact
NZ_CP087663.1	DD01845	DD01845_chr_7	57.7Kb	intact
NZ_CP087663.1	DD01845	DD01845_chr_8	37.5Kb	intact
NZ_CP087665.1	DD01845	DD01845_pla_pDD01845-2_1	27.7Kb	intact
NZ_CP087618.1	DD02162	DD02162_chr_3	37.8Kb	intact
NZ_CP087623.1	DD02280	DD02280_chr_3	61.3Kb	intact
NZ_CP087623.1	DD02280	DD02280_chr_4	53.9Kb	intact
NZ_CP087623.1	DD02280	DD02280_chr_6	56.9Kb	intact
NZ_CP087623.1	DD02280	DD02280_chr_9	66.9Kb	intact
NZ_CP087623.1	DD02280	DD02280_chr_10	37.5Kb	intact
NZ_CP087624.1	DD02280	DD02280_pla_pDD02280-1_1	18.3Kb	intact
NZ_CP087625.1	DD02280	DD02280_pla_pDD02280-2_2	34.8Kb	intact
NZ_CP087634.1	DD02297	DD02297_chr_2	51.1Kb	intact
NZ_CP087634.1	DD02297	DD02297_chr_3	53.9Kb	intact
NZ_CP087634.1	DD02297	DD02297_chr_5	56.8Kb	intact
NZ_CP087634.1	DD02297	DD02297_chr_8	40.3Kb	intact
NZ_CP087634.1	DD02297	DD02297_chr_9	45.5Kb	intact
NZ_CP087634.1	DD02297	DD02297_chr_10	38.7Kb	intact
NZ_CP087635.1	DD02297	DD02297_pla_pDD02297-1_1	15.7Kb	intact
NZ_CP087629.1	DD02341	DD02341_chr_2	64.2Kb	intact
NZ_CP087629.1	DD02341	DD02341_chr_3	53.9Kb	intact
NZ_CP087629.1	DD02341	DD02341_chr_5	58.7Kb	intact
NZ_CP087629.1	DD02341	DD02341_chr_8	40.3Kb	intact
NZ_CP087629.1	DD02341	DD02341_chr_9	39.4Kb	intact
NZ_CP087630.1	DD02341	DD02341_pla_pDD02341-1_4	35.4Kb	intact
NZ_CP087631.1	DD02341	DD02341_pla_pDD02341-2_1	21.3Kb	intact
NZ_CP087639.1	DD02391	DD02391_chr_2	61.3Kb	intact
NZ_CP087639.1	DD02391	DD02391_chr_3	51.5Kb	intact
NZ_CP087639.1	DD02391	DD02391_chr_5	55.9Kb	intact
NZ_CP087639.1	DD02391	DD02391_chr_9	66.9Kb	intact
NZ_CP087639.1	DD02391	DD02391_chr_10	37.5Kb	intact
NZ_CP087641.1	DD02391	DD02391_pla_pDD02391-2_1	18.3Kb	intact
NZ_CP075317.1	DD521	DD521_pla_pDD521.1_1	112.1Kb	intact
NZ_CP016811.1	DHQP1002001	DHQP1002001_chr_2	82.4Kb	intact
NZ_CP016811.1	DHQP1002001	DHQP1002001_chr_3	37.5Kb	intact
NZ_CP016811.1	DHQP1002001	DHQP1002001_chr_5	44.6Kb	intact
NZ_CP016810.1	DHQP1002001	DHQP1002001_pla_p_IncFIB_DHQP1002001_1	51Kb	intact
NZ_CP016812.1	DHQP1002001	DHQP1002001_pla_p_incR_DHQP1002001_2	44.7Kb	intact
NZ_CP022127.1	DHQP1605752_NV	DHQP1605752_NV_chr_1	54.2Kb	intact
NZ_CP022127.1	DHQP1605752_NV	DHQP1605752_NV_chr_2	46.6Kb	intact
NZ_CP022128.1	DHQP1605752_NV	DHQP1605752_NV_pla_p1605752FIB_2_1	111Kb	intact
NZ_CP065436.1	Dirty Dan	Dirty_Dan_chr_1	40.6Kb	intact
NZ_CP065436.1	Dirty Dan	Dirty_Dan_chr_2	46.1Kb	intact
NZ_CP065436.1	Dirty Dan	Dirty_Dan_chr_3	47.1Kb	intact
NZ_OV049808.1	DJ	DJ_chr_DJ_2	40.2Kb	intact
NZ_OV049808.1	DJ	DJ_chr_DJ_4	27.1Kb	intact
NZ_OV049808.1	DJ	DJ_chr_DJ_6	47Kb	intact
NZ_OV049808.1	DJ	DJ_chr_DJ_7	55.4Kb	intact
NZ_OV049816.1	DJ	DJ_pla_DJ_-phage_N15_1	54.3Kb	intact
[truncated: 13,947 more rows]
