# Supplementary material for: Characterization and Diversity of Klebsiella pneumoniae Prophages
Source: Int J Mol Sci. 2023 May 23;24(11):9116. doi: 10.3390/ijms24119116 (PMC10252525; doi:10.3390/ijms24119116)
Supplement: Supplementary file 1 [file ijms-24-09116-s001.zip › Supplementary Table S2.tsv]

Strain_RefSeq_Accn	Strain_Name	Prophage_Name	Chr_ST	K_locus	O_locus	Most_Common_Phage
NZ_CP025515.1	002SK2	002SK2_chr_1	ST147	KL10	O3/O3a	Erwini_vB_EhrS_59
NZ_CP025515.1	002SK2	002SK2_chr_2	ST147	KL10	O3/O3a	Klebsi_phiKO2
NZ_CP025515.1	002SK2	002SK2_chr_3	ST147	KL10	O3/O3a	Entero_mEp235
NZ_CP025515.1	002SK2	002SK2_chr_4	ST147	KL10	O3/O3a	Entero_mEp235
NZ_CP025515.1	002SK2	002SK2_chr_5	ST147	KL10	O3/O3a	Salmon_118970_sal3
NZ_CP025515.1	002SK2	002SK2_chr_6	ST147	KL10	O3/O3a	Klebsi_ST147_VIM1phi7.1
NZ_CP083075.1	0113481141	0113481141_chr_1	ST147	KL10	O3/O3a	Shigel_SfIV
NZ_CP083075.1	0113481141	0113481141_chr_2	ST147	KL10	O3/O3a	Klebsi_ST147_VIM1phi7.1
NZ_CP083075.1	0113481141	0113481141_chr_3	ST147	KL10	O3/O3a	Entero_mEp213
NZ_CP083075.1	0113481141	0113481141_chr_4	ST147	KL10	O3/O3a	Salmon_Fels_1
NZ_CP083075.1	0113481141	0113481141_chr_5	ST147	KL10	O3/O3a	Haemop_SuMu
NZ_CP083075.1	0113481141	0113481141_chr_6	ST147	KL10	O3/O3a	Erwini_vB_EhrS_59
NZ_CP083075.1	0113481141	0113481141_chr_7	ST147	KL10	O3/O3a	Bacill_vB_BtS_BMBtp14
NZ_CP033396.2	015625	015625_chr_1	ST11	KL64	O1/O2v1	Shigel_SfIV
NZ_CP033396.2	015625	015625_chr_2	ST11	KL64	O1/O2v1	Escher_RCS47
NZ_CP033396.2	015625	015625_chr_3	ST11	KL64	O1/O2v1	Escher_phiV10
NZ_CP033396.2	015625	015625_chr_4	ST11	KL64	O1/O2v1	Klebsi_ST437_OXA245phi4.1
NZ_CP033396.2	015625	015625_chr_5	ST11	KL64	O1/O2v1	Escher_vB_EcoM_Schickermooser
NZ_CP033396.2	015625	015625_chr_6	ST11	KL64	O1/O2v1	Escher_RCS47
NZ_CP033396.2	015625	015625_chr_7	ST11	KL64	O1/O2v1	Salmon_SEN34
NZ_CP033396.2	015625	015625_chr_8	ST11	KL64	O1/O2v1	Cronob_ENT39118
NZ_CP033396.2	015625	015625_chr_9	ST11	KL64	O1/O2v1	Escher_HK639
NZ_CP033396.2	015625	015625_chr_10	ST11	KL64	O1/O2v1	Klebsi_phiKO2
NZ_CP033396.2	015625	015625_chr_11	ST11	KL64	O1/O2v1	Klebsi_ST512_KPC3phi13.2
NZ_CP033396.2	015625	015625_chr_12	ST11	KL64	O1/O2v1	Entero_P4
NZ_CP033396.2	015625	015625_chr_13	ST11	KL64	O1/O2v1	Entero_P4
NZ_CP083051.1	0213293972	0213293972_chr_1	ST37	KL15	O4	Escher_500465_1
NZ_CP083051.1	0213293972	0213293972_chr_2	ST37	KL15	O4	Erwini_vB_EhrS_59
NZ_CP083051.1	0213293972	0213293972_chr_3	ST37	KL15	O4	Entero_HK140
NZ_CP083051.1	0213293972	0213293972_chr_4	ST37	KL15	O4	Entero_mEp237
NZ_CP084873.1	03-9138-2	03-9138-2_chr_1	ST65	KL2	O1/O2v2	Escher_500465_1
NZ_CP084873.1	03-9138-2	03-9138-2_chr_2	ST65	KL2	O1/O2v2	Burkho_KS9
NZ_CP084873.1	03-9138-2	03-9138-2_chr_3	ST65	KL2	O1/O2v2	Erwini_vB_EhrS_59
NZ_CP084871.1	04A025	04A025_chr_1	ST15	KL24	O1/O2v1	Entero_186
NZ_CP084871.1	04A025	04A025_chr_2	ST15	KL24	O1/O2v1	Klebsi_ST147_VIM1phi7.1
NZ_CP084871.1	04A025	04A025_chr_3	ST15	KL24	O1/O2v1	Escher_500465_1
NZ_CP084871.1	04A025	04A025_chr_4	ST15	KL24	O1/O2v1	Entero_mEp213
NZ_CP084871.1	04A025	04A025_chr_5	ST15	KL24	O1/O2v1	Salmon_118970_sal3
NZ_CP049719.1	06KM907	06KM907_chr_1	ST11	KL105	O1/O2v2	Salmon_ST64B
NZ_CP049719.1	06KM907	06KM907_chr_2	ST11	KL105	O1/O2v2	Klebsi_ST147_VIM1phi7.1
NZ_CP049719.1	06KM907	06KM907_chr_3	ST11	KL105	O1/O2v2	Escher_500465_1
NZ_CP049719.1	06KM907	06KM907_chr_4	ST11	KL105	O1/O2v2	Salmon_SEN34
NZ_CP049719.1	06KM907	06KM907_chr_5	ST11	KL105	O1/O2v2	Salmon_SEN34
NZ_CP049719.1	06KM907	06KM907_chr_6	ST11	KL105	O1/O2v2	Staphy_SPbeta_like
NZ_CP049719.1	06KM907	06KM907_chr_7	ST11	KL105	O1/O2v2	Escher_HK639
NZ_CP049719.1	06KM907	06KM907_chr_8	ST11	KL105	O1/O2v2	Klebsi_ST512_KPC3phi13.2
NZ_CP049719.1	06KM907	06KM907_chr_9	ST11	KL105	O1/O2v2	Entero_P4
NZ_CP049719.1	06KM907	06KM907_chr_10	ST11	KL105	O1/O2v2	Entero_P4
NZ_CP049719.1	06KM907	06KM907_chr_11	ST11	KL105	O1/O2v2	Bacill_vB_BtS_BMBtp14
NZ_CP025576.1	08EU827	08EU827_chr_1	ST101	KL106	O1/O2v2	Klebsi_ST147_VIM1phi7.1
NZ_CP025576.1	08EU827	08EU827_chr_2	ST101	KL106	O1/O2v2	Escher_500465_1
NZ_CP025576.1	08EU827	08EU827_chr_3	ST101	KL106	O1/O2v2	Klebsi_ST16_OXA48phi5.4
NZ_CP025576.1	08EU827	08EU827_chr_4	ST101	KL106	O1/O2v2	Entero_mEp213
NZ_CP025576.1	08EU827	08EU827_chr_5	ST101	KL106	O1/O2v2	Entero_P4
NZ_CP042321.1	1-16	1-16_chr_1	ST512	KL107	O1/O2v2	Salmon_118970_sal3
NZ_CP042321.1	1-16	1-16_chr_2	ST512	KL107	O1/O2v2	Entero_P4
NZ_CP042321.1	1-16	1-16_chr_3	ST512	KL107	O1/O2v2	Entero_P4
NZ_CP042321.1	1-16	1-16_chr_4	ST512	KL107	O1/O2v2	Erwini_vB_EhrS_59
NZ_CP042321.1	1-16	1-16_chr_5	ST512	KL107	O1/O2v2	Klebsi_ST512_KPC3phi13.2
NZ_CP042321.1	1-16	1-16_chr_6	ST512	KL107	O1/O2v2	Salmon_SEN34
NZ_CP042321.1	1-16	1-16_chr_7	ST512	KL107	O1/O2v2	Escher_RCS47
NZ_CP042321.1	1-16	1-16_chr_8	ST512	KL107	O1/O2v2	Escher_500465_1
NZ_CP042311.1	101-17	101-17_chr_1	ST1519	KL107	O1/O2v2	Entero_SfI
NZ_CP042311.1	101-17	101-17_chr_2	ST1519	KL107	O1/O2v2	Entero_P4
NZ_CP042311.1	101-17	101-17_chr_3	ST1519	KL107	O1/O2v2	Entero_P4
NZ_CP042311.1	101-17	101-17_chr_4	ST1519	KL107	O1/O2v2	Erwini_vB_EhrS_59
NZ_CP042311.1	101-17	101-17_chr_5	ST1519	KL107	O1/O2v2	Klebsi_ST512_KPC3phi13.2
NZ_CP042311.1	101-17	101-17_chr_6	ST1519	KL107	O1/O2v2	Salmon_SEN34
NZ_CP042311.1	101-17	101-17_chr_7	ST1519	KL107	O1/O2v2	Escher_RCS47
NZ_CP042311.1	101-17	101-17_chr_8	ST1519	KL107	O1/O2v2	Klebsi_ST437_OXA245phi4.1
NZ_OW970374.1	101	1011_chr_main_1	ST101	KL17	O1/O2v1	Klebsi_ST13_OXA48phi12.1
NZ_OW970374.1	101	1011_chr_main_2	ST101	KL17	O1/O2v1	Escher_500465_1
NZ_OW970374.1	101	1011_chr_main_3	ST101	KL17	O1/O2v1	Escher_phiV10
NZ_OW970374.1	101	1011_chr_main_4	ST101	KL17	O1/O2v1	Escher_phAPEC8
NZ_OW970374.1	101	1011_chr_main_5	ST101	KL17	O1/O2v1	Salmon_118970_sal3
NZ_OW970374.1	101	1011_chr_main_6	ST101	KL17	O1/O2v1	Klebsi_3LV2017
NZ_OW970374.1	101	1011_chr_main_7	ST101	KL17	O1/O2v1	Klebsi_ST437_OXA245phi4.1
NZ_OW970374.1	101	1011_chr_main_8	ST101	KL17	O1/O2v1	Erwini_vB_EhrS_59
NZ_OW970444.1	101	1012_chr_main_1	ST101	KL17	O1/O2v1	Klebsi_ST147_VIM1phi7.1
NZ_OW970444.1	101	1012_chr_main_2	ST101	KL17	O1/O2v1	Escher_500465_1
NZ_OW970444.1	101	1012_chr_main_3	ST101	KL17	O1/O2v1	Escher_phiV10
NZ_OW970444.1	101	1012_chr_main_4	ST101	KL17	O1/O2v1	Salmon_118970_sal3
NZ_OW970444.1	101	1012_chr_main_5	ST101	KL17	O1/O2v1	Klebsi_3LV2017
NZ_OW970444.1	101	1012_chr_main_6	ST101	KL17	O1/O2v1	Erwini_vB_EhrS_59
NZ_CP100312.1	1020	1020_chr_1	ST37	KL38	O3b	Klebsi_ST15_OXA48phi14.1
NZ_CP100312.1	1020	1020_chr_2	ST37	KL38	O3b	Escher_500465_1
NZ_CP100312.1	1020	1020_chr_3	ST37	KL38	O3b	Escher_HK639
NZ_CP100308.1	1021	1021_chr_1	ST37	KL38	O3b	Klebsi_ST15_OXA48phi14.1
NZ_CP100308.1	1021	1021_chr_2	ST37	KL38	O3b	Escher_500465_1
NZ_CP100308.1	1021	1021_chr_3	ST37	KL38	O3b	Escher_HK639
NZ_CP042310.1	103-17	103-17_chr_1	ST1519	KL107	O1/O2v2	Shigel_SfIV
NZ_CP042310.1	103-17	103-17_chr_2	ST1519	KL107	O1/O2v2	Entero_P4
NZ_CP042310.1	103-17	103-17_chr_3	ST1519	KL107	O1/O2v2	Entero_P4
NZ_CP042310.1	103-17	103-17_chr_4	ST1519	KL107	O1/O2v2	Erwini_vB_EhrS_59
NZ_CP042310.1	103-17	103-17_chr_5	ST1519	KL107	O1/O2v2	Klebsi_ST512_KPC3phi13.2
NZ_CP042310.1	103-17	103-17_chr_6	ST1519	KL107	O1/O2v2	Salmon_SEN34
NZ_CP042310.1	103-17	103-17_chr_7	ST1519	KL107	O1/O2v2	Microc_Ma_LMM01
NZ_CP042310.1	103-17	103-17_chr_8	ST1519	KL107	O1/O2v2	Klebsi_ST437_OXA245phi4.1
NZ_CP023416.1	1050	1050_chr_1	ST54	KL14	O3b	Klebsi_ST147_VIM1phi7.1
NZ_CP023416.1	1050	1050_chr_2	ST54	KL14	O3b	Entero_mEp237
NZ_CP023416.1	1050	1050_chr_3	ST54	KL14	O3b	Escher_phiV10
NZ_CP023416.1	1050	1050_chr_4	ST54	KL14	O3b	Salmon_SEN34
NZ_CP023416.1	1050	1050_chr_5	ST54	KL14	O3b	Klebsi_phiKO2
NC_018522.1	1084	1084_chr_1	ST23	KL1	O1/O2v2	Escher_500465_1
NC_018522.1	1084	1084_chr_2	ST23	KL1	O1/O2v2	Bacill_SP_15
NC_018522.1	1084	1084_chr_3	ST23	KL1	O1/O2v2	Bacill_PBS1
NC_018522.1	1084	1084_chr_4	ST23	KL1	O1/O2v2	Klebsi_phiKO2
NZ_CP042309.1	109-17	109-17_chr_1	ST512	KL107	O1/O2v2	Shigel_SfIV
NZ_CP042309.1	109-17	109-17_chr_2	ST512	KL107	O1/O2v2	Entero_P4
NZ_CP042309.1	109-17	109-17_chr_3	ST512	KL107	O1/O2v2	Entero_P4
NZ_CP042309.1	109-17	109-17_chr_4	ST512	KL107	O1/O2v2	Erwini_vB_EhrS_59
NZ_CP042309.1	109-17	109-17_chr_5	ST512	KL107	O1/O2v2	Klebsi_ST512_KPC3phi13.2
NZ_CP042309.1	109-17	109-17_chr_6	ST512	KL107	O1/O2v2	Salmon_SEN34
NZ_CP042309.1	109-17	109-17_chr_7	ST512	KL107	O1/O2v2	Microc_MaMV_DC
NZ_CP042309.1	109-17	109-17_chr_8	ST512	KL107	O1/O2v2	Escher_500465_1
NZ_CP091813.1	10MC160002271	10MC160002271_chr_1	ST383	KL30	O1/O2v2	Klebsi_ST147_VIM1phi7.1
NZ_CP091813.1	10MC160002271	10MC160002271_chr_2	ST383	KL30	O1/O2v2	Salmon_SEN34
NZ_CP091813.1	10MC160002271	10MC160002271_chr_3	ST383	KL30	O1/O2v2	Klebsi_ST13_OXA48phi12.1
NZ_CP091813.1	10MC160002271	10MC160002271_chr_4	ST383	KL30	O1/O2v2	Escher_500465_1
NZ_CP091813.1	10MC160002271	10MC160002271_chr_5	ST383	KL30	O1/O2v2	Escher_phiV10
NZ_CP091813.1	10MC160002271	10MC160002271_chr_6	ST383	KL30	O1/O2v2	Entero_mEp237
NZ_CP091813.1	10MC160002271	10MC160002271_chr_7	ST383	KL30	O1/O2v2	Klebsi_4LV2017
NZ_CP016923.1	11	111_chr_1	ST14	KL2	O1/O2v1	Entero_phiP27
NZ_CP016923.1	11	111_chr_2	ST14	KL2	O1/O2v1	Escher_HK639
NZ_CP016923.1	11	111_chr_4	ST14	KL2	O1/O2v1	Erwini_vB_EhrS_59
NZ_CP030174.1	11219	11219_chr_1	ST1755	KL107	O1/O2v1	Edward_GF_2
NZ_CP030174.1	11219	11219_chr_2	ST1755	KL107	O1/O2v1	Klebsi_3LV2017
NZ_CP030174.1	11219	11219_chr_4	ST1755	KL107	O1/O2v1	Klebsi_phiKO2
NZ_CP030174.1	11219	11219_chr_5	ST1755	KL107	O1/O2v1	Klebsi_ST16_OXA48phi5.4
NZ_CP030174.1	11219	11219_chr_6	ST1755	KL107	O1/O2v1	Entero_mEp237
NZ_CP030174.1	11219	11219_chr_7	ST1755	KL107	O1/O2v1	Salmon_Fels_1
NZ_CP030174.1	11219	11219_chr_8	ST1755	KL107	O1/O2v1	Entero_mEp235
NZ_CP030174.1	11219	11219_chr_9	ST1755	KL107	O1/O2v1	Stx2_c_Stx2a_F451
NZ_CP030174.1	11219	11219_chr_10	ST1755	KL107	O1/O2v1	Escher_500465_1
NZ_CP097223.1	11	112_chr_1	ST14	KL2	O1/O2v1	Erwini_vB_EhrS_59
NZ_CP097223.1	11	112_chr_3	ST14	KL2	O1/O2v1	Escher_HK639
NZ_CP097223.1	11	112_chr_4	ST14	KL2	O1/O2v1	Entero_phiP27
NZ_CP030315.1	11305	11305_chr_1	ST147	KL64	O1/O2v1	Klebsi_ST147_VIM1phi7.1
NZ_CP030315.1	11305	11305_chr_2	ST147	KL64	O1/O2v1	Escher_500465_1
NZ_CP030315.1	11305	11305_chr_3	ST147	KL64	O1/O2v1	Salmon_118970_sal3
NZ_CP030315.1	11305	11305_chr_4	ST147	KL64	O1/O2v1	Entero_mEp237
NZ_CP030315.1	11305	11305_chr_5	ST147	KL64	O1/O2v1	Klebsi_4LV2017
NZ_CP030315.1	11305	11305_chr_6	ST147	KL64	O1/O2v1	Escher_503458
NZ_CP030313.1	11311	11311_chr_1	ST412	KL57	O3b	Klebsi_ST16_OXA48phi5.4
NZ_CP030313.1	11311	11311_chr_2	ST412	KL57	O3b	Klebsi_phiKO2
NZ_CP026023.1	11420	11420_chr_1	ST1265	KL1	O1/O2v2	Escher_500465_1
NZ_CP026023.1	11420	11420_chr_2	ST1265	KL1	O1/O2v2	Salmon_SPN1S
NZ_CP026023.1	11420	11420_chr_3	ST1265	KL1	O1/O2v2	Erwini_vB_EhrS_59
NZ_CP026023.1	11420	11420_chr_4	ST1265	KL1	O1/O2v2	Mycoba_Equemioh13
NZ_CP026023.1	11420	11420_chr_5	ST1265	KL1	O1/O2v2	Serrat_phiMAM1
NZ_CP026023.1	11420	11420_chr_6	ST1265	KL1	O1/O2v2	Klebsi_phiKO2
NZ_CP030311.1	11454	11454_chr_1	ST86	KL2	O1/O2v1	Escher_500465_1
NZ_CP030311.1	11454	11454_chr_2	ST86	KL2	O1/O2v1	Entero_phiP27
NZ_CP030311.1	11454	11454_chr_3	ST86	KL2	O1/O2v1	Pseudo_phi297
NZ_CP030311.1	11454	11454_chr_4	ST86	KL2	O1/O2v1	Salmon_118970_sal3
NZ_CP030311.1	11454	11454_chr_5	ST86	KL2	O1/O2v1	Klebsi_ST16_OXA48phi5.4
NZ_CP026021.1	11492	11492_chr_1	ST23	KL1	O1/O2v2	Escher_500465_1
NZ_CP026021.1	11492	11492_chr_2	ST23	KL1	O1/O2v2	Salmon_SPN1S
NZ_CP026021.1	11492	11492_chr_3	ST23	KL1	O1/O2v2	Pseudo_MP1412
NZ_CP026021.1	11492	11492_chr_4	ST23	KL1	O1/O2v2	Lactob_LfeInf
NZ_CP026021.1	11492	11492_chr_5	ST23	KL1	O1/O2v2	Klebsi_phiKO2
NZ_CP006722.1	1158	1158_chr_1	ST65	KL2	O1/O2v2	Pseudo_vB_PaeS_PAO1_Ab18
NZ_CP006722.1	1158	1158_chr_2	ST65	KL2	O1/O2v2	Escher_500465_1
NZ_CP103654.1	1159	1159_chr_1	ST307	KL102	O1/O2v2	Clostr_phiCP7R
NZ_CP103654.1	1159	1159_chr_2	ST307	KL102	O1/O2v2	Shigel_SfIV
NZ_CP103654.1	1159	1159_chr_4	ST307	KL102	O1/O2v2	Escher_HK639
NZ_CP103654.1	1159	1159_chr_5	ST307	KL102	O1/O2v2	Salmon_118970_sal3
NZ_CP103654.1	1159	1159_chr_6	ST307	KL102	O1/O2v2	Entero_HK106
NZ_CP103654.1	1159	1159_chr_7	ST307	KL102	O1/O2v2	Stx2_c_Stx2a_F451
NZ_CP089427.1	1194	1194_chr_1	ST340	KL15	O4	Entero_SfI
NZ_CP089427.1	1194	1194_chr_2	ST340	KL15	O4	Escher_500465_1
NZ_CP089427.1	1194	1194_chr_3	ST340	KL15	O4	Salmon_SEN34
NZ_CP089427.1	1194	1194_chr_4	ST340	KL15	O4	Klebsi_4LV2017
NZ_CP089427.1	1194	1194_chr_5	ST340	KL15	O4	Entero_P4
NZ_CP089427.1	1194	1194_chr_6	ST340	KL15	O4	Entero_P4
NZ_CP089427.1	1194	1194_chr_7	ST340	KL15	O4	Bacill_vB_BtS_BMBtp14
NZ_CP049716.1	11KM256	11KM256_chr_1	ST11	KL105	O1/O2v2	Salmon_118970_sal3
NZ_CP049716.1	11KM256	11KM256_chr_2	ST11	KL105	O1/O2v2	Klebsi_ST147_VIM1phi7.1
NZ_CP049716.1	11KM256	11KM256_chr_3	ST11	KL105	O1/O2v2	Escher_500465_1
NZ_CP049716.1	11KM256	11KM256_chr_4	ST11	KL105	O1/O2v2	Salmon_SW9
NZ_CP049716.1	11KM256	11KM256_chr_5	ST11	KL105	O1/O2v2	Salmon_SEN34
NZ_CP049716.1	11KM256	11KM256_chr_6	ST11	KL105	O1/O2v2	Escher_RCS47
NZ_CP049716.1	11KM256	11KM256_chr_7	ST11	KL105	O1/O2v2	Escher_HK639
NZ_CP049716.1	11KM256	11KM256_chr_8	ST11	KL105	O1/O2v2	Klebsi_ST512_KPC3phi13.2
NZ_CP049716.1	11KM256	11KM256_chr_9	ST11	KL105	O1/O2v2	Entero_P4
NZ_CP049716.1	11KM256	11KM256_chr_10	ST11	KL105	O1/O2v2	Entero_P4
NZ_CP049716.1	11KM256	11KM256_chr_11	ST11	KL105	O1/O2v2	Bacill_vB_BtS_BMBtp14
NZ_CP031849.1	121	121_chr_1	ST2570	KL131	O4	Escher_500465_1
NZ_CP031849.1	121	121_chr_2	ST2570	KL131	O4	Ralsto_RSA1
NZ_CP031849.1	121	121_chr_3	ST2570	KL131	O4	Klebsi_ST147_VIM1phi7.1
NZ_CP031849.1	121	121_chr_4	ST2570	KL131	O4	Entero_c_1
NZ_CP031849.1	121	121_chr_5	ST2570	KL131	O4	Escher_RCS47
NZ_CP031849.1	121	121_chr_6	ST2570	KL131	O4	Entero_mEp237
NZ_CP031849.1	121	121_chr_7	ST2570	KL131	O4	Klebsi_phiKO2
NZ_CP031849.1	121	121_chr_8	ST2570	KL131	O4	Phage_Gifsy_2
NZ_CP031849.1	121	121_chr_9	ST2570	KL131	O4	Klebsi_ST512_KPC3phi13.2
NZ_CP031849.1	121	121_chr_10	ST2570	KL131	O4	Bacill_vB_BtS_BMBtp14
NZ_CP030172.1	12208	12208_chr_1	ST29	KL54	O1/O2v2	Erwini_vB_EhrS_59
NZ_CP083070.1	1230_0791_KP	1230_0791_KP_chr_1	ST392	KL27	O4	Klebsi_ST147_VIM1phi7.1
NZ_CP083070.1	1230_0791_KP	1230_0791_KP_chr_2	ST392	KL27	O4	Erwini_vB_EhrS_59
NZ_CP083070.1	1230_0791_KP	1230_0791_KP_chr_3	ST392	KL27	O4	Entero_mEp237
NZ_CP083070.1	1230_0791_KP	1230_0791_KP_chr_4	ST392	KL27	O4	Bacill_vB_BtS_BMBtp14
NZ_CP083070.1	1230_0791_KP	1230_0791_KP_chr_5	ST392	KL27	O4	Klebsi_phiKO2
NZ_CP097220.1	12	12er_chr_1	ST14	KL2	O1/O2v1	Erwini_vB_EhrS_59
NZ_CP097220.1	12	12er_chr_2	ST14	KL2	O1/O2v1	Entero_phiP27
NZ_CP097220.1	12	12er_chr_3	ST14	KL2	O1/O2v1	Escher_HK639
NZ_CP097220.1	12	12er_chr_5	ST14	KL2	O1/O2v1	Escher_500465_1
NZ_CP082765.1	12	12yi_chr_1	ST11	KL64	O1/O2v1	Salmon_118970_sal3
NZ_CP082765.1	12	12yi_chr_2	ST11	KL64	O1/O2v1	Escher_RCS47
NZ_CP082765.1	12	12yi_chr_3	ST11	KL64	O1/O2v1	Klebsi_ST437_OXA245phi4.1
NZ_CP082765.1	12	12yi_chr_4	ST11	KL64	O1/O2v1	Escher_phiV10
NZ_CP082765.1	12	12yi_chr_5	ST11	KL64	O1/O2v1	Entero_phi92
NZ_CP082765.1	12	12yi_chr_6	ST11	KL64	O1/O2v1	Salmon_SEN34
NZ_CP082765.1	12	12yi_chr_7	ST11	KL64	O1/O2v1	Escher_RCS47
NZ_CP082765.1	12	12yi_chr_8	ST11	KL64	O1/O2v1	Escher_HK639
NZ_CP082765.1	12	12yi_chr_10	ST11	KL64	O1/O2v1	Entero_c_1
NZ_CP082765.1	12	12yi_chr_11	ST11	KL64	O1/O2v1	Klebsi_ST512_KPC3phi13.2
NZ_CP082765.1	12	12yi_chr_12	ST11	KL64	O1/O2v1	Entero_P4
NZ_CP082765.1	12	12yi_chr_13	ST11	KL64	O1/O2v1	Entero_P4
NZ_CP098355.1	13001	13001_chr_1	ST258	KL107	O1/O2v2	Salmon_ST64B
NZ_CP098355.1	13001	13001_chr_2	ST258	KL107	O1/O2v2	Klebsi_ST437_OXA245phi4.1
NZ_CP098355.1	13001	13001_chr_3	ST258	KL107	O1/O2v2	Escher_phiV10
NZ_CP098355.1	13001	13001_chr_4	ST258	KL107	O1/O2v2	Escher_RCS47
NZ_CP098355.1	13001	13001_chr_5	ST258	KL107	O1/O2v2	Salmon_SEN34
NZ_CP098355.1	13001	13001_chr_6	ST258	KL107	O1/O2v2	Escher_RCS47
NZ_CP098355.1	13001	13001_chr_7	ST258	KL107	O1/O2v2	Escher_HK639
NZ_CP098355.1	13001	13001_chr_8	ST258	KL107	O1/O2v2	Klebsi_ST512_KPC3phi13.2
NZ_CP098355.1	13001	13001_chr_9	ST258	KL107	O1/O2v2	Erwini_vB_EhrS_59
NZ_CP098355.1	13001	13001_chr_10	ST258	KL107	O1/O2v2	Entero_P4
NZ_CP098355.1	13001	13001_chr_11	ST258	KL107	O1/O2v2	Entero_P4
NZ_CP026017.1	13190	13190_chr_1	ST392	KL27	O4	Klebsi_ST147_VIM1phi7.1
NZ_CP026017.1	13190	13190_chr_2	ST392	KL27	O4	Entero_mEp237
NZ_CP026017.1	13190	13190_chr_3	ST392	KL27	O4	Bacill_vB_BtS_BMBtp14
NZ_CP097626.1	140253	140253_chr_1	ST11	KL64	O1/O2v1	Salmon_ST64B
NZ_CP097626.1	140253	140253_chr_2	ST11	KL64	O1/O2v1	Escher_RCS47
NZ_CP097626.1	140253	140253_chr_3	ST11	KL64	O1/O2v1	Klebsi_ST437_OXA245phi4.1
NZ_CP097626.1	140253	140253_chr_4	ST11	KL64	O1/O2v1	Escher_phiV10
NZ_CP097626.1	140253	140253_chr_5	ST11	KL64	O1/O2v1	Escher_vB_EcoM_Schickermooser
NZ_CP097626.1	140253	140253_chr_6	ST11	KL64	O1/O2v1	Salmon_SEN34
NZ_CP097626.1	140253	140253_chr_7	ST11	KL64	O1/O2v1	Salmon_vB_SosS_Oslo
NZ_CP097626.1	140253	140253_chr_8	ST11	KL64	O1/O2v1	Escher_HK639
NZ_CP097626.1	140253	140253_chr_9	ST11	KL64	O1/O2v1	Klebsi_phiKO2
NZ_CP097626.1	140253	140253_chr_11	ST11	KL64	O1/O2v1	Klebsi_3LV2017
NZ_CP097626.1	140253	140253_chr_12	ST11	KL64	O1/O2v1	Klebsi_ST512_KPC3phi13.2
NZ_CP097626.1	140253	140253_chr_13	ST11	KL64	O1/O2v1	Entero_P4
NZ_CP097626.1	140253	140253_chr_14	ST11	KL64	O1/O2v1	Entero_P4
NZ_OW970514.1	147	14710_chr_main_1	ST147	KL64	O1/O2v1	Klebsi_ST147_VIM1phi7.1
NZ_OW970514.1	147	14710_chr_main_2	ST147	KL64	O1/O2v1	Escher_500465_1
NZ_OW970514.1	147	14710_chr_main_3	ST147	KL64	O1/O2v1	Entero_c_1
NZ_OW970514.1	147	14710_chr_main_4	ST147	KL64	O1/O2v1	Salmon_118970_sal3
NZ_OW970514.1	147	14710_chr_main_5	ST147	KL64	O1/O2v1	Bacill_vB_BtS_BMBtp14
NZ_OW970530.1	147	14711_chr_main_1	ST147	KL64	O1/O2v1	Klebsi_ST147_VIM1phi7.1
NZ_OW970530.1	147	14711_chr_main_2	ST147	KL64	O1/O2v1	Entero_c_1
NZ_OW970530.1	147	14711_chr_main_3	ST147	KL64	O1/O2v1	Salmon_118970_sal3
NZ_OW970530.1	147	14711_chr_main_4	ST147	KL64	O1/O2v1	Bacill_vB_BtS_BMBtp14
NZ_OW970540.1	147	14712_chr_main_1	ST147	KL64	O1/O2v1	Klebsi_ST147_VIM1phi7.1
NZ_OW970540.1	147	14712_chr_main_2	ST147	KL64	O1/O2v1	Escher_500465_1
NZ_OW970540.1	147	14712_chr_main_3	ST147	KL64	O1/O2v1	Entero_c_1
NZ_OW970540.1	147	14712_chr_main_4	ST147	KL64	O1/O2v1	Salmon_118970_sal3
NZ_OW970540.1	147	14712_chr_main_5	ST147	KL64	O1/O2v1	Bacill_vB_BtS_BMBtp14
NZ_OW970553.1	147	14713_chr_main_1	ST147	KL64	O1/O2v1	Klebsi_ST147_VIM1phi7.1
NZ_OW970553.1	147	14713_chr_main_2	ST147	KL64	O1/O2v1	Entero_c_1
NZ_OW970553.1	147	14713_chr_main_3	ST147	KL64	O1/O2v1	Salmon_118970_sal3
NZ_OW970553.1	147	14713_chr_main_4	ST147	KL64	O1/O2v1	Escher_503458
NZ_OW970560.1	147	14714_chr_main_1	ST147	KL64	O1/O2v1	Klebsi_ST147_VIM1phi7.1
NZ_OW970560.1	147	14714_chr_main_2	ST147	KL64	O1/O2v1	Entero_c_1
NZ_OW970560.1	147	14714_chr_main_3	ST147	KL64	O1/O2v1	Salmon_118970_sal3
NZ_OW970357.1	147	1471_chr_main_1	ST147	KL64	O1/O2v1	Klebsi_ST147_VIM1phi7.1
NZ_OW970357.1	147	1471_chr_main_2	ST147	KL64	O1/O2v1	Escher_500465_1
NZ_OW970357.1	147	1471_chr_main_3	ST147	KL64	O1/O2v1	Entero_c_1
NZ_OW970357.1	147	1471_chr_main_4	ST147	KL64	O1/O2v1	Salmon_118970_sal3
NZ_OW970357.1	147	1471_chr_main_5	ST147	KL64	O1/O2v1	Escher_503458
NZ_OW970365.1	147	1472_chr_main_1	ST147	KL64	O1/O2v1	Klebsi_ST147_VIM1phi7.1
NZ_OW970365.1	147	1472_chr_main_2	ST147	KL64	O1/O2v1	Entero_c_1
NZ_OW970365.1	147	1472_chr_main_3	ST147	KL64	O1/O2v1	Salmon_118970_sal3
NZ_OW970365.1	147	1472_chr_main_4	ST147	KL64	O1/O2v1	Escher_503458
NZ_OW970413.1	147	1473_chr_main_1	ST147	KL64	O1/O2v1	Klebsi_ST147_VIM1phi7.1
NZ_OW970413.1	147	1473_chr_main_2	ST147	KL64	O1/O2v1	Escher_500465_1
NZ_OW970413.1	147	1473_chr_main_3	ST147	KL64	O1/O2v1	Entero_c_1
NZ_OW970413.1	147	1473_chr_main_4	ST147	KL64	O1/O2v1	Salmon_118970_sal3
NZ_OW970422.1	147	1474_chr_main_1	ST147	KL64	O1/O2v1	Klebsi_ST147_VIM1phi7.1
NZ_OW970422.1	147	1474_chr_main_2	ST147	KL64	O1/O2v1	Escher_500465_1
NZ_OW970422.1	147	1474_chr_main_3	ST147	KL64	O1/O2v1	Entero_c_1
NZ_OW970422.1	147	1474_chr_main_4	ST147	KL64	O1/O2v1	Salmon_118970_sal3
NZ_OW970422.1	147	1474_chr_main_5	ST147	KL64	O1/O2v1	Escher_503458
NZ_OW970436.1	147	1475_chr_main_1	ST147	KL64	O1/O2v1	Klebsi_ST147_VIM1phi7.1
NZ_OW970436.1	147	1475_chr_main_2	ST147	KL64	O1/O2v1	Entero_c_1
NZ_OW970436.1	147	1475_chr_main_3	ST147	KL64	O1/O2v1	Salmon_118970_sal3
NZ_OW970436.1	147	1475_chr_main_4	ST147	KL64	O1/O2v1	Bacill_vB_BtS_BMBtp14
NZ_OW970452.1	147	1476_chr_main_1	ST147	KL64	O1/O2v1	Klebsi_ST147_VIM1phi7.1
NZ_OW970452.1	147	1476_chr_main_2	ST147	KL64	O1/O2v1	Entero_c_1
NZ_OW970452.1	147	1476_chr_main_3	ST147	KL64	O1/O2v1	Salmon_118970_sal3
NZ_OW970452.1	147	1476_chr_main_4	ST147	KL64	O1/O2v1	Escher_503458
NZ_OW970478.1	147	1477_chr_main_1	ST147	KL64	O1/O2v1	Klebsi_ST147_VIM1phi7.1
NZ_OW970478.1	147	1477_chr_main_2	ST147	KL64	O1/O2v1	Entero_c_1
NZ_OW970478.1	147	1477_chr_main_3	ST147	KL64	O1/O2v1	Salmon_118970_sal3
NZ_OW970478.1	147	1477_chr_main_4	ST147	KL64	O1/O2v1	Escher_503458
NZ_OW970486.1	147	1478_chr_main_1	ST147	KL64	O1/O2v1	Klebsi_ST147_VIM1phi7.1
NZ_OW970486.1	147	1478_chr_main_2	ST147	KL64	O1/O2v1	Entero_c_1
NZ_OW970486.1	147	1478_chr_main_3	ST147	KL64	O1/O2v1	Salmon_118970_sal3
NZ_OW970486.1	147	1478_chr_main_4	ST147	KL64	O1/O2v1	Microc_MaMV_DC
NZ_OW970486.1	147	1478_chr_main_5	ST147	KL64	O1/O2v1	Entero_mEp237
NZ_OW970492.1	147	1479_chr_main_1	ST147	KL64	O1/O2v1	Klebsi_ST147_VIM1phi7.1
NZ_OW970492.1	147	1479_chr_main_2	ST147	KL64	O1/O2v1	Escher_500465_1
NZ_OW970492.1	147	1479_chr_main_3	ST147	KL64	O1/O2v1	Entero_c_1
NZ_OW970492.1	147	1479_chr_main_4	ST147	KL64	O1/O2v1	Salmon_118970_sal3
NZ_CP103582.1	1498	1498_chr_1	ST1373	KL38	O3b	Escher_500465_1
NZ_CP103582.1	1498	1498_chr_2	ST1373	KL38	O3b	Escher_HK639
NZ_CP103582.1	1498	1498_chr_3	ST1373	KL38	O3b	Entero_c_1
NZ_CP103582.1	1498	1498_chr_4	ST1373	KL38	O3b	Entero_mEp235
NZ_CP103582.1	1498	1498_chr_5	ST1373	KL38	O3b	Entero_Tyrion
NZ_CP103582.1	1498	1498_chr_6	ST1373	KL38	O3b	Entero_P4
NZ_CP103582.1	1498	1498_chr_7	ST1373	KL38	O3b	Escher_503458
NZ_CP104030.1	150040X0B1	150040X0B1_chr_1	ST11	KL64	O1/O2v1	Salmon_ST64B
NZ_CP104030.1	150040X0B1	150040X0B1_chr_2	ST11	KL64	O1/O2v1	Entero_P1
NZ_CP104030.1	150040X0B1	150040X0B1_chr_3	ST11	KL64	O1/O2v1	Escher_RCS47
NZ_CP104030.1	150040X0B1	150040X0B1_chr_4	ST11	KL64	O1/O2v1	Klebsi_ST437_OXA245phi4.1
NZ_CP104030.1	150040X0B1	150040X0B1_chr_5	ST11	KL64	O1/O2v1	Escher_phiV10
NZ_CP104030.1	150040X0B1	150040X0B1_chr_6	ST11	KL64	O1/O2v1	Entero_phi92
NZ_CP104030.1	150040X0B1	150040X0B1_chr_7	ST11	KL64	O1/O2v1	Salmon_SEN34
NZ_CP104030.1	150040X0B1	150040X0B1_chr_8	ST11	KL64	O1/O2v1	Escher_RCS47
NZ_CP104030.1	150040X0B1	150040X0B1_chr_9	ST11	KL64	O1/O2v1	Klebsi_phiKO2
NZ_CP104030.1	150040X0B1	150040X0B1_chr_10	ST11	KL64	O1/O2v1	Klebsi_3LV2017
NZ_CP104030.1	150040X0B1	150040X0B1_chr_11	ST11	KL64	O1/O2v1	Klebsi_ST512_KPC3phi13.2
NZ_CP104030.1	150040X0B1	150040X0B1_chr_12	ST11	KL64	O1/O2v1	Entero_P4
NZ_CP104030.1	150040X0B1	150040X0B1_chr_13	ST11	KL64	O1/O2v1	Entero_P4
NZ_CP101726.1	150040X1B1	150040X1B1_chr_1	ST11	KL64	O1/O2v1	Salmon_ST64B
NZ_CP101726.1	150040X1B1	150040X1B1_chr_2	ST11	KL64	O1/O2v1	Entero_P1
NZ_CP101726.1	150040X1B1	150040X1B1_chr_3	ST11	KL64	O1/O2v1	Escher_RCS47
NZ_CP101726.1	150040X1B1	150040X1B1_chr_4	ST11	KL64	O1/O2v1	Klebsi_ST437_OXA245phi4.1
NZ_CP101726.1	150040X1B1	150040X1B1_chr_5	ST11	KL64	O1/O2v1	Escher_phiV10
NZ_CP101726.1	150040X1B1	150040X1B1_chr_6	ST11	KL64	O1/O2v1	Salmon_SJ46
NZ_CP101726.1	150040X1B1	150040X1B1_chr_7	ST11	KL64	O1/O2v1	Escher_phAPEC8
NZ_CP101726.1	150040X1B1	150040X1B1_chr_8	ST11	KL64	O1/O2v1	Salmon_SEN34
NZ_CP101726.1	150040X1B1	150040X1B1_chr_9	ST11	KL64	O1/O2v1	Salmon_vB_SosS_Oslo
NZ_CP101726.1	150040X1B1	150040X1B1_chr_10	ST11	KL64	O1/O2v1	Klebsi_phiKO2
NZ_CP101726.1	150040X1B1	150040X1B1_chr_11	ST11	KL64	O1/O2v1	Klebsi_3LV2017
NZ_CP101726.1	150040X1B1	150040X1B1_chr_12	ST11	KL64	O1/O2v1	Klebsi_ST512_KPC3phi13.2
NZ_CP101726.1	150040X1B1	150040X1B1_chr_13	ST11	KL64	O1/O2v1	Entero_P4
NZ_CP101726.1	150040X1B1	150040X1B1_chr_14	ST11	KL64	O1/O2v1	Entero_P4
NZ_CP047648.1	156070	156070_chr_1	ST11	KL47	OL101	Entero_SfI
NZ_CP047648.1	156070	156070_chr_2	ST11	KL47	OL101	Klebsi_ST437_OXA245phi4.1
NZ_CP047648.1	156070	156070_chr_3	ST11	KL47	OL101	Entero_P4
NZ_CP047648.1	156070	156070_chr_4	ST11	KL47	OL101	Klebsi_ST512_KPC3phi13.2
NZ_CP047648.1	156070	156070_chr_6	ST11	KL47	OL101	Klebsi_phiKO2
NZ_CP047648.1	156070	156070_chr_7	ST11	KL47	OL101	Salmon_SEN34
NZ_CP047648.1	156070	156070_chr_8	ST11	KL47	OL101	Pectob_ZF40
NZ_CP047648.1	156070	156070_chr_9	ST11	KL47	OL101	Escher_vB_EcoM_Schickermooser
NZ_CP047648.1	156070	156070_chr_10	ST11	KL47	OL101	Salmon_SPN1S
NZ_CP047648.1	156070	156070_chr_11	ST11	KL47	OL101	Entero_P4
NZ_CP047648.1	156070	156070_chr_12	ST11	KL47	OL101	Escher_503458
NZ_CP047649.1	158590	158590_chr_1	ST11	KL47	OL101	Entero_SfI
NZ_CP047649.1	158590	158590_chr_2	ST11	KL47	OL101	Klebsi_ST437_OXA245phi4.1
NZ_CP047649.1	158590	158590_chr_3	ST11	KL47	OL101	Escher_phiV10
NZ_CP047649.1	158590	158590_chr_4	ST11	KL47	OL101	Escher_phAPEC8
NZ_CP047649.1	158590	158590_chr_5	ST11	KL47	OL101	Pectob_ZF40
NZ_CP047649.1	158590	158590_chr_6	ST11	KL47	OL101	Salmon_SEN34
NZ_CP047649.1	158590	158590_chr_7	ST11	KL47	OL101	Escher_HK639
NZ_CP047649.1	158590	158590_chr_8	ST11	KL47	OL101	Klebsi_phiKO2
NZ_CP047649.1	158590	158590_chr_10	ST11	KL47	OL101	Klebsi_ST512_KPC3phi13.2
NZ_CP047649.1	158590	158590_chr_11	ST11	KL47	OL101	Entero_P4
NZ_CP047649.1	158590	158590_chr_12	ST11	KL47	OL101	Entero_P4
NZ_CP029689.1	160111	160111_chr_1	ST11	KL47	OL101	Escher_ESCO5
NZ_CP029689.1	160111	160111_chr_2	ST11	KL47	OL101	Escher_phiV10
NZ_CP029689.1	160111	160111_chr_3	ST11	KL47	OL101	Klebsi_ST437_OXA245phi4.1
NZ_CP029689.1	160111	160111_chr_4	ST11	KL47	OL101	Entero_SfI
NZ_CP029689.1	160111	160111_chr_5	ST11	KL47	OL101	Entero_P4
NZ_CP029689.1	160111	160111_chr_6	ST11	KL47	OL101	Entero_P4
NZ_CP029689.1	160111	160111_chr_7	ST11	KL47	OL101	Klebsi_ST512_KPC3phi13.2
NZ_CP029689.1	160111	160111_chr_9	ST11	KL47	OL101	Klebsi_phiKO2
NZ_CP029689.1	160111	160111_chr_10	ST11	KL47	OL101	Escher_HK639
NZ_CP029689.1	160111	160111_chr_11	ST11	KL47	OL101	Salmon_SEN34
NZ_CP083066.1	1613015451	1613015451_chr_1	ST1213	KL103	O1/O2v1	Entero_P4
NZ_CP083066.1	1613015451	1613015451_chr_2	ST1213	KL103	O1/O2v1	Escher_500465_1
NZ_CP083066.1	1613015451	1613015451_chr_3	ST1213	KL103	O1/O2v1	Edward_GF_2
NZ_CP083066.1	1613015451	1613015451_chr_4	ST1213	KL103	O1/O2v1	Bacill_G
NZ_CP083066.1	1613015451	1613015451_chr_5	ST1213	KL103	O1/O2v1	Entero_P1
NZ_CP083066.1	1613015451	1613015451_chr_6	ST1213	KL103	O1/O2v1	Ralsto_RSY1
NZ_CP083066.1	1613015451	1613015451_chr_7	ST1213	KL103	O1/O2v1	Salmon_SEN34
NZ_CP083066.1	1613015451	1613015451_chr_8	ST1213	KL103	O1/O2v1	Klebsi_ST16_OXA48phi5.4
NZ_CP083066.1	1613015451	1613015451_chr_9	ST1213	KL103	O1/O2v1	Klebsi_4LV2017
NZ_CP083066.1	1613015451	1613015451_chr_10	ST1213	KL103	O1/O2v1	Escher_RCS47
NZ_CP083063.1	1613163991	1613163991_chr_1	ST2719	KL81	OL101	Klebsi_ST13_OXA48phi12.1
NZ_CP083063.1	1613163991	1613163991_chr_2	ST2719	KL81	OL101	Escher_ESCO5
NZ_CP083063.1	1613163991	1613163991_chr_3	ST2719	KL81	OL101	Escher_HK639
NZ_CP083063.1	1613163991	1613163991_chr_5	ST2719	KL81	OL101	Klebsi_ST16_OXA48phi5.4
NZ_CP083063.1	1613163991	1613163991_chr_6	ST2719	KL81	OL101	Klebsi_3LV2017
NZ_CP083055.1	1613258639	1613258639_chr_1	ST231	KL51	O1/O2v2	Entero_P4
NZ_CP083055.1	1613258639	1613258639_chr_2	ST231	KL51	O1/O2v2	Escher_500465_1
NZ_CP083055.1	1613258639	1613258639_chr_3	ST231	KL51	O1/O2v2	Salmon_SEN34
NZ_CP083055.1	1613258639	1613258639_chr_4	ST231	KL51	O1/O2v2	Entero_c_1
NZ_CP083055.1	1613258639	1613258639_chr_5	ST231	KL51	O1/O2v2	Salmon_SEN8
NZ_CP083055.1	1613258639	1613258639_chr_6	ST231	KL51	O1/O2v2	Salmon_SEN34
NZ_CP083055.1	1613258639	1613258639_chr_7	ST231	KL51	O1/O2v2	Salmon_SJ46
NZ_CP084497.1	1632	1632_chr_1	ST11	KL47	OL101	Entero_SfI
NZ_CP084497.1	1632	1632_chr_2	ST11	KL47	OL101	Klebsi_ST437_OXA245phi4.1
NZ_CP084497.1	1632	1632_chr_3	ST11	KL47	OL101	Escher_phiV10
NZ_CP084497.1	1632	1632_chr_4	ST11	KL47	OL101	Entero_phi92
NZ_CP084497.1	1632	1632_chr_5	ST11	KL47	OL101	Edward_GF_2
NZ_CP084497.1	1632	1632_chr_6	ST11	KL47	OL101	Salmon_SEN34
NZ_CP084497.1	1632	1632_chr_7	ST11	KL47	OL101	Cronob_ENT39118
NZ_CP084497.1	1632	1632_chr_8	ST11	KL47	OL101	Escher_HK639
NZ_CP084497.1	1632	1632_chr_9	ST11	KL47	OL101	Klebsi_phiKO2
NZ_CP084497.1	1632	1632_chr_10	ST11	KL47	OL101	Klebsi_ST512_KPC3phi13.2
NZ_CP084497.1	1632	1632_chr_11	ST11	KL47	OL101	Entero_P4
NZ_CP084497.1	1632	1632_chr_12	ST11	KL47	OL101	Entero_P4
NZ_CP051161.1	16BU137	16BU137_chr_1	ST37	KL25	O5	Escher_500465_1
NZ_CP051161.1	16BU137	16BU137_chr_2	ST37	KL25	O5	Microc_MaMV_DC
NZ_CP051161.1	16BU137	16BU137_chr_3	ST37	KL25	O5	Entero_mEp237
NZ_CP051161.1	16BU137	16BU137_chr_4	ST37	KL25	O5	Klebsi_ST16_OXA48phi5.4
NZ_CP051161.1	16BU137	16BU137_chr_5	ST37	KL25	O5	Klebsi_phiKO2
NZ_CP051161.1	16BU137	16BU137_chr_6	ST37	KL25	O5	Klebsi_ST512_KPC3phi13.2
NZ_CP051161.1	16BU137	16BU137_chr_7	ST37	KL25	O5	Entero_P4
NZ_CP045263.1	16HN-263	16HN-263_chr_1	ST11	KL47	OL101	Salmon_ST64B
NZ_CP045263.1	16HN-263	16HN-263_chr_2	ST11	KL47	OL101	Klebsi_ST437_OXA245phi4.1
NZ_CP045263.1	16HN-263	16HN-263_chr_3	ST11	KL47	OL101	Salmon_118970_sal3
NZ_CP045263.1	16HN-263	16HN-263_chr_4	ST11	KL47	OL101	Escher_phiV10
NZ_CP045263.1	16HN-263	16HN-263_chr_5	ST11	KL47	OL101	Entero_phi92
NZ_CP045263.1	16HN-263	16HN-263_chr_6	ST11	KL47	OL101	Salmon_SEN34
NZ_CP045263.1	16HN-263	16HN-263_chr_7	ST11	KL47	OL101	Entero_P1
NZ_CP045263.1	16HN-263	16HN-263_chr_8	ST11	KL47	OL101	Escher_HK639
NZ_CP045263.1	16HN-263	16HN-263_chr_9	ST11	KL47	OL101	Klebsi_phiKO2
NZ_CP045263.1	16HN-263	16HN-263_chr_10	ST11	KL47	OL101	Klebsi_ST512_KPC3phi13.2
NZ_CP045263.1	16HN-263	16HN-263_chr_11	ST11	KL47	OL101	Entero_P4
NZ_CP045263.1	16HN-263	16HN-263_chr_12	ST11	KL47	OL101	Entero_P4
NZ_CP027036.1	16_GR_13	16_GR_13_chr_1	ST11	KL15	O4	Entero_SfI
NZ_CP027036.1	16_GR_13	16_GR_13_chr_2	ST11	KL15	O4	Entero_P4
NZ_CP027036.1	16_GR_13	16_GR_13_chr_3	ST11	KL15	O4	Entero_P4
NZ_CP027036.1	16_GR_13	16_GR_13_chr_4	ST11	KL15	O4	Erwini_vB_EhrS_59
NZ_CP027036.1	16_GR_13	16_GR_13_chr_5	ST11	KL15	O4	Klebsi_4LV2017
NZ_CP027036.1	16_GR_13	16_GR_13_chr_6	ST11	KL15	O4	Salmon_SEN34
NZ_CP027036.1	16_GR_13	16_GR_13_chr_7	ST11	KL15	O4	Escher_500465_1
NZ_CP019219.1	1756	1756_chr_1	ST2549	KL8	O1/O2v1	Escher_500465_1
NZ_CP019219.1	1756	1756_chr_2	ST2549	KL8	O1/O2v1	Entero_c_1
NZ_CP019219.1	1756	1756_chr_3	ST2549	KL8	O1/O2v1	Pseudo_phiPSA1
NZ_CP041927.1	18-2374	18-2374_chr_1	ST16	KL51	O3b	Entero_HK140
NZ_CP041927.1	18-2374	18-2374_chr_2	ST16	KL51	O3b	Escher_500465_1
NZ_CP041927.1	18-2374	18-2374_chr_3	ST16	KL51	O3b	Erwini_vB_EhrS_59
NZ_CP041927.1	18-2374	18-2374_chr_4	ST16	KL51	O3b	Klebsi_ST16_OXA48phi5.4
NZ_CP041927.1	18-2374	18-2374_chr_5	ST16	KL51	O3b	Salmon_SEN34
NZ_CP041927.1	18-2374	18-2374_chr_6	ST16	KL51	O3b	Entero_HK140
NZ_CP084492.1	1864	1864_chr_1	ST11	KL47	OL101	Entero_SfI
NZ_CP084492.1	1864	1864_chr_2	ST11	KL47	OL101	Escher_RCS47
NZ_CP084492.1	1864	1864_chr_3	ST11	KL47	OL101	Klebsi_ST437_OXA245phi4.1
NZ_CP084492.1	1864	1864_chr_4	ST11	KL47	OL101	Escher_phiV10
NZ_CP084492.1	1864	1864_chr_5	ST11	KL47	OL101	Entero_phi92
NZ_CP084492.1	1864	1864_chr_6	ST11	KL47	OL101	Salmon_SEN34
NZ_CP084492.1	1864	1864_chr_7	ST11	KL47	OL101	Cronob_ENT39118
NZ_CP084492.1	1864	1864_chr_8	ST11	KL47	OL101	Escher_HK639
NZ_CP084492.1	1864	1864_chr_9	ST11	KL47	OL101	Klebsi_phiKO2
NZ_CP084492.1	1864	1864_chr_10	ST11	KL47	OL101	Klebsi_ST512_KPC3phi13.2
NZ_CP084492.1	1864	1864_chr_11	ST11	KL47	OL101	Entero_P4
NZ_CP084492.1	1864	1864_chr_12	ST11	KL47	OL101	Entero_P4
NZ_CP084492.1	1864	1864_chr_13	ST11	KL47	OL101	Bacill_vB_BtS_BMBtp14
NZ_CP034778.1	18CPO060	18CPO060_chr_1	ST86	KL2	O1/O2v1	Escher_500465_1
NZ_CP034778.1	18CPO060	18CPO060_chr_2	ST86	KL2	O1/O2v1	Entero_phiP27
NZ_CP034778.1	18CPO060	18CPO060_chr_3	ST86	KL2	O1/O2v1	Entero_HK140
NZ_CP034778.1	18CPO060	18CPO060_chr_4	ST86	KL2	O1/O2v1	Salmon_118970_sal3
NZ_CP039936.1	18KM1950	18KM1950_chr_1	ST11	KL105	O1/O2v2	Shigel_SfIV
NZ_CP039936.1	18KM1950	18KM1950_chr_2	ST11	KL105	O1/O2v2	Escher_500465_1
NZ_CP039936.1	18KM1950	18KM1950_chr_3	ST11	KL105	O1/O2v2	Salmon_SEN34
NZ_CP039936.1	18KM1950	18KM1950_chr_4	ST11	KL105	O1/O2v2	Salmon_SEN34
NZ_CP039936.1	18KM1950	18KM1950_chr_5	ST11	KL105	O1/O2v2	Cronob_ENT39118
NZ_CP039936.1	18KM1950	18KM1950_chr_6	ST11	KL105	O1/O2v2	Escher_HK639
NZ_CP039936.1	18KM1950	18KM1950_chr_7	ST11	KL105	O1/O2v2	Klebsi_ST512_KPC3phi13.2
NZ_CP039936.1	18KM1950	18KM1950_chr_8	ST11	KL105	O1/O2v2	Entero_P4
NZ_CP039951.1	18KM2445b	18KM2445b_chr_1	ST307	KL102	O1/O2v2	Salmon_SEN34
NZ_CP039951.1	18KM2445b	18KM2445b_chr_2	ST307	KL102	O1/O2v2	Synech_S_CBS3
NZ_CP039951.1	18KM2445b	18KM2445b_chr_4	ST307	KL102	O1/O2v2	Escher_500465_1
NZ_CP039951.1	18KM2445b	18KM2445b_chr_5	ST307	KL102	O1/O2v2	Salmon_118970_sal3
NZ_CP039951.1	18KM2445b	18KM2445b_chr_6	ST307	KL102	O1/O2v2	Erwini_vB_EhrS_59
NZ_CP039939.1	18KM2517	18KM2517_chr_1	ST11	KL105	O1/O2v2	Salmon_ST64B
NZ_CP039939.1	18KM2517	18KM2517_chr_2	ST11	KL105	O1/O2v2	Escher_500465_1
NZ_CP039939.1	18KM2517	18KM2517_chr_3	ST11	KL105	O1/O2v2	Salmon_SEN34
NZ_CP039939.1	18KM2517	18KM2517_chr_4	ST11	KL105	O1/O2v2	Salmon_SEN34
NZ_CP039939.1	18KM2517	18KM2517_chr_5	ST11	KL105	O1/O2v2	Bacill_SPbeta
NZ_CP039939.1	18KM2517	18KM2517_chr_6	ST11	KL105	O1/O2v2	Escher_HK639
NZ_CP039939.1	18KM2517	18KM2517_chr_7	ST11	KL105	O1/O2v2	Klebsi_ST512_KPC3phi13.2
NZ_CP039939.1	18KM2517	18KM2517_chr_8	ST11	KL105	O1/O2v2	Entero_P4
NZ_CP039942.1	18KM2813	18KM2813_chr_1	ST11	KL105	O1/O2v2	Salmon_ST64B
NZ_CP039942.1	18KM2813	18KM2813_chr_2	ST11	KL105	O1/O2v2	Escher_500465_1
NZ_CP039942.1	18KM2813	18KM2813_chr_3	ST11	KL105	O1/O2v2	Salmon_SEN34
NZ_CP039942.1	18KM2813	18KM2813_chr_4	ST11	KL105	O1/O2v2	Salmon_SEN34
NZ_CP039942.1	18KM2813	18KM2813_chr_5	ST11	KL105	O1/O2v2	Staphy_SPbeta_like
NZ_CP039942.1	18KM2813	18KM2813_chr_6	ST11	KL105	O1/O2v2	Escher_HK639
NZ_CP039942.1	18KM2813	18KM2813_chr_7	ST11	KL105	O1/O2v2	Klebsi_ST512_KPC3phi13.2
NZ_CP039942.1	18KM2813	18KM2813_chr_8	ST11	KL105	O1/O2v2	Entero_P4
NZ_CP022023.1	19051	19051_chr_1	ST15	KL24	O1/O2v1	Salmon_118970_sal3
NZ_CP022023.1	19051	19051_chr_2	ST15	KL24	O1/O2v1	Escher_500465_1
NZ_CP022023.1	19051	19051_chr_3	ST15	KL24	O1/O2v1	Edward_GF_2
NZ_CP022023.1	19051	19051_chr_4	ST15	KL24	O1/O2v1	Salmon_SJ46
NZ_CP064174.1	19110124	19110124_chr_1	ST340	KL15	O4	Escher_pro483
NZ_CP064174.1	19110124	19110124_chr_2	ST340	KL15	O4	Escher_503458
NZ_CP064174.1	19110124	19110124_chr_3	ST340	KL15	O4	Entero_P4
NZ_CP064174.1	19110124	19110124_chr_4	ST340	KL15	O4	Entero_P4
NZ_CP064174.1	19110124	19110124_chr_5	ST340	KL15	O4	Klebsi_ST16_OXA48phi5.4
NZ_CP064174.1	19110124	19110124_chr_6	ST340	KL15	O4	Escher_HK639
NZ_CP064174.1	19110124	19110124_chr_7	ST340	KL15	O4	Staphy_SPbeta_like
NZ_CP064174.1	19110124	19110124_chr_8	ST340	KL15	O4	Salmon_SEN34
NZ_CP064174.1	19110124	19110124_chr_9	ST340	KL15	O4	Escher_500465_1
NZ_CP064174.1	19110124	19110124_chr_10	ST340	KL15	O4	Shigel_SfIV
NZ_CP103729.1	197	197_chr_1	ST280	KL23	OL102	Klebsi_ST147_VIM1phi7.1
NZ_CP103729.1	197	197_chr_2	ST280	KL23	OL102	Escher_500465_1
NZ_CP103729.1	197	197_chr_4	ST280	KL23	OL102	Entero_HK022
NZ_CP103729.1	197	197_chr_6	ST280	KL23	OL102	Entero_mEp237
NZ_CP103729.1	197	197_chr_7	ST280	KL23	OL102	Klebsi_phiKO2
NZ_CP103729.1	197	197_chr_8	ST280	KL23	OL102	Cronob_ENT47670
NZ_CP049950.1	19KM1053	19KM1053_chr_1	ST11	KL105	O1/O2v2	Salmon_118970_sal3
NZ_CP049950.1	19KM1053	19KM1053_chr_2	ST11	KL105	O1/O2v2	Escher_500465_1
NZ_CP049950.1	19KM1053	19KM1053_chr_3	ST11	KL105	O1/O2v2	Salmon_SEN34
NZ_CP049950.1	19KM1053	19KM1053_chr_4	ST11	KL105	O1/O2v2	Salmon_SEN34
NZ_CP049950.1	19KM1053	19KM1053_chr_5	ST11	KL105	O1/O2v2	Cronob_ENT39118
NZ_CP049950.1	19KM1053	19KM1053_chr_6	ST11	KL105	O1/O2v2	Escher_HK639
NZ_CP049950.1	19KM1053	19KM1053_chr_7	ST11	KL105	O1/O2v2	Klebsi_ST512_KPC3phi13.2
NZ_CP049950.1	19KM1053	19KM1053_chr_8	ST11	KL105	O1/O2v2	Entero_P4
NZ_CP049953.1	19KM1109	19KM1109_chr_1	ST11	KL105	O1/O2v2	Entero_SfI
NZ_CP049953.1	19KM1109	19KM1109_chr_2	ST11	KL105	O1/O2v2	Escher_500465_1
NZ_CP049953.1	19KM1109	19KM1109_chr_3	ST11	KL105	O1/O2v2	Salmon_SEN34
NZ_CP049953.1	19KM1109	19KM1109_chr_4	ST11	KL105	O1/O2v2	Entero_lambda
NZ_CP049953.1	19KM1109	19KM1109_chr_5	ST11	KL105	O1/O2v2	Salmon_SEN34
NZ_CP049953.1	19KM1109	19KM1109_chr_6	ST11	KL105	O1/O2v2	Escher_RCS47
NZ_CP049953.1	19KM1109	19KM1109_chr_7	ST11	KL105	O1/O2v2	Escher_HK639
NZ_CP049953.1	19KM1109	19KM1109_chr_8	ST11	KL105	O1/O2v2	Klebsi_ST512_KPC3phi13.2
NZ_CP049953.1	19KM1109	19KM1109_chr_9	ST11	KL105	O1/O2v2	Entero_P4
NZ_CP049953.1	19KM1109	19KM1109_chr_10	ST11	KL105	O1/O2v2	Bacill_vB_BtS_BMBtp14
NZ_CP049947.1	19KM267	19KM267_chr_1	ST11	KL105	O1/O2v2	Entero_SfI
NZ_CP049947.1	19KM267	19KM267_chr_2	ST11	KL105	O1/O2v2	Escher_500465_1
NZ_CP049947.1	19KM267	19KM267_chr_3	ST11	KL105	O1/O2v2	Salmon_SEN34
NZ_CP049947.1	19KM267	19KM267_chr_4	ST11	KL105	O1/O2v2	Salmon_SEN34
NZ_CP049947.1	19KM267	19KM267_chr_5	ST11	KL105	O1/O2v2	Escher_RCS47
NZ_CP049947.1	19KM267	19KM267_chr_6	ST11	KL105	O1/O2v2	Escher_HK639
NZ_CP049947.1	19KM267	19KM267_chr_7	ST11	KL105	O1/O2v2	Klebsi_ST512_KPC3phi13.2
NZ_CP049947.1	19KM267	19KM267_chr_8	ST11	KL105	O1/O2v2	Entero_P4
NZ_CP039945.1	19KM28	19KM28_chr_1	ST11	KL105	O1/O2v2	Shigel_SfIV
NZ_CP039945.1	19KM28	19KM28_chr_2	ST11	KL105	O1/O2v2	Escher_500465_1
NZ_CP039945.1	19KM28	19KM28_chr_3	ST11	KL105	O1/O2v2	Salmon_SEN34
NZ_CP039945.1	19KM28	19KM28_chr_4	ST11	KL105	O1/O2v2	Salmon_SEN34
NZ_CP039945.1	19KM28	19KM28_chr_5	ST11	KL105	O1/O2v2	Staphy_SPbeta_like
NZ_CP039945.1	19KM28	19KM28_chr_6	ST11	KL105	O1/O2v2	Escher_HK639
NZ_CP039945.1	19KM28	19KM28_chr_7	ST11	KL105	O1/O2v2	Klebsi_ST512_KPC3phi13.2
NZ_CP039945.1	19KM28	19KM28_chr_8	ST11	KL105	O1/O2v2	Entero_P4
NZ_CP039948.1	19KM57	19KM57_chr_1	ST11	KL105	O1/O2v2	Entero_SfI
NZ_CP039948.1	19KM57	19KM57_chr_2	ST11	KL105	O1/O2v2	Escher_500465_1
NZ_CP039948.1	19KM57	19KM57_chr_3	ST11	KL105	O1/O2v2	Salmon_SEN34
NZ_CP039948.1	19KM57	19KM57_chr_4	ST11	KL105	O1/O2v2	Salmon_SEN34
NZ_CP039948.1	19KM57	19KM57_chr_5	ST11	KL105	O1/O2v2	Cronob_ENT39118
NZ_CP039948.1	19KM57	19KM57_chr_6	ST11	KL105	O1/O2v2	Escher_HK639
NZ_CP039948.1	19KM57	19KM57_chr_7	ST11	KL105	O1/O2v2	Klebsi_ST512_KPC3phi13.2
NZ_CP039948.1	19KM57	19KM57_chr_8	ST11	KL105	O1/O2v2	Entero_P4
NZ_CP051159.1	19PDR22	19PDR22_chr_1	ST11	KL47	OL101	Edward_GF_2
NZ_CP051159.1	19PDR22	19PDR22_chr_2	ST11	KL47	OL101	Pectob_ZF40
NZ_CP051159.1	19PDR22	19PDR22_chr_3	ST11	KL47	OL101	Escher_ESCO5
NZ_CP051159.1	19PDR22	19PDR22_chr_4	ST11	KL47	OL101	Escher_phiV10
NZ_CP051159.1	19PDR22	19PDR22_chr_5	ST11	KL47	OL101	Klebsi_ST437_OXA245phi4.1
NZ_CP051159.1	19PDR22	19PDR22_chr_6	ST11	KL47	OL101	Escher_RCS47
NZ_CP051159.1	19PDR22	19PDR22_chr_7	ST11	KL47	OL101	Escher_RCS47
NZ_CP051159.1	19PDR22	19PDR22_chr_8	ST11	KL47	OL101	Salmon_118970_sal3
NZ_CP051159.1	19PDR22	19PDR22_chr_9	ST11	KL47	OL101	Entero_P4
NZ_CP051159.1	19PDR22	19PDR22_chr_10	ST11	KL47	OL101	Entero_P4
NZ_CP051159.1	19PDR22	19PDR22_chr_11	ST11	KL47	OL101	Klebsi_ST512_KPC3phi13.2
NZ_CP051159.1	19PDR22	19PDR22_chr_12	ST11	KL47	OL101	Klebsi_phiKO2
NZ_CP097237.1	1	1_chr_1	ST14	KL2	O1/O2v1	Entero_phiP27
NZ_CP097237.1	1	1_chr_2	ST14	KL2	O1/O2v1	Escher_HK639
NZ_CP097237.1	1	1_chr_4	ST14	KL2	O1/O2v1	Erwini_vB_EhrS_59
NZ_CP027042.1	1_GR_13	1_GR_13_chr_1	ST147	KL64	O1/O2v1	Klebsi_ST147_VIM1phi7.1
NZ_CP027042.1	1_GR_13	1_GR_13_chr_2	ST147	KL64	O1/O2v1	Escher_vB_EcoM_Schickermooser
NZ_CP027042.1	1_GR_13	1_GR_13_chr_3	ST147	KL64	O1/O2v1	Entero_HK544
NZ_CP027042.1	1_GR_13	1_GR_13_chr_4	ST147	KL64	O1/O2v1	Bacill_vB_BtS_BMBtp14
NZ_CP031562.1	2-1	2-1_chr_1	ST726	KL14	O3b	Escher_500465_1
NZ_CP031562.1	2-1	2-1_chr_2	ST726	KL14	O3b	Entero_mEp237
NZ_CP055293.1	200	200_chr_1	ST37	KL146	O12	Escher_500465_1
NZ_CP055293.1	200	200_chr_2	ST37	KL146	O12	Escher_vB_EcoM_Schickermooser
NZ_CP055293.1	200	200_chr_3	ST37	KL146	O12	Escher_HK639
NZ_CP065034.1	2016-1400	2016-1400_chr_1	ST1035	KL57	O1/O2v2	Burkho_phi1026b
NZ_CP065034.1	2016-1400	2016-1400_chr_2	ST1035	KL57	O1/O2v2	Entero_c_1
NZ_CP065034.1	2016-1400	2016-1400_chr_3	ST1035	KL57	O1/O2v2	Klebsi_4LV2017
NZ_CP068015.1	2016_49	2016_49_chr_1	ST23	KL1	O1/O2v2	Salmon_SPN1S
NZ_CP068015.1	2016_49	2016_49_chr_2	ST23	KL1	O1/O2v2	Erwini_vB_EhrS_59
NZ_CP068015.1	2016_49	2016_49_chr_3	ST23	KL1	O1/O2v2	Mycoba_RhynO
NZ_CP068015.1	2016_49	2016_49_chr_4	ST23	KL1	O1/O2v2	Aeromo_vB_AsaM_56
NZ_CP068015.1	2016_49	2016_49_chr_5	ST23	KL1	O1/O2v2	Salmon_118970_sal3
NZ_CP068015.1	2016_49	2016_49_chr_6	ST23	KL1	O1/O2v2	Klebsi_phiKO2
NZ_CP068015.1	2016_49	2016_49_chr_7	ST23	KL1	O1/O2v2	Escher_RCS47
NZ_CP044368.1	2018C01-046	2018C01-046_chr_1	newST	KL102	O1/O2v2	Escher_SH2026Stx1
NZ_CP044368.1	2018C01-046	2018C01-046_chr_2	newST	KL102	O1/O2v2	Klebsi_4LV2017
NZ_CP044368.1	2018C01-046	2018C01-046_chr_3	newST	KL102	O1/O2v2	Escher_RCS47
NZ_CP044368.1	2018C01-046	2018C01-046_chr_4	newST	KL102	O1/O2v2	Klebsi_ST16_OXA48phi5.4
NZ_CP044368.1	2018C01-046	2018C01-046_chr_5	newST	KL102	O1/O2v2	Salmon_118970_sal3
NZ_CP044368.1	2018C01-046	2018C01-046_chr_6	newST	KL102	O1/O2v2	Escher_500465_1
NZ_CP044368.1	2018C01-046	2018C01-046_chr_7	newST	KL102	O1/O2v2	Strept_PapayaSalad
NZ_CP044385.1	2018C01-239	2018C01-239_chr_1	newST	KL15	O4	Pseudo_OBP
NZ_CP044385.1	2018C01-239	2018C01-239_chr_2	newST	KL15	O4	Entero_P1
NZ_CP044385.1	2018C01-239	2018C01-239_chr_3	newST	KL15	O4	Salmon_118970_sal3
NZ_CP044385.1	2018C01-239	2018C01-239_chr_4	newST	KL15	O4	Escher_RCS47
NZ_CP044385.1	2018C01-239	2018C01-239_chr_5	newST	KL15	O4	Escher_500465_1
NZ_CP044393.1	2018N16-148	2018N16-148_chr_1	newST	KL123	O5	Escher_RCS47
NZ_CP044393.1	2018N16-148	2018N16-148_chr_2	newST	KL123	O5	Klebsi_phiKO2
NZ_CP044393.1	2018N16-148	2018N16-148_chr_3	newST	KL123	O5	Salmon_118970_sal3
NZ_CP044393.1	2018N16-148	2018N16-148_chr_4	newST	KL123	O5	Escher_500465_1
NZ_CP044389.1	2018N17-066	2018N17-066_chr_1	newST	KL148	O1/O2v2	Stx2_c_Stx2a_F451
NZ_CP044389.1	2018N17-066	2018N17-066_chr_2	newST	KL148	O1/O2v2	Cronob_ENT39118
NZ_CP044389.1	2018N17-066	2018N17-066_chr_3	newST	KL148	O1/O2v2	Salmon_118970_sal3
NZ_CP044389.1	2018N17-066	2018N17-066_chr_4	newST	KL148	O1/O2v2	Entero_c_1
NZ_CP044389.1	2018N17-066	2018N17-066_chr_5	newST	KL148	O1/O2v2	Stx2_c_1717
NZ_CP044389.1	2018N17-066	2018N17-066_chr_6	newST	KL148	O1/O2v2	Escher_500465_1
NZ_CP044376.1	2018S06-082	2018S06-082_chr_1	newST	KL149	O1/O2v2	Escher_vB_EcoM_Schickermooser
NZ_CP044376.1	2018S06-082	2018S06-082_chr_2	newST	KL149	O1/O2v2	Mycoba_Turbido
NZ_CP044376.1	2018S06-082	2018S06-082_chr_3	newST	KL149	O1/O2v2	Pseudo_PS_1
NZ_CP044376.1	2018S06-082	2018S06-082_chr_4	newST	KL149	O1/O2v2	Escher_HK639
NZ_CP044376.1	2018S06-082	2018S06-082_chr_6	newST	KL149	O1/O2v2	Escher_RCS47
NZ_CP044376.1	2018S06-082	2018S06-082_chr_7	newST	KL149	O1/O2v2	Bacill_vB_BtS_BMBtp14
NZ_CP044376.1	2018S06-082	2018S06-082_chr_8	newST	KL149	O1/O2v2	Escher_500465_1
NZ_CP044380.1	2018S07-013	2018S07-013_chr_1	newST	KL111	O3/O3a	Cronob_vB_CsaP_009
NZ_CP044380.1	2018S07-013	2018S07-013_chr_2	newST	KL111	O3/O3a	Klebsi_ST16_OXA48phi5.4
NZ_CP044380.1	2018S07-013	2018S07-013_chr_3	newST	KL111	O3/O3a	Klebsi_ST15_OXA48phi14.1
NZ_CP044380.1	2018S07-013	2018S07-013_chr_4	newST	KL111	O3/O3a	Escher_500465_1
NZ_CP047336.1	2019036D	2019036D_chr_1	ST395	KL102	O1/O2v2	Entero_P4
NZ_CP047336.1	2019036D	2019036D_chr_2	ST395	KL102	O1/O2v2	Klebsi_ST512_KPC3phi13.2
NZ_CP047336.1	2019036D	2019036D_chr_3	ST395	KL102	O1/O2v2	Salmon_118970_sal3
NZ_CP047336.1	2019036D	2019036D_chr_4	ST395	KL102	O1/O2v2	Klebsi_ST147_VIM1phi7.1
NZ_CP047336.1	2019036D	2019036D_chr_5	ST395	KL102	O1/O2v2	Escher_500465_1
NZ_CP047336.1	2019036D	2019036D_chr_6	ST395	KL102	O1/O2v2	Entero_phiP27
NZ_CP047336.1	2019036D	2019036D_chr_7	ST395	KL102	O1/O2v2	Paenib_Leyra
NZ_CP047336.1	2019036D	2019036D_chr_8	ST395	KL102	O1/O2v2	Escher_RCS47
NZ_CP104659.1	2020CK-00096	2020CK-00096_chr_1	ST307	KL102	O1/O2v2	Escher_HK639
NZ_CP104659.1	2020CK-00096	2020CK-00096_chr_2	ST307	KL102	O1/O2v2	Salmon_118970_sal3
NZ_CP104659.1	2020CK-00096	2020CK-00096_chr_3	ST307	KL102	O1/O2v2	Escher_HK639
NZ_CP104659.1	2020CK-00096	2020CK-00096_chr_4	ST307	KL102	O1/O2v2	Escher_500465_1
NZ_CP104659.1	2020CK-00096	2020CK-00096_chr_5	ST307	KL102	O1/O2v2	Burkho_phi1026b
NZ_CP104659.1	2020CK-00096	2020CK-00096_chr_6	ST307	KL102	O1/O2v2	Escher_HK639
NZ_CP104678.1	2021CK-00608	2021CK-00608_chr_1	ST15	KL24	O1/O2v1	Klebsi_ST15_OXA48phi14.1
NZ_CP104678.1	2021CK-00608	2021CK-00608_chr_2	ST15	KL24	O1/O2v1	Entero_HK140
NZ_CP104678.1	2021CK-00608	2021CK-00608_chr_3	ST15	KL24	O1/O2v1	Salmon_SJ46
NZ_CP104678.1	2021CK-00608	2021CK-00608_chr_4	ST15	KL24	O1/O2v1	Klebsi_ST16_OXA48phi5.4
NZ_CP104678.1	2021CK-00608	2021CK-00608_chr_5	ST15	KL24	O1/O2v1	Salmon_118970_sal3
NZ_CP104660.1	2021CK-01729	2021CK-01729_chr_2	ST133	KL116	O1/O2v1	Escher_500465_1
NZ_CP104660.1	2021CK-01729	2021CK-01729_chr_3	ST133	KL116	O1/O2v1	Escher_phiV10
NZ_CP104660.1	2021CK-01729	2021CK-01729_chr_4	ST133	KL116	O1/O2v1	Entero_SfV
NZ_CP104373.1	2021CK-01815	2021CK-01815_chr_2	ST133	KL116	O1/O2v1	Escher_500465_1
NZ_CP104373.1	2021CK-01815	2021CK-01815_chr_3	ST133	KL116	O1/O2v1	Escher_phiV10
NZ_CP104373.1	2021CK-01815	2021CK-01815_chr_4	ST133	KL116	O1/O2v1	Entero_SfV
NZ_CP021165.1	203	203_chr_1	ST983	KL127	OL101	Pseudo_PMG1
NZ_CP021165.1	203	203_chr_2	ST983	KL127	OL101	Escher_500465_1
NZ_CP021165.1	203	203_chr_3	ST983	KL127	OL101	Entero_phi92
NZ_CP021165.1	203	203_chr_4	ST983	KL127	OL101	Entero_mEp237
NZ_CP021165.1	203	203_chr_5	ST983	KL127	OL101	Salmon_118970_sal3
NZ_CP021165.1	203	203_chr_6	ST983	KL127	OL101	Bacill_vB_BtS_BMBtp14
NZ_CP030302.1	205880	205880_chr_1	ST290	KL21	O1/O2v1	Escher_500465_1
NZ_CP030302.1	205880	205880_chr_2	ST290	KL21	O1/O2v1	Salmon_118970_sal3
NZ_CP030302.1	205880	205880_chr_3	ST290	KL21	O1/O2v1	Pseudo_PS_1
NZ_CP030302.1	205880	205880_chr_4	ST290	KL21	O1/O2v1	Klebsi_ST16_OXA48phi5.4
NZ_CP027048.1	20_GR_12	20_GR_12_chr_1	ST258	KL106	O1/O2v2	Entero_SfI
NZ_CP027048.1	20_GR_12	20_GR_12_chr_2	ST258	KL106	O1/O2v2	Escher_500465_1
NZ_CP027048.1	20_GR_12	20_GR_12_chr_3	ST258	KL106	O1/O2v2	Escher_TL_2011b
NZ_CP027048.1	20_GR_12	20_GR_12_chr_4	ST258	KL106	O1/O2v2	Microc_Ma_LMM01
NZ_CP027048.1	20_GR_12	20_GR_12_chr_5	ST258	KL106	O1/O2v2	Salmon_SEN34
NZ_CP027048.1	20_GR_12	20_GR_12_chr_6	ST258	KL106	O1/O2v2	Escher_HK639
NZ_CP027048.1	20_GR_12	20_GR_12_chr_7	ST258	KL106	O1/O2v2	Klebsi_ST512_KPC3phi13.2
NZ_CP027048.1	20_GR_12	20_GR_12_chr_8	ST258	KL106	O1/O2v2	Entero_P4
NZ_CP027048.1	20_GR_12	20_GR_12_chr_9	ST258	KL106	O1/O2v2	Entero_P4
NZ_CP027048.1	20_GR_12	20_GR_12_chr_10	ST258	KL106	O1/O2v2	Bacill_vB_BtS_BMBtp14
NZ_CP095234.1	21072329	21072329_chr_1	ST11	KL47	OL101	Cronob_ENT39118
NZ_CP095234.1	21072329	21072329_chr_2	ST11	KL47	OL101	Entero_phi80
NZ_CP095234.1	21072329	21072329_chr_3	ST11	KL47	OL101	Klebsi_phiKO2
NZ_CP095234.1	21072329	21072329_chr_4	ST11	KL47	OL101	Klebsi_ST512_KPC3phi13.2
NZ_CP095234.1	21072329	21072329_chr_5	ST11	KL47	OL101	Entero_P4
NZ_CP095234.1	21072329	21072329_chr_6	ST11	KL47	OL101	Entero_P4
NZ_CP095234.1	21072329	21072329_chr_7	ST11	KL47	OL101	Bacill_vB_BtS_BMBtp14
NZ_CP095234.1	21072329	21072329_chr_8	ST11	KL47	OL101	Entero_SfI
NZ_CP095234.1	21072329	21072329_chr_9	ST11	KL47	OL101	Escher_RCS47
NZ_CP095234.1	21072329	21072329_chr_10	ST11	KL47	OL101	Klebsi_ST437_OXA245phi4.1
NZ_CP095234.1	21072329	21072329_chr_11	ST11	KL47	OL101	Escher_phiV10
NZ_CP095234.1	21072329	21072329_chr_12	ST11	KL47	OL101	Escher_ESCO5
NZ_CP095234.1	21072329	21072329_chr_13	ST11	KL47	OL101	Edward_GF_2
NZ_CP095240.1	21080237	21080237_chr_1	ST11	KL64	O1/O2v1	Entero_phi92
NZ_CP095240.1	21080237	21080237_chr_2	ST11	KL64	O1/O2v1	Escher_phiV10
NZ_CP095240.1	21080237	21080237_chr_3	ST11	KL64	O1/O2v1	Klebsi_ST437_OXA245phi4.1
NZ_CP095240.1	21080237	21080237_chr_4	ST11	KL64	O1/O2v1	Salmon_ST64B
NZ_CP095240.1	21080237	21080237_chr_5	ST11	KL64	O1/O2v1	Bacill_vB_BtS_BMBtp14
NZ_CP095240.1	21080237	21080237_chr_6	ST11	KL64	O1/O2v1	Entero_P4
NZ_CP095240.1	21080237	21080237_chr_7	ST11	KL64	O1/O2v1	Entero_P4
NZ_CP095240.1	21080237	21080237_chr_8	ST11	KL64	O1/O2v1	Klebsi_ST512_KPC3phi13.2
NZ_CP095240.1	21080237	21080237_chr_9	ST11	KL64	O1/O2v1	Klebsi_phiKO2
NZ_CP095240.1	21080237	21080237_chr_10	ST11	KL64	O1/O2v1	Escher_HK639
NZ_CP095247.1	21080534	21080534_chr_1	ST11	KL64	O1/O2v1	Salmon_ST64B
NZ_CP095247.1	21080534	21080534_chr_2	ST11	KL64	O1/O2v1	Klebsi_ST437_OXA245phi4.1
NZ_CP095247.1	21080534	21080534_chr_3	ST11	KL64	O1/O2v1	Escher_phiV10
NZ_CP095247.1	21080534	21080534_chr_4	ST11	KL64	O1/O2v1	Escher_vB_EcoM_Schickermooser
NZ_CP095247.1	21080534	21080534_chr_5	ST11	KL64	O1/O2v1	Salmon_SEN34
NZ_CP095247.1	21080534	21080534_chr_6	ST11	KL64	O1/O2v1	Escher_RCS47
NZ_CP095247.1	21080534	21080534_chr_7	ST11	KL64	O1/O2v1	Escher_HK639
NZ_CP095247.1	21080534	21080534_chr_8	ST11	KL64	O1/O2v1	Klebsi_phiKO2
NZ_CP095247.1	21080534	21080534_chr_9	ST11	KL64	O1/O2v1	Entero_mEp237
NZ_CP095247.1	21080534	21080534_chr_10	ST11	KL64	O1/O2v1	Entero_c_1
NZ_CP095247.1	21080534	21080534_chr_11	ST11	KL64	O1/O2v1	Klebsi_ST512_KPC3phi13.2
NZ_CP095247.1	21080534	21080534_chr_12	ST11	KL64	O1/O2v1	Entero_P4
NZ_CP095247.1	21080534	21080534_chr_13	ST11	KL64	O1/O2v1	Entero_P4
NZ_CP095247.1	21080534	21080534_chr_14	ST11	KL64	O1/O2v1	Escher_503458
NZ_CP095253.1	21080937	21080937_chr_1	ST11	KL64	O1/O2v1	Klebsi_phiKO2
NZ_CP095253.1	21080937	21080937_chr_2	ST11	KL64	O1/O2v1	Klebsi_ST512_KPC3phi13.2
NZ_CP095253.1	21080937	21080937_chr_3	ST11	KL64	O1/O2v1	Entero_P4
NZ_CP095253.1	21080937	21080937_chr_4	ST11	KL64	O1/O2v1	Entero_P4
NZ_CP095253.1	21080937	21080937_chr_5	ST11	KL64	O1/O2v1	Bacill_vB_BtS_BMBtp14
NZ_CP095253.1	21080937	21080937_chr_6	ST11	KL64	O1/O2v1	Salmon_ST64B
NZ_CP095253.1	21080937	21080937_chr_7	ST11	KL64	O1/O2v1	Klebsi_ST437_OXA245phi4.1
NZ_CP095253.1	21080937	21080937_chr_8	ST11	KL64	O1/O2v1	Escher_phiV10
NZ_CP095253.1	21080937	21080937_chr_9	ST11	KL64	O1/O2v1	Escher_vB_EcoM_Schickermooser
NZ_CP095264.1	21091025	21091025_chr_1	ST11	KL64	O1/O2v1	Salmon_ST64B
NZ_CP095264.1	21091025	21091025_chr_2	ST11	KL64	O1/O2v1	Klebsi_ST437_OXA245phi4.1
NZ_CP095264.1	21091025	21091025_chr_3	ST11	KL64	O1/O2v1	Escher_phiV10
NZ_CP095264.1	21091025	21091025_chr_4	ST11	KL64	O1/O2v1	Escher_vB_EcoM_Schickermooser
NZ_CP095264.1	21091025	21091025_chr_5	ST11	KL64	O1/O2v1	Salmon_SEN34
NZ_CP095264.1	21091025	21091025_chr_6	ST11	KL64	O1/O2v1	Escher_HK639
NZ_CP095264.1	21091025	21091025_chr_8	ST11	KL64	O1/O2v1	Entero_c_1
NZ_CP095264.1	21091025	21091025_chr_9	ST11	KL64	O1/O2v1	Klebsi_ST512_KPC3phi13.2
NZ_CP095264.1	21091025	21091025_chr_10	ST11	KL64	O1/O2v1	Entero_P4
NZ_CP095264.1	21091025	21091025_chr_11	ST11	KL64	O1/O2v1	Entero_P4
NZ_CP103727.1	2289	2289_chr_1	ST17	KL58	O3b	Escher_500465_1
NZ_CP103727.1	2289	2289_chr_2	ST17	KL58	O3b	Entero_HK140
NZ_CP103727.1	2289	2289_chr_3	ST17	KL58	O3b	Erwini_vB_EhrS_59
NZ_CP011313.1	234-12	234-12_chr_1	ST514	KL35	O1/O2v1	Klebsi_ST147_VIM1phi7.1
NZ_CP011313.1	234-12	234-12_chr_2	ST514	KL35	O1/O2v1	Escher_500465_1
NZ_CP011313.1	234-12	234-12_chr_3	ST514	KL35	O1/O2v1	Erwini_vB_EhrS_59
NZ_CP011313.1	234-12	234-12_chr_5	ST514	KL35	O1/O2v1	Entero_mEp237
NZ_CP030320.1	23	23er_chr_1	ST412	KL57	O3b	Escher_500465_1
NZ_CP030320.1	23	23er_chr_2	ST412	KL57	O3b	Salmon_SPN1S
NZ_CP030320.1	23	23er_chr_3	ST412	KL57	O3b	Klebsi_ST16_OXA48phi5.4
NZ_CP030320.1	23	23er_chr_4	ST412	KL57	O3b	Klebsi_phiKO2
NZ_CP016926.1	23	23yi_chr_1	ST14	KL2	O1/O2v1	Salmon_Fels_1
NZ_CP016926.1	23	23yi_chr_2	ST14	KL2	O1/O2v1	Escher_500465_1
NZ_CP016926.1	23	23yi_chr_3	ST14	KL2	O1/O2v1	Entero_c_1
NZ_CP103550.1	2791	2791_chr_1	ST307	KL102	O1/O2v2	Pseudo_YMC11/02/R656
NZ_CP103550.1	2791	2791_chr_2	ST307	KL102	O1/O2v2	Klebsi_ST437_OXA245phi4.1
NZ_CP103550.1	2791	2791_chr_4	ST307	KL102	O1/O2v2	Escher_HK639
NZ_CP103550.1	2791	2791_chr_5	ST307	KL102	O1/O2v2	Salmon_118970_sal3
NZ_CP103550.1	2791	2791_chr_6	ST307	KL102	O1/O2v2	Salmon_SEN34
NZ_CP030300.1	283747	283747_chr_1	ST11	KL47	OL101	Salmon_ST64B
NZ_CP030300.1	283747	283747_chr_2	ST11	KL47	OL101	Klebsi_ST437_OXA245phi4.1
NZ_CP030300.1	283747	283747_chr_3	ST11	KL47	OL101	Escher_phiV10
NZ_CP030300.1	283747	283747_chr_4	ST11	KL47	OL101	Escher_vB_EcoM_Schickermooser
NZ_CP030300.1	283747	283747_chr_5	ST11	KL47	OL101	Pectob_ZF40
NZ_CP030300.1	283747	283747_chr_6	ST11	KL47	OL101	Salmon_SEN34
NZ_CP030300.1	283747	283747_chr_7	ST11	KL47	OL101	Bacill_SPbeta
NZ_CP030300.1	283747	283747_chr_8	ST11	KL47	OL101	Escher_HK639
NZ_CP030300.1	283747	283747_chr_9	ST11	KL47	OL101	Klebsi_phiKO2
NZ_CP030300.1	283747	283747_chr_10	ST11	KL47	OL101	Klebsi_ST512_KPC3phi13.2
NZ_CP030300.1	283747	283747_chr_11	ST11	KL47	OL101	Entero_P4
NZ_CP030300.1	283747	283747_chr_12	ST11	KL47	OL101	Entero_P4
NZ_CP103676.1	2946	2946_chr_1	ST307	KL102	O1/O2v2	Mycoba_Enkosi
NZ_CP103676.1	2946	2946_chr_3	ST307	KL102	O1/O2v2	Escher_500465_1
NZ_CP103676.1	2946	2946_chr_4	ST307	KL102	O1/O2v2	Salmon_118970_sal3
NZ_CP103676.1	2946	2946_chr_5	ST307	KL102	O1/O2v2	Klebsi_3LV2017
NZ_CP103676.1	2946	2946_chr_6	ST307	KL102	O1/O2v2	Klebsi_4LV2017
NZ_CP028478.1	2e	2e1_chr_1	ST3582	KL1	O1/O2v2	Escher_500465_1
NZ_CP028478.1	2e	2e1_chr_2	ST3582	KL1	O1/O2v2	Escher_phiV10
NZ_CP028478.1	2e	2e1_chr_3	ST3582	KL1	O1/O2v2	Entero_mEp235
NZ_CP028478.1	2e	2e1_chr_4	ST3582	KL1	O1/O2v2	Klebsi_ST16_OXA48phi5.4
NZ_CP028478.1	2e	2e1_chr_5	ST3582	KL1	O1/O2v2	Escher_SH2026Stx1
NZ_CP028478.1	2e	2e1_chr_6	ST3582	KL1	O1/O2v2	Aggreg_S1249
NZ_CP040175.1	2e	2e2_chr_1	ST4024	KL62	O1/O2v1	Escher_500465_1
NZ_CP040175.1	2e	2e2_chr_2	ST4024	KL62	O1/O2v1	Klebsi_phiKO2
NZ_CP040175.1	2e	2e2_chr_3	ST4024	KL62	O1/O2v1	Erwini_vB_EhrS_59
NZ_CP025541.3	2N3	2N3_chr_1	ST111	KL63	O1/O2v2	Erwini_vB_EhrS_59
NZ_CP025541.3	2N3	2N3_chr_2	ST111	KL63	O1/O2v2	Entero_mEp237
NZ_CP025541.3	2N3	2N3_chr_3	ST111	KL63	O1/O2v2	Escher_500465_1
NZ_CP025541.3	2N3	2N3_chr_4	ST111	KL63	O1/O2v2	Klebsi_ST15_OXA48phi14.1
NZ_CP027053.1	2_GR_12	2_GR_12_chr_1	ST258	KL106	O1/O2v2	Pseudo_OBP
NZ_CP027053.1	2_GR_12	2_GR_12_chr_2	ST258	KL106	O1/O2v2	Escher_RCS47
NZ_CP027053.1	2_GR_12	2_GR_12_chr_3	ST258	KL106	O1/O2v2	Entero_Tyrion
NZ_CP027053.1	2_GR_12	2_GR_12_chr_4	ST258	KL106	O1/O2v2	Escher_HK639
NZ_CP027053.1	2_GR_12	2_GR_12_chr_5	ST258	KL106	O1/O2v2	Klebsi_ST512_KPC3phi13.2
NZ_CP027053.1	2_GR_12	2_GR_12_chr_6	ST258	KL106	O1/O2v2	Erwini_vB_EhrS_59
NZ_CP027053.1	2_GR_12	2_GR_12_chr_7	ST258	KL106	O1/O2v2	Entero_P4
NZ_CP027053.1	2_GR_12	2_GR_12_chr_8	ST258	KL106	O1/O2v2	Entero_P4
NZ_CP027053.1	2_GR_12	2_GR_12_chr_9	ST258	KL106	O1/O2v2	Entero_SfI
NZ_CP006923.1	30660/NJST258_1	30660NJST258_1_chr_1	ST258	KL107	O1/O2v2	Entero_SfI
NZ_CP006923.1	30660/NJST258_1	30660NJST258_1_chr_2	ST258	KL107	O1/O2v2	Klebsi_ST437_OXA245phi4.1
NZ_CP006923.1	30660/NJST258_1	30660NJST258_1_chr_3	ST258	KL107	O1/O2v2	Escher_phiV10
NZ_CP006923.1	30660/NJST258_1	30660NJST258_1_chr_4	ST258	KL107	O1/O2v2	Escher_RCS47
NZ_CP006923.1	30660/NJST258_1	30660NJST258_1_chr_5	ST258	KL107	O1/O2v2	Salmon_SEN34
NZ_CP006923.1	30660/NJST258_1	30660NJST258_1_chr_6	ST258	KL107	O1/O2v2	Klebsi_ST512_KPC3phi13.2
NZ_CP006923.1	30660/NJST258_1	30660NJST258_1_chr_7	ST258	KL107	O1/O2v2	Erwini_vB_EhrS_59
NZ_CP006923.1	30660/NJST258_1	30660NJST258_1_chr_8	ST258	KL107	O1/O2v2	Entero_P4
NZ_CP006923.1	30660/NJST258_1	30660NJST258_1_chr_9	ST258	KL107	O1/O2v2	Entero_P4
NZ_CP006918.1	30684/NJST258_2	30684NJST258_2_chr_1	ST258	KL107	O1/O2v2	Entero_SfI
NZ_CP006918.1	30684/NJST258_2	30684NJST258_2_chr_2	ST258	KL107	O1/O2v2	Klebsi_ST437_OXA245phi4.1
NZ_CP006918.1	30684/NJST258_2	30684NJST258_2_chr_3	ST258	KL107	O1/O2v2	Escher_RCS47
NZ_CP006918.1	30684/NJST258_2	30684NJST258_2_chr_4	ST258	KL107	O1/O2v2	Salmon_SEN34
NZ_CP006918.1	30684/NJST258_2	30684NJST258_2_chr_5	ST258	KL107	O1/O2v2	Klebsi_ST512_KPC3phi13.2
NZ_CP006918.1	30684/NJST258_2	30684NJST258_2_chr_6	ST258	KL107	O1/O2v2	Escher_phiV10
NZ_CP006918.1	30684/NJST258_2	30684NJST258_2_chr_7	ST258	KL107	O1/O2v2	Entero_P4
NZ_CP006918.1	30684/NJST258_2	30684NJST258_2_chr_8	ST258	KL107	O1/O2v2	Entero_P4
NZ_CP006918.1	30684/NJST258_2	30684NJST258_2_chr_9	ST258	KL107	O1/O2v2	Bacill_vB_BtS_BMBtp14
NZ_CP030296.1	309074	309074_chr_1	ST1	KL24	O1/O2v1	Klebsi_ST437_OXA245phi4.1
NZ_CP030296.1	309074	309074_chr_2	ST1	KL24	O1/O2v1	Escher_phiV10
NZ_CP030296.1	309074	309074_chr_3	ST1	KL24	O1/O2v1	Edward_GF_2
NZ_CP030296.1	309074	309074_chr_4	ST1	KL24	O1/O2v1	Entero_P4
NZ_CP028850.1	3214	3214_chr_1	ST23	KL1	O1/O2v2	Strept_PapayaSalad
NZ_CP028850.1	3214	3214_chr_2	ST23	KL1	O1/O2v2	Escher_500465_1
NZ_CP028850.1	3214	3214_chr_3	ST23	KL1	O1/O2v2	Salmon_SPN1S
NZ_CP028850.1	3214	3214_chr_4	ST23	KL1	O1/O2v2	Mycoba_Heldan
NZ_CP028850.1	3214	3214_chr_5	ST23	KL1	O1/O2v2	Serrat_vB_SmaA_3M
NZ_CP028850.1	3214	3214_chr_6	ST23	KL1	O1/O2v2	Entero_mEp237
NZ_CP028850.1	3214	3214_chr_7	ST23	KL1	O1/O2v2	Klebsi_phiKO2
NZ_CP010361.1	32192	32192_chr_1	ST258	KL106	O1/O2v2	Salmon_ST64B
NZ_CP010361.1	32192	32192_chr_2	ST258	KL106	O1/O2v2	Escher_500465_1
NZ_CP010361.1	32192	32192_chr_3	ST258	KL106	O1/O2v2	Microc_Ma_LMM01
NZ_CP010361.1	32192	32192_chr_4	ST258	KL106	O1/O2v2	Salmon_SEN34
NZ_CP010361.1	32192	32192_chr_5	ST258	KL106	O1/O2v2	Pectob_ZF40
NZ_CP010361.1	32192	32192_chr_6	ST258	KL106	O1/O2v2	Klebsi_ST512_KPC3phi13.2
NZ_CP010361.1	32192	32192_chr_7	ST258	KL106	O1/O2v2	Erwini_vB_EhrS_59
NZ_CP010361.1	32192	32192_chr_8	ST258	KL106	O1/O2v2	Entero_P4
NZ_CP010361.1	32192	32192_chr_9	ST258	KL106	O1/O2v2	Entero_P4
NZ_CP010361.1	32192	32192_chr_10	ST258	KL106	O1/O2v2	Bacill_vB_BtS_BMBtp14
NZ_CP103635.1	3221	3221_chr_1	ST307	KL102	O1/O2v2	Klebsi_ST147_VIM1phi7.1
NZ_CP103635.1	3221	3221_chr_3	ST307	KL102	O1/O2v2	Escher_500465_1
NZ_CP103635.1	3221	3221_chr_4	ST307	KL102	O1/O2v2	Salmon_118970_sal3
NZ_CP103635.1	3221	3221_chr_5	ST307	KL102	O1/O2v2	Klebsi_3LV2017
NZ_CP103635.1	3221	3221_chr_6	ST307	KL102	O1/O2v2	Erwini_vB_EhrS_59
NZ_CP099403.1	33221	33221_chr_1	ST252	KL81	O1/O2v2	Salmon_Fels_1
NZ_CP099403.1	33221	33221_chr_2	ST252	KL81	O1/O2v2	Entero_HK140
NZ_CP099403.1	33221	33221_chr_3	ST252	KL81	O1/O2v2	Salmon_118970_sal3
NZ_CP099403.1	33221	33221_chr_4	ST252	KL81	O1/O2v2	Stx2_c_1717
NZ_CP099403.1	33221	33221_chr_5	ST252	KL81	O1/O2v2	Edward_GF_2
NZ_CP099413.1	33367	33367_chr_1	ST11	KL64	O1/O2v1	Salmon_ST64B
NZ_CP099413.1	33367	33367_chr_2	ST11	KL64	O1/O2v1	Klebsi_ST437_OXA245phi4.1
NZ_CP099413.1	33367	33367_chr_3	ST11	KL64	O1/O2v1	Escher_phiV10
NZ_CP099413.1	33367	33367_chr_4	ST11	KL64	O1/O2v1	Escher_vB_EcoM_Schickermooser
NZ_CP099413.1	33367	33367_chr_5	ST11	KL64	O1/O2v1	Salmon_SEN34
NZ_CP099413.1	33367	33367_chr_6	ST11	KL64	O1/O2v1	Escher_RCS47
NZ_CP099413.1	33367	33367_chr_7	ST11	KL64	O1/O2v1	Escher_HK639
NZ_CP099413.1	33367	33367_chr_9	ST11	KL64	O1/O2v1	Entero_c_1
NZ_CP099413.1	33367	33367_chr_10	ST11	KL64	O1/O2v1	Klebsi_ST512_KPC3phi13.2
NZ_CP099413.1	33367	33367_chr_11	ST11	KL64	O1/O2v1	Entero_P4
NZ_CP099413.1	33367	33367_chr_12	ST11	KL64	O1/O2v1	Entero_P4
NZ_CP071080.1	3347684I	3347684I_chr_1	ST268	KL20	O1/O2v1	Escher_500465_1
NZ_CP071080.1	3347684I	3347684I_chr_2	ST268	KL20	O1/O2v1	Klebsi_phiKO2
NZ_CP071080.1	3347684I	3347684I_chr_4	ST268	KL20	O1/O2v1	Escher_HK639
NZ_CP071086.1	3347689I	3347689I_chr_1	ST395	KL108	O1/O2v2	Klebsi_ST437_OXA245phi4.1
NZ_CP071086.1	3347689I	3347689I_chr_3	ST395	KL108	O1/O2v2	Salmon_118970_sal3
NZ_CP071086.1	3347689I	3347689I_chr_4	ST395	KL108	O1/O2v2	Salmon_SEN34
NZ_CP071086.1	3347689I	3347689I_chr_5	ST395	KL108	O1/O2v2	Escher_HK639
NZ_CP071086.1	3347689I	3347689I_chr_6	ST395	KL108	O1/O2v2	Klebsi_ST512_KPC3phi13.2
NZ_CP071086.1	3347689I	3347689I_chr_7	ST395	KL108	O1/O2v2	Edward_GF_2
NZ_CP071086.1	3347689I	3347689I_chr_8	ST395	KL108	O1/O2v2	Entero_P4
NZ_CP071086.1	3347689I	3347689I_chr_9	ST395	KL108	O1/O2v2	Entero_P4
NZ_CP071086.1	3347689I	3347689I_chr_10	ST395	KL108	O1/O2v2	Klebsi_3LV2017
NZ_CP099409.1	33612	33612_chr_1	ST252	KL81	O1/O2v2	Salmon_Fels_1
NZ_CP099409.1	33612	33612_chr_2	ST252	KL81	O1/O2v2	Escher_RCS47
NZ_CP099409.1	33612	33612_chr_3	ST252	KL81	O1/O2v2	Acinet_vB_AbaM_ME3
NZ_CP099409.1	33612	33612_chr_4	ST252	KL81	O1/O2v2	Escher_RCS47
NZ_CP099409.1	33612	33612_chr_5	ST252	KL81	O1/O2v2	Escher_500465_1
NZ_CP099409.1	33612	33612_chr_6	ST252	KL81	O1/O2v2	Entero_HK140
NZ_CP099409.1	33612	33612_chr_7	ST252	KL81	O1/O2v2	Salmon_118970_sal3
NZ_CP099409.1	33612	33612_chr_8	ST252	KL81	O1/O2v2	Stx2_c_1717
NZ_CP099409.1	33612	33612_chr_9	ST252	KL81	O1/O2v2	Edward_GF_2
NZ_CP062792.1	33Kpn12	33Kpn12_chr_1	ST504	KL13	O1/O2v1	Klebsi_ST15_OXA48phi14.1
NZ_CP062792.1	33Kpn12	33Kpn12_chr_2	ST504	KL13	O1/O2v1	Cyanop_KBS_S_2A
NZ_CP062792.1	33Kpn12	33Kpn12_chr_3	ST504	KL13	O1/O2v1	Escher_500465_1
NZ_CP062792.1	33Kpn12	33Kpn12_chr_4	ST504	KL13	O1/O2v1	Salmon_118970_sal3
NZ_CP062792.1	33Kpn12	33Kpn12_chr_5	ST504	KL13	O1/O2v1	Salmon_SEN34
NZ_CP062792.1	33Kpn12	33Kpn12_chr_6	ST504	KL13	O1/O2v1	Entero_c_1
NZ_CP062792.1	33Kpn12	33Kpn12_chr_7	ST504	KL13	O1/O2v1	Pseudo_phi297
NZ_CP062792.1	33Kpn12	33Kpn12_chr_8	ST504	KL13	O1/O2v1	Cronob_ENT47670
NZ_CP062792.1	33Kpn12	33Kpn12_chr_9	ST504	KL13	O1/O2v1	Entero_P4
NZ_CP069046.1	33Kpn22	33Kpn22_chr_1	ST258	KL107	OL102	Entero_SfI
NZ_CP069046.1	33Kpn22	33Kpn22_chr_2	ST258	KL107	OL102	Klebsi_ST437_OXA245phi4.1
NZ_CP069046.1	33Kpn22	33Kpn22_chr_3	ST258	KL107	OL102	Escher_phiV10
NZ_CP069046.1	33Kpn22	33Kpn22_chr_4	ST258	KL107	OL102	Pseudo_OBP
NZ_CP069046.1	33Kpn22	33Kpn22_chr_5	ST258	KL107	OL102	Pectob_ZF40
NZ_CP069046.1	33Kpn22	33Kpn22_chr_6	ST258	KL107	OL102	Escher_RCS47
NZ_CP069046.1	33Kpn22	33Kpn22_chr_7	ST258	KL107	OL102	Salmon_SEN34
NZ_CP069046.1	33Kpn22	33Kpn22_chr_8	ST258	KL107	OL102	Klebsi_ST512_KPC3phi13.2
NZ_CP069046.1	33Kpn22	33Kpn22_chr_9	ST258	KL107	OL102	Entero_P4
NZ_CP069046.1	33Kpn22	33Kpn22_chr_10	ST258	KL107	OL102	Entero_P4
NZ_CP034321.1	33	33_chr_1	ST76	KL10	O3/O3a	Escher_500465_1
NZ_CP034321.1	33	33_chr_2	ST76	KL10	O3/O3a	Entero_mEp237
NZ_CP034321.1	33	33_chr_3	ST76	KL10	O3/O3a	Klebsi_phiKO2
NZ_CP034321.1	33	33_chr_4	ST76	KL10	O3/O3a	Klebsi_4LV2017
NZ_CP034321.1	33	33_chr_5	ST76	KL10	O3/O3a	Entero_cdtI
NZ_CP010392.1	34618	34618_chr_1	ST258	KL63	O1/O2v2	Entero_SfI
NZ_CP010392.1	34618	34618_chr_2	ST258	KL63	O1/O2v2	Escher_500465_1
NZ_CP010392.1	34618	34618_chr_3	ST258	KL63	O1/O2v2	Microc_Ma_LMM01
NZ_CP010392.1	34618	34618_chr_4	ST258	KL63	O1/O2v2	Salmon_SEN34
NZ_CP010392.1	34618	34618_chr_5	ST258	KL63	O1/O2v2	Entero_P1
NZ_CP010392.1	34618	34618_chr_6	ST258	KL63	O1/O2v2	Escher_HK639
NZ_CP010392.1	34618	34618_chr_7	ST258	KL63	O1/O2v2	Erwini_vB_EhrS_59
NZ_CP010392.1	34618	34618_chr_8	ST258	KL63	O1/O2v2	Entero_P4
NZ_CP010392.1	34618	34618_chr_9	ST258	KL63	O1/O2v2	Entero_P4
NZ_CP010392.1	34618	34618_chr_10	ST258	KL63	O1/O2v2	Bacill_vB_BtS_BMBtp14
NZ_CP103614.1	3571	3571_chr_1	ST3293	KL60	O3b	Salmon_118970_sal3
NZ_CP103614.1	3571	3571_chr_2	ST3293	KL60	O3b	Escher_HK639
NZ_CP103614.1	3571	3571_chr_4	ST3293	KL60	O3b	Klebsi_ST16_OXA48phi5.4
NZ_CP103614.1	3571	3571_chr_5	ST3293	KL60	O3b	Klebsi_phiKO2
NZ_CP103614.1	3571	3571_chr_6	ST3293	KL60	O3b	Entero_P4
NZ_CP082759.1	36	36_chr_1	ST11	KL64	O1/O2v1	Salmon_ST64B
NZ_CP082759.1	36	36_chr_2	ST11	KL64	O1/O2v1	Klebsi_ST437_OXA245phi4.1
NZ_CP082759.1	36	36_chr_3	ST11	KL64	O1/O2v1	Escher_phiV10
NZ_CP082759.1	36	36_chr_4	ST11	KL64	O1/O2v1	Entero_phi92
NZ_CP082759.1	36	36_chr_5	ST11	KL64	O1/O2v1	Salmon_SEN34
NZ_CP082759.1	36	36_chr_6	ST11	KL64	O1/O2v1	Entero_P1
NZ_CP082759.1	36	36_chr_7	ST11	KL64	O1/O2v1	Escher_HK639
NZ_CP082759.1	36	36_chr_8	ST11	KL64	O1/O2v1	Klebsi_phiKO2
NZ_CP082759.1	36	36_chr_9	ST11	KL64	O1/O2v1	Entero_mEp237
NZ_CP082759.1	36	36_chr_10	ST11	KL64	O1/O2v1	Entero_c_1
NZ_CP082759.1	36	36_chr_11	ST11	KL64	O1/O2v1	Klebsi_ST512_KPC3phi13.2
NZ_CP082759.1	36	36_chr_12	ST11	KL64	O1/O2v1	Entero_P4
NZ_CP082759.1	36	36_chr_13	ST11	KL64	O1/O2v1	Entero_P4
NZ_CP082753.1	37	37_chr_1	ST11	KL64	O1/O2v1	Salmon_ST64B
NZ_CP082753.1	37	37_chr_2	ST11	KL64	O1/O2v1	Klebsi_ST437_OXA245phi4.1
NZ_CP082753.1	37	37_chr_3	ST11	KL64	O1/O2v1	Escher_phiV10
NZ_CP082753.1	37	37_chr_4	ST11	KL64	O1/O2v1	Entero_phi92
NZ_CP082753.1	37	37_chr_5	ST11	KL64	O1/O2v1	Salmon_SEN34
NZ_CP082753.1	37	37_chr_6	ST11	KL64	O1/O2v1	Escher_RCS47
NZ_CP082753.1	37	37_chr_7	ST11	KL64	O1/O2v1	Escher_HK639
NZ_CP082753.1	37	37_chr_9	ST11	KL64	O1/O2v1	Entero_c_1
NZ_CP082753.1	37	37_chr_10	ST11	KL64	O1/O2v1	Klebsi_ST512_KPC3phi13.2
NZ_CP082753.1	37	37_chr_11	ST11	KL64	O1/O2v1	Entero_P4
NZ_CP082753.1	37	37_chr_12	ST11	KL64	O1/O2v1	Entero_P4
NZ_CP054268.1	39427	39427_chr_1	ST258	KL107	O1/O2v2	Shigel_SfIV
NZ_CP054268.1	39427	39427_chr_2	ST258	KL107	O1/O2v2	Klebsi_ST437_OXA245phi4.1
NZ_CP054268.1	39427	39427_chr_3	ST258	KL107	O1/O2v2	Escher_phiV10
NZ_CP054268.1	39427	39427_chr_4	ST258	KL107	O1/O2v2	Microc_MaMV_DC
NZ_CP054268.1	39427	39427_chr_5	ST258	KL107	O1/O2v2	Salmon_SEN34
NZ_CP054268.1	39427	39427_chr_6	ST258	KL107	O1/O2v2	Cronob_ENT39118
NZ_CP054268.1	39427	39427_chr_7	ST258	KL107	O1/O2v2	Escher_HK639
NZ_CP054268.1	39427	39427_chr_8	ST258	KL107	O1/O2v2	Klebsi_ST512_KPC3phi13.2
NZ_CP054268.1	39427	39427_chr_9	ST258	KL107	O1/O2v2	Erwini_vB_EhrS_59
NZ_CP054268.1	39427	39427_chr_10	ST258	KL107	O1/O2v2	Entero_P4
NZ_CP054268.1	39427	39427_chr_11	ST258	KL107	O1/O2v2	Entero_P4
NZ_CP054268.1	39427	39427_chr_12	ST258	KL107	O1/O2v2	Bacill_vB_BtS_BMBtp14
NZ_CP056029.1	39428	39428_chr_1	ST258	KL106	O1/O2v2	Salmon_ST64B
NZ_CP056029.1	39428	39428_chr_2	ST258	KL106	O1/O2v2	Escher_500465_1
NZ_CP056029.1	39428	39428_chr_3	ST258	KL106	O1/O2v2	Microc_Ma_LMM01
NZ_CP056029.1	39428	39428_chr_4	ST258	KL106	O1/O2v2	Salmon_SEN34
NZ_CP056029.1	39428	39428_chr_5	ST258	KL106	O1/O2v2	Pectob_ZF40
NZ_CP056029.1	39428	39428_chr_6	ST258	KL106	O1/O2v2	Klebsi_ST512_KPC3phi13.2
NZ_CP056029.1	39428	39428_chr_7	ST258	KL106	O1/O2v2	Erwini_vB_EhrS_59
NZ_CP056029.1	39428	39428_chr_8	ST258	KL106	O1/O2v2	Entero_P4
NZ_CP056029.1	39428	39428_chr_9	ST258	KL106	O1/O2v2	Entero_P4
NZ_CP056029.1	39428	39428_chr_10	ST258	KL106	O1/O2v2	Escher_503458
NZ_CP103548.1	3987	3987_chr_1	ST307	KL102	O1/O2v2	Salmon_SJ46
NZ_CP103548.1	3987	3987_chr_2	ST307	KL102	O1/O2v2	Klebsi_3LV2017
NZ_CP103548.1	3987	3987_chr_3	ST307	KL102	O1/O2v2	Salmon_118970_sal3
NZ_CP103548.1	3987	3987_chr_4	ST307	KL102	O1/O2v2	Escher_500465_1
NZ_CP103548.1	3987	3987_chr_6	ST307	KL102	O1/O2v2	Clostr_phiCPV4
NZ_CP103548.1	3987	3987_chr_7	ST307	KL102	O1/O2v2	Erwini_vB_EhrS_59
NZ_CP103548.1	3987	3987_chr_8	ST307	KL102	O1/O2v2	Salmon_SJ46
NZ_CP103548.1	3987	3987_chr_9	ST307	KL102	O1/O2v2	Entero_P1
NZ_CP083047.1	400195-1-18	400195-1-18_chr_1	ST14	KL2	O1/O2v1	Salmon_ST64B
NZ_CP083047.1	400195-1-18	400195-1-18_chr_2	ST14	KL2	O1/O2v1	Escher_HK639
NZ_CP083047.1	400195-1-18	400195-1-18_chr_3	ST14	KL2	O1/O2v1	Entero_phiP27
NZ_CP083047.1	400195-1-18	400195-1-18_chr_4	ST14	KL2	O1/O2v1	Erwini_vB_EhrS_59
NZ_CP083047.1	400195-1-18	400195-1-18_chr_5	ST14	KL2	O1/O2v1	Entero_HK106
NZ_CP083047.1	400195-1-18	400195-1-18_chr_6	ST14	KL2	O1/O2v1	Klebsi_ST16_OXA48phi5.4
NZ_CP083043.1	400195-2-18	400195-2-18_chr_1	ST14	KL2	O1/O2v1	Salmon_118970_sal3
NZ_CP083043.1	400195-2-18	400195-2-18_chr_2	ST14	KL2	O1/O2v1	Escher_HK639
NZ_CP083043.1	400195-2-18	400195-2-18_chr_3	ST14	KL2	O1/O2v1	Entero_phiP27
NZ_CP083043.1	400195-2-18	400195-2-18_chr_4	ST14	KL2	O1/O2v1	Erwini_vB_EhrS_59
NZ_CP083043.1	400195-2-18	400195-2-18_chr_5	ST14	KL2	O1/O2v1	Entero_HK106
NZ_CP083043.1	400195-2-18	400195-2-18_chr_6	ST14	KL2	O1/O2v1	Klebsi_ST16_OXA48phi5.4
NZ_CP103579.1	4014	4014_chr_1	ST2004	KL23	O1/O2v2	Klebsi_ST147_VIM1phi7.1
NZ_CP103579.1	4014	4014_chr_2	ST2004	KL23	O1/O2v2	Escher_500465_1
NZ_CP103579.1	4014	4014_chr_3	ST2004	KL23	O1/O2v2	Entero_mEp237
NZ_CP103579.1	4014	4014_chr_4	ST2004	KL23	O1/O2v2	Klebsi_phiKO2
NZ_CP103579.1	4014	4014_chr_5	ST2004	KL23	O1/O2v2	Klebsi_4LV2017
NZ_CP103579.1	4014	4014_chr_7	ST2004	KL23	O1/O2v2	Salmon_SJ46
NZ_CP103579.1	4014	4014_chr_8	ST2004	KL23	O1/O2v2	Escher_503458
NZ_CP023839.1	4/1-2	41-2_chr_1	ST147	KL64	O1/O2v1	Klebsi_ST147_VIM1phi7.1
NZ_CP023839.1	4/1-2	41-2_chr_2	ST147	KL64	O1/O2v1	Salmon_118970_sal3
NZ_CP023839.1	4/1-2	41-2_chr_3	ST147	KL64	O1/O2v1	Synech_S_TIP37
NZ_CP023839.1	4/1-2	41-2_chr_4	ST147	KL64	O1/O2v1	Entero_mEp237
NZ_CP023839.1	4/1-2	41-2_chr_5	ST147	KL64	O1/O2v1	Escher_503458
NZ_CP068618.1	41968	41968_chr_1	ST258	KL23	O1/O2v2	Salmon_ST64B
NZ_CP068618.1	41968	41968_chr_2	ST258	KL23	O1/O2v2	Escher_500465_1
NZ_CP068618.1	41968	41968_chr_3	ST258	KL23	O1/O2v2	Microc_MaMV_DC
NZ_CP068618.1	41968	41968_chr_4	ST258	KL23	O1/O2v2	Salmon_SEN34
NZ_CP068618.1	41968	41968_chr_6	ST258	KL23	O1/O2v2	Escher_HK639
NZ_CP068618.1	41968	41968_chr_7	ST258	KL23	O1/O2v2	Pectob_ZF40
NZ_CP068618.1	41968	41968_chr_8	ST258	KL23	O1/O2v2	Klebsi_ST512_KPC3phi13.2
NZ_CP068618.1	41968	41968_chr_9	ST258	KL23	O1/O2v2	Entero_P4
NZ_CP068618.1	41968	41968_chr_10	ST258	KL23	O1/O2v2	Entero_P4
NZ_CP068618.1	41968	41968_chr_11	ST258	KL23	O1/O2v2	Escher_503458
NZ_CP068614.1	42362	42362_chr_1	ST258	KL106	O1/O2v2	Shigel_SfIV
NZ_CP068614.1	42362	42362_chr_2	ST258	KL106	O1/O2v2	Escher_RCS47
NZ_CP068614.1	42362	42362_chr_3	ST258	KL106	O1/O2v2	Escher_500465_1
NZ_CP068614.1	42362	42362_chr_4	ST258	KL106	O1/O2v2	Escher_phiV10
NZ_CP068614.1	42362	42362_chr_5	ST258	KL106	O1/O2v2	Microc_Ma_LMM01
NZ_CP068614.1	42362	42362_chr_6	ST258	KL106	O1/O2v2	Escher_RCS47
NZ_CP068614.1	42362	42362_chr_7	ST258	KL106	O1/O2v2	Salmon_SEN34
NZ_CP068614.1	42362	42362_chr_8	ST258	KL106	O1/O2v2	Salmon_vB_SosS_Oslo
NZ_CP068614.1	42362	42362_chr_9	ST258	KL106	O1/O2v2	Escher_HK639
NZ_CP068614.1	42362	42362_chr_10	ST258	KL106	O1/O2v2	Pectob_ZF40
NZ_CP068614.1	42362	42362_chr_11	ST258	KL106	O1/O2v2	Klebsi_ST512_KPC3phi13.2
NZ_CP068614.1	42362	42362_chr_12	ST258	KL106	O1/O2v2	Erwini_vB_EhrS_59
NZ_CP068614.1	42362	42362_chr_13	ST258	KL106	O1/O2v2	Entero_P4
NZ_CP068614.1	42362	42362_chr_14	ST258	KL106	O1/O2v2	Entero_P4
NZ_CP103621.1	433	433_chr_1	ST870	KL17	O1/O2v1	Escher_500465_1
NZ_CP103621.1	433	433_chr_2	ST870	KL17	O1/O2v1	Salmon_SJ46
NZ_CP103621.1	433	433_chr_3	ST870	KL17	O1/O2v1	Klebsi_ST15_OXA48phi14.1
NZ_CP103621.1	433	433_chr_4	ST870	KL17	O1/O2v1	Klebsi_4LV2017
NZ_CP103618.1	4383	4383_chr_1	ST15	KL24	O1/O2v1	Escher_500465_1
NZ_CP103618.1	4383	4383_chr_2	ST15	KL24	O1/O2v1	Entero_N15
NZ_CP103618.1	4383	4383_chr_3	ST15	KL24	O1/O2v1	Salmon_118970_sal3
NZ_CP103618.1	4383	4383_chr_4	ST15	KL24	O1/O2v1	Klebsi_ST16_OXA48phi5.4
NZ_CP103605.1	4386	4386_chr_1	ST29	KL19	O1/O2v2	Escher_500465_1
NZ_CP103605.1	4386	4386_chr_2	ST29	KL19	O1/O2v2	Klebsi_phiKO2
NZ_CP068610.1	45706	45706_chr_1	ST258	KL63	O1/O2v2	Shigel_SfII
NZ_CP068610.1	45706	45706_chr_2	ST258	KL63	O1/O2v2	Escher_500465_1
NZ_CP068610.1	45706	45706_chr_3	ST258	KL63	O1/O2v2	Escher_phiV10
NZ_CP068610.1	45706	45706_chr_4	ST258	KL63	O1/O2v2	Microc_Ma_LMM01
NZ_CP068610.1	45706	45706_chr_5	ST258	KL63	O1/O2v2	Salmon_SEN34
NZ_CP068610.1	45706	45706_chr_6	ST258	KL63	O1/O2v2	Salmon_vB_SosS_Oslo
NZ_CP068610.1	45706	45706_chr_7	ST258	KL63	O1/O2v2	Escher_HK639
NZ_CP068610.1	45706	45706_chr_8	ST258	KL63	O1/O2v2	Erwini_vB_EhrS_59
NZ_CP068610.1	45706	45706_chr_9	ST258	KL63	O1/O2v2	Entero_P4
NZ_CP068610.1	45706	45706_chr_10	ST258	KL63	O1/O2v2	Entero_P4
NZ_CP068610.1	45706	45706_chr_11	ST258	KL63	O1/O2v2	Escher_503458
NZ_CP018306.1	459	459_chr_1	ST37	KL11	O3b	Entero_phi92
NZ_CP018306.1	459	459_chr_2	ST37	KL11	O3b	Salmon_SEN34
NZ_CP018306.1	459	459_chr_3	ST37	KL11	O3b	Escher_500465_1
NZ_CP018306.1	459	459_chr_4	ST37	KL11	O3b	Entero_mEp235
NZ_CP018306.1	459	459_chr_5	ST37	KL11	O3b	Klebsi_ST16_OXA48phi5.4
NZ_CP018306.1	459	459_chr_6	ST37	KL11	O3b	Entero_mEp237
NZ_CP018306.1	459	459_chr_7	ST37	KL11	O3b	Synech_Bellamy
NZ_CP042318.1	46-16	46-16_chr_1	ST512	KL107	O1/O2v2	Salmon_118970_sal3
NZ_CP042318.1	46-16	46-16_chr_2	ST512	KL107	O1/O2v2	Entero_P4
NZ_CP042318.1	46-16	46-16_chr_3	ST512	KL107	O1/O2v2	Entero_P4
NZ_CP042318.1	46-16	46-16_chr_4	ST512	KL107	O1/O2v2	Erwini_vB_EhrS_59
NZ_CP042318.1	46-16	46-16_chr_5	ST512	KL107	O1/O2v2	Klebsi_ST512_KPC3phi13.2
NZ_CP042318.1	46-16	46-16_chr_6	ST512	KL107	O1/O2v2	Salmon_SEN34
NZ_CP042318.1	46-16	46-16_chr_7	ST512	KL107	O1/O2v2	Microc_MaMV_DC
NZ_CP042318.1	46-16	46-16_chr_8	ST512	KL107	O1/O2v2	Escher_500465_1
NZ_CP103567.1	4680	4680_chr_1	ST29	KL19	O1/O2v2	Staphy_SPbeta_like
NZ_CP103567.1	4680	4680_chr_2	ST29	KL19	O1/O2v2	Escher_RCS47
NZ_CP103567.1	4680	4680_chr_3	ST29	KL19	O1/O2v2	Salmon_SJ46
NZ_CP103567.1	4680	4680_chr_4	ST29	KL19	O1/O2v2	Escher_500465_1
NZ_CP103567.1	4680	4680_chr_5	ST29	KL19	O1/O2v2	Klebsi_phiKO2
NZ_CP088120.1	46	46_chr_1	ST11	KL167	O4	Salmon_ST64B
NZ_CP088120.1	46	46_chr_2	ST11	KL167	O4	Escher_500465_1
NZ_CP088120.1	46	46_chr_3	ST11	KL167	O4	Escher_RCS47
NZ_CP088120.1	46	46_chr_4	ST11	KL167	O4	Bacter_APSE_2
NZ_CP088120.1	46	46_chr_5	ST11	KL167	O4	Cronob_ESSI_2
NZ_CP088120.1	46	46_chr_6	ST11	KL167	O4	Klebsi_4LV2017
NZ_CP088120.1	46	46_chr_7	ST11	KL167	O4	Entero_P4
NZ_CP088120.1	46	46_chr_8	ST11	KL167	O4	Entero_P4
NZ_CP088120.1	46	46_chr_9	ST11	KL167	O4	Escher_503458
NZ_CP103586.1	4737	4737_chr_1	ST307	KL102	O1/O2v2	Synech_S_CBS1
NZ_CP103586.1	4737	4737_chr_3	ST307	KL102	O1/O2v2	Escher_500465_1
NZ_CP103586.1	4737	4737_chr_4	ST307	KL102	O1/O2v2	Salmon_SEN34
NZ_CP103586.1	4737	4737_chr_5	ST307	KL102	O1/O2v2	Klebsi_3LV2017
NZ_CP103586.1	4737	4737_chr_6	ST307	KL102	O1/O2v2	Klebsi_4LV2017
NZ_CP103586.1	4737	4737_chr_7	ST307	KL102	O1/O2v2	Erwini_vB_EhrS_59
NZ_CP033625.1	4743	4743_chr_1	ST1685	KL17	O1/O2v1	Klebsi_4LV2017
NZ_CP033625.1	4743	4743_chr_2	ST1685	KL17	O1/O2v1	Escher_500465_1
NZ_CP033625.1	4743	4743_chr_3	ST1685	KL17	O1/O2v1	Salmon_vB_SosS_Oslo
NZ_CP033625.1	4743	4743_chr_4	ST1685	KL17	O1/O2v1	Escher_phiV10
NZ_CP033625.1	4743	4743_chr_5	ST1685	KL17	O1/O2v1	Salmon_118970_sal3
NZ_CP033625.1	4743	4743_chr_6	ST1685	KL17	O1/O2v1	Klebsi_3LV2017
NZ_CP033625.1	4743	4743_chr_7	ST1685	KL17	O1/O2v1	Erwini_vB_EhrS_59
NZ_CP033625.1	4743	4743_chr_8	ST1685	KL17	O1/O2v1	Entero_P4
NZ_CP050360.1	47733	47733_chr_1	ST147	KL64	O1/O2v1	Entero_mEp237
NZ_CP050360.1	47733	47733_chr_2	ST147	KL64	O1/O2v1	Salmon_118970_sal3
NZ_CP050360.1	47733	47733_chr_3	ST147	KL64	O1/O2v1	Entero_c_1
NZ_CP050360.1	47733	47733_chr_4	ST147	KL64	O1/O2v1	Escher_500465_1
NZ_CP050360.1	47733	47733_chr_5	ST147	KL64	O1/O2v1	Klebsi_ST147_VIM1phi7.1
NZ_CP050360.1	47733	47733_chr_6	ST147	KL64	O1/O2v1	Escher_503458
NZ_CP083036.1	4906.28	4906.28_chr_1	ST101	KL17	O1/O2v1	Escher_500465_1
NZ_CP083036.1	4906.28	4906.28_chr_2	ST101	KL17	O1/O2v1	Entero_phiP27
NZ_CP083036.1	4906.28	4906.28_chr_3	ST101	KL17	O1/O2v1	Escher_phiV10
NZ_CP083036.1	4906.28	4906.28_chr_4	ST101	KL17	O1/O2v1	Salmon_118970_sal3
NZ_CP083036.1	4906.28	4906.28_chr_5	ST101	KL17	O1/O2v1	Klebsi_3LV2017
NZ_CP083036.1	4906.28	4906.28_chr_6	ST101	KL17	O1/O2v1	Salmon_SEN34
NZ_CP083036.1	4906.28	4906.28_chr_7	ST101	KL17	O1/O2v1	Klebsi_ST437_OXA245phi4.1
NZ_CP083036.1	4906.28	4906.28_chr_8	ST101	KL17	O1/O2v1	Klebsi_phiKO2
NZ_CP083036.1	4906.28	4906.28_chr_9	ST101	KL17	O1/O2v1	Erwini_vB_EhrS_59
NZ_CP088997.1	49088	49088_chr_1	ST11	KL47	OL101	Entero_SfI
NZ_CP088997.1	49088	49088_chr_2	ST11	KL47	OL101	Klebsi_ST437_OXA245phi4.1
NZ_CP088997.1	49088	49088_chr_3	ST11	KL47	OL101	Escher_phiV10
NZ_CP088997.1	49088	49088_chr_4	ST11	KL47	OL101	Escher_ESCO5
NZ_CP088997.1	49088	49088_chr_5	ST11	KL47	OL101	Salmon_118970_sal3
NZ_CP088997.1	49088	49088_chr_6	ST11	KL47	OL101	Salmon_SPN3UB
NZ_CP088997.1	49088	49088_chr_7	ST11	KL47	OL101	Escher_HK639
NZ_CP088997.1	49088	49088_chr_8	ST11	KL47	OL101	Salmon_SEN34
NZ_CP088997.1	49088	49088_chr_9	ST11	KL47	OL101	Salmon_118970_sal3
NZ_CP088997.1	49088	49088_chr_10	ST11	KL47	OL101	Klebsi_ST512_KPC3phi13.2
NZ_CP088997.1	49088	49088_chr_11	ST11	KL47	OL101	Entero_P4
NZ_CP088997.1	49088	49088_chr_12	ST11	KL47	OL101	Entero_P4
NZ_CP089024.1	49210	49210_chr_1	ST23	KL1	O1/O2v2	Escher_500465_1
NZ_CP089024.1	49210	49210_chr_2	ST23	KL1	O1/O2v2	Erwini_vB_EhrS_59
NZ_CP089024.1	49210	49210_chr_3	ST23	KL1	O1/O2v2	Salmon_SPN1S
NZ_CP089024.1	49210	49210_chr_4	ST23	KL1	O1/O2v2	Mycoba_Heldan
NZ_CP089024.1	49210	49210_chr_5	ST23	KL1	O1/O2v2	Edward_GF_2
NZ_CP089024.1	49210	49210_chr_6	ST23	KL1	O1/O2v2	Salmon_Fels_1
NZ_CP089024.1	49210	49210_chr_7	ST23	KL1	O1/O2v2	Ralsto_RSY1
NZ_CP089024.1	49210	49210_chr_8	ST23	KL1	O1/O2v2	Klebsi_phiKO2
NZ_CP097232.1	4	4_chr_1	ST14	KL2	O1/O2v1	Erwini_vB_EhrS_59
NZ_CP097232.1	4	4_chr_2	ST14	KL2	O1/O2v1	Escher_500465_1
NZ_CP097232.1	4	4_chr_4	ST14	KL2	O1/O2v1	Escher_HK639
NZ_CP097232.1	4	4_chr_5	ST14	KL2	O1/O2v1	Entero_phiP27
NZ_CP042320.1	5-16	5-16_chr_1	ST512	KL107	O1/O2v2	Shigel_SfIV
NZ_CP042320.1	5-16	5-16_chr_2	ST512	KL107	O1/O2v2	Entero_P4
NZ_CP042320.1	5-16	5-16_chr_3	ST512	KL107	O1/O2v2	Entero_P4
NZ_CP042320.1	5-16	5-16_chr_4	ST512	KL107	O1/O2v2	Erwini_vB_EhrS_59
NZ_CP042320.1	5-16	5-16_chr_5	ST512	KL107	O1/O2v2	Klebsi_ST512_KPC3phi13.2
NZ_CP042320.1	5-16	5-16_chr_6	ST512	KL107	O1/O2v2	Salmon_SEN34
NZ_CP042320.1	5-16	5-16_chr_7	ST512	KL107	O1/O2v2	Microc_MaMV_DC
NZ_CP042320.1	5-16	5-16_chr_8	ST512	KL107	O1/O2v2	Klebsi_ST437_OXA245phi4.1
NZ_CP011980.1	500_1420	500_1420_chr_1	ST258	KL106	O1/O2v2	Salmon_ST64B
NZ_CP011980.1	500_1420	500_1420_chr_2	ST258	KL106	O1/O2v2	Escher_500465_1
NZ_CP011980.1	500_1420	500_1420_chr_3	ST258	KL106	O1/O2v2	Microc_MaMV_DC
NZ_CP011980.1	500_1420	500_1420_chr_4	ST258	KL106	O1/O2v2	Salmon_SEN34
NZ_CP011980.1	500_1420	500_1420_chr_5	ST258	KL106	O1/O2v2	Pectob_ZF40
NZ_CP011980.1	500_1420	500_1420_chr_6	ST258	KL106	O1/O2v2	Klebsi_ST512_KPC3phi13.2
NZ_CP011980.1	500_1420	500_1420_chr_7	ST258	KL106	O1/O2v2	Erwini_vB_EhrS_59
NZ_CP011980.1	500_1420	500_1420_chr_8	ST258	KL106	O1/O2v2	Entero_P4
NZ_CP011980.1	500_1420	500_1420_chr_9	ST258	KL106	O1/O2v2	Entero_P4
NZ_CP011980.1	500_1420	500_1420_chr_10	ST258	KL106	O1/O2v2	Bacill_vB_BtS_BMBtp14
NZ_CP099743.1	503666-2-2019	503666-2-2019_chr_1	ST35	KL124	O1/O2v1	Escher_500465_1
NZ_CP099743.1	503666-2-2019	503666-2-2019_chr_2	ST35	KL124	O1/O2v1	Acinet_YMC11/11/R3177
NZ_CP099743.1	503666-2-2019	503666-2-2019_chr_4	ST35	KL124	O1/O2v1	Klebsi_ST16_OXA48phi5.4
NZ_CP099743.1	503666-2-2019	503666-2-2019_chr_5	ST35	KL124	O1/O2v1	Escher_503458
NZ_CP050371.1	50595	50595_chr_1	ST11	KL24	O1/O2v1	Entero_P4
NZ_CP050371.1	50595	50595_chr_2	ST11	KL24	O1/O2v1	Entero_P4
NZ_CP050371.1	50595	50595_chr_3	ST11	KL24	O1/O2v1	Erwini_vB_EhrS_59
NZ_CP050371.1	50595	50595_chr_4	ST11	KL24	O1/O2v1	Klebsi_ST512_KPC3phi13.2
NZ_CP050371.1	50595	50595_chr_5	ST11	KL24	O1/O2v1	Salmon_vB_SosS_Oslo
NZ_CP050371.1	50595	50595_chr_6	ST11	KL24	O1/O2v1	Salmon_vB_SosS_Oslo
NZ_CP050371.1	50595	50595_chr_7	ST11	KL24	O1/O2v1	Salmon_SEN34
NZ_CP050371.1	50595	50595_chr_8	ST11	KL24	O1/O2v1	Escher_phiV10
NZ_CP050371.1	50595	50595_chr_9	ST11	KL24	O1/O2v1	Escher_500465_1
NZ_CP050371.1	50595	50595_chr_10	ST11	KL24	O1/O2v1	Entero_SfI
NZ_CP088991.1	50700	50700_chr_1	ST11	KL64	O1/O2v1	Salmon_ST64B
NZ_CP088991.1	50700	50700_chr_2	ST11	KL64	O1/O2v1	Klebsi_ST437_OXA245phi4.1
NZ_CP088991.1	50700	50700_chr_3	ST11	KL64	O1/O2v1	Escher_phiV10
NZ_CP088991.1	50700	50700_chr_4	ST11	KL64	O1/O2v1	Escher_vB_EcoM_Schickermooser
NZ_CP088991.1	50700	50700_chr_5	ST11	KL64	O1/O2v1	Salmon_SEN34
NZ_CP088991.1	50700	50700_chr_6	ST11	KL64	O1/O2v1	Cronob_ENT39118
NZ_CP088991.1	50700	50700_chr_7	ST11	KL64	O1/O2v1	Escher_HK639
NZ_CP088991.1	50700	50700_chr_9	ST11	KL64	O1/O2v1	Entero_c_1
NZ_CP088991.1	50700	50700_chr_10	ST11	KL64	O1/O2v1	Klebsi_ST512_KPC3phi13.2
NZ_CP088991.1	50700	50700_chr_11	ST11	KL64	O1/O2v1	Entero_P4
NZ_CP088991.1	50700	50700_chr_12	ST11	KL64	O1/O2v1	Entero_P4
NZ_CP050376.1	51015	51015_chr_1	ST15	KL24	O1/O2v1	Escher_phiV10
NZ_CP085740.1	51135CZ	51135CZ_chr_1	ST11	KL105	O1/O2v2	Entero_SfI
NZ_CP085740.1	51135CZ	51135CZ_chr_2	ST11	KL105	O1/O2v2	Klebsi_ST147_VIM1phi7.1
NZ_CP085740.1	51135CZ	51135CZ_chr_3	ST11	KL105	O1/O2v2	Escher_500465_1
NZ_CP085740.1	51135CZ	51135CZ_chr_4	ST11	KL105	O1/O2v2	Escher_vB_EcoM_Schickermooser
NZ_CP085740.1	51135CZ	51135CZ_chr_5	ST11	KL105	O1/O2v2	Entero_lambda
NZ_CP085740.1	51135CZ	51135CZ_chr_6	ST11	KL105	O1/O2v2	Sphing_PAU
NZ_CP085740.1	51135CZ	51135CZ_chr_7	ST11	KL105	O1/O2v2	Salmon_SEN34
NZ_CP085740.1	51135CZ	51135CZ_chr_8	ST11	KL105	O1/O2v2	Klebsi_ST512_KPC3phi13.2
NZ_CP085740.1	51135CZ	51135CZ_chr_9	ST11	KL105	O1/O2v2	Entero_P4
NZ_CP085740.1	51135CZ	51135CZ_chr_10	ST11	KL105	O1/O2v2	Entero_P4
NZ_CP085740.1	51135CZ	51135CZ_chr_11	ST11	KL105	O1/O2v2	Bacill_vB_BtS_BMBtp14
NZ_CP103560.1	5165	5165_chr_1	ST307	KL102	O1/O2v2	Salmon_118970_sal3
NZ_CP103560.1	5165	5165_chr_2	ST307	KL102	O1/O2v2	Pseudo_YMC11/02/R656
NZ_CP103560.1	5165	5165_chr_4	ST307	KL102	O1/O2v2	Escher_500465_1
NZ_CP103560.1	5165	5165_chr_5	ST307	KL102	O1/O2v2	Salmon_118970_sal3
NZ_CP103560.1	5165	5165_chr_6	ST307	KL102	O1/O2v2	Klebsi_4LV2017
NZ_CP103560.1	5165	5165_chr_7	ST307	KL102	O1/O2v2	Erwini_vB_EhrS_59
NZ_CP083032.1	5208.51	5208.51_chr_1	ST16	KL51	O3b	Escher_500465_1
NZ_CP083032.1	5208.51	5208.51_chr_2	ST16	KL51	O3b	Salmon_118970_sal3
NZ_CP083032.1	5208.51	5208.51_chr_3	ST16	KL51	O3b	Entero_mEp237
NZ_CP083032.1	5208.51	5208.51_chr_4	ST16	KL51	O3b	Klebsi_ST16_OXA48phi5.4
NZ_CP083032.1	5208.51	5208.51_chr_5	ST16	KL51	O3b	Erwini_vB_EhrS_59
NZ_CP098352.1	52977_A1	52977_A1_chr_1	ST258	KL107	O1/O2v2	Salmon_ST64B
NZ_CP098352.1	52977_A1	52977_A1_chr_2	ST258	KL107	O1/O2v2	Klebsi_ST437_OXA245phi4.1
NZ_CP098352.1	52977_A1	52977_A1_chr_3	ST258	KL107	O1/O2v2	Escher_phiV10
NZ_CP098352.1	52977_A1	52977_A1_chr_4	ST258	KL107	O1/O2v2	Escher_RCS47
NZ_CP098352.1	52977_A1	52977_A1_chr_5	ST258	KL107	O1/O2v2	Salmon_SEN34
NZ_CP098352.1	52977_A1	52977_A1_chr_6	ST258	KL107	O1/O2v2	Klebsi_ST512_KPC3phi13.2
NZ_CP098352.1	52977_A1	52977_A1_chr_7	ST258	KL107	O1/O2v2	Erwini_vB_EhrS_59
NZ_CP098352.1	52977_A1	52977_A1_chr_8	ST258	KL107	O1/O2v2	Entero_P4
NZ_CP098352.1	52977_A1	52977_A1_chr_9	ST258	KL107	O1/O2v2	Entero_P4
NZ_CP098352.1	52977_A1	52977_A1_chr_10	ST258	KL107	O1/O2v2	Escher_RCS47
NZ_CP098350.1	52980_A4	52980_A4_chr_1	ST258	KL107	O1/O2v2	Entero_SfI
NZ_CP098350.1	52980_A4	52980_A4_chr_2	ST258	KL107	O1/O2v2	Klebsi_ST437_OXA245phi4.1
NZ_CP098350.1	52980_A4	52980_A4_chr_3	ST258	KL107	O1/O2v2	Escher_phiV10
NZ_CP098350.1	52980_A4	52980_A4_chr_4	ST258	KL107	O1/O2v2	Escher_RCS47
NZ_CP098350.1	52980_A4	52980_A4_chr_5	ST258	KL107	O1/O2v2	Salmon_SEN34
NZ_CP098350.1	52980_A4	52980_A4_chr_6	ST258	KL107	O1/O2v2	Klebsi_ST512_KPC3phi13.2
NZ_CP098350.1	52980_A4	52980_A4_chr_7	ST258	KL107	O1/O2v2	Erwini_vB_EhrS_59
NZ_CP098350.1	52980_A4	52980_A4_chr_8	ST258	KL107	O1/O2v2	Entero_P4
NZ_CP098350.1	52980_A4	52980_A4_chr_9	ST258	KL107	O1/O2v2	Entero_P4
NZ_CP098350.1	52980_A4	52980_A4_chr_10	ST258	KL107	O1/O2v2	Escher_RCS47
NZ_CP098347.1	52984_A8	52984_A8_chr_1	ST258	KL107	O1/O2v2	Entero_SfI
NZ_CP098347.1	52984_A8	52984_A8_chr_2	ST258	KL107	O1/O2v2	Klebsi_ST437_OXA245phi4.1
NZ_CP098347.1	52984_A8	52984_A8_chr_3	ST258	KL107	O1/O2v2	Escher_phiV10
NZ_CP098347.1	52984_A8	52984_A8_chr_4	ST258	KL107	O1/O2v2	Escher_RCS47
NZ_CP098347.1	52984_A8	52984_A8_chr_5	ST258	KL107	O1/O2v2	Salmon_SEN34
NZ_CP098347.1	52984_A8	52984_A8_chr_6	ST258	KL107	O1/O2v2	Klebsi_ST512_KPC3phi13.2
NZ_CP098347.1	52984_A8	52984_A8_chr_7	ST258	KL107	O1/O2v2	Erwini_vB_EhrS_59
NZ_CP098347.1	52984_A8	52984_A8_chr_8	ST258	KL107	O1/O2v2	Entero_P4
NZ_CP098347.1	52984_A8	52984_A8_chr_9	ST258	KL107	O1/O2v2	Entero_P4
NZ_CP098347.1	52984_A8	52984_A8_chr_10	ST258	KL107	O1/O2v2	Escher_RCS47
NZ_CP098343.1	53009_G1	53009_G1_chr_1	ST258	KL106	O1/O2v2	Entero_SfI
NZ_CP098343.1	53009_G1	53009_G1_chr_2	ST258	KL106	O1/O2v2	Escher_500465_1
NZ_CP098343.1	53009_G1	53009_G1_chr_3	ST258	KL106	O1/O2v2	Escher_RCS47
NZ_CP098343.1	53009_G1	53009_G1_chr_5	ST258	KL106	O1/O2v2	Salmon_SEN34
NZ_CP098343.1	53009_G1	53009_G1_chr_6	ST258	KL106	O1/O2v2	Escher_RCS47
NZ_CP098343.1	53009_G1	53009_G1_chr_7	ST258	KL106	O1/O2v2	Escher_HK639
NZ_CP098343.1	53009_G1	53009_G1_chr_8	ST258	KL106	O1/O2v2	Pectob_ZF40
NZ_CP098343.1	53009_G1	53009_G1_chr_9	ST258	KL106	O1/O2v2	Klebsi_ST512_KPC3phi13.2
NZ_CP098343.1	53009_G1	53009_G1_chr_10	ST258	KL106	O1/O2v2	Erwini_vB_EhrS_59
NZ_CP098343.1	53009_G1	53009_G1_chr_11	ST258	KL106	O1/O2v2	Entero_P4
NZ_CP098343.1	53009_G1	53009_G1_chr_12	ST258	KL106	O1/O2v2	Entero_P4
NZ_CP098340.1	53015_G7	53015_G7_chr_1	ST258	KL106	O1/O2v2	Shigel_SfIV
NZ_CP098340.1	53015_G7	53015_G7_chr_2	ST258	KL106	O1/O2v2	Escher_500465_1
NZ_CP098340.1	53015_G7	53015_G7_chr_3	ST258	KL106	O1/O2v2	Escher_RCS47
NZ_CP098340.1	53015_G7	53015_G7_chr_4	ST258	KL106	O1/O2v2	Salmon_SEN34
NZ_CP098340.1	53015_G7	53015_G7_chr_5	ST258	KL106	O1/O2v2	Escher_RCS47
NZ_CP098340.1	53015_G7	53015_G7_chr_6	ST258	KL106	O1/O2v2	Escher_HK639
NZ_CP098340.1	53015_G7	53015_G7_chr_7	ST258	KL106	O1/O2v2	Pectob_ZF40
NZ_CP098340.1	53015_G7	53015_G7_chr_8	ST258	KL106	O1/O2v2	Klebsi_ST512_KPC3phi13.2
NZ_CP098340.1	53015_G7	53015_G7_chr_9	ST258	KL106	O1/O2v2	Erwini_vB_EhrS_59
NZ_CP098340.1	53015_G7	53015_G7_chr_10	ST258	KL106	O1/O2v2	Entero_P4
NZ_CP098340.1	53015_G7	53015_G7_chr_11	ST258	KL106	O1/O2v2	Entero_P4
NZ_CP098338.1	53022_J1	53022_J1_chr_1	ST258	KL107	OL102	Entero_SfI
NZ_CP098338.1	53022_J1	53022_J1_chr_2	ST258	KL107	OL102	Escher_RCS47
NZ_CP098338.1	53022_J1	53022_J1_chr_3	ST258	KL107	OL102	Klebsi_ST437_OXA245phi4.1
NZ_CP098338.1	53022_J1	53022_J1_chr_4	ST258	KL107	OL102	Escher_phiV10
NZ_CP098338.1	53022_J1	53022_J1_chr_5	ST258	KL107	OL102	Microc_MaMV_DC
NZ_CP098338.1	53022_J1	53022_J1_chr_6	ST258	KL107	OL102	Salmon_SEN34
NZ_CP098338.1	53022_J1	53022_J1_chr_7	ST258	KL107	OL102	Klebsi_ST512_KPC3phi13.2
NZ_CP098338.1	53022_J1	53022_J1_chr_8	ST258	KL107	OL102	Erwini_vB_EhrS_59
NZ_CP098338.1	53022_J1	53022_J1_chr_9	ST258	KL107	OL102	Entero_P4
NZ_CP098338.1	53022_J1	53022_J1_chr_10	ST258	KL107	OL102	Entero_P4
NZ_CP098335.1	53023_J2	53023_J2_chr_1	ST258	KL107	OL102	Salmon_ST64B
NZ_CP098335.1	53023_J2	53023_J2_chr_2	ST258	KL107	OL102	Escher_RCS47
NZ_CP098335.1	53023_J2	53023_J2_chr_3	ST258	KL107	OL102	Klebsi_ST437_OXA245phi4.1
NZ_CP098335.1	53023_J2	53023_J2_chr_4	ST258	KL107	OL102	Escher_phiV10
NZ_CP098335.1	53023_J2	53023_J2_chr_5	ST258	KL107	OL102	Escher_vB_EcoM_Schickermooser
NZ_CP098335.1	53023_J2	53023_J2_chr_6	ST258	KL107	OL102	Microc_Ma_LMM01
NZ_CP098335.1	53023_J2	53023_J2_chr_7	ST258	KL107	OL102	Salmon_SEN34
NZ_CP098335.1	53023_J2	53023_J2_chr_8	ST258	KL107	OL102	Klebsi_ST512_KPC3phi13.2
NZ_CP098335.1	53023_J2	53023_J2_chr_9	ST258	KL107	OL102	Erwini_vB_EhrS_59
NZ_CP098335.1	53023_J2	53023_J2_chr_10	ST258	KL107	OL102	Entero_P4
NZ_CP098335.1	53023_J2	53023_J2_chr_11	ST258	KL107	OL102	Entero_P4
NZ_CP088988.1	53322	53322_chr_1	newST	KL2	O1/O2v2	Mycoba_Enkosi
NZ_CP088988.1	53322	53322_chr_2	newST	KL2	O1/O2v2	Escher_500465_1
NZ_CP088988.1	53322	53322_chr_3	newST	KL2	O1/O2v2	Salmon_SPN1S
NZ_CP088988.1	53322	53322_chr_4	newST	KL2	O1/O2v2	Prochl_P_TIM68
NZ_CP088985.1	53334	53334_chr_1	ST218	KL57	O1/O2v2	Entero_P4
NZ_CP088985.1	53334	53334_chr_2	ST218	KL57	O1/O2v2	Entero_Tyrion
NZ_CP088982.1	53357	53357_chr_1	ST23	KL1	O1/O2v2	Escher_500465_1
NZ_CP088982.1	53357	53357_chr_2	ST23	KL1	O1/O2v2	Salmon_SPN1S
NZ_CP088982.1	53357	53357_chr_3	ST23	KL1	O1/O2v2	Salmon_118970_sal3
NZ_CP088982.1	53357	53357_chr_4	ST23	KL1	O1/O2v2	Pseudo_MP1412
NZ_CP088982.1	53357	53357_chr_5	ST23	KL1	O1/O2v2	Serrat_vB_SmaA_3M
NZ_CP088982.1	53357	53357_chr_6	ST23	KL1	O1/O2v2	Klebsi_phiKO2
NZ_CP089021.1	53370	53370_chr_1	ST23	KL1	O1/O2v2	Escher_500465_1
NZ_CP089021.1	53370	53370_chr_2	ST23	KL1	O1/O2v2	Salmon_SPN1S
NZ_CP089021.1	53370	53370_chr_3	ST23	KL1	O1/O2v2	Salmon_118970_sal3
NZ_CP089021.1	53370	53370_chr_4	ST23	KL1	O1/O2v2	Bacill_SP_15
NZ_CP089021.1	53370	53370_chr_5	ST23	KL1	O1/O2v2	Ralsto_RSY1
NZ_CP089021.1	53370	53370_chr_6	ST23	KL1	O1/O2v2	Klebsi_phiKO2
NZ_CP089014.1	53374	53374_chr_1	ST11	KL64	O1/O2v1	Salmon_ST64B
NZ_CP089014.1	53374	53374_chr_2	ST11	KL64	O1/O2v1	Klebsi_ST437_OXA245phi4.1
NZ_CP089014.1	53374	53374_chr_3	ST11	KL64	O1/O2v1	Escher_phiV10
NZ_CP089014.1	53374	53374_chr_4	ST11	KL64	O1/O2v1	Salmon_SEN34
NZ_CP089014.1	53374	53374_chr_5	ST11	KL64	O1/O2v1	Pectob_ZF40
NZ_CP089014.1	53374	53374_chr_6	ST11	KL64	O1/O2v1	Klebsi_ST512_KPC3phi13.2
NZ_CP089014.1	53374	53374_chr_7	ST11	KL64	O1/O2v1	Entero_P4
NZ_CP089014.1	53374	53374_chr_8	ST11	KL64	O1/O2v1	Entero_P4
NZ_CP089014.1	53374	53374_chr_9	ST11	KL64	O1/O2v1	Escher_503458
NZ_CP103512.1	5531	5531_chr_1	ST23	KL1	O1/O2v2	Escher_500465_1
NZ_CP103512.1	5531	5531_chr_2	ST23	KL1	O1/O2v2	Salmon_SPN1S
NZ_CP103512.1	5531	5531_chr_3	ST23	KL1	O1/O2v2	Entero_mEp390
NZ_CP103512.1	5531	5531_chr_4	ST23	KL1	O1/O2v2	Mycoba_Heldan
NZ_CP103512.1	5531	5531_chr_5	ST23	KL1	O1/O2v2	Aeromo_vB_AsaM_56
NZ_CP103512.1	5531	5531_chr_6	ST23	KL1	O1/O2v2	Proteu_VB_PmiS_Isfahan
NZ_CP103512.1	5531	5531_chr_7	ST23	KL1	O1/O2v2	Klebsi_phiKO2
NZ_CP103503.1	5547	5547_chr_1	ST14	KL2	O1/O2v1	Synech_S_CAM8
NZ_CP103503.1	5547	5547_chr_2	ST14	KL2	O1/O2v1	Escher_500465_1
NZ_CP103503.1	5547	5547_chr_3	ST14	KL2	O1/O2v1	Escher_HK639
NZ_CP103503.1	5547	5547_chr_4	ST14	KL2	O1/O2v1	Escher_RCS47
NZ_CP103503.1	5547	5547_chr_5	ST14	KL2	O1/O2v1	Entero_phiP27
NZ_CP103503.1	5547	5547_chr_6	ST14	KL2	O1/O2v1	Erwini_vB_EhrS_59
NZ_CP103503.1	5547	5547_chr_7	ST14	KL2	O1/O2v1	Klebsi_ST16_OXA48phi5.4
NZ_CP043932.1	555	555_chr_1	ST3410	KL125	O5	Klebsi_phiKO2
NZ_CP043932.1	555	555_chr_2	ST3410	KL125	O5	Edward_GF_2
NZ_CP043932.1	555	555_chr_3	ST3410	KL125	O5	Synech_S_CBS1
NZ_CP043932.1	555	555_chr_4	ST3410	KL125	O5	Escher_500465_1
NZ_CP043932.1	555	555_chr_5	ST3410	KL125	O5	Escher_phiV10
NZ_CP102077.1	5589	55891_chr_1	ST273	KL74	O3b	Klebsi_ST147_VIM1phi7.1
NZ_CP102077.1	5589	55891_chr_2	ST273	KL74	O3b	Stx2_c_1717
NZ_CP102077.1	5589	55891_chr_3	ST273	KL74	O3b	Stx2_c_1717
NZ_CP102077.1	5589	55891_chr_4	ST273	KL74	O3b	Shigel_SfIV
NZ_CP102077.1	5589	55891_chr_5	ST273	KL74	O3b	Entero_P4
NZ_CP102077.1	5589	55891_chr_6	ST273	KL74	O3b	Escher_503458
NZ_CP103499.1	5589	55892_chr_1	ST45	KL24	O1/O2v1	Shigel_SfIV
NZ_CP103499.1	5589	55892_chr_3	ST45	KL24	O1/O2v1	Salmon_118970_sal3
NZ_CP103499.1	5589	55892_chr_4	ST45	KL24	O1/O2v1	Klebsi_ST16_OXA48phi5.4
NZ_CP103499.1	5589	55892_chr_5	ST45	KL24	O1/O2v1	Erwini_vB_EhrS_59
NZ_CP089012.1	56575	56575_chr_1	ST86	KL2	O1/O2v1	Entero_mEp234
NZ_CP089012.1	56575	56575_chr_2	ST86	KL2	O1/O2v1	Salmon_118970_sal3
NZ_CP089012.1	56575	56575_chr_3	ST86	KL2	O1/O2v1	Edward_GF_2
NZ_CP089001.1	56661	56661_chr_1	ST147	KL64	O1/O2v1	Klebsi_ST147_VIM1phi7.1
NZ_CP089001.1	56661	56661_chr_2	ST147	KL64	O1/O2v1	Escher_500465_1
NZ_CP089001.1	56661	56661_chr_3	ST147	KL64	O1/O2v1	Salmon_118970_sal3
NZ_CP089001.1	56661	56661_chr_4	ST147	KL64	O1/O2v1	Salmon_SEN34
NZ_CP089001.1	56661	56661_chr_5	ST147	KL64	O1/O2v1	Entero_mEp237
NZ_CP089001.1	56661	56661_chr_6	ST147	KL64	O1/O2v1	Bacill_vB_BtS_BMBtp14
NZ_CP088126.1	57	57_chr_1	ST11	KL167	O4	Salmon_ST64B
NZ_CP088126.1	57	57_chr_2	ST11	KL167	O4	Escher_500465_1
NZ_CP088126.1	57	57_chr_3	ST11	KL167	O4	Escher_RCS47
NZ_CP088126.1	57	57_chr_4	ST11	KL167	O4	Bacter_APSE_2
NZ_CP088126.1	57	57_chr_5	ST11	KL167	O4	Cronob_ESSI_2
NZ_CP088126.1	57	57_chr_6	ST11	KL167	O4	Klebsi_4LV2017
NZ_CP088126.1	57	57_chr_7	ST11	KL167	O4	Entero_P4
NZ_CP088126.1	57	57_chr_8	ST11	KL167	O4	Entero_P4
NZ_CP088126.1	57	57_chr_9	ST11	KL167	O4	Bacill_vB_BtS_BMBtp14
NZ_CP085729.1	59062CZ	59062CZ_chr_1	ST54	KL14	O3b	Entero_mEp237
NZ_CP085729.1	59062CZ	59062CZ_chr_2	ST54	KL14	O3b	Salmon_SEN34
NZ_CP085729.1	59062CZ	59062CZ_chr_3	ST54	KL14	O3b	Escher_phiV10
NZ_CP085729.1	59062CZ	59062CZ_chr_4	ST54	KL14	O3b	Salmon_SPN3UB
NZ_CP085729.1	59062CZ	59062CZ_chr_5	ST54	KL14	O3b	Klebsi_ST15_OXA48phi14.1
NZ_CP085729.1	59062CZ	59062CZ_chr_6	ST54	KL14	O3b	Stx2_c_Stx2a_F451
NZ_CP085729.1	59062CZ	59062CZ_chr_7	ST54	KL14	O3b	Pectob_ZF40
NZ_CP068602.1	59493	59493_chr_1	ST258	KL74	O3b	Entero_SfI
NZ_CP068602.1	59493	59493_chr_2	ST258	KL74	O3b	Escher_500465_1
NZ_CP068602.1	59493	59493_chr_3	ST258	KL74	O3b	Escher_SH2026Stx1
NZ_CP068602.1	59493	59493_chr_4	ST258	KL74	O3b	Escher_SH2026Stx1
NZ_CP068602.1	59493	59493_chr_5	ST258	KL74	O3b	Shigel_SfIV
NZ_CP068602.1	59493	59493_chr_6	ST258	KL74	O3b	Microc_Ma_LMM01
NZ_CP068602.1	59493	59493_chr_7	ST258	KL74	O3b	Salmon_SEN34
NZ_CP068602.1	59493	59493_chr_8	ST258	KL74	O3b	Pectob_ZF40
NZ_CP068602.1	59493	59493_chr_9	ST258	KL74	O3b	Klebsi_ST512_KPC3phi13.2
NZ_CP068602.1	59493	59493_chr_10	ST258	KL74	O3b	Erwini_vB_EhrS_59
NZ_CP068602.1	59493	59493_chr_11	ST258	KL74	O3b	Entero_P4
NZ_CP068602.1	59493	59493_chr_12	ST258	KL74	O3b	Entero_P4
NZ_CP097228.1	5	5_chr_1	ST14	KL2	O1/O2v1	Erwini_vB_EhrS_59
NZ_CP097228.1	5	5_chr_3	ST14	KL2	O1/O2v1	Escher_HK639
NZ_CP097228.1	5	5_chr_4	ST14	KL2	O1/O2v1	Entero_phiP27
NZ_CP026495.1	616	616_chr_1	ST307	KL102	O1/O2v2	Burkho_phi1026b
NZ_CP026495.1	616	616_chr_3	ST307	KL102	O1/O2v2	Escher_500465_1
NZ_CP026495.1	616	616_chr_4	ST307	KL102	O1/O2v2	Salmon_118970_sal3
NZ_OX337252.1	65326252-51f1-11ec-980a-fa163eea3084	65326252_chr_1_1	ST1788	KL2	O1/O2v2	Entero_P4
NZ_OX337252.1	65326252-51f1-11ec-980a-fa163eea3084	65326252_chr_1_2	ST1788	KL2	O1/O2v2	Escher_500465_1
NZ_OX337252.1	65326252-51f1-11ec-980a-fa163eea3084	65326252_chr_1_3	ST1788	KL2	O1/O2v2	Entero_phiP27
NZ_OX337252.1	65326252-51f1-11ec-980a-fa163eea3084	65326252_chr_1_4	ST1788	KL2	O1/O2v2	Entero_HK140
NZ_CP083026.1	6604.68	6604.68_chr_1	ST101	KL17	O1/O2v1	Entero_phiP27
NZ_CP083026.1	6604.68	6604.68_chr_2	ST101	KL17	O1/O2v1	Escher_500465_1
NZ_CP083026.1	6604.68	6604.68_chr_3	ST101	KL17	O1/O2v1	Entero_phiP27
NZ_CP083026.1	6604.68	6604.68_chr_4	ST101	KL17	O1/O2v1	Escher_phiV10
NZ_CP083026.1	6604.68	6604.68_chr_5	ST101	KL17	O1/O2v1	Escher_vB_EcoM_Schickermooser
NZ_CP083026.1	6604.68	6604.68_chr_6	ST101	KL17	O1/O2v1	Salmon_118970_sal3
NZ_CP083026.1	6604.68	6604.68_chr_7	ST101	KL17	O1/O2v1	Klebsi_3LV2017
NZ_CP083026.1	6604.68	6604.68_chr_8	ST101	KL17	O1/O2v1	Erwini_vB_EhrS_59
NZ_CP083026.1	6604.68	6604.68_chr_9	ST101	KL17	O1/O2v1	Entero_P4
NZ_CP083021.1	6611.48	6611.48_chr_1	ST101	KL17	O1/O2v1	Entero_phiP27
NZ_CP083021.1	6611.48	6611.48_chr_2	ST101	KL17	O1/O2v1	Escher_500465_1
NZ_CP083021.1	6611.48	6611.48_chr_3	ST101	KL17	O1/O2v1	Paenib_Yerffej
NZ_CP083021.1	6611.48	6611.48_chr_4	ST101	KL17	O1/O2v1	Escher_phiV10
NZ_CP083021.1	6611.48	6611.48_chr_5	ST101	KL17	O1/O2v1	Escher_vB_EcoM_Schickermooser
NZ_CP083021.1	6611.48	6611.48_chr_6	ST101	KL17	O1/O2v1	Salmon_118970_sal3
NZ_CP083021.1	6611.48	6611.48_chr_7	ST101	KL17	O1/O2v1	Klebsi_3LV2017
NZ_CP083021.1	6611.48	6611.48_chr_8	ST101	KL17	O1/O2v1	Erwini_vB_EhrS_59
NZ_CP083021.1	6611.48	6611.48_chr_9	ST101	KL17	O1/O2v1	Entero_P4
NZ_CP083016.1	6709.15-I	6709.15-I_chr_1	ST101	KL17	O1/O2v1	Entero_cdtI
NZ_CP083016.1	6709.15-I	6709.15-I_chr_2	ST101	KL17	O1/O2v1	Escher_500465_1
NZ_CP083016.1	6709.15-I	6709.15-I_chr_3	ST101	KL17	O1/O2v1	Paenib_Yerffej
NZ_CP083016.1	6709.15-I	6709.15-I_chr_4	ST101	KL17	O1/O2v1	Escher_phiV10
NZ_CP083016.1	6709.15-I	6709.15-I_chr_5	ST101	KL17	O1/O2v1	Escher_vB_EcoM_Schickermooser
NZ_CP083016.1	6709.15-I	6709.15-I_chr_6	ST101	KL17	O1/O2v1	Salmon_118970_sal3
NZ_CP083016.1	6709.15-I	6709.15-I_chr_7	ST101	KL17	O1/O2v1	Klebsi_3LV2017
NZ_CP083016.1	6709.15-I	6709.15-I_chr_8	ST101	KL17	O1/O2v1	Erwini_vB_EhrS_59
NZ_CP083016.1	6709.15-I	6709.15-I_chr_9	ST101	KL17	O1/O2v1	Entero_P4
NZ_CP083011.1	6710.71	6710.71_chr_1	ST101	KL17	O1/O2v1	Escher_500465_1
NZ_CP083011.1	6710.71	6710.71_chr_2	ST101	KL17	O1/O2v1	Entero_phiP27
NZ_CP083011.1	6710.71	6710.71_chr_3	ST101	KL17	O1/O2v1	Escher_phiV10
NZ_CP083011.1	6710.71	6710.71_chr_4	ST101	KL17	O1/O2v1	Salmon_118970_sal3
NZ_CP083011.1	6710.71	6710.71_chr_5	ST101	KL17	O1/O2v1	Klebsi_3LV2017
NZ_CP083011.1	6710.71	6710.71_chr_6	ST101	KL17	O1/O2v1	Erwini_vB_EhrS_59
NZ_CP083011.1	6710.71	6710.71_chr_7	ST101	KL17	O1/O2v1	Entero_P4
NZ_CP083011.1	6710.71	6710.71_chr_8	ST101	KL17	O1/O2v1	Shigel_SfII
NZ_CP083007.1	6711.43	6711.43_chr_1	ST258	KL106	O1/O2v2	Entero_SfI
NZ_CP083007.1	6711.43	6711.43_chr_2	ST258	KL106	O1/O2v2	Escher_500465_1
NZ_CP083007.1	6711.43	6711.43_chr_3	ST258	KL106	O1/O2v2	Escher_phiV10
NZ_CP083007.1	6711.43	6711.43_chr_4	ST258	KL106	O1/O2v2	Microc_MaMV_DC
NZ_CP083007.1	6711.43	6711.43_chr_5	ST258	KL106	O1/O2v2	Salmon_SEN34
NZ_CP083007.1	6711.43	6711.43_chr_6	ST258	KL106	O1/O2v2	Klebsi_ST512_KPC3phi13.2
NZ_CP083007.1	6711.43	6711.43_chr_7	ST258	KL106	O1/O2v2	Erwini_vB_EhrS_59
NZ_CP083007.1	6711.43	6711.43_chr_8	ST258	KL106	O1/O2v2	Entero_P4
NZ_CP083007.1	6711.43	6711.43_chr_9	ST258	KL106	O1/O2v2	Entero_P4
NZ_CP083007.1	6711.43	6711.43_chr_10	ST258	KL106	O1/O2v2	Bacill_vB_BtS_BMBtp14
NZ_CP083000.1	6712.08	6712.08_chr_2	ST101	KL17	O1/O2v1	Escher_500465_1
NZ_CP083000.1	6712.08	6712.08_chr_3	ST101	KL17	O1/O2v1	Salmon_vB_SosS_Oslo
NZ_CP083000.1	6712.08	6712.08_chr_4	ST101	KL17	O1/O2v1	Escher_phiV10
NZ_CP083000.1	6712.08	6712.08_chr_5	ST101	KL17	O1/O2v1	Salmon_118970_sal3
NZ_CP083000.1	6712.08	6712.08_chr_6	ST101	KL17	O1/O2v1	Entero_phiT5282H
NZ_CP083000.1	6712.08	6712.08_chr_7	ST101	KL17	O1/O2v1	Erwini_vB_EhrS_59
NZ_CP083000.1	6712.08	6712.08_chr_8	ST101	KL17	O1/O2v1	Entero_P4
NZ_CP082995.1	6911.28	6911.28_chr_1	ST437	KL36	O4	Entero_SfI
NZ_CP082995.1	6911.28	6911.28_chr_2	ST437	KL36	O4	Klebsi_ST437_OXA245phi4.1
NZ_CP082995.1	6911.28	6911.28_chr_3	ST437	KL36	O4	Salmon_SEN34
NZ_CP082995.1	6911.28	6911.28_chr_4	ST437	KL36	O4	Cronob_ENT39118
NZ_CP082995.1	6911.28	6911.28_chr_5	ST437	KL36	O4	Escher_HK639
NZ_CP082995.1	6911.28	6911.28_chr_6	ST437	KL36	O4	Klebsi_ST512_KPC3phi13.2
NZ_CP082995.1	6911.28	6911.28_chr_7	ST437	KL36	O4	Escher_TL_2011b
NZ_CP082995.1	6911.28	6911.28_chr_8	ST437	KL36	O4	Entero_P4
NZ_CP082995.1	6911.28	6911.28_chr_9	ST437	KL36	O4	Entero_P4
NZ_CP082995.1	6911.28	6911.28_chr_10	ST437	KL36	O4	Escher_503458
NZ_CP082988.1	7008.20	7008.20_chr_1	ST147	KL64	O1/O2v1	Klebsi_ST147_VIM1phi7.1
NZ_CP082988.1	7008.20	7008.20_chr_2	ST147	KL64	O1/O2v1	Salmon_118970_sal3
NZ_CP082988.1	7008.20	7008.20_chr_3	ST147	KL64	O1/O2v1	Erwini_vB_EhrS_59
NZ_CP082988.1	7008.20	7008.20_chr_4	ST147	KL64	O1/O2v1	Escher_503458
NZ_CP082985.1	7011.62	7011.62_chr_1	ST152	KL46	O3b	Entero_P4
NZ_CP082985.1	7011.62	7011.62_chr_2	ST152	KL46	O3b	Escher_500465_1
NZ_CP082985.1	7011.62	7011.62_chr_3	ST152	KL46	O3b	Salmon_118970_sal3
NZ_CP082985.1	7011.62	7011.62_chr_4	ST152	KL46	O3b	Klebsi_ST16_OXA48phi5.4
NZ_CP082985.1	7011.62	7011.62_chr_5	ST152	KL46	O3b	Klebsi_phiKO2
NZ_CP082985.1	7011.62	7011.62_chr_6	ST152	KL46	O3b	Salmon_SEN8
NZ_CP082985.1	7011.62	7011.62_chr_7	ST152	KL46	O3b	Erwini_vB_EhrS_59
NZ_CP082985.1	7011.62	7011.62_chr_8	ST152	KL46	O3b	Entero_P4
NZ_CP030292.1	721005	721005er_chr_1	ST11	KL47	OL101	Salmon_ST64B
NZ_CP030292.1	721005	721005er_chr_2	ST11	KL47	OL101	Klebsi_ST437_OXA245phi4.1
NZ_CP030292.1	721005	721005er_chr_3	ST11	KL47	OL101	Escher_phiV10
NZ_CP030292.1	721005	721005er_chr_4	ST11	KL47	OL101	Escher_phAPEC8
NZ_CP030292.1	721005	721005er_chr_5	ST11	KL47	OL101	Vibrio_12B12
NZ_CP030292.1	721005	721005er_chr_6	ST11	KL47	OL101	Salmon_SEN34
NZ_CP030292.1	721005	721005er_chr_7	ST11	KL47	OL101	Escher_HK639
NZ_CP030292.1	721005	721005er_chr_8	ST11	KL47	OL101	Klebsi_phiKO2
NZ_CP030292.1	721005	721005er_chr_9	ST11	KL47	OL101	Phage_Gifsy_1
NZ_CP030292.1	721005	721005er_chr_10	ST11	KL47	OL101	Klebsi_ST512_KPC3phi13.2
NZ_CP030292.1	721005	721005er_chr_11	ST11	KL47	OL101	Entero_P4
NZ_CP030292.1	721005	721005er_chr_12	ST11	KL47	OL101	Entero_P4
NZ_CP022997.1	721005	721005yi_chr_1	ST11	KL47	OL101	Escher_phAPEC8
NZ_CP022997.1	721005	721005yi_chr_2	ST11	KL47	OL101	Vibrio_12B12
NZ_CP022997.1	721005	721005yi_chr_3	ST11	KL47	OL101	Salmon_SEN34
NZ_CP022997.1	721005	721005yi_chr_4	ST11	KL47	OL101	Escher_HK639
NZ_CP022997.1	721005	721005yi_chr_5	ST11	KL47	OL101	Klebsi_phiKO2
NZ_CP022997.1	721005	721005yi_chr_6	ST11	KL47	OL101	Phage_Gifsy_1
NZ_CP022997.1	721005	721005yi_chr_7	ST11	KL47	OL101	Klebsi_ST512_KPC3phi13.2
NZ_CP022997.1	721005	721005yi_chr_8	ST11	KL47	OL101	Entero_P4
NZ_CP022997.1	721005	721005yi_chr_9	ST11	KL47	OL101	Entero_P4
NZ_CP022997.1	721005	721005yi_chr_10	ST11	KL47	OL101	Shigel_SfIV
NZ_CP022997.1	721005	721005yi_chr_11	ST11	KL47	OL101	Klebsi_ST437_OXA245phi4.1
NZ_CP022997.1	721005	721005yi_chr_12	ST11	KL47	OL101	Escher_phiV10
NZ_CP042317.1	74-17	74-17_chr_1	ST307	KL107	O1/O2v2	Escher_500465_1
NZ_CP099748.1	806883-10-2019	806883-10-2019_chr_1	ST35	KL124	O1/O2v1	Escher_500465_1
NZ_CP099748.1	806883-10-2019	806883-10-2019_chr_2	ST35	KL124	O1/O2v1	Acinet_YMC11/11/R3177
NZ_CP099748.1	806883-10-2019	806883-10-2019_chr_4	ST35	KL124	O1/O2v1	Klebsi_ST16_OXA48phi5.4
NZ_CP099748.1	806883-10-2019	806883-10-2019_chr_5	ST35	KL124	O1/O2v1	Bacill_vB_BtS_BMBtp14
NZ_CP017985.1	825795-1	825795-1_chr_1	ST147	KL64	O1/O2v1	Klebsi_ST147_VIM1phi7.1
NZ_CP017985.1	825795-1	825795-1_chr_2	ST147	KL64	O1/O2v1	Salmon_118970_sal3
NZ_CP017985.1	825795-1	825795-1_chr_3	ST147	KL64	O1/O2v1	Clostr_phiCDHM14
NZ_CP017985.1	825795-1	825795-1_chr_4	ST147	KL64	O1/O2v1	Entero_mEp237
NZ_CP017985.1	825795-1	825795-1_chr_5	ST147	KL64	O1/O2v1	Escher_503458
NZ_CP109973.1	857	857_chr_1	ST11	KL64	O1/O2v1	Salmon_118970_sal3
NZ_CP109973.1	857	857_chr_2	ST11	KL64	O1/O2v1	Escher_RCS47
NZ_CP109973.1	857	857_chr_3	ST11	KL64	O1/O2v1	Klebsi_ST437_OXA245phi4.1
NZ_CP109973.1	857	857_chr_4	ST11	KL64	O1/O2v1	Escher_phiV10
NZ_CP109973.1	857	857_chr_5	ST11	KL64	O1/O2v1	Entero_phi92
NZ_CP109973.1	857	857_chr_6	ST11	KL64	O1/O2v1	Salmon_SEN34
NZ_CP109973.1	857	857_chr_7	ST11	KL64	O1/O2v1	Entero_P1
NZ_CP109973.1	857	857_chr_8	ST11	KL64	O1/O2v1	Escher_HK639
NZ_CP109973.1	857	857_chr_9	ST11	KL64	O1/O2v1	Klebsi_phiKO2
NZ_CP109973.1	857	857_chr_10	ST11	KL64	O1/O2v1	Entero_mEp237
NZ_CP109973.1	857	857_chr_11	ST11	KL64	O1/O2v1	Klebsi_ST512_KPC3phi13.2
NZ_CP109973.1	857	857_chr_12	ST11	KL64	O1/O2v1	Entero_P4
NZ_CP109973.1	857	857_chr_13	ST11	KL64	O1/O2v1	Entero_P4
NZ_CP085889.1	8695	8695_chr_1	ST11	KL64	O1/O2v1	Salmon_118970_sal3
NZ_CP085889.1	8695	8695_chr_2	ST11	KL64	O1/O2v1	Klebsi_ST437_OXA245phi4.1
NZ_CP085889.1	8695	8695_chr_3	ST11	KL64	O1/O2v1	Escher_phiV10
NZ_CP085889.1	8695	8695_chr_4	ST11	KL64	O1/O2v1	Entero_phi92
NZ_CP085889.1	8695	8695_chr_5	ST11	KL64	O1/O2v1	Salmon_SEN34
NZ_CP085889.1	8695	8695_chr_6	ST11	KL64	O1/O2v1	Cronob_ENT39118
NZ_CP085889.1	8695	8695_chr_7	ST11	KL64	O1/O2v1	Escher_HK639
NZ_CP085889.1	8695	8695_chr_8	ST11	KL64	O1/O2v1	Klebsi_phiKO2
NZ_CP085889.1	8695	8695_chr_9	ST11	KL64	O1/O2v1	Entero_c_1
NZ_CP085889.1	8695	8695_chr_10	ST11	KL64	O1/O2v1	Klebsi_ST512_KPC3phi13.2
NZ_CP085889.1	8695	8695_chr_11	ST11	KL64	O1/O2v1	Entero_P4
NZ_CP085889.1	8695	8695_chr_12	ST11	KL64	O1/O2v1	Entero_P4
NZ_CP042315.1	89-17	89-17_chr_1	ST307	KL107	O1/O2v2	Escher_503458
NZ_CP042315.1	89-17	89-17_chr_2	ST307	KL107	O1/O2v2	Escher_500465_1
NZ_CP042314.1	90-17	90-17_chr_1	ST307	KL107	O1/O2v2	Escher_500465_1
NZ_CP071819.1	90CM2	90CM2_chr_1	ST17	KL25	O5	Klebsi_ST147_VIM1phi7.1
NZ_CP071819.1	90CM2	90CM2_chr_2	ST17	KL25	O5	Escher_500465_1
NZ_CP071819.1	90CM2	90CM2_chr_3	ST17	KL25	O5	Entero_Tyrion
NZ_CP071819.1	90CM2	90CM2_chr_4	ST17	KL25	O5	Entero_mEp235
NZ_CP071819.1	90CM2	90CM2_chr_5	ST17	KL25	O5	Entero_P4
NZ_CP022882.1	911021	911021_chr_1	ST11	KL47	OL101	Salmon_SEN34
NZ_CP022882.1	911021	911021_chr_2	ST11	KL47	OL101	Salmon_vB_SosS_Oslo
NZ_CP022882.1	911021	911021_chr_3	ST11	KL47	OL101	Escher_HK639
NZ_CP022882.1	911021	911021_chr_4	ST11	KL47	OL101	Klebsi_phiKO2
NZ_CP022882.1	911021	911021_chr_5	ST11	KL47	OL101	Klebsi_ST512_KPC3phi13.2
NZ_CP022882.1	911021	911021_chr_6	ST11	KL47	OL101	Entero_P4
NZ_CP022882.1	911021	911021_chr_7	ST11	KL47	OL101	Entero_P4
NZ_CP022882.1	911021	911021_chr_8	ST11	KL47	OL101	Entero_SfI
NZ_CP022882.1	911021	911021_chr_9	ST11	KL47	OL101	Escher_RCS47
NZ_CP022882.1	911021	911021_chr_10	ST11	KL47	OL101	Klebsi_ST437_OXA245phi4.1
NZ_CP022882.1	911021	911021_chr_11	ST11	KL47	OL101	Escher_phiV10
NZ_CP022882.1	911021	911021_chr_12	ST11	KL47	OL101	Escher_phAPEC8
NZ_CP103731.1	913	913_chr_1	ST15	KL24	O1/O2v1	Klebsi_ST15_OXA48phi14.1
NZ_CP103731.1	913	913_chr_2	ST15	KL24	O1/O2v1	Salmon_118970_sal3
NZ_CP103731.1	913	913_chr_3	ST15	KL24	O1/O2v1	Escher_RCS47
NZ_CP103731.1	913	913_chr_4	ST15	KL24	O1/O2v1	Entero_HK225
NZ_CP103731.1	913	913_chr_5	ST15	KL24	O1/O2v1	Klebsi_ST16_OXA48phi5.4
NZ_CP103731.1	913	913_chr_6	ST15	KL24	O1/O2v1	Edward_GF_2
NZ_CP082211.1	A1718	A1718_chr_1	ST15	KL24	O1/O2v1	Salmon_118970_sal3
NZ_CP082211.1	A1718	A1718_chr_2	ST15	KL24	O1/O2v1	Escher_500465_1
NZ_CP014755.1	AATZP	AATZP_chr_1	ST147	KL64	O1/O2v1	Entero_mEp237
NZ_CP014755.1	AATZP	AATZP_chr_2	ST147	KL64	O1/O2v1	Klebsi_ST147_VIM1phi7.1
NZ_CP036442.1	ABFPV	ABFPV_chr_1	ST45	KL24	O1/O2v1	Klebsi_ST16_OXA48phi5.4
NZ_CP036442.1	ABFPV	ABFPV_chr_2	ST45	KL24	O1/O2v1	Escher_HK639
NZ_CP036442.1	ABFPV	ABFPV_chr_3	ST45	KL24	O1/O2v1	Salmon_SPN1S
NZ_CP036442.1	ABFPV	ABFPV_chr_4	ST45	KL24	O1/O2v1	Escher_500465_1
NZ_CP036438.1	ABFQB	ABFQB_chr_1	ST35	KL22	O1/O2v1	Pseudo_PMG1
NZ_CP036438.1	ABFQB	ABFQB_chr_2	ST35	KL22	O1/O2v1	Entero_mEp390
NZ_CP036438.1	ABFQB	ABFQB_chr_3	ST35	KL22	O1/O2v1	Entero_mEp237
NZ_CP036438.1	ABFQB	ABFQB_chr_4	ST35	KL22	O1/O2v1	Escher_500465_1
NZ_CP036438.1	ABFQB	ABFQB_chr_5	ST35	KL22	O1/O2v1	Klebsi_ST16_OXA48phi5.4
NZ_CP086447.1	AE-2247421-T0	AE-2247421-T0_chr_1	ST101	KL17	O1/O2v1	Entero_phiP27
NZ_CP086447.1	AE-2247421-T0	AE-2247421-T0_chr_2	ST101	KL17	O1/O2v1	Escher_500465_1
NZ_CP086447.1	AE-2247421-T0	AE-2247421-T0_chr_3	ST101	KL17	O1/O2v1	Paenib_Yerffej
NZ_CP086447.1	AE-2247421-T0	AE-2247421-T0_chr_4	ST101	KL17	O1/O2v1	Escher_phiV10
NZ_CP086447.1	AE-2247421-T0	AE-2247421-T0_chr_5	ST101	KL17	O1/O2v1	Entero_phi92
NZ_CP086447.1	AE-2247421-T0	AE-2247421-T0_chr_6	ST101	KL17	O1/O2v1	Salmon_118970_sal3
NZ_CP086447.1	AE-2247421-T0	AE-2247421-T0_chr_7	ST101	KL17	O1/O2v1	Klebsi_3LV2017
NZ_CP086447.1	AE-2247421-T0	AE-2247421-T0_chr_8	ST101	KL17	O1/O2v1	Salmon_SJ46
NZ_CP086447.1	AE-2247421-T0	AE-2247421-T0_chr_9	ST101	KL17	O1/O2v1	Erwini_vB_EhrS_59
NZ_CP086447.1	AE-2247421-T0	AE-2247421-T0_chr_10	ST101	KL17	O1/O2v1	Entero_P4
NZ_CP086416.1	AE-2247421-T20-ESBL	AE-2247421-T20-ESBL_chr_1	ST101	KL17	O1/O2v1	Entero_cdtI
NZ_CP086416.1	AE-2247421-T20-ESBL	AE-2247421-T20-ESBL_chr_2	ST101	KL17	O1/O2v1	Escher_500465_1
NZ_CP086416.1	AE-2247421-T20-ESBL	AE-2247421-T20-ESBL_chr_3	ST101	KL17	O1/O2v1	Pseudo_YMC11/02/R656
NZ_CP086416.1	AE-2247421-T20-ESBL	AE-2247421-T20-ESBL_chr_4	ST101	KL17	O1/O2v1	Escher_phiV10
NZ_CP086416.1	AE-2247421-T20-ESBL	AE-2247421-T20-ESBL_chr_5	ST101	KL17	O1/O2v1	Escher_phAPEC8
NZ_CP086416.1	AE-2247421-T20-ESBL	AE-2247421-T20-ESBL_chr_6	ST101	KL17	O1/O2v1	Salmon_118970_sal3
NZ_CP086416.1	AE-2247421-T20-ESBL	AE-2247421-T20-ESBL_chr_7	ST101	KL17	O1/O2v1	Klebsi_3LV2017
NZ_CP086416.1	AE-2247421-T20-ESBL	AE-2247421-T20-ESBL_chr_8	ST101	KL17	O1/O2v1	Entero_HK022
NZ_CP086416.1	AE-2247421-T20-ESBL	AE-2247421-T20-ESBL_chr_9	ST101	KL17	O1/O2v1	Erwini_vB_EhrS_59
NZ_CP086423.1	AE-2247421-T20-MAC	AE-2247421-T20-MAC_chr_1	ST101	KL17	O1/O2v1	Entero_cdtI
NZ_CP086423.1	AE-2247421-T20-MAC	AE-2247421-T20-MAC_chr_3	ST101	KL17	O1/O2v1	Escher_500465_1
NZ_CP086423.1	AE-2247421-T20-MAC	AE-2247421-T20-MAC_chr_4	ST101	KL17	O1/O2v1	Entero_phiT5282H
NZ_CP086423.1	AE-2247421-T20-MAC	AE-2247421-T20-MAC_chr_5	ST101	KL17	O1/O2v1	Escher_phiV10
NZ_CP086423.1	AE-2247421-T20-MAC	AE-2247421-T20-MAC_chr_6	ST101	KL17	O1/O2v1	Escher_phAPEC8
NZ_CP086423.1	AE-2247421-T20-MAC	AE-2247421-T20-MAC_chr_7	ST101	KL17	O1/O2v1	Salmon_118970_sal3
NZ_CP086423.1	AE-2247421-T20-MAC	AE-2247421-T20-MAC_chr_8	ST101	KL17	O1/O2v1	Klebsi_3LV2017
NZ_CP086423.1	AE-2247421-T20-MAC	AE-2247421-T20-MAC_chr_9	ST101	KL17	O1/O2v1	Klebsi_ST437_OXA245phi4.1
NZ_CP086423.1	AE-2247421-T20-MAC	AE-2247421-T20-MAC_chr_10	ST101	KL17	O1/O2v1	Erwini_vB_EhrS_59
NZ_CP086431.1	AE-2247421-T5-ESBL	AE-2247421-T5-ESBL_chr_1	ST101	KL17	O1/O2v1	Entero_cdtI
NZ_CP086431.1	AE-2247421-T5-ESBL	AE-2247421-T5-ESBL_chr_2	ST101	KL17	O1/O2v1	Escher_500465_1
NZ_CP086431.1	AE-2247421-T5-ESBL	AE-2247421-T5-ESBL_chr_3	ST101	KL17	O1/O2v1	Entero_phiP27
NZ_CP086431.1	AE-2247421-T5-ESBL	AE-2247421-T5-ESBL_chr_4	ST101	KL17	O1/O2v1	Escher_phiV10
NZ_CP086431.1	AE-2247421-T5-ESBL	AE-2247421-T5-ESBL_chr_5	ST101	KL17	O1/O2v1	Entero_phi92
NZ_CP086431.1	AE-2247421-T5-ESBL	AE-2247421-T5-ESBL_chr_6	ST101	KL17	O1/O2v1	Salmon_118970_sal3
NZ_CP086431.1	AE-2247421-T5-ESBL	AE-2247421-T5-ESBL_chr_7	ST101	KL17	O1/O2v1	Klebsi_3LV2017
NZ_CP086431.1	AE-2247421-T5-ESBL	AE-2247421-T5-ESBL_chr_8	ST101	KL17	O1/O2v1	Entero_HK022
NZ_CP086431.1	AE-2247421-T5-ESBL	AE-2247421-T5-ESBL_chr_9	ST101	KL17	O1/O2v1	Erwini_vB_EhrS_59
NZ_CP086439.1	AE-2247421-T5-MAC	AE-2247421-T5-MAC_chr_1	ST101	KL17	O1/O2v1	Entero_cdtI
NZ_CP086439.1	AE-2247421-T5-MAC	AE-2247421-T5-MAC_chr_2	ST101	KL17	O1/O2v1	Escher_500465_1
NZ_CP086439.1	AE-2247421-T5-MAC	AE-2247421-T5-MAC_chr_3	ST101	KL17	O1/O2v1	Entero_phiP27
NZ_CP086439.1	AE-2247421-T5-MAC	AE-2247421-T5-MAC_chr_4	ST101	KL17	O1/O2v1	Escher_phiV10
NZ_CP086439.1	AE-2247421-T5-MAC	AE-2247421-T5-MAC_chr_5	ST101	KL17	O1/O2v1	Escher_phAPEC8
NZ_CP086439.1	AE-2247421-T5-MAC	AE-2247421-T5-MAC_chr_6	ST101	KL17	O1/O2v1	Salmon_118970_sal3
NZ_CP086439.1	AE-2247421-T5-MAC	AE-2247421-T5-MAC_chr_7	ST101	KL17	O1/O2v1	Klebsi_3LV2017
NZ_CP086439.1	AE-2247421-T5-MAC	AE-2247421-T5-MAC_chr_8	ST101	KL17	O1/O2v1	Synech_S_SM2
NZ_CP086439.1	AE-2247421-T5-MAC	AE-2247421-T5-MAC_chr_9	ST101	KL17	O1/O2v1	Erwini_vB_EhrS_59
NZ_CP091048.1	AHSWKP25	AHSWKP25_chr_1	ST464	KL53	O1/O2v1	Escher_500465_1
NZ_CP091048.1	AHSWKP25	AHSWKP25_chr_2	ST464	KL53	O1/O2v1	Entero_P4
NZ_CP091048.1	AHSWKP25	AHSWKP25_chr_4	ST464	KL53	O1/O2v1	Escher_HK639
NZ_LR130541.1	AJ218	AJ218_chr_1_1	ST2121	KL113	O1/O2v2	Escher_500465_1
NZ_LR130541.1	AJ218	AJ218_chr_1_2	ST2121	KL113	O1/O2v2	Salmon_118970_sal3
NZ_LR130541.1	AJ218	AJ218_chr_1_3	ST2121	KL113	O1/O2v2	Entero_cdtI
NZ_LR130541.1	AJ218	AJ218_chr_1_4	ST2121	KL113	O1/O2v2	Salmon_118970_sal3
NZ_LR130541.1	AJ218	AJ218_chr_1_5	ST2121	KL113	O1/O2v2	Entero_mEp237
NZ_LR130541.1	AJ218	AJ218_chr_1_6	ST2121	KL113	O1/O2v2	Escher_503458
NZ_CP035383.1	AP8555	AP8555_chr_1	ST23	KL1	O1/O2v2	Escher_500465_1
NZ_CP035383.1	AP8555	AP8555_chr_2	ST23	KL1	O1/O2v2	Salmon_SPN1S
NZ_CP035383.1	AP8555	AP8555_chr_3	ST23	KL1	O1/O2v2	Mycoba_Equemioh13
NZ_CP035383.1	AP8555	AP8555_chr_4	ST23	KL1	O1/O2v2	Klebsi_phiKO2
NZ_CP039954.1	AR142_2b	AR142_2b_chr_1	ST307	KL102	O1/O2v2	Pseudo_D3
NZ_CP039954.1	AR142_2b	AR142_2b_chr_3	ST307	KL102	O1/O2v2	Escher_500465_1
NZ_CP039954.1	AR142_2b	AR142_2b_chr_4	ST307	KL102	O1/O2v2	Salmon_118970_sal3
NZ_CP039954.1	AR142_2b	AR142_2b_chr_5	ST307	KL102	O1/O2v2	Erwini_vB_EhrS_59
NZ_CP039954.1	AR142_2b	AR142_2b_chr_6	ST307	KL102	O1/O2v2	Salmon_SEN34
NZ_CP029137.1	AR376	AR376_chr_1	ST15	KL112	O1/O2v1	Klebsi_ST16_OXA48phi5.4
NZ_CP029137.1	AR376	AR376_chr_2	ST15	KL112	O1/O2v1	Phage_Gifsy_2
NZ_CP029137.1	AR376	AR376_chr_3	ST15	KL112	O1/O2v1	Klebsi_ST15_OXA48phi14.1
NZ_CP029099.1	AR438	AR438_chr_1	ST512	KL107	O1/O2v2	Shigel_SfIV
NZ_CP029099.1	AR438	AR438_chr_2	ST512	KL107	O1/O2v2	Klebsi_ST437_OXA245phi4.1
NZ_CP029099.1	AR438	AR438_chr_3	ST512	KL107	O1/O2v2	Escher_phiV10
NZ_CP029099.1	AR438	AR438_chr_4	ST512	KL107	O1/O2v2	Microc_MaMV_DC
NZ_CP029099.1	AR438	AR438_chr_5	ST512	KL107	O1/O2v2	Salmon_SEN34
NZ_CP029099.1	AR438	AR438_chr_6	ST512	KL107	O1/O2v2	Cronob_ENT39118
NZ_CP029099.1	AR438	AR438_chr_7	ST512	KL107	O1/O2v2	Escher_HK639
NZ_CP029099.1	AR438	AR438_chr_8	ST512	KL107	O1/O2v2	Klebsi_ST512_KPC3phi13.2
NZ_CP029099.1	AR438	AR438_chr_9	ST512	KL107	O1/O2v2	Erwini_vB_EhrS_59
NZ_CP029099.1	AR438	AR438_chr_10	ST512	KL107	O1/O2v2	Entero_P4
NZ_CP029099.1	AR438	AR438_chr_11	ST512	KL107	O1/O2v2	Entero_P4
NZ_CP081816.1	AR8416	AR8416_chr_1	ST5214	KL1	O1/O2v2	Acinet_YMC11/11/R3177
NZ_CP081816.1	AR8416	AR8416_chr_2	ST5214	KL1	O1/O2v2	Klebsi_ST13_OXA48phi12.1
NZ_CP081816.1	AR8416	AR8416_chr_3	ST5214	KL1	O1/O2v2	Klebsi_ST437_OXA245phi4.1
NZ_CP033946.1	ARLG-3135	ARLG-3135_chr_1	ST231	KL51	O1/O2v2	Entero_P4
NZ_CP033946.1	ARLG-3135	ARLG-3135_chr_2	ST231	KL51	O1/O2v2	Escher_500465_1
NZ_CP033946.1	ARLG-3135	ARLG-3135_chr_3	ST231	KL51	O1/O2v2	Entero_933W
NZ_CP033946.1	ARLG-3135	ARLG-3135_chr_4	ST231	KL51	O1/O2v2	Entero_c_1
NZ_CP033946.1	ARLG-3135	ARLG-3135_chr_5	ST231	KL51	O1/O2v2	Salmon_SEN8
NZ_CP033946.1	ARLG-3135	ARLG-3135_chr_6	ST231	KL51	O1/O2v2	Entero_P4
NZ_CP032222.1	AR_0046	AR_0046_chr_1	ST147	KL64	O1/O2v1	Entero_mEp235
NZ_CP032222.1	AR_0046	AR_0046_chr_2	ST147	KL64	O1/O2v1	Salmon_118970_sal3
NZ_CP032222.1	AR_0046	AR_0046_chr_3	ST147	KL64	O1/O2v1	Escher_vB_EcoM_Schickermooser
NZ_CP032222.1	AR_0046	AR_0046_chr_4	ST147	KL64	O1/O2v1	Escher_500465_1
NZ_CP032222.1	AR_0046	AR_0046_chr_5	ST147	KL64	O1/O2v1	Klebsi_ST147_VIM1phi7.1
NZ_CP032222.1	AR_0046	AR_0046_chr_6	ST147	KL64	O1/O2v1	Bacill_vB_BtS_BMBtp14
NZ_CP021539.1	AR_0047	AR_0047_chr_1	ST258	KL107	O1/O2v2	Entero_P4
NZ_CP021539.1	AR_0047	AR_0047_chr_2	ST258	KL107	O1/O2v2	Entero_P4
NZ_CP021539.1	AR_0047	AR_0047_chr_3	ST258	KL107	O1/O2v2	Erwini_vB_EhrS_59
NZ_CP021539.1	AR_0047	AR_0047_chr_4	ST258	KL107	O1/O2v2	Klebsi_ST512_KPC3phi13.2
NZ_CP021539.1	AR_0047	AR_0047_chr_5	ST258	KL107	O1/O2v2	Escher_HK639
NZ_CP021539.1	AR_0047	AR_0047_chr_6	ST258	KL107	O1/O2v2	Salmon_vB_SosS_Oslo
NZ_CP021539.1	AR_0047	AR_0047_chr_7	ST258	KL107	O1/O2v2	Salmon_SEN34
NZ_CP021539.1	AR_0047	AR_0047_chr_8	ST258	KL107	O1/O2v2	Escher_RCS47
NZ_CP021539.1	AR_0047	AR_0047_chr_9	ST258	KL107	O1/O2v2	Escher_RCS47
NZ_CP021539.1	AR_0047	AR_0047_chr_10	ST258	KL107	O1/O2v2	Microc_MaMV_DC
NZ_CP021539.1	AR_0047	AR_0047_chr_11	ST258	KL107	O1/O2v2	Klebsi_ST437_OXA245phi4.1
NZ_CP021539.1	AR_0047	AR_0047_chr_12	ST258	KL107	O1/O2v2	Shigel_SfIV
NZ_CP018816.1	AR_0049	AR_0049_chr_1	ST11	KL74	O3b	Entero_P4
NZ_CP018816.1	AR_0049	AR_0049_chr_2	ST11	KL74	O3b	Entero_SfI
NZ_CP018816.1	AR_0049	AR_0049_chr_3	ST11	KL74	O3b	Klebsi_ST437_OXA245phi4.1
NZ_CP018816.1	AR_0049	AR_0049_chr_4	ST11	KL74	O3b	Escher_phiV10
NZ_CP018816.1	AR_0049	AR_0049_chr_5	ST11	KL74	O3b	Stx2_c_Stx2a_F451
NZ_CP018816.1	AR_0049	AR_0049_chr_6	ST11	KL74	O3b	Stx2_c_Stx2a_F451
NZ_CP018816.1	AR_0049	AR_0049_chr_7	ST11	KL74	O3b	Shigel_SfIV
NZ_CP018816.1	AR_0049	AR_0049_chr_8	ST11	KL74	O3b	Salmon_SEN34
NZ_CP018816.1	AR_0049	AR_0049_chr_9	ST11	KL74	O3b	Bacill_SPbeta
NZ_CP018816.1	AR_0049	AR_0049_chr_10	ST11	KL74	O3b	Escher_HK639
NZ_CP018816.1	AR_0049	AR_0049_chr_11	ST11	KL74	O3b	Klebsi_ST512_KPC3phi13.2
NZ_CP018816.1	AR_0049	AR_0049_chr_12	ST11	KL74	O3b	Erwini_vB_EhrS_59
NZ_CP026751.1	AR_0066	AR_0066_chr_1	ST14	KL2	O1/O2v1	Klebsi_ST16_OXA48phi5.4
NZ_CP026751.1	AR_0066	AR_0066_chr_2	ST14	KL2	O1/O2v1	Klebsi_ST13_OXA48phi12.1
NZ_CP026751.1	AR_0066	AR_0066_chr_4	ST14	KL2	O1/O2v1	Escher_HK639
NZ_CP026751.1	AR_0066	AR_0066_chr_5	ST14	KL2	O1/O2v1	Entero_phiP27
NZ_CP026751.1	AR_0066	AR_0066_chr_6	ST14	KL2	O1/O2v1	Entero_HK140
NZ_CP026751.1	AR_0066	AR_0066_chr_7	ST14	KL2	O1/O2v1	Erwini_vB_EhrS_59
NZ_CP020067.1	AR_0068	AR_0068_chr_1	ST14	KL2	O1/O2v1	Klebsi_ST16_OXA48phi5.4
NZ_CP020067.1	AR_0068	AR_0068_chr_2	ST14	KL2	O1/O2v1	Escher_500465_1
NZ_CP020067.1	AR_0068	AR_0068_chr_4	ST14	KL2	O1/O2v1	Escher_HK639
NZ_CP020067.1	AR_0068	AR_0068_chr_5	ST14	KL2	O1/O2v1	Entero_phiP27
NZ_CP020067.1	AR_0068	AR_0068_chr_6	ST14	KL2	O1/O2v1	Erwini_vB_EhrS_59
NZ_CP020067.1	AR_0068	AR_0068_chr_7	ST14	KL2	O1/O2v1	Salmon_118970_sal3
NZ_CP032185.1	AR_0075	AR_0075_chr_1	ST16	KL51	O3b	Erwini_vB_EhrS_59
NZ_CP032185.1	AR_0075	AR_0075_chr_2	ST16	KL51	O3b	Klebsi_ST16_OXA48phi5.4
NZ_CP032185.1	AR_0075	AR_0075_chr_3	ST16	KL51	O3b	Entero_HK140
NZ_CP032185.1	AR_0075	AR_0075_chr_4	ST16	KL51	O3b	Salmon_SEN34
NZ_CP032185.1	AR_0075	AR_0075_chr_5	ST16	KL51	O3b	Salmon_118970_sal3
NZ_CP032185.1	AR_0075	AR_0075_chr_6	ST16	KL51	O3b	Escher_500465_1
NZ_CP032167.1	AR_0076	AR_0076_chr_1	ST2938	KL107	O5	Klebsi_ST13_OXA48phi12.1
NZ_CP032167.1	AR_0076	AR_0076_chr_2	ST2938	KL107	O5	Escher_500465_1
NZ_CP032167.1	AR_0076	AR_0076_chr_3	ST2938	KL107	O5	Salmon_118970_sal3
NZ_CP032167.1	AR_0076	AR_0076_chr_4	ST2938	KL107	O5	Edward_GF_2
NZ_CP032167.1	AR_0076	AR_0076_chr_5	ST2938	KL107	O5	Entero_mEp237
NZ_CP032167.1	AR_0076	AR_0076_chr_6	ST2938	KL107	O5	Entero_P4
NZ_CP028994.1	AR_0079	AR_0079_chr_1	ST11	KL64	O1/O2v1	Salmon_ST64B
NZ_CP028994.1	AR_0079	AR_0079_chr_2	ST11	KL64	O1/O2v1	Entero_P4
NZ_CP028994.1	AR_0079	AR_0079_chr_3	ST11	KL64	O1/O2v1	Entero_P4
NZ_CP028994.1	AR_0079	AR_0079_chr_4	ST11	KL64	O1/O2v1	Erwini_vB_EhrS_59
NZ_CP028994.1	AR_0079	AR_0079_chr_5	ST11	KL64	O1/O2v1	Klebsi_ST512_KPC3phi13.2
NZ_CP028994.1	AR_0079	AR_0079_chr_6	ST11	KL64	O1/O2v1	Salmon_SEN34
NZ_CP028994.1	AR_0079	AR_0079_chr_7	ST11	KL64	O1/O2v1	Escher_phAPEC8
NZ_CP028994.1	AR_0079	AR_0079_chr_8	ST11	KL64	O1/O2v1	Salmon_SEN34
NZ_CP028994.1	AR_0079	AR_0079_chr_9	ST11	KL64	O1/O2v1	Escher_phiV10
NZ_CP028994.1	AR_0079	AR_0079_chr_10	ST11	KL64	O1/O2v1	Klebsi_ST147_VIM1phi7.1
NZ_CP028994.1	AR_0079	AR_0079_chr_11	ST11	KL64	O1/O2v1	Klebsi_ST437_OXA245phi4.1
NZ_CP029738.1	AR_0087	AR_0087_chr_1	ST16	KL149	O4	Entero_HK140
NZ_CP029738.1	AR_0087	AR_0087_chr_2	ST16	KL149	O4	Klebsi_ST16_OXA48phi5.4
NZ_CP029738.1	AR_0087	AR_0087_chr_3	ST16	KL149	O4	Erwini_vB_EhrS_59
NZ_CP029738.1	AR_0087	AR_0087_chr_4	ST16	KL149	O4	Escher_RCS47
NZ_CP029738.1	AR_0087	AR_0087_chr_5	ST16	KL149	O4	Escher_500465_1
NZ_CP029738.1	AR_0087	AR_0087_chr_6	ST16	KL149	O4	Salmon_SEN34
NZ_CP027612.1	AR_0096	AR_0096_chr_1	ST2167	KL10	O3/O3a	Entero_mEp235
NZ_CP027612.1	AR_0096	AR_0096_chr_3	ST2167	KL10	O3/O3a	Salmon_SPN1S
NZ_CP027612.1	AR_0096	AR_0096_chr_4	ST2167	KL10	O3/O3a	Escher_500465_1
NZ_CP027612.1	AR_0096	AR_0096_chr_5	ST2167	KL10	O3/O3a	Salmon_118970_sal3
NZ_CP027612.1	AR_0096	AR_0096_chr_6	ST2167	KL10	O3/O3a	Entero_HK140
NZ_CP032200.1	AR_0097	AR_0097_chr_1	ST3603	KL10	O3/O3a	Escher_500465_1
NZ_CP032200.1	AR_0097	AR_0097_chr_2	ST3603	KL10	O3/O3a	Salmon_SPN1S
NZ_CP032200.1	AR_0097	AR_0097_chr_4	ST3603	KL10	O3/O3a	Entero_mEp235
NZ_CP032200.1	AR_0097	AR_0097_chr_5	ST3603	KL10	O3/O3a	Entero_HK022
NZ_CP032200.1	AR_0097	AR_0097_chr_6	ST3603	KL10	O3/O3a	Salmon_118970_sal3
NZ_CP020108.1	AR_0098	AR_0098_chr_1	ST258	KL106	O1/O2v2	Salmon_SEN34
NZ_CP020108.1	AR_0098	AR_0098_chr_2	ST258	KL106	O1/O2v2	Escher_RCS47
NZ_CP020108.1	AR_0098	AR_0098_chr_4	ST258	KL106	O1/O2v2	Escher_HK639
NZ_CP020108.1	AR_0098	AR_0098_chr_5	ST258	KL106	O1/O2v2	Pectob_ZF40
NZ_CP020108.1	AR_0098	AR_0098_chr_6	ST258	KL106	O1/O2v2	Klebsi_ST512_KPC3phi13.2
NZ_CP020108.1	AR_0098	AR_0098_chr_7	ST258	KL106	O1/O2v2	Erwini_vB_EhrS_59
NZ_CP020108.1	AR_0098	AR_0098_chr_8	ST258	KL106	O1/O2v2	Entero_P4
NZ_CP020108.1	AR_0098	AR_0098_chr_9	ST258	KL106	O1/O2v2	Entero_P4
NZ_CP020108.1	AR_0098	AR_0098_chr_10	ST258	KL106	O1/O2v2	Entero_SfI
NZ_CP020108.1	AR_0098	AR_0098_chr_11	ST258	KL106	O1/O2v2	Escher_500465_1
NZ_CP020108.1	AR_0098	AR_0098_chr_12	ST258	KL106	O1/O2v2	Microc_MaMV_DC
NZ_CP021955.1	AR_0107	AR_0107_chr_1	ST1161	KL19	O1/O2v2	Edward_GF_2
NZ_CP021955.1	AR_0107	AR_0107_chr_2	ST1161	KL19	O1/O2v2	Klebsi_4LV2017
NZ_CP021955.1	AR_0107	AR_0107_chr_3	ST1161	KL19	O1/O2v2	Pectob_ZF40
NZ_CP021955.1	AR_0107	AR_0107_chr_4	ST1161	KL19	O1/O2v2	Klebsi_phiKO2
NZ_CP021955.1	AR_0107	AR_0107_chr_5	ST1161	KL19	O1/O2v2	Erwini_phiEt88
NZ_CP021955.1	AR_0107	AR_0107_chr_6	ST1161	KL19	O1/O2v2	Edward_GF_2
NZ_CP021955.1	AR_0107	AR_0107_chr_7	ST1161	KL19	O1/O2v2	Entero_N15
NZ_CP021955.1	AR_0107	AR_0107_chr_8	ST1161	KL19	O1/O2v2	Salmon_SPN1S
NZ_CP021955.1	AR_0107	AR_0107_chr_9	ST1161	KL19	O1/O2v2	Escher_500465_1
NZ_CP021955.1	AR_0107	AR_0107_chr_10	ST1161	KL19	O1/O2v2	Burkho_BcepMu
NZ_CP021955.1	AR_0107	AR_0107_chr_11	ST1161	KL19	O1/O2v2	Klebsi_ST147_VIM1phi7.1
NZ_CP032207.1	AR_0109	AR_0109_chr_1	ST340	KL15	O4	Escher_500465_1
NZ_CP032207.1	AR_0109	AR_0109_chr_2	ST340	KL15	O4	Entero_SfI
NZ_CP032207.1	AR_0109	AR_0109_chr_3	ST340	KL15	O4	Entero_P4
NZ_CP032207.1	AR_0109	AR_0109_chr_4	ST340	KL15	O4	Entero_P4
NZ_CP032207.1	AR_0109	AR_0109_chr_5	ST340	KL15	O4	Klebsi_ST512_KPC3phi13.2
NZ_CP032207.1	AR_0109	AR_0109_chr_6	ST340	KL15	O4	Cronob_ENT39118
NZ_CP032207.1	AR_0109	AR_0109_chr_7	ST340	KL15	O4	Salmon_SEN34
NZ_CP021549.1	AR_0112	AR_0112_chr_1	ST258	KL107	O1/O2v2	Entero_P4
NZ_CP021549.1	AR_0112	AR_0112_chr_2	ST258	KL107	O1/O2v2	Entero_P4
NZ_CP021549.1	AR_0112	AR_0112_chr_3	ST258	KL107	O1/O2v2	Erwini_vB_EhrS_59
NZ_CP021549.1	AR_0112	AR_0112_chr_4	ST258	KL107	O1/O2v2	Klebsi_ST512_KPC3phi13.2
NZ_CP021549.1	AR_0112	AR_0112_chr_5	ST258	KL107	O1/O2v2	Escher_HK639
NZ_CP021549.1	AR_0112	AR_0112_chr_6	ST258	KL107	O1/O2v2	Salmon_SEN34
NZ_CP021549.1	AR_0112	AR_0112_chr_7	ST258	KL107	O1/O2v2	Escher_RCS47
NZ_CP021549.1	AR_0112	AR_0112_chr_8	ST258	KL107	O1/O2v2	Klebsi_ST437_OXA245phi4.1
NZ_CP021549.1	AR_0112	AR_0112_chr_9	ST258	KL107	O1/O2v2	Salmon_ST64B
NZ_CP021751.1	AR_0113	AR_0113_chr_1	ST258	KL107	O1/O2v2	Bacill_vB_BtS_BMBtp14
NZ_CP021751.1	AR_0113	AR_0113_chr_2	ST258	KL107	O1/O2v2	Entero_P4
NZ_CP021751.1	AR_0113	AR_0113_chr_3	ST258	KL107	O1/O2v2	Erwini_vB_EhrS_59
NZ_CP021751.1	AR_0113	AR_0113_chr_4	ST258	KL107	O1/O2v2	Klebsi_ST512_KPC3phi13.2
NZ_CP021751.1	AR_0113	AR_0113_chr_5	ST258	KL107	O1/O2v2	Escher_HK639
NZ_CP021751.1	AR_0113	AR_0113_chr_6	ST258	KL107	O1/O2v2	Salmon_SEN34
NZ_CP021751.1	AR_0113	AR_0113_chr_7	ST258	KL107	O1/O2v2	Microc_Ma_LMM01
NZ_CP021751.1	AR_0113	AR_0113_chr_8	ST258	KL107	O1/O2v2	Klebsi_ST437_OXA245phi4.1
NZ_CP021751.1	AR_0113	AR_0113_chr_9	ST258	KL107	O1/O2v2	Salmon_118970_sal3
NZ_CP020071.1	AR_0115	AR_0115_chr_1	ST258	KL107	O1/O2v2	Klebsi_ST437_OXA245phi4.1
NZ_CP020071.1	AR_0115	AR_0115_chr_2	ST258	KL107	O1/O2v2	Salmon_ST64B
NZ_CP020071.1	AR_0115	AR_0115_chr_3	ST258	KL107	O1/O2v2	Entero_P4
NZ_CP020071.1	AR_0115	AR_0115_chr_4	ST258	KL107	O1/O2v2	Entero_P4
NZ_CP020071.1	AR_0115	AR_0115_chr_5	ST258	KL107	O1/O2v2	Erwini_vB_EhrS_59
NZ_CP020071.1	AR_0115	AR_0115_chr_6	ST258	KL107	O1/O2v2	Klebsi_ST512_KPC3phi13.2
NZ_CP020071.1	AR_0115	AR_0115_chr_7	ST258	KL107	O1/O2v2	Escher_HK639
NZ_CP020071.1	AR_0115	AR_0115_chr_8	ST258	KL107	O1/O2v2	Salmon_vB_SosS_Oslo
NZ_CP020071.1	AR_0115	AR_0115_chr_9	ST258	KL107	O1/O2v2	Salmon_SEN34
NZ_CP020071.1	AR_0115	AR_0115_chr_10	ST258	KL107	O1/O2v2	Escher_RCS47
NZ_CP020061.1	AR_0117	AR_0117_chr_1	ST234	KL30	O1/O2v2	Escher_500465_1
NZ_CP020061.1	AR_0117	AR_0117_chr_2	ST234	KL30	O1/O2v2	Escher_HK75
NZ_CP020061.1	AR_0117	AR_0117_chr_3	ST234	KL30	O1/O2v2	Mycoba_Larenn
NZ_CP020061.1	AR_0117	AR_0117_chr_4	ST234	KL30	O1/O2v2	Escher_RCS47
NZ_CP020061.1	AR_0117	AR_0117_chr_5	ST234	KL30	O1/O2v2	Klebsi_phiKO2
NZ_CP021833.1	AR_0120	AR_0120_chr_1	ST258	KL107	O1/O2v2	Klebsi_ST512_KPC3phi13.2
NZ_CP021833.1	AR_0120	AR_0120_chr_2	ST258	KL107	O1/O2v2	Salmon_SEN34
NZ_CP021833.1	AR_0120	AR_0120_chr_3	ST258	KL107	O1/O2v2	Escher_RCS47
NZ_CP021833.1	AR_0120	AR_0120_chr_4	ST258	KL107	O1/O2v2	Escher_RCS47
NZ_CP021833.1	AR_0120	AR_0120_chr_5	ST258	KL107	O1/O2v2	Escher_phiV10
NZ_CP021833.1	AR_0120	AR_0120_chr_6	ST258	KL107	O1/O2v2	Klebsi_ST437_OXA245phi4.1
NZ_CP021833.1	AR_0120	AR_0120_chr_7	ST258	KL107	O1/O2v2	Entero_SfI
NZ_CP021833.1	AR_0120	AR_0120_chr_8	ST258	KL107	O1/O2v2	Entero_P4
NZ_CP021833.1	AR_0120	AR_0120_chr_9	ST258	KL107	O1/O2v2	Entero_P4
NZ_CP021833.1	AR_0120	AR_0120_chr_10	ST258	KL107	O1/O2v2	Erwini_vB_EhrS_59
NZ_CP021859.1	AR_0125	AR_0125_chr_1	ST258	KL107	O1/O2v2	Salmon_SEN34
NZ_CP021859.1	AR_0125	AR_0125_chr_2	ST258	KL107	O1/O2v2	Escher_phiV10
NZ_CP021859.1	AR_0125	AR_0125_chr_3	ST258	KL107	O1/O2v2	Klebsi_ST437_OXA245phi4.1
NZ_CP021859.1	AR_0125	AR_0125_chr_4	ST258	KL107	O1/O2v2	Entero_SfI
NZ_CP021859.1	AR_0125	AR_0125_chr_5	ST258	KL107	O1/O2v2	Entero_P4
NZ_CP021859.1	AR_0125	AR_0125_chr_6	ST258	KL107	O1/O2v2	Entero_P4
NZ_CP021859.1	AR_0125	AR_0125_chr_7	ST258	KL107	O1/O2v2	Klebsi_ST512_KPC3phi13.2
NZ_CP021740.1	AR_0126	AR_0126_chr_1	ST45	KL25	O1/O2v1	Klebsi_3LV2017
NZ_CP021740.1	AR_0126	AR_0126_chr_2	ST45	KL25	O1/O2v1	Klebsi_ST16_OXA48phi5.4
NZ_CP021740.1	AR_0126	AR_0126_chr_3	ST45	KL25	O1/O2v1	Entero_P1
NZ_CP021740.1	AR_0126	AR_0126_chr_4	ST45	KL25	O1/O2v1	Pectob_ZF40
NZ_CP021740.1	AR_0126	AR_0126_chr_5	ST45	KL25	O1/O2v1	Salmon_118970_sal3
NZ_CP021740.1	AR_0126	AR_0126_chr_6	ST45	KL25	O1/O2v1	Salmon_118970_sal3
NZ_CP021740.1	AR_0126	AR_0126_chr_7	ST45	KL25	O1/O2v1	Klebsi_ST147_VIM1phi7.1
NZ_CP021740.1	AR_0126	AR_0126_chr_8	ST45	KL25	O1/O2v1	Entero_186
NZ_CP021718.1	AR_0129	AR_0129_chr_1	ST258	KL107	O1/O2v2	Erwini_vB_EhrS_59
NZ_CP021718.1	AR_0129	AR_0129_chr_2	ST258	KL107	O1/O2v2	Klebsi_ST512_KPC3phi13.2
NZ_CP021718.1	AR_0129	AR_0129_chr_3	ST258	KL107	O1/O2v2	Klebsi_phiKO2
NZ_CP021718.1	AR_0129	AR_0129_chr_4	ST258	KL107	O1/O2v2	Escher_RCS47
NZ_CP021718.1	AR_0129	AR_0129_chr_5	ST258	KL107	O1/O2v2	Escher_phiV10
NZ_CP021718.1	AR_0129	AR_0129_chr_6	ST258	KL107	O1/O2v2	Microc_MaMV_DC
NZ_CP021718.1	AR_0129	AR_0129_chr_7	ST258	KL107	O1/O2v2	Escher_phiV10
NZ_CP021718.1	AR_0129	AR_0129_chr_8	ST258	KL107	O1/O2v2	Klebsi_ST437_OXA245phi4.1
NZ_CP021718.1	AR_0129	AR_0129_chr_9	ST258	KL107	O1/O2v2	Salmon_ST64B
NZ_CP021718.1	AR_0129	AR_0129_chr_10	ST258	KL107	O1/O2v2	Entero_P4
NZ_CP021718.1	AR_0129	AR_0129_chr_11	ST258	KL107	O1/O2v2	Entero_P4
NZ_CP021718.1	AR_0129	AR_0129_chr_12	ST258	KL107	O1/O2v2	Erwini_vB_EhrS_49
NZ_CP032178.1	AR_0135	AR_0135_chr_1	ST101	KL17	O1/O2v1	Escher_phiV10
NZ_CP032178.1	AR_0135	AR_0135_chr_2	ST101	KL17	O1/O2v1	Entero_phiP27
NZ_CP032178.1	AR_0135	AR_0135_chr_3	ST101	KL17	O1/O2v1	Escher_500465_1
NZ_CP032178.1	AR_0135	AR_0135_chr_4	ST101	KL17	O1/O2v1	Entero_P4
NZ_CP032178.1	AR_0135	AR_0135_chr_5	ST101	KL17	O1/O2v1	Erwini_vB_EhrS_59
NZ_CP032178.1	AR_0135	AR_0135_chr_6	ST101	KL17	O1/O2v1	Escher_RCS47
NZ_CP032178.1	AR_0135	AR_0135_chr_8	ST101	KL17	O1/O2v1	Salmon_118970_sal3
NZ_CP021757.1	AR_0138	AR_0138_chr_1	ST147	KL64	O1/O2v1	Entero_mEp237
NZ_CP021757.1	AR_0138	AR_0138_chr_2	ST147	KL64	O1/O2v1	Entero_I2_2
NZ_CP021757.1	AR_0138	AR_0138_chr_3	ST147	KL64	O1/O2v1	Salmon_118970_sal3
NZ_CP021757.1	AR_0138	AR_0138_chr_4	ST147	KL64	O1/O2v1	Entero_c_1
NZ_CP021757.1	AR_0138	AR_0138_chr_5	ST147	KL64	O1/O2v1	Klebsi_ST147_VIM1phi7.1
NZ_CP021960.1	AR_0139	AR_0139_chr_1	ST37	KL105	O1/O2v2	Salmon_118970_sal3
NZ_CP021960.1	AR_0139	AR_0139_chr_2	ST37	KL105	O1/O2v2	Escher_500465_1
NZ_CP021960.1	AR_0139	AR_0139_chr_3	ST37	KL105	O1/O2v2	Salmon_SEN34
NZ_CP021960.1	AR_0139	AR_0139_chr_4	ST37	KL105	O1/O2v2	Escher_RCS47
NZ_CP021960.1	AR_0139	AR_0139_chr_5	ST37	KL105	O1/O2v2	Pectob_ZF40
NZ_CP021960.1	AR_0139	AR_0139_chr_6	ST37	KL105	O1/O2v2	Salmon_SEN34
NZ_CP021960.1	AR_0139	AR_0139_chr_7	ST37	KL105	O1/O2v2	Klebsi_3LV2017
NZ_CP029722.1	AR_0140	AR_0140_chr_1	ST34	KL57	O1/O2v2	Entero_P1
NZ_CP029722.1	AR_0140	AR_0140_chr_2	ST34	KL57	O1/O2v2	Klebsi_ST16_OXA48phi5.4
NZ_CP029722.1	AR_0140	AR_0140_chr_3	ST34	KL57	O1/O2v2	Entero_SfI
NZ_CP029722.1	AR_0140	AR_0140_chr_4	ST34	KL57	O1/O2v2	Escher_500465_1
NZ_CP029722.1	AR_0140	AR_0140_chr_5	ST34	KL57	O1/O2v2	Klebsi_ST437_OXA245phi4.1
NZ_CP029722.1	AR_0140	AR_0140_chr_6	ST34	KL57	O1/O2v2	Vibrio_12B12
NZ_CP028953.1	AR_0141	AR_0141_chr_1	ST34	KL57	O1/O2v2	Vibrio_12B12
NZ_CP028953.1	AR_0141	AR_0141_chr_2	ST34	KL57	O1/O2v2	Entero_P1
NZ_CP028953.1	AR_0141	AR_0141_chr_3	ST34	KL57	O1/O2v2	Klebsi_ST16_OXA48phi5.4
NZ_CP028953.1	AR_0141	AR_0141_chr_4	ST34	KL57	O1/O2v2	Salmon_118970_sal3
NZ_CP028953.1	AR_0141	AR_0141_chr_6	ST34	KL57	O1/O2v2	Escher_500465_1
NZ_CP028990.1	AR_0142	AR_0142_chr_1	ST34	KL57	O1/O2v2	Escher_500465_1
NZ_CP028990.1	AR_0142	AR_0142_chr_2	ST34	KL57	O1/O2v2	Vibrio_12B12
NZ_CP028990.1	AR_0142	AR_0142_chr_3	ST34	KL57	O1/O2v2	Entero_P1
NZ_CP028990.1	AR_0142	AR_0142_chr_4	ST34	KL57	O1/O2v2	Klebsi_ST16_OXA48phi5.4
NZ_CP028990.1	AR_0142	AR_0142_chr_6	ST34	KL57	O1/O2v2	Entero_HK225
NZ_CP021708.1	AR_0143	AR_0143_chr_1	ST14	KL2	O1/O2v1	Escher_HK639
NZ_CP021708.1	AR_0143	AR_0143_chr_2	ST14	KL2	O1/O2v1	Entero_phiP27
NZ_CP021708.1	AR_0143	AR_0143_chr_3	ST14	KL2	O1/O2v1	Entero_HK140
NZ_CP021708.1	AR_0143	AR_0143_chr_4	ST14	KL2	O1/O2v1	Erwini_vB_EhrS_59
NZ_CP021708.1	AR_0143	AR_0143_chr_5	ST14	KL2	O1/O2v1	Klebsi_ST16_OXA48phi5.4
NZ_CP021708.1	AR_0143	AR_0143_chr_6	ST14	KL2	O1/O2v1	Klebsi_ST437_OXA245phi4.1
NZ_CP021708.1	AR_0143	AR_0143_chr_7	ST14	KL2	O1/O2v1	Escher_500465_1
NZ_CP021939.1	AR_0145	AR_0145_chr_1	ST147	KL64	O1/O2v1	Klebsi_ST147_VIM1phi7.1
NZ_CP021939.1	AR_0145	AR_0145_chr_2	ST147	KL64	O1/O2v1	Bacill_vB_BtS_BMBtp14
NZ_CP021939.1	AR_0145	AR_0145_chr_3	ST147	KL64	O1/O2v1	Entero_mEp237
NZ_CP021939.1	AR_0145	AR_0145_chr_4	ST147	KL64	O1/O2v1	Erwini_vB_EhrS_59
NZ_CP021939.1	AR_0145	AR_0145_chr_5	ST147	KL64	O1/O2v1	Escher_500465_1
NZ_CP021685.1	AR_0146	AR_0146_chr_1	ST11	KL24	O1/O2v1	Entero_lambda
NZ_CP021685.1	AR_0146	AR_0146_chr_2	ST11	KL24	O1/O2v1	Salmon_ST64B
NZ_CP021685.1	AR_0146	AR_0146_chr_3	ST11	KL24	O1/O2v1	Entero_P4
NZ_CP021685.1	AR_0146	AR_0146_chr_4	ST11	KL24	O1/O2v1	Entero_P4
NZ_CP021685.1	AR_0146	AR_0146_chr_5	ST11	KL24	O1/O2v1	Erwini_vB_EhrS_59
NZ_CP021685.1	AR_0146	AR_0146_chr_6	ST11	KL24	O1/O2v1	Klebsi_ST512_KPC3phi13.2
NZ_CP021685.1	AR_0146	AR_0146_chr_7	ST11	KL24	O1/O2v1	Salmon_SEN34
NZ_CP021950.1	AR_0148	AR_0148_chr_1	ST11	KL24	O1/O2v1	Salmon_SEN34
NZ_CP021950.1	AR_0148	AR_0148_chr_2	ST11	KL24	O1/O2v1	Salmon_vB_SosS_Oslo
NZ_CP021950.1	AR_0148	AR_0148_chr_3	ST11	KL24	O1/O2v1	Klebsi_ST512_KPC3phi13.2
NZ_CP021950.1	AR_0148	AR_0148_chr_4	ST11	KL24	O1/O2v1	Erwini_vB_EhrS_59
NZ_CP021950.1	AR_0148	AR_0148_chr_5	ST11	KL24	O1/O2v1	Entero_P4
NZ_CP021950.1	AR_0148	AR_0148_chr_6	ST11	KL24	O1/O2v1	Entero_P4
NZ_CP021950.1	AR_0148	AR_0148_chr_7	ST11	KL24	O1/O2v1	Escher_503458
NZ_CP021950.1	AR_0148	AR_0148_chr_8	ST11	KL24	O1/O2v1	Entero_SfI
NZ_CP021950.1	AR_0148	AR_0148_chr_9	ST11	KL24	O1/O2v1	Entero_lambda
NZ_CP021944.1	AR_0152	AR_0152_chr_1	ST147	KL64	O1/O2v1	Erwini_vB_EhrS_59
NZ_CP021944.1	AR_0152	AR_0152_chr_2	ST147	KL64	O1/O2v1	Escher_500465_1
NZ_CP021944.1	AR_0152	AR_0152_chr_3	ST147	KL64	O1/O2v1	Klebsi_ST147_VIM1phi7.1
NZ_CP021944.1	AR_0152	AR_0152_chr_4	ST147	KL64	O1/O2v1	Entero_mEp237
NZ_CP028932.1	AR_0153	AR_0153_chr_1	ST14	KL2	O1/O2v1	Erwini_vB_EhrS_59
NZ_CP028932.1	AR_0153	AR_0153_chr_2	ST14	KL2	O1/O2v1	Entero_phiP27
NZ_CP028932.1	AR_0153	AR_0153_chr_3	ST14	KL2	O1/O2v1	Escher_HK639
NZ_CP021696.1	AR_0158	AR_0158_chr_1	ST163	KL12	O1/O2v1	Pectob_ZF40
NZ_CP021696.1	AR_0158	AR_0158_chr_2	ST163	KL12	O1/O2v1	Entero_HK225
NZ_CP021696.1	AR_0158	AR_0158_chr_3	ST163	KL12	O1/O2v1	Escher_phAPEC8
NZ_CP021696.1	AR_0158	AR_0158_chr_4	ST163	KL12	O1/O2v1	Klebsi_ST147_VIM1phi7.1
NZ_CP021696.1	AR_0158	AR_0158_chr_5	ST163	KL12	O1/O2v1	Escher_500465_1
NZ_CP032175.1	AR_0160	AR_0160_chr_1	ST36	KL27	O1/O2v2	Escher_500465_1
NZ_CP032175.1	AR_0160	AR_0160_chr_2	ST36	KL27	O1/O2v2	Pectob_ZF40
NZ_CP032175.1	AR_0160	AR_0160_chr_3	ST36	KL27	O1/O2v2	Klebsi_ST16_OXA48phi5.4
NZ_CP032175.1	AR_0160	AR_0160_chr_4	ST36	KL27	O1/O2v2	Entero_mEp237
NZ_CP027160.1	AR_0361	AR_0361_chr_1	ST258	KL106	O1/O2v2	Entero_P4
NZ_CP027160.1	AR_0361	AR_0361_chr_2	ST258	KL106	O1/O2v2	Klebsi_ST512_KPC3phi13.2
NZ_CP027160.1	AR_0361	AR_0361_chr_3	ST258	KL106	O1/O2v2	Microc_Ma_LMM01
NZ_CP027160.1	AR_0361	AR_0361_chr_4	ST258	KL106	O1/O2v2	Escher_500465_1
NZ_CP027160.1	AR_0361	AR_0361_chr_5	ST258	KL106	O1/O2v2	Salmon_ST64B
NZ_CP027160.1	AR_0361	AR_0361_chr_6	ST258	KL106	O1/O2v2	Entero_P4
NZ_CP027146.1	AR_0363	AR_0363_chr_1	ST258	KL63	O1/O2v2	Escher_HK639
NZ_CP027146.1	AR_0363	AR_0363_chr_2	ST258	KL63	O1/O2v2	Entero_P4
NZ_CP027146.1	AR_0363	AR_0363_chr_3	ST258	KL63	O1/O2v2	Entero_P4
NZ_CP027146.1	AR_0363	AR_0363_chr_4	ST258	KL63	O1/O2v2	Escher_503458
NZ_CP027146.1	AR_0363	AR_0363_chr_5	ST258	KL63	O1/O2v2	Entero_SfI
NZ_CP027146.1	AR_0363	AR_0363_chr_6	ST258	KL63	O1/O2v2	Escher_500465_1
NZ_CP027146.1	AR_0363	AR_0363_chr_7	ST258	KL63	O1/O2v2	Escher_RCS47
NZ_CP027146.1	AR_0363	AR_0363_chr_8	ST258	KL63	O1/O2v2	Salmon_SEN34
NZ_CP030341.1	AR_362	AR_362_chr_1	ST258	KL107	O1/O2v2	Entero_SfI
NZ_CP030341.1	AR_362	AR_362_chr_2	ST258	KL107	O1/O2v2	Klebsi_ST437_OXA245phi4.1
NZ_CP030341.1	AR_362	AR_362_chr_3	ST258	KL107	O1/O2v2	Escher_phiV10
NZ_CP030341.1	AR_362	AR_362_chr_4	ST258	KL107	O1/O2v2	Microc_MaMV_DC
NZ_CP030341.1	AR_362	AR_362_chr_5	ST258	KL107	O1/O2v2	Salmon_SEN34
NZ_CP030341.1	AR_362	AR_362_chr_6	ST258	KL107	O1/O2v2	Klebsi_ST512_KPC3phi13.2
NZ_CP030341.1	AR_362	AR_362_chr_7	ST258	KL107	O1/O2v2	Erwini_vB_EhrS_59
NZ_CP030341.1	AR_362	AR_362_chr_8	ST258	KL107	O1/O2v2	Entero_P4
NZ_CP030341.1	AR_362	AR_362_chr_9	ST258	KL107	O1/O2v2	Entero_P4
NZ_CP030341.1	AR_362	AR_362_chr_10	ST258	KL107	O1/O2v2	Escher_503458
NZ_CP015134.1	ATCC 35657	ATCC35657_chr_1	ST505	KL64	O1/O2v1	Escher_500465_1
NZ_CP015134.1	ATCC 35657	ATCC35657_chr_3	ST505	KL64	O1/O2v1	Klebsi_phiKO2
NZ_CP015134.1	ATCC 35657	ATCC35657_chr_4	ST505	KL64	O1/O2v1	Salmon_SEN34
NZ_CP015134.1	ATCC 35657	ATCC35657_chr_5	ST505	KL64	O1/O2v1	Erwini_vB_EhrS_59
NZ_CP064352.1	ATCC 43816	ATCC_43816_chr_1	ST493	KL2	O1/O2v1	Entero_mEp390
NZ_CP064352.1	ATCC 43816	ATCC_43816_chr_2	ST493	KL2	O1/O2v1	Cronob_ESSI_2
NZ_CP064352.1	ATCC 43816	ATCC_43816_chr_3	ST493	KL2	O1/O2v1	Escher_500465_1
NZ_CP009208.1	ATCC 43816 KPPR1	ATCC_43816_KPPR1_chr_1	ST493	KL2	O1/O2v1	Cronob_ESSI_2
NZ_CP009208.1	ATCC 43816 KPPR1	ATCC_43816_KPPR1_chr_2	ST493	KL2	O1/O2v1	Escher_500465_1
NZ_CP009208.1	ATCC 43816 KPPR1	ATCC_43816_KPPR1_chr_3	ST493	KL2	O1/O2v1	Entero_HK140
NZ_CP006659.2	ATCC BAA-2146	ATCC_BAA-2146_chr_1_1	ST11	KL74	O3b	Entero_P4
NZ_CP006659.2	ATCC BAA-2146	ATCC_BAA-2146_chr_1_2	ST11	KL74	O3b	Erwini_vB_EhrS_59
NZ_CP006659.2	ATCC BAA-2146	ATCC_BAA-2146_chr_1_3	ST11	KL74	O3b	Klebsi_ST512_KPC3phi13.2
NZ_CP006659.2	ATCC BAA-2146	ATCC_BAA-2146_chr_1_4	ST11	KL74	O3b	Escher_HK639
NZ_CP006659.2	ATCC BAA-2146	ATCC_BAA-2146_chr_1_6	ST11	KL74	O3b	Salmon_SEN34
NZ_CP006659.2	ATCC BAA-2146	ATCC_BAA-2146_chr_1_7	ST11	KL74	O3b	Shigel_SfIV
NZ_CP006659.2	ATCC BAA-2146	ATCC_BAA-2146_chr_1_8	ST11	KL74	O3b	Bacill_SP_15
NZ_CP006659.2	ATCC BAA-2146	ATCC_BAA-2146_chr_1_9	ST11	KL74	O3b	Escher_phiV10
NZ_CP006659.2	ATCC BAA-2146	ATCC_BAA-2146_chr_1_10	ST11	KL74	O3b	Klebsi_ST437_OXA245phi4.1
NZ_CP006659.2	ATCC BAA-2146	ATCC_BAA-2146_chr_1_11	ST11	KL74	O3b	Salmon_118970_sal3
NZ_CP087272.1	ATCC BAA 2146	ATCC_BAA_2146_chr_1	ST11	KL74	O3b	Salmon_118970_sal3
NZ_CP087272.1	ATCC BAA 2146	ATCC_BAA_2146_chr_2	ST11	KL74	O3b	Klebsi_ST437_OXA245phi4.1
NZ_CP087272.1	ATCC BAA 2146	ATCC_BAA_2146_chr_3	ST11	KL74	O3b	Escher_phiV10
NZ_CP087272.1	ATCC BAA 2146	ATCC_BAA_2146_chr_4	ST11	KL74	O3b	Escher_SH2026Stx1
NZ_CP087272.1	ATCC BAA 2146	ATCC_BAA_2146_chr_5	ST11	KL74	O3b	Stx2_c_1717
NZ_CP087272.1	ATCC BAA 2146	ATCC_BAA_2146_chr_6	ST11	KL74	O3b	Shigel_SfIV
NZ_CP087272.1	ATCC BAA 2146	ATCC_BAA_2146_chr_7	ST11	KL74	O3b	Salmon_vB_SosS_Oslo
NZ_CP087272.1	ATCC BAA 2146	ATCC_BAA_2146_chr_8	ST11	KL74	O3b	Salmon_SEN34
NZ_CP087272.1	ATCC BAA 2146	ATCC_BAA_2146_chr_9	ST11	KL74	O3b	Escher_ArgO145
NZ_CP087272.1	ATCC BAA 2146	ATCC_BAA_2146_chr_10	ST11	KL74	O3b	Klebsi_ST512_KPC3phi13.2
NZ_CP087272.1	ATCC BAA 2146	ATCC_BAA_2146_chr_11	ST11	KL74	O3b	Erwini_vB_EhrS_59
NZ_CP087272.1	ATCC BAA 2146	ATCC_BAA_2146_chr_12	ST11	KL74	O3b	Entero_P4
NZ_CP025005.1	AUSMDU00003562	AUSMDU00003562_chr_1	ST258	KL106	O1/O2v2	Salmon_ST64B
NZ_CP025005.1	AUSMDU00003562	AUSMDU00003562_chr_2	ST258	KL106	O1/O2v2	Escher_500465_1
NZ_CP025005.1	AUSMDU00003562	AUSMDU00003562_chr_3	ST258	KL106	O1/O2v2	Escher_phiV10
NZ_CP025005.1	AUSMDU00003562	AUSMDU00003562_chr_4	ST258	KL106	O1/O2v2	Escher_RCS47
NZ_CP025005.1	AUSMDU00003562	AUSMDU00003562_chr_5	ST258	KL106	O1/O2v2	Salmon_SEN34
NZ_CP025005.1	AUSMDU00003562	AUSMDU00003562_chr_6	ST258	KL106	O1/O2v2	Escher_HK639
NZ_CP025005.1	AUSMDU00003562	AUSMDU00003562_chr_7	ST258	KL106	O1/O2v2	Pectob_ZF40
NZ_CP025005.1	AUSMDU00003562	AUSMDU00003562_chr_8	ST258	KL106	O1/O2v2	Klebsi_ST512_KPC3phi13.2
NZ_CP025005.1	AUSMDU00003562	AUSMDU00003562_chr_9	ST258	KL106	O1/O2v2	Erwini_vB_EhrS_59
NZ_CP025005.1	AUSMDU00003562	AUSMDU00003562_chr_10	ST258	KL106	O1/O2v2	Entero_P4
NZ_CP025005.1	AUSMDU00003562	AUSMDU00003562_chr_11	ST258	KL106	O1/O2v2	Entero_P4
NZ_CP025005.1	AUSMDU00003562	AUSMDU00003562_chr_12	ST258	KL106	O1/O2v2	Escher_503458
NZ_CP022691.2	AUSMDU00008079	AUSMDU00008079_chr_1	ST258	KL106	O1/O2v2	Entero_SfI
NZ_CP022691.2	AUSMDU00008079	AUSMDU00008079_chr_2	ST258	KL106	O1/O2v2	Escher_500465_1
NZ_CP022691.2	AUSMDU00008079	AUSMDU00008079_chr_3	ST258	KL106	O1/O2v2	Escher_phiV10
NZ_CP022691.2	AUSMDU00008079	AUSMDU00008079_chr_4	ST258	KL106	O1/O2v2	Microc_Ma_LMM01
NZ_CP022691.2	AUSMDU00008079	AUSMDU00008079_chr_5	ST258	KL106	O1/O2v2	Salmon_SEN34
NZ_CP022691.2	AUSMDU00008079	AUSMDU00008079_chr_6	ST258	KL106	O1/O2v2	Escher_HK639
NZ_CP022691.2	AUSMDU00008079	AUSMDU00008079_chr_7	ST258	KL106	O1/O2v2	Klebsi_ST512_KPC3phi13.2
NZ_CP022691.2	AUSMDU00008079	AUSMDU00008079_chr_8	ST258	KL106	O1/O2v2	Erwini_vB_EhrS_59
NZ_CP022691.2	AUSMDU00008079	AUSMDU00008079_chr_9	ST258	KL106	O1/O2v2	Entero_P4
NZ_CP022691.2	AUSMDU00008079	AUSMDU00008079_chr_10	ST258	KL106	O1/O2v2	Entero_P4
NZ_CP025008.1	AUSMDU00008119	AUSMDU00008119_chr_1	ST258	KL106	O1/O2v2	Entero_SfI
NZ_CP025008.1	AUSMDU00008119	AUSMDU00008119_chr_2	ST258	KL106	O1/O2v2	Escher_500465_1
NZ_CP025008.1	AUSMDU00008119	AUSMDU00008119_chr_3	ST258	KL106	O1/O2v2	Escher_phiV10
NZ_CP025008.1	AUSMDU00008119	AUSMDU00008119_chr_4	ST258	KL106	O1/O2v2	Escher_RCS47
NZ_CP025008.1	AUSMDU00008119	AUSMDU00008119_chr_5	ST258	KL106	O1/O2v2	Salmon_SEN34
NZ_CP025008.1	AUSMDU00008119	AUSMDU00008119_chr_6	ST258	KL106	O1/O2v2	Escher_HK639
NZ_CP025008.1	AUSMDU00008119	AUSMDU00008119_chr_7	ST258	KL106	O1/O2v2	Klebsi_ST512_KPC3phi13.2
NZ_CP025008.1	AUSMDU00008119	AUSMDU00008119_chr_8	ST258	KL106	O1/O2v2	Erwini_vB_EhrS_59
NZ_CP025008.1	AUSMDU00008119	AUSMDU00008119_chr_9	ST258	KL106	O1/O2v2	Entero_P4
NZ_CP025008.1	AUSMDU00008119	AUSMDU00008119_chr_10	ST258	KL106	O1/O2v2	Entero_P4
NZ_CP086761.1	AZS099	AZS099_chr_1	ST20	KL28	O1/O2v2	Escher_500465_1
NZ_CP086761.1	AZS099	AZS099_chr_2	ST20	KL28	O1/O2v2	Entero_c_1
NZ_CP086761.1	AZS099	AZS099_chr_3	ST20	KL28	O1/O2v2	Erwini_vB_EhrS_59
NZ_CP072456.1	b1-2L	b1-2L_chr_1	ST727	KL23	O1/O2v2	Escher_500465_1
NZ_CP072456.1	b1-2L	b1-2L_chr_2	ST727	KL23	O1/O2v2	Entero_mEp390
NZ_CP072456.1	b1-2L	b1-2L_chr_3	ST727	KL23	O1/O2v2	Escher_HK639
NZ_CP072456.1	b1-2L	b1-2L_chr_5	ST727	KL23	O1/O2v2	Entero_mEp235
NZ_CP072456.1	b1-2L	b1-2L_chr_6	ST727	KL23	O1/O2v2	Erwini_vB_EhrS_59
NZ_CP070445.1	B12097	B12097_chr_1	ST231	KL51	O1/O2v2	Entero_P4
NZ_CP070445.1	B12097	B12097_chr_2	ST231	KL51	O1/O2v2	Escher_500465_1
NZ_CP070445.1	B12097	B12097_chr_3	ST231	KL51	O1/O2v2	Entero_I2_2
NZ_CP070445.1	B12097	B12097_chr_4	ST231	KL51	O1/O2v2	Entero_c_1
NZ_CP070445.1	B12097	B12097_chr_5	ST231	KL51	O1/O2v2	Salmon_118970_sal3
NZ_CP070445.1	B12097	B12097_chr_6	ST231	KL51	O1/O2v2	Mycoba_Jolie1
NZ_CP026155.1	B12(AN)	B12AN_chr_1	ST11	KL15	O4	Entero_SfI
NZ_CP026155.1	B12(AN)	B12AN_chr_2	ST11	KL15	O4	Escher_500465_1
NZ_CP026155.1	B12(AN)	B12AN_chr_3	ST11	KL15	O4	Escher_RCS47
NZ_CP026155.1	B12(AN)	B12AN_chr_5	ST11	KL15	O4	Escher_RCS47
NZ_CP026155.1	B12(AN)	B12AN_chr_6	ST11	KL15	O4	Escher_RCS47
NZ_CP026155.1	B12(AN)	B12AN_chr_7	ST11	KL15	O4	Salmon_SEN34
NZ_CP026155.1	B12(AN)	B12AN_chr_8	ST11	KL15	O4	Klebsi_4LV2017
NZ_CP026155.1	B12(AN)	B12AN_chr_9	ST11	KL15	O4	Erwini_vB_EhrS_59
NZ_CP026155.1	B12(AN)	B12AN_chr_10	ST11	KL15	O4	Entero_P4
NZ_CP072403.1	B13243	B13243_chr_1	ST231	KL51	O1/O2v2	Entero_P4
NZ_CP072403.1	B13243	B13243_chr_2	ST231	KL51	O1/O2v2	Escher_500465_1
NZ_CP072403.1	B13243	B13243_chr_3	ST231	KL51	O1/O2v2	Entero_I2_2
NZ_CP072403.1	B13243	B13243_chr_4	ST231	KL51	O1/O2v2	Entero_I2_2
NZ_CP072403.1	B13243	B13243_chr_5	ST231	KL51	O1/O2v2	Entero_I2_2
NZ_CP072403.1	B13243	B13243_chr_6	ST231	KL51	O1/O2v2	Entero_c_1
NZ_CP072403.1	B13243	B13243_chr_7	ST231	KL51	O1/O2v2	Salmon_SEN8
NZ_CP072403.1	B13243	B13243_chr_8	ST231	KL51	O1/O2v2	Salmon_118970_sal3
NZ_CP072403.1	B13243	B13243_chr_9	ST231	KL51	O1/O2v2	Burkho_KL3
NZ_CP070415.1	B1347	B1347_chr_1	ST231	KL51	O1/O2v2	Entero_P4
NZ_CP070415.1	B1347	B1347_chr_2	ST231	KL51	O1/O2v2	Escher_500465_1
NZ_CP070415.1	B1347	B1347_chr_3	ST231	KL51	O1/O2v2	Entero_I2_2
NZ_CP070415.1	B1347	B1347_chr_4	ST231	KL51	O1/O2v2	Entero_I2_2
NZ_CP070415.1	B1347	B1347_chr_5	ST231	KL51	O1/O2v2	Entero_I2_2
NZ_CP070415.1	B1347	B1347_chr_6	ST231	KL51	O1/O2v2	Entero_c_1
NZ_CP070415.1	B1347	B1347_chr_7	ST231	KL51	O1/O2v2	Salmon_SEN8
NZ_CP070415.1	B1347	B1347_chr_8	ST231	KL51	O1/O2v2	Salmon_118970_sal3
NZ_CP070415.1	B1347	B1347_chr_9	ST231	KL51	O1/O2v2	Rhizob_16_3
NZ_CP084168.1	B17602	B17602_chr_1	ST35	KL16	O1/O2v1	Salmon_118970_sal3
NZ_CP084168.1	B17602	B17602_chr_2	ST35	KL16	O1/O2v1	Escher_500465_1
NZ_CP084168.1	B17602	B17602_chr_4	ST35	KL16	O1/O2v1	Escher_SH2026Stx1
NZ_CP084168.1	B17602	B17602_chr_5	ST35	KL16	O1/O2v1	Entero_phiP27
NZ_CP070449.1	B18064	B18064_chr_1	ST231	KL51	O1/O2v2	Entero_P4
NZ_CP070449.1	B18064	B18064_chr_2	ST231	KL51	O1/O2v2	Escher_500465_1
NZ_CP070449.1	B18064	B18064_chr_3	ST231	KL51	O1/O2v2	Entero_I2_2
NZ_CP070449.1	B18064	B18064_chr_4	ST231	KL51	O1/O2v2	Entero_I2_2
NZ_CP070449.1	B18064	B18064_chr_5	ST231	KL51	O1/O2v2	Entero_I2_2
NZ_CP070449.1	B18064	B18064_chr_6	ST231	KL51	O1/O2v2	Entero_c_1
[truncated: 7,756 more rows]
