# Supplementary material for: Characterization and Diversity of Klebsiella pneumoniae Prophages
Source: Int J Mol Sci. 2023 May 23;24(11):9116. doi: 10.3390/ijms24119116 (PMC10252525; doi:10.3390/ijms24119116)
Supplement: Supplementary file 1 [file ijms-24-09116-s001.zip › Supplementary Table S3.tsv]

Strain_RefSeq_Accn	Strain_Name	Prophage_Name	Most_Common_Phage	Strain_GC%	Prophage_GC%
NZ_CP025515.1	002SK2	002SK2_chr_1	Erwini_vB_EhrS_59	58.5	53.7
NZ_CP025515.1	002SK2	002SK2_chr_2	Klebsi_phiKO2	58.5	54.4
NZ_CP025515.1	002SK2	002SK2_chr_3	Entero_mEp235	58.5	53.9
NZ_CP025515.1	002SK2	002SK2_chr_4	Entero_mEp235	58.5	53.8
NZ_CP025515.1	002SK2	002SK2_chr_5	Salmon_118970_sal3	58.5	50.1
NZ_CP025515.1	002SK2	002SK2_chr_6	Klebsi_ST147_VIM1phi7.1	58.5	53.5
NZ_CP025516.1	002SK2	002SK2_pla_p002SK2_A_1	Escher_RCS47	53.6	51.8
NZ_CP025516.1	002SK2	002SK2_pla_p002SK2_A_2	Escher_RCS47	53.6	56.4
NZ_CP025517.1	002SK2	002SK2_pla_p002SK2_B_1	Salmon_SJ46	54.1	52.5
NZ_CP083075.1	0113481141	0113481141_chr_1	Shigel_SfIV	58.3	51
NZ_CP083075.1	0113481141	0113481141_chr_2	Klebsi_ST147_VIM1phi7.1	58.3	53.8
NZ_CP083075.1	0113481141	0113481141_chr_3	Entero_mEp213	58.3	50.3
NZ_CP083075.1	0113481141	0113481141_chr_4	Salmon_Fels_1	58.3	54.5
NZ_CP083075.1	0113481141	0113481141_chr_5	Haemop_SuMu	58.3	54
NZ_CP083075.1	0113481141	0113481141_chr_6	Erwini_vB_EhrS_59	58.3	54
NZ_CP083075.1	0113481141	0113481141_chr_7	Bacill_vB_BtS_BMBtp14	58.3	59.1
NZ_CP083076.1	0113481141	0113481141_pla_p1-0113481141_2	Stx2_c_Stx2a_WGPS9	54.2	54.8
NZ_CP083077.1	0113481141	0113481141_pla_p2-0113481141-OXA48_1	Cronob_ENT39118	51.6	51.9
NZ_CP083078.1	0113481141	0113481141_pla_p3-0113481141_1	Escher_RCS47	53.9	54.9
NZ_CP033396.2	015625	015625_chr_1	Shigel_SfIV	58.5	54.2
NZ_CP033396.2	015625	015625_chr_2	Escher_RCS47	58.5	48.7
NZ_CP033396.2	015625	015625_chr_3	Escher_phiV10	58.5	56.5
NZ_CP033396.2	015625	015625_chr_4	Klebsi_ST437_OXA245phi4.1	58.5	54.7
NZ_CP033396.2	015625	015625_chr_5	Escher_vB_EcoM_Schickermooser	58.5	51.5
NZ_CP033396.2	015625	015625_chr_6	Escher_RCS47	58.5	54.3
NZ_CP033396.2	015625	015625_chr_7	Salmon_SEN34	58.5	54.5
NZ_CP033396.2	015625	015625_chr_8	Cronob_ENT39118	58.5	55.1
NZ_CP033396.2	015625	015625_chr_9	Escher_HK639	58.5	54.5
NZ_CP033396.2	015625	015625_chr_10	Klebsi_phiKO2	58.5	55.1
NZ_CP033396.2	015625	015625_chr_11	Klebsi_ST512_KPC3phi13.2	58.5	55.2
NZ_CP033396.2	015625	015625_chr_12	Entero_P4	58.5	56.4
NZ_CP033396.2	015625	015625_chr_13	Entero_P4	58.5	53.6
NZ_CP033394.2	015625	015625_pla_pCTXM65_015625_2	Escher_RCS47	55.3	56.1
NZ_CP033395.2	015625	015625_pla_pKPC12_015625_1	Entero_P1	56.1	55.1
NZ_CP033395.2	015625	015625_pla_pKPC12_015625_2	Escher_RCS47	56.1	56.8
NZ_CP083051.1	0213293972	0213293972_chr_1	Escher_500465_1	58.5	52.6
NZ_CP083051.1	0213293972	0213293972_chr_2	Erwini_vB_EhrS_59	58.5	53.8
NZ_CP083051.1	0213293972	0213293972_chr_3	Entero_HK140	58.5	54.3
NZ_CP083051.1	0213293972	0213293972_chr_4	Entero_mEp237	58.5	52.5
NZ_CP083052.1	0213293972	0213293972_pla_p1-0213293972_1	Stx2_c_Stx2a_F451	51.2	53.4
NZ_CP083052.1	0213293972	0213293972_pla_p1-0213293972_2	Escher_RCS47	51.2	50.2
NZ_CP083053.1	0213293972	0213293972_pla_p2-0213293972-OXA48_1	Cronob_ENT39118	52.6	51.8
NZ_CP084873.1	03-9138-2	03-9138-2_chr_1	Escher_500465_1	58.5	52.5
NZ_CP084873.1	03-9138-2	03-9138-2_chr_2	Burkho_KS9	58.5	57.8
NZ_CP084873.1	03-9138-2	03-9138-2_chr_3	Erwini_vB_EhrS_59	58.5	52.8
NZ_CP084871.1	04A025	04A025_chr_1	Entero_186	58.5	48.6
NZ_CP084871.1	04A025	04A025_chr_2	Klebsi_ST147_VIM1phi7.1	58.5	56.1
NZ_CP084871.1	04A025	04A025_chr_3	Escher_500465_1	58.5	52.6
NZ_CP084871.1	04A025	04A025_chr_4	Entero_mEp213	58.5	51.9
NZ_CP084871.1	04A025	04A025_chr_5	Salmon_118970_sal3	58.5	51.8
NZ_CP084872.1	04A025	04A025_pla_pKp_04A025_1_1	Salmon_SJ46	53.1	54.1
NZ_CP084872.1	04A025	04A025_pla_pKp_04A025_1_2	Escher_RCS47	53.1	51.1
NZ_CP049719.1	06KM907	06KM907_chr_1	Salmon_ST64B	58.5	54.2
NZ_CP049719.1	06KM907	06KM907_chr_2	Klebsi_ST147_VIM1phi7.1	58.5	54.3
NZ_CP049719.1	06KM907	06KM907_chr_3	Escher_500465_1	58.5	52.5
NZ_CP049719.1	06KM907	06KM907_chr_4	Salmon_SEN34	58.5	56.2
NZ_CP049719.1	06KM907	06KM907_chr_5	Salmon_SEN34	58.5	54.8
NZ_CP049719.1	06KM907	06KM907_chr_6	Staphy_SPbeta_like	58.5	58.5
NZ_CP049719.1	06KM907	06KM907_chr_7	Escher_HK639	58.5	53.6
NZ_CP049719.1	06KM907	06KM907_chr_8	Klebsi_ST512_KPC3phi13.2	58.5	53.4
NZ_CP049719.1	06KM907	06KM907_chr_9	Entero_P4	58.5	56.3
NZ_CP049719.1	06KM907	06KM907_chr_10	Entero_P4	58.5	51.1
NZ_CP049719.1	06KM907	06KM907_chr_11	Bacill_vB_BtS_BMBtp14	58.5	59
NZ_CP049720.1	06KM907	06KM907_pla_pMBR_F_DHA-1_1	Escher_RCS47	53.5	60.4
NZ_CP049720.1	06KM907	06KM907_pla_pMBR_F_DHA-1_2	Stx2_c_1717	53.5	55.1
NZ_CP049720.1	06KM907	06KM907_pla_pMBR_F_DHA-1_3	Escher_RCS47	53.5	55.5
NZ_CP025576.1	08EU827	08EU827_chr_1	Klebsi_ST147_VIM1phi7.1	58.6	56.5
NZ_CP025576.1	08EU827	08EU827_chr_2	Escher_500465_1	58.6	57.6
NZ_CP025576.1	08EU827	08EU827_chr_3	Klebsi_ST16_OXA48phi5.4	58.6	52.9
NZ_CP025576.1	08EU827	08EU827_chr_4	Entero_mEp213	58.6	55
NZ_CP025576.1	08EU827	08EU827_chr_5	Entero_P4	58.6	50.2
NZ_CP025577.1	08EU827	08EU827_pla_p08EU827_1_1	Plankt_PaV_LD	52.8	52.8
NZ_CP025577.1	08EU827	08EU827_pla_p08EU827_1_2	Escher_RCS47	52.8	55.2
NZ_CP025577.1	08EU827	08EU827_pla_p08EU827_1_3	Escher_RCS47	52.8	51.3
NZ_CP025578.1	08EU827	08EU827_pla_p08EU827_2_1	Escher_RCS47	53.7	53.5
NZ_CP025578.1	08EU827	08EU827_pla_p08EU827_2_3	Salmon_SJ46	53.7	49.2
NZ_CP042321.1	1-16	1-16_chr_1	Salmon_118970_sal3	58.6	53.9
NZ_CP042321.1	1-16	1-16_chr_2	Entero_P4	58.6	51.4
NZ_CP042321.1	1-16	1-16_chr_3	Entero_P4	58.6	53.6
NZ_CP042321.1	1-16	1-16_chr_4	Erwini_vB_EhrS_59	58.6	53.8
NZ_CP042321.1	1-16	1-16_chr_5	Klebsi_ST512_KPC3phi13.2	58.6	52.3
NZ_CP042321.1	1-16	1-16_chr_6	Salmon_SEN34	58.6	53
NZ_CP042321.1	1-16	1-16_chr_7	Escher_RCS47	58.6	44.2
NZ_CP042321.1	1-16	1-16_chr_8	Escher_500465_1	58.6	57.7
NZ_CP042311.1	101-17	101-17_chr_1	Entero_SfI	58.6	54.1
NZ_CP042311.1	101-17	101-17_chr_2	Entero_P4	58.6	51.4
NZ_CP042311.1	101-17	101-17_chr_3	Entero_P4	58.6	53.6
NZ_CP042311.1	101-17	101-17_chr_4	Erwini_vB_EhrS_59	58.6	53.9
NZ_CP042311.1	101-17	101-17_chr_5	Klebsi_ST512_KPC3phi13.2	58.6	52.3
NZ_CP042311.1	101-17	101-17_chr_6	Salmon_SEN34	58.6	52.6
NZ_CP042311.1	101-17	101-17_chr_7	Escher_RCS47	58.6	44.2
NZ_CP042311.1	101-17	101-17_chr_8	Klebsi_ST437_OXA245phi4.1	58.6	54.8
NZ_OW970374.1	101	1011_chr_main_1	Klebsi_ST13_OXA48phi12.1	58.3	54
NZ_OW970374.1	101	1011_chr_main_2	Escher_500465_1	58.3	57.6
NZ_OW970374.1	101	1011_chr_main_3	Escher_phiV10	58.3	53.4
NZ_OW970374.1	101	1011_chr_main_4	Escher_phAPEC8	58.3	51.2
NZ_OW970374.1	101	1011_chr_main_5	Salmon_118970_sal3	58.3	52.6
NZ_OW970374.1	101	1011_chr_main_6	Klebsi_3LV2017	58.3	56.2
NZ_OW970374.1	101	1011_chr_main_7	Klebsi_ST437_OXA245phi4.1	58.3	53.5
NZ_OW970374.1	101	1011_chr_main_8	Erwini_vB_EhrS_59	58.3	54.1
NZ_OW970375.1	101	1011_pla_P1_1	Salmon_SJ46	52.9	54
NZ_OW970375.1	101	1011_pla_P1_2	Escher_503458	52.9	54.5
NZ_OW970375.1	101	1011_pla_P1_3	Escher_RCS47	52.9	54.2
NZ_OW970376.1	101	1011_pla_P2_1	Escher_RCS47	53.7	54.7
NZ_OW970444.1	101	1012_chr_main_1	Klebsi_ST147_VIM1phi7.1	58.4	50.2
NZ_OW970444.1	101	1012_chr_main_2	Escher_500465_1	58.4	57.6
NZ_OW970444.1	101	1012_chr_main_3	Escher_phiV10	58.4	53.4
NZ_OW970444.1	101	1012_chr_main_4	Salmon_118970_sal3	58.4	52.7
NZ_OW970444.1	101	1012_chr_main_5	Klebsi_3LV2017	58.4	56.2
NZ_OW970444.1	101	1012_chr_main_6	Erwini_vB_EhrS_59	58.4	54.1
NZ_OW970445.1	101	1012_pla_P1_1	Escher_RCS47	54.7	59.7
NZ_OW970445.1	101	1012_pla_P1_2	Salmon_SJ46	54.7	54.5
NZ_OW970446.1	101	1012_pla_P2_1	Escher_RCS47	50.7	50.9
NZ_OW970447.1	101	1012_pla_P3_1	Escher_RCS47	53.8	55
NZ_CP100312.1	1020	1020_chr_1	Klebsi_ST15_OXA48phi14.1	58.7	54.3
NZ_CP100312.1	1020	1020_chr_2	Escher_500465_1	58.7	56.8
NZ_CP100312.1	1020	1020_chr_3	Escher_HK639	58.7	53.9
NZ_CP100314.1	1020	1020_pla_pKPN_1020_1	Escher_RCS47	53.5	56.2
NZ_CP100314.1	1020	1020_pla_pKPN_1020_2	Escher_RCS47	53.5	54.4
NZ_CP100313.1	1020	1020_pla_pKpQIL_1020_1	Salmon_SJ46	54.8	56.7
NZ_CP100308.1	1021	1021_chr_1	Klebsi_ST15_OXA48phi14.1	58.7	54.3
NZ_CP100308.1	1021	1021_chr_2	Escher_500465_1	58.7	56.8
NZ_CP100308.1	1021	1021_chr_3	Escher_HK639	58.7	53.9
NZ_CP100310.1	1021	1021_pla_pKPN_1021_1	Escher_RCS47	53.5	56.2
NZ_CP100310.1	1021	1021_pla_pKPN_1021_2	Escher_RCS47	53.5	54.4
NZ_CP100309.1	1021	1021_pla_pKpQIL_1021_1	Salmon_SJ46	54.8	56.7
NZ_CP042310.1	103-17	103-17_chr_1	Shigel_SfIV	58.6	53.9
NZ_CP042310.1	103-17	103-17_chr_2	Entero_P4	58.6	51.4
NZ_CP042310.1	103-17	103-17_chr_3	Entero_P4	58.6	53.6
NZ_CP042310.1	103-17	103-17_chr_4	Erwini_vB_EhrS_59	58.6	53.9
NZ_CP042310.1	103-17	103-17_chr_5	Klebsi_ST512_KPC3phi13.2	58.6	52.3
NZ_CP042310.1	103-17	103-17_chr_6	Salmon_SEN34	58.6	53
NZ_CP042310.1	103-17	103-17_chr_7	Microc_Ma_LMM01	58.6	44.2
NZ_CP042310.1	103-17	103-17_chr_8	Klebsi_ST437_OXA245phi4.1	58.6	54.8
NZ_CP023416.1	1050	1050_chr_1	Klebsi_ST147_VIM1phi7.1	58.6	54.5
NZ_CP023416.1	1050	1050_chr_2	Entero_mEp237	58.6	53.8
NZ_CP023416.1	1050	1050_chr_3	Escher_phiV10	58.6	54.6
NZ_CP023416.1	1050	1050_chr_4	Salmon_SEN34	58.6	53.7
NZ_CP023416.1	1050	1050_chr_5	Klebsi_phiKO2	58.6	53
NZ_CP023417.1	1050	1050_pla_pKp1050-1_1	Bacill_PfEFR_4	51.5	55
NZ_CP023417.1	1050	1050_pla_pKp1050-1_2	Escher_SH2026Stx1	51.5	52.1
NZ_CP023417.1	1050	1050_pla_pKp1050-1_3	Ralsto_RsoM1USA	51.5	46.3
NZ_CP023417.1	1050	1050_pla_pKp1050-1_4	Escher_SH2026Stx1	51.5	52
NZ_CP023417.1	1050	1050_pla_pKp1050-1_5	Escher_SH2026Stx1	51.5	55.8
NZ_CP023418.1	1050	1050_pla_pKp1050-2_1	Klebsi_phiKO2	56.5	54.6
NZ_CP023419.1	1050	1050_pla_pKp1050-3_1	Escher_RCS47	52.9	55
NZ_CP023420.1	1050	1050_pla_pKp1050-4_1	Escher_RCS47	51.9	55.3
NZ_CP023420.1	1050	1050_pla_pKp1050-4_2	Salmon_SJ46	51.9	50.4
NZ_CP023421.1	1050	1050_pla_unnamed_1	Klebsi_phiKO2	54.8	54.7
NC_018522.1	1084	1084_chr_1	Escher_500465_1	58.5	57.4
NC_018522.1	1084	1084_chr_2	Bacill_SP_15	58.5	58
NC_018522.1	1084	1084_chr_3	Bacill_PBS1	58.5	48.4
NC_018522.1	1084	1084_chr_4	Klebsi_phiKO2	58.5	55.8
NZ_CP042309.1	109-17	109-17_chr_1	Shigel_SfIV	58.6	53.9
NZ_CP042309.1	109-17	109-17_chr_2	Entero_P4	58.6	51.4
NZ_CP042309.1	109-17	109-17_chr_3	Entero_P4	58.6	53.6
NZ_CP042309.1	109-17	109-17_chr_4	Erwini_vB_EhrS_59	58.6	53.8
NZ_CP042309.1	109-17	109-17_chr_5	Klebsi_ST512_KPC3phi13.2	58.6	50.5
NZ_CP042309.1	109-17	109-17_chr_6	Salmon_SEN34	58.6	52.7
NZ_CP042309.1	109-17	109-17_chr_7	Microc_MaMV_DC	58.6	44.2
NZ_CP042309.1	109-17	109-17_chr_8	Escher_500465_1	58.6	57.6
NZ_CP091813.1	10MC160002271	10MC160002271_chr_1	Klebsi_ST147_VIM1phi7.1	58.5	53.5
NZ_CP091813.1	10MC160002271	10MC160002271_chr_2	Salmon_SEN34	58.5	54
NZ_CP091813.1	10MC160002271	10MC160002271_chr_3	Klebsi_ST13_OXA48phi12.1	58.5	58.8
NZ_CP091813.1	10MC160002271	10MC160002271_chr_4	Escher_500465_1	58.5	48.8
NZ_CP091813.1	10MC160002271	10MC160002271_chr_5	Escher_phiV10	58.5	54.5
NZ_CP091813.1	10MC160002271	10MC160002271_chr_6	Entero_mEp237	58.5	52.8
NZ_CP091813.1	10MC160002271	10MC160002271_chr_7	Klebsi_4LV2017	58.5	52.3
NZ_CP091814.1	10MC160002271	10MC160002271_pla_pFQ61_ST383_NDM-5_1	Bacill_G	48.6	44.2
NZ_CP091814.1	10MC160002271	10MC160002271_pla_pFQ61_ST383_NDM-5_2	Entero_mEp237	48.6	45.4
NZ_CP091814.1	10MC160002271	10MC160002271_pla_pFQ61_ST383_NDM-5_3	Aeromo_pIS4_A	48.6	46.5
NZ_CP091814.1	10MC160002271	10MC160002271_pla_pFQ61_ST383_NDM-5_4	Escher_RCS47	48.6	53.2
NZ_CP091814.1	10MC160002271	10MC160002271_pla_pFQ61_ST383_NDM-5_5	Salmon_SJ46	48.6	51.7
NZ_CP091814.1	10MC160002271	10MC160002271_pla_pFQ61_ST383_NDM-5_6	Escher_ESCO13	48.6	50.5
NZ_CP091814.1	10MC160002271	10MC160002271_pla_pFQ61_ST383_NDM-5_7	Escher_RCS47	48.6	51.9
NZ_CP091815.1	10MC160002271	10MC160002271_pla_pFQ61_ST383_OXA-48_1	Salmon_vB_SosS_Oslo	51.8	51.8
NZ_CP016923.1	11	111_chr_1	Entero_phiP27	58.6	55.2
NZ_CP016923.1	11	111_chr_2	Escher_HK639	58.6	52.9
NZ_CP016923.1	11	111_chr_4	Erwini_vB_EhrS_59	58.6	55.3
NZ_CP016922.1	11	111_pla_pIncFIB_DHQP1300920_1	Escher_RCS47	52.1	54.6
NZ_CP016922.1	11	111_pla_pIncFIB_DHQP1300920_2	Stx2_c_1717	52.1	55.9
NZ_CP016921.1	11	111_pla_pIncHI1B_DHQP1300920_1	Salmon_SJ46	47.7	55.2
NZ_CP016921.1	11	111_pla_pIncHI1B_DHQP1300920_2	Lactob_Semele	47.7	44.6
NZ_CP016921.1	11	111_pla_pIncHI1B_DHQP1300920_3	Pseudo_nickie	47.7	45.7
NZ_CP016921.1	11	111_pla_pIncHI1B_DHQP1300920_4	Escher_RCS47	47.7	49.3
NZ_CP016919.1	11	111_pla_pIncR_DHQP1300920_1	Escher_RCS47	54	54
NZ_CP016919.1	11	111_pla_pIncR_DHQP1300920_2	Escher_RCS47	54	48.8
NZ_CP030174.1	11219	11219_chr_1	Edward_GF_2	58.5	53.9
NZ_CP030174.1	11219	11219_chr_2	Klebsi_3LV2017	58.5	55.2
NZ_CP030174.1	11219	11219_chr_4	Klebsi_phiKO2	58.5	55.3
NZ_CP030174.1	11219	11219_chr_5	Klebsi_ST16_OXA48phi5.4	58.5	51.3
NZ_CP030174.1	11219	11219_chr_6	Entero_mEp237	58.5	53.8
NZ_CP030174.1	11219	11219_chr_7	Salmon_Fels_1	58.5	51.9
NZ_CP030174.1	11219	11219_chr_8	Entero_mEp235	58.5	52.7
NZ_CP030174.1	11219	11219_chr_9	Stx2_c_Stx2a_F451	58.5	52.6
NZ_CP030174.1	11219	11219_chr_10	Escher_500465_1	58.5	56.2
NZ_CP097223.1	11	112_chr_1	Erwini_vB_EhrS_59	58.6	55.3
NZ_CP097223.1	11	112_chr_3	Escher_HK639	58.6	53.6
NZ_CP097223.1	11	112_chr_4	Entero_phiP27	58.6	53.1
NZ_CP097226.1	11	112_pla_p103.7_1	Stx2_c_Stx2a_F451	52.3	56.5
NZ_CP097226.1	11	112_pla_p103.7_2	Escher_RCS47	52.3	54.4
NZ_CP097225.1	11	112_pla_p122.3_2	Escher_RCS47	51.5	52.7
NZ_CP097224.1	11	112_pla_p235.4_1	Entero_mEp237	47.6	45.8
NZ_CP097224.1	11	112_pla_p235.4_2	Escher_RCS47	47.6	50.9
NZ_CP097224.1	11	112_pla_p235.4_3	Salmon_SJ46	47.6	55.2
NZ_CP097224.1	11	112_pla_p235.4_4	Lactob_Semele	47.6	44.6
NZ_CP030315.1	11305	11305_chr_1	Klebsi_ST147_VIM1phi7.1	58.6	53.6
NZ_CP030315.1	11305	11305_chr_2	Escher_500465_1	58.6	57.5
NZ_CP030315.1	11305	11305_chr_3	Salmon_118970_sal3	58.6	51.9
NZ_CP030315.1	11305	11305_chr_4	Entero_mEp237	58.6	52.9
NZ_CP030315.1	11305	11305_chr_5	Klebsi_4LV2017	58.6	53.3
NZ_CP030315.1	11305	11305_chr_6	Escher_503458	58.6	59.1
NZ_CP030316.1	11305	11305_pla_p11305-1_2	Escher_RCS47	54.6	52.3
NZ_CP030313.1	11311	11311_chr_1	Klebsi_ST16_OXA48phi5.4	58.7	51.7
NZ_CP030313.1	11311	11311_chr_2	Klebsi_phiKO2	58.7	55.6
NZ_CP030314.1	11311	11311_pla_p11311-1_1	Salmon_SJ46	51.2	50.7
NZ_CP030314.1	11311	11311_pla_p11311-1_3	Escher_520873	51.2	51.5
NZ_CP026023.1	11420	11420_chr_1	Escher_500465_1	58.6	57.6
NZ_CP026023.1	11420	11420_chr_2	Salmon_SPN1S	58.6	55.1
NZ_CP026023.1	11420	11420_chr_3	Erwini_vB_EhrS_59	58.6	54.1
NZ_CP026023.1	11420	11420_chr_4	Mycoba_Equemioh13	58.6	58
NZ_CP026023.1	11420	11420_chr_5	Serrat_phiMAM1	58.6	48.4
NZ_CP026023.1	11420	11420_chr_6	Klebsi_phiKO2	58.6	55.3
NZ_CP026024.1	11420	11420_pla_p11420-HVKP_1	Escher_RCS47	51.3	51
NZ_CP026024.1	11420	11420_pla_p11420-HVKP_2	Escher_SH2026Stx1	51.3	53.4
NZ_CP026025.1	11420	11420_pla_p11420-KPC_1	Escher_RCS47	51.8	54.1
NZ_CP030311.1	11454	11454_chr_1	Escher_500465_1	58.7	57.5
NZ_CP030311.1	11454	11454_chr_2	Entero_phiP27	58.7	53.2
NZ_CP030311.1	11454	11454_chr_3	Pseudo_phi297	58.7	53.9
NZ_CP030311.1	11454	11454_chr_4	Salmon_118970_sal3	58.7	47.2
NZ_CP030311.1	11454	11454_chr_5	Klebsi_ST16_OXA48phi5.4	58.7	52.9
NZ_CP030312.1	11454	11454_pla_p11454-1_1	Entero_mEpX1	51.8	50.6
NZ_CP030312.1	11454	11454_pla_p11454-1_2	Escher_SH2026Stx1	51.8	53.8
NZ_CP030312.1	11454	11454_pla_p11454-1_3	Bacill_SP_15	51.8	51.4
NZ_CP026021.1	11492	11492_chr_1	Escher_500465_1	58.6	52.9
NZ_CP026021.1	11492	11492_chr_2	Salmon_SPN1S	58.6	54.9
NZ_CP026021.1	11492	11492_chr_3	Pseudo_MP1412	58.6	58
NZ_CP026021.1	11492	11492_chr_4	Lactob_LfeInf	58.6	48.4
NZ_CP026021.1	11492	11492_chr_5	Klebsi_phiKO2	58.6	55.5
NZ_CP026022.1	11492	11492_pla_p11492-CTXM_1	Escher_SH2026Stx1	51.6	53.1
NZ_CP026022.1	11492	11492_pla_p11492-CTXM_2	Klebsi_ZCKP1	51.6	50.8
NZ_CP006722.1	1158	1158_chr_1	Pseudo_vB_PaeS_PAO1_Ab18	58.4	54.4
NZ_CP006722.1	1158	1158_chr_2	Escher_500465_1	58.4	49.3
NZ_CP103654.1	1159	1159_chr_1	Clostr_phiCP7R	58.5	59.3
NZ_CP103654.1	1159	1159_chr_2	Shigel_SfIV	58.5	53.4
NZ_CP103654.1	1159	1159_chr_4	Escher_HK639	58.5	53.9
NZ_CP103654.1	1159	1159_chr_5	Salmon_118970_sal3	58.5	52
NZ_CP103654.1	1159	1159_chr_6	Entero_HK106	58.5	53.7
NZ_CP103654.1	1159	1159_chr_7	Stx2_c_Stx2a_F451	58.5	59.5
NZ_CP103655.1	1159	1159_pla_pMB5730_1_2	Sodali_phiSG1	54.2	52.7
NZ_CP103655.1	1159	1159_pla_pMB5730_1_3	Salmon_SJ46	54.2	58.9
NZ_CP089427.1	1194	1194_chr_1	Entero_SfI	58.6	54.2
NZ_CP089427.1	1194	1194_chr_2	Escher_500465_1	58.6	57.4
NZ_CP089427.1	1194	1194_chr_3	Salmon_SEN34	58.6	54.8
NZ_CP089427.1	1194	1194_chr_4	Klebsi_4LV2017	58.6	51.8
NZ_CP089427.1	1194	1194_chr_5	Entero_P4	58.6	56.3
NZ_CP089427.1	1194	1194_chr_6	Entero_P4	58.6	51.2
NZ_CP089427.1	1194	1194_chr_7	Bacill_vB_BtS_BMBtp14	58.6	59
NZ_CP089428.1	1194	1194_pla_p1194_1_1	Salmon_SJ46	49.6	55.9
NZ_CP089428.1	1194	1194_pla_p1194_1_2	Salmon_SJ46	49.6	58.5
NZ_CP089428.1	1194	1194_pla_p1194_1_3	Salmon_SJ46	49.6	55.5
NZ_CP089429.1	1194	1194_pla_p1194_2_1	Klebsi_phiKO2	52.6	51.6
NZ_CP089430.1	1194	1194_pla_p1194_3_1	Salmon_SJ46	47.4	54.3
NZ_CP089431.1	1194	1194_pla_p1194_4_1	Escher_RCS47	49.9	52.8
NZ_CP089432.1	1194	1194_pla_p1194_5_2	Escher_RCS47	50.5	51.2
NZ_CP049716.1	11KM256	11KM256_chr_1	Salmon_118970_sal3	58.5	54.2
NZ_CP049716.1	11KM256	11KM256_chr_2	Klebsi_ST147_VIM1phi7.1	58.5	54.3
NZ_CP049716.1	11KM256	11KM256_chr_3	Escher_500465_1	58.5	52.5
NZ_CP049716.1	11KM256	11KM256_chr_4	Salmon_SW9	58.5	56.2
NZ_CP049716.1	11KM256	11KM256_chr_5	Salmon_SEN34	58.5	54.8
NZ_CP049716.1	11KM256	11KM256_chr_6	Escher_RCS47	58.5	58.5
NZ_CP049716.1	11KM256	11KM256_chr_7	Escher_HK639	58.5	53.6
NZ_CP049716.1	11KM256	11KM256_chr_8	Klebsi_ST512_KPC3phi13.2	58.5	53.4
NZ_CP049716.1	11KM256	11KM256_chr_9	Entero_P4	58.5	56.3
NZ_CP049716.1	11KM256	11KM256_chr_10	Entero_P4	58.5	51.2
NZ_CP049716.1	11KM256	11KM256_chr_11	Bacill_vB_BtS_BMBtp14	58.5	59
NZ_CP049718.1	11KM256	11KM256_pla_pMBR_DHA-1_1CO_2	Entero_P1	54.8	53.3
NZ_CP049717.1	11KM256	11KM256_pla_pMBR_F_1	Escher_RCS47	53.7	60.2
NZ_CP049717.1	11KM256	11KM256_pla_pMBR_F_2	Stx2_c_Stx2a_F451	53.7	56.5
NZ_CP049717.1	11KM256	11KM256_pla_pMBR_F_3	Spirop_1_C74	53.7	55.8
NZ_CP049717.1	11KM256	11KM256_pla_pMBR_F_4	Escher_RCS47	53.7	55.5
NZ_CP031849.1	121	121_chr_1	Escher_500465_1	58.6	55.2
NZ_CP031849.1	121	121_chr_2	Ralsto_RSA1	58.6	52.9
NZ_CP031849.1	121	121_chr_3	Klebsi_ST147_VIM1phi7.1	58.6	54.3
NZ_CP031849.1	121	121_chr_4	Entero_c_1	58.6	51.7
NZ_CP031849.1	121	121_chr_5	Escher_RCS47	58.6	60.2
NZ_CP031849.1	121	121_chr_6	Entero_mEp237	58.6	52.3
NZ_CP031849.1	121	121_chr_7	Klebsi_phiKO2	58.6	54.4
NZ_CP031849.1	121	121_chr_8	Phage_Gifsy_2	58.6	46.8
NZ_CP031849.1	121	121_chr_9	Klebsi_ST512_KPC3phi13.2	58.6	53.2
NZ_CP031849.1	121	121_chr_10	Bacill_vB_BtS_BMBtp14	58.6	58.7
NZ_CP031850.1	121	121_pla_pKP121-1-mcr_1	Acinet_vB_AbaM_ME3	47.7	51.5
NZ_CP031850.1	121	121_pla_pKP121-1-mcr_3	Salmon_SJ46	47.7	54.8
NZ_CP031851.1	121	121_pla_pKP121-2_1	Cyanop_S_RIM12	54	61.8
NZ_CP031851.1	121	121_pla_pKP121-2_2	Escher_RCS47	54	54.8
NZ_CP031852.1	121	121_pla_pKP121-3_1	Escher_SH2026Stx1	52.2	55.9
NZ_CP030172.1	12208	12208_chr_1	Erwini_vB_EhrS_59	58.7	53.1
NZ_CP083070.1	1230_0791_KP	1230_0791_KP_chr_1	Klebsi_ST147_VIM1phi7.1	58.6	53.9
NZ_CP083070.1	1230_0791_KP	1230_0791_KP_chr_2	Erwini_vB_EhrS_59	58.6	54
NZ_CP083070.1	1230_0791_KP	1230_0791_KP_chr_3	Entero_mEp237	58.6	53
NZ_CP083070.1	1230_0791_KP	1230_0791_KP_chr_4	Bacill_vB_BtS_BMBtp14	58.6	59.1
NZ_CP083070.1	1230_0791_KP	1230_0791_KP_chr_5	Klebsi_phiKO2	58.6	56.8
NZ_CP083071.1	1230_0791_KP	1230_0791_KP_pla_p1-1230_0791_KP_1	Escher_Av_05	45.7	46.8
NZ_CP083071.1	1230_0791_KP	1230_0791_KP_pla_p1-1230_0791_KP_2	Pseudo_nickie	45.7	45.8
NZ_CP083073.1	1230_0791_KP	1230_0791_KP_pla_p1230-0791-KP-OXA48_1	Cronob_ENT39118	52.4	51.9
NZ_CP083072.1	1230_0791_KP	1230_0791_KP_pla_p2-1230_0791_KP_2	Staphy_SPbeta_like	52.4	52.8
NZ_CP083072.1	1230_0791_KP	1230_0791_KP_pla_p2-1230_0791_KP_3	Paenib_Yerffej	52.4	52.2
NZ_CP083072.1	1230_0791_KP	1230_0791_KP_pla_p2-1230_0791_KP_4	Escher_RCS47	52.4	51.1
NZ_CP097220.1	12	12er_chr_1	Erwini_vB_EhrS_59	58.6	55.3
NZ_CP097220.1	12	12er_chr_2	Entero_phiP27	58.6	55.2
NZ_CP097220.1	12	12er_chr_3	Escher_HK639	58.6	52.9
NZ_CP097220.1	12	12er_chr_5	Escher_500465_1	58.6	57.7
NZ_CP097221.1	12	12er_pla_p206.6_1	Escher_RCS47	51.8	54.6
NZ_CP097221.1	12	12er_pla_p206.6_2	Stx2_c_1717	51.8	55.9
NZ_CP097221.1	12	12er_pla_p206.6_3	Salmon_SJ46	51.8	49.7
NZ_CP097221.1	12	12er_pla_p206.6_4	Salmon_SJ46	51.8	51.8
NZ_CP097221.1	12	12er_pla_p206.6_6	Escher_RCS47	51.8	53.9
NZ_CP082765.1	12	12yi_chr_1	Salmon_118970_sal3	58.5	54.2
NZ_CP082765.1	12	12yi_chr_2	Escher_RCS47	58.5	52.2
NZ_CP082765.1	12	12yi_chr_3	Klebsi_ST437_OXA245phi4.1	58.5	56
NZ_CP082765.1	12	12yi_chr_4	Escher_phiV10	58.5	54.1
NZ_CP082765.1	12	12yi_chr_5	Entero_phi92	58.5	55.8
NZ_CP082765.1	12	12yi_chr_6	Salmon_SEN34	58.5	54.8
NZ_CP082765.1	12	12yi_chr_7	Escher_RCS47	58.5	55.1
NZ_CP082765.1	12	12yi_chr_8	Escher_HK639	58.5	54.7
NZ_CP082765.1	12	12yi_chr_10	Entero_c_1	58.5	50.9
NZ_CP082765.1	12	12yi_chr_11	Klebsi_ST512_KPC3phi13.2	58.5	52.4
NZ_CP082765.1	12	12yi_chr_12	Entero_P4	58.5	56.2
NZ_CP082765.1	12	12yi_chr_13	Entero_P4	58.5	53.5
NZ_CP082767.1	12	12yi_pla_pKP12-KPC_1	Salmon_SJ46	54.5	52
NZ_CP082767.1	12	12yi_pla_pKP12-KPC_2	Escher_RCS47	54.5	58.5
NZ_CP082767.1	12	12yi_pla_pKP12-KPC_3	Entero_P1	54.5	55.3
NZ_CP082766.1	12	12yi_pla_pKP12-vir_1	Escher_520873	51.3	50.2
NZ_CP082766.1	12	12yi_pla_pKP12-vir_2	Escher_RCS47	51.3	49
NZ_CP082766.1	12	12yi_pla_pKP12-vir_3	Escher_RCS47	51.3	49.1
NZ_CP082766.1	12	12yi_pla_pKP12-vir_4	Pseudo_PMBT3	51.3	50.7
NZ_CP082766.1	12	12yi_pla_pKP12-vir_5	Escher_SH2026Stx1	51.3	54.4
NZ_CP082768.1	12	12yi_pla_pKP12_4_1	Escher_RCS47	55.2	57.2
NZ_CP098355.1	13001	13001_chr_1	Salmon_ST64B	58.5	54.2
NZ_CP098355.1	13001	13001_chr_2	Klebsi_ST437_OXA245phi4.1	58.5	54.7
NZ_CP098355.1	13001	13001_chr_3	Escher_phiV10	58.5	55.2
NZ_CP098355.1	13001	13001_chr_4	Escher_RCS47	58.5	44.1
NZ_CP098355.1	13001	13001_chr_5	Salmon_SEN34	58.5	54.5
NZ_CP098355.1	13001	13001_chr_6	Escher_RCS47	58.5	58.4
NZ_CP098355.1	13001	13001_chr_7	Escher_HK639	58.5	53.7
NZ_CP098355.1	13001	13001_chr_8	Klebsi_ST512_KPC3phi13.2	58.5	52.4
NZ_CP098355.1	13001	13001_chr_9	Erwini_vB_EhrS_59	58.5	53.7
NZ_CP098355.1	13001	13001_chr_10	Entero_P4	58.5	56.3
NZ_CP098355.1	13001	13001_chr_11	Entero_P4	58.5	57.6
NZ_CP098357.1	13001	13001_pla_p13001-KPN_1	Escher_RCS47	54	60.5
NZ_CP098357.1	13001	13001_pla_p13001-KPN_2	Stx2_c_1717	54	55.2
NZ_CP098357.1	13001	13001_pla_p13001-KPN_3	Escher_RCS47	54	55.5
NZ_CP098358.1	13001	13001_pla_p13001-QIL_1	Escher_RCS47	55.1	56.6
NZ_CP098359.1	13001	13001_pla_p13001-X3_1	Escher_RCS47	48.1	49.6
NZ_CP026017.1	13190	13190_chr_1	Klebsi_ST147_VIM1phi7.1	58.6	53.8
NZ_CP026017.1	13190	13190_chr_2	Entero_mEp237	58.6	53
NZ_CP026017.1	13190	13190_chr_3	Bacill_vB_BtS_BMBtp14	58.6	59.1
NZ_CP026019.1	13190	13190_pla_p13190-1_1	Entero_mEp237	48.5	43.5
NZ_CP026019.1	13190	13190_pla_p13190-1_2	Salmon_SSU5	48.5	47.5
NZ_CP026019.1	13190	13190_pla_p13190-1_3	Escher_RCS47	48.5	57.2
NZ_CP026019.1	13190	13190_pla_p13190-1_4	Caulob_CcrColossus	48.5	51.6
NZ_CP026019.1	13190	13190_pla_p13190-1_5	Staphy_SPbeta_like	48.5	54.8
NZ_CP026018.1	13190	13190_pla_p13190-2_2	Escher_RCS47	54.9	56.3
NZ_CP097626.1	140253	140253_chr_1	Salmon_ST64B	58.5	54.2
NZ_CP097626.1	140253	140253_chr_2	Escher_RCS47	58.5	48.7
NZ_CP097626.1	140253	140253_chr_3	Klebsi_ST437_OXA245phi4.1	58.5	56
NZ_CP097626.1	140253	140253_chr_4	Escher_phiV10	58.5	54.3
NZ_CP097626.1	140253	140253_chr_5	Escher_vB_EcoM_Schickermooser	58.5	51.5
NZ_CP097626.1	140253	140253_chr_6	Salmon_SEN34	58.5	54.5
NZ_CP097626.1	140253	140253_chr_7	Salmon_vB_SosS_Oslo	58.5	55.1
NZ_CP097626.1	140253	140253_chr_8	Escher_HK639	58.5	54.5
NZ_CP097626.1	140253	140253_chr_9	Klebsi_phiKO2	58.5	55.1
NZ_CP097626.1	140253	140253_chr_11	Klebsi_3LV2017	58.5	55.2
NZ_CP097626.1	140253	140253_chr_12	Klebsi_ST512_KPC3phi13.2	58.5	53.5
NZ_CP097626.1	140253	140253_chr_13	Entero_P4	58.5	56
NZ_CP097626.1	140253	140253_chr_14	Entero_P4	58.5	54.8
NZ_CP097628.1	140253	140253_pla_p1_140253_1	Escher_RCS47	53.7	60.5
NZ_CP097628.1	140253	140253_pla_p1_140253_2	Staphy_SPbeta_like	53.7	56.3
NZ_CP097628.1	140253	140253_pla_p1_140253_3	Escher_RCS47	53.7	55
NZ_CP097627.1	140253	140253_pla_pKPC2_140253_1	Salmon_SJ46	54.1	55.4
NZ_CP097627.1	140253	140253_pla_pKPC2_140253_2	Escher_RCS47	54.1	55.2
NZ_CP097627.1	140253	140253_pla_pKPC2_140253_3	Salmon_SJ46	54.1	53.2
NZ_OW970514.1	147	14710_chr_main_1	Klebsi_ST147_VIM1phi7.1	58.5	53.8
NZ_OW970514.1	147	14710_chr_main_2	Escher_500465_1	58.5	57.5
NZ_OW970514.1	147	14710_chr_main_3	Entero_c_1	58.5	51.7
NZ_OW970514.1	147	14710_chr_main_4	Salmon_118970_sal3	58.5	52.4
NZ_OW970514.1	147	14710_chr_main_5	Bacill_vB_BtS_BMBtp14	58.5	59.1
NZ_OW970516.1	147	14710_pla_P2_1	Klebsi_phiKO2	54.2	54.4
NZ_OW970517.1	147	14710_pla_P3_1	Salmon_SJ46	53.8	54.7
NZ_OW970518.1	147	14710_pla_P4_1	Salmon_vB_SosS_Oslo	52.7	51.8
NZ_OW970530.1	147	14711_chr_main_1	Klebsi_ST147_VIM1phi7.1	58.5	53.8
NZ_OW970530.1	147	14711_chr_main_2	Entero_c_1	58.5	51.7
NZ_OW970530.1	147	14711_chr_main_3	Salmon_118970_sal3	58.5	52.4
NZ_OW970530.1	147	14711_chr_main_4	Bacill_vB_BtS_BMBtp14	58.5	59.1
NZ_OW970532.1	147	14711_pla_P2_1	Cronob_ENT39118	52.4	51.8
NZ_OW970533.1	147	14711_pla_P3_1	Klebsi_phiKO2	54.6	54.3
NZ_OW970534.1	147	14711_pla_P4_1	Entero_P1	52.5	54.6
NZ_OW970534.1	147	14711_pla_P4_2	Escher_RCS47	52.5	51.7
NZ_OW970540.1	147	14712_chr_main_1	Klebsi_ST147_VIM1phi7.1	58.5	53.8
NZ_OW970540.1	147	14712_chr_main_2	Escher_500465_1	58.5	57.5
NZ_OW970540.1	147	14712_chr_main_3	Entero_c_1	58.5	51.7
NZ_OW970540.1	147	14712_chr_main_4	Salmon_118970_sal3	58.5	52.4
NZ_OW970540.1	147	14712_chr_main_5	Bacill_vB_BtS_BMBtp14	58.5	59.1
NZ_OW970542.1	147	14712_pla_P2_1	Salmon_SJ46	54.8	52.8
NZ_OW970543.1	147	14712_pla_P3_1	Salmon_vB_SosS_Oslo	52.4	51.8
NZ_OW970544.1	147	14712_pla_P4_1	Klebsi_phiKO2	54.3	54.6
NZ_OW970553.1	147	14713_chr_main_1	Klebsi_ST147_VIM1phi7.1	58.5	53.8
NZ_OW970553.1	147	14713_chr_main_2	Entero_c_1	58.5	51.7
NZ_OW970553.1	147	14713_chr_main_3	Salmon_118970_sal3	58.5	52.4
NZ_OW970553.1	147	14713_chr_main_4	Escher_503458	58.5	59.1
NZ_OW970555.1	147	14713_pla_P2_1	Microc_MaMV_DC	53.8	54.4
NZ_OW970556.1	147	14713_pla_P3_1	Salmon_vB_SosS_Oslo	52.4	51.8
NZ_OW970557.1	147	14713_pla_P4_1	Klebsi_phiKO2	54.5	54
NZ_OW970560.1	147	14714_chr_main_1	Klebsi_ST147_VIM1phi7.1	58.5	53
NZ_OW970560.1	147	14714_chr_main_2	Entero_c_1	58.5	51.7
NZ_OW970560.1	147	14714_chr_main_3	Salmon_118970_sal3	58.5	52.4
NZ_OW970562.1	147	14714_pla_P2_2	Escher_RCS47	53.5	53.8
NZ_OW970563.1	147	14714_pla_P3_1	Salmon_vB_SosS_Oslo	52.4	51.8
NZ_OW970564.1	147	14714_pla_P4_1	Klebsi_phiKO2	54.2	54.3
NZ_OW970357.1	147	1471_chr_main_1	Klebsi_ST147_VIM1phi7.1	58.5	53.8
NZ_OW970357.1	147	1471_chr_main_2	Escher_500465_1	58.5	57.5
NZ_OW970357.1	147	1471_chr_main_3	Entero_c_1	58.5	51.7
NZ_OW970357.1	147	1471_chr_main_4	Salmon_118970_sal3	58.5	52.4
NZ_OW970357.1	147	1471_chr_main_5	Escher_503458	58.5	59.1
NZ_OW970359.1	147	1471_pla_P2_2	Escher_RCS47	53.4	53.8
NZ_OW970360.1	147	1471_pla_P3_1	Cronob_ENT39118	52.4	51.8
NZ_OW970361.1	147	1471_pla_P4_1	Klebsi_phiKO2	54.2	54.6
NZ_OW970365.1	147	1472_chr_main_1	Klebsi_ST147_VIM1phi7.1	58.5	53.8
NZ_OW970365.1	147	1472_chr_main_2	Entero_c_1	58.5	51.7
NZ_OW970365.1	147	1472_chr_main_3	Salmon_118970_sal3	58.5	52.4
NZ_OW970365.1	147	1472_chr_main_4	Escher_503458	58.5	59.1
NZ_OW970367.1	147	1472_pla_P2_1	Salmon_SJ46	53.7	52.9
NZ_OW970368.1	147	1472_pla_P3_1	Salmon_vB_SosS_Oslo	52.4	51.8
NZ_OW970369.1	147	1472_pla_P4_1	Klebsi_phiKO2	54.1	54.4
NZ_OW970413.1	147	1473_chr_main_1	Klebsi_ST147_VIM1phi7.1	58.5	53.8
NZ_OW970413.1	147	1473_chr_main_2	Escher_500465_1	58.5	57.5
NZ_OW970413.1	147	1473_chr_main_3	Entero_c_1	58.5	51.7
NZ_OW970413.1	147	1473_chr_main_4	Salmon_118970_sal3	58.5	52.4
NZ_OW970415.1	147	1473_pla_P2_1	Salmon_SJ46	54.7	52.8
NZ_OW970415.1	147	1473_pla_P2_2	Staphy_SPbeta_like	54.7	53.2
NZ_OW970416.1	147	1473_pla_P3_1	Cronob_ENT39118	52.4	51.8
NZ_OW970417.1	147	1473_pla_P4_1	Klebsi_phiKO2	54.2	52.9
NZ_OW970422.1	147	1474_chr_main_1	Klebsi_ST147_VIM1phi7.1	58.5	53.8
NZ_OW970422.1	147	1474_chr_main_2	Escher_500465_1	58.5	57.5
NZ_OW970422.1	147	1474_chr_main_3	Entero_c_1	58.5	51.7
NZ_OW970422.1	147	1474_chr_main_4	Salmon_118970_sal3	58.5	52.4
NZ_OW970422.1	147	1474_chr_main_5	Escher_503458	58.5	59.1
NZ_OW970424.1	147	1474_pla_P2_1	Cronob_ENT39118	52.4	51.8
NZ_OW970425.1	147	1474_pla_P3_1	Klebsi_phiKO2	54.3	54.7
NZ_OW970436.1	147	1475_chr_main_1	Klebsi_ST147_VIM1phi7.1	58.5	53
NZ_OW970436.1	147	1475_chr_main_2	Entero_c_1	58.5	51.7
NZ_OW970436.1	147	1475_chr_main_3	Salmon_118970_sal3	58.5	52.4
NZ_OW970436.1	147	1475_chr_main_4	Bacill_vB_BtS_BMBtp14	58.5	59.1
NZ_OW970438.1	147	1475_pla_P2_2	Burkho_KL3	53.8	53.4
NZ_OW970438.1	147	1475_pla_P2_3	Salmon_SJ46	53.8	53.1
NZ_OW970439.1	147	1475_pla_P3_1	Salmon_vB_SosS_Oslo	52.4	51.8
NZ_OW970440.1	147	1475_pla_P4_1	Klebsi_phiKO2	54.5	52.9
NZ_OW970452.1	147	1476_chr_main_1	Klebsi_ST147_VIM1phi7.1	58.5	53.8
NZ_OW970452.1	147	1476_chr_main_2	Entero_c_1	58.5	51.7
NZ_OW970452.1	147	1476_chr_main_3	Salmon_118970_sal3	58.5	52.4
NZ_OW970452.1	147	1476_chr_main_4	Escher_503458	58.5	59.1
NZ_OW970453.1	147	1476_pla_P1_1	Escher_RCS47	53.6	53
NZ_OW970454.1	147	1476_pla_P2_1	Salmon_vB_SosS_Oslo	52.4	51.8
NZ_OW970454.1	147	1476_pla_P2_2	Escher_503458	52.4	55.7
NZ_OW970455.1	147	1476_pla_P3_1	Salmon_SJ46	55.6	54
NZ_OW970456.1	147	1476_pla_P4_1	Klebsi_phiKO2	54.2	54.4
NZ_OW970478.1	147	1477_chr_main_1	Klebsi_ST147_VIM1phi7.1	58.5	53.8
NZ_OW970478.1	147	1477_chr_main_2	Entero_c_1	58.5	51.7
NZ_OW970478.1	147	1477_chr_main_3	Salmon_118970_sal3	58.5	52.4
NZ_OW970478.1	147	1477_chr_main_4	Escher_503458	58.5	59.1
NZ_OW970480.1	147	1477_pla_P2_1	Klebsi_phiKO2	54.2	54.4
NZ_OW970481.1	147	1477_pla_P3_1	Escher_RCS47	53.8	54.3
NZ_OW970482.1	147	1477_pla_P4_1	Salmon_vB_SosS_Oslo	52.7	51.8
NZ_OW970486.1	147	1478_chr_main_1	Klebsi_ST147_VIM1phi7.1	58.4	53.8
NZ_OW970486.1	147	1478_chr_main_2	Entero_c_1	58.4	51.7
NZ_OW970486.1	147	1478_chr_main_3	Salmon_118970_sal3	58.4	52.4
NZ_OW970486.1	147	1478_chr_main_4	Microc_MaMV_DC	58.4	52.6
NZ_OW970486.1	147	1478_chr_main_5	Entero_mEp237	58.4	52.5
NZ_OW970488.1	147	1478_pla_P2_1	Escher_RCS47	53.6	54.6
NZ_OW970489.1	147	1478_pla_P3_1	Klebsi_phiKO2	54.3	54.6
NZ_OW970492.1	147	1479_chr_main_1	Klebsi_ST147_VIM1phi7.1	58.5	53.8
NZ_OW970492.1	147	1479_chr_main_2	Escher_500465_1	58.5	57.5
NZ_OW970492.1	147	1479_chr_main_3	Entero_c_1	58.5	51.7
NZ_OW970492.1	147	1479_chr_main_4	Salmon_118970_sal3	58.5	52.4
NZ_OW970494.1	147	1479_pla_P2_1	Staphy_SPbeta_like	54.8	54.4
NZ_OW970494.1	147	1479_pla_P2_2	Escher_RCS47	54.8	53.3
NZ_OW970495.1	147	1479_pla_P3_1	Cronob_ENT39118	52.4	51.8
NZ_OW970496.1	147	1479_pla_P4_1	Klebsi_phiKO2	54.2	54.3
NZ_CP103582.1	1498	1498_chr_1	Escher_500465_1	58.6	47.9
NZ_CP103582.1	1498	1498_chr_2	Escher_HK639	58.6	53.9
NZ_CP103582.1	1498	1498_chr_3	Entero_c_1	58.6	54.9
NZ_CP103582.1	1498	1498_chr_4	Entero_mEp235	58.6	52.5
NZ_CP103582.1	1498	1498_chr_5	Entero_Tyrion	58.6	49.3
NZ_CP103582.1	1498	1498_chr_6	Entero_P4	58.6	55.1
NZ_CP103582.1	1498	1498_chr_7	Escher_503458	58.6	59.2
NZ_CP103583.1	1498	1498_pla_pMB7868_1_1	Salmon_SJ46	53.1	54.1
NZ_CP103583.1	1498	1498_pla_pMB7868_1_3	Escher_RCS47	53.1	54.5
NZ_CP103584.1	1498	1498_pla_pMB7868_2_1	Salmon_SSU5	49.7	49.7
NZ_CP104030.1	150040X0B1	150040X0B1_chr_1	Salmon_ST64B	58.5	54.2
NZ_CP104030.1	150040X0B1	150040X0B1_chr_2	Entero_P1	58.5	57.3
NZ_CP104030.1	150040X0B1	150040X0B1_chr_3	Escher_RCS47	58.5	48.7
NZ_CP104030.1	150040X0B1	150040X0B1_chr_4	Klebsi_ST437_OXA245phi4.1	58.5	56
NZ_CP104030.1	150040X0B1	150040X0B1_chr_5	Escher_phiV10	58.5	54.3
NZ_CP104030.1	150040X0B1	150040X0B1_chr_6	Entero_phi92	58.5	51.5
NZ_CP104030.1	150040X0B1	150040X0B1_chr_7	Salmon_SEN34	58.5	54.5
NZ_CP104030.1	150040X0B1	150040X0B1_chr_8	Escher_RCS47	58.5	55.1
NZ_CP104030.1	150040X0B1	150040X0B1_chr_9	Klebsi_phiKO2	58.5	55.1
NZ_CP104030.1	150040X0B1	150040X0B1_chr_10	Klebsi_3LV2017	58.5	55.2
NZ_CP104030.1	150040X0B1	150040X0B1_chr_11	Klebsi_ST512_KPC3phi13.2	58.5	53.5
NZ_CP104030.1	150040X0B1	150040X0B1_chr_12	Entero_P4	58.5	56.2
NZ_CP104030.1	150040X0B1	150040X0B1_chr_13	Entero_P4	58.5	54.8
NZ_CP104031.1	150040X0B1	150040X0B1_pla_pCTXM65_150040X0B1_1	Escher_RCS47	54	55.5
NZ_CP104031.1	150040X0B1	150040X0B1_pla_pCTXM65_150040X0B1_2	Salmon_SJ46	54	52.8
NZ_CP104031.1	150040X0B1	150040X0B1_pla_pCTXM65_150040X0B1_3	Escher_RCS47	54	55.8
NZ_CP104032.1	150040X0B1	150040X0B1_pla_pVir_150040X0B1_1	Entero_BP_4795	51.9	48.6
NZ_CP104032.1	150040X0B1	150040X0B1_pla_pVir_150040X0B1_2	Shigel_SfIV	51.9	49
NZ_CP104032.1	150040X0B1	150040X0B1_pla_pVir_150040X0B1_3	Escher_SH2026Stx1	51.9	49.5
NZ_CP104032.1	150040X0B1	150040X0B1_pla_pVir_150040X0B1_4	Salmon_SJ46	51.9	56.8
NZ_CP101726.1	150040X1B1	150040X1B1_chr_1	Salmon_ST64B	58.5	54.2
NZ_CP101726.1	150040X1B1	150040X1B1_chr_2	Entero_P1	58.5	57.3
NZ_CP101726.1	150040X1B1	150040X1B1_chr_3	Escher_RCS47	58.5	48.7
NZ_CP101726.1	150040X1B1	150040X1B1_chr_4	Klebsi_ST437_OXA245phi4.1	58.5	56
NZ_CP101726.1	150040X1B1	150040X1B1_chr_5	Escher_phiV10	58.5	54.3
NZ_CP101726.1	150040X1B1	150040X1B1_chr_6	Salmon_SJ46	58.5	46.9
NZ_CP101726.1	150040X1B1	150040X1B1_chr_7	Escher_phAPEC8	58.5	51.5
NZ_CP101726.1	150040X1B1	150040X1B1_chr_8	Salmon_SEN34	58.5	54.5
NZ_CP101726.1	150040X1B1	150040X1B1_chr_9	Salmon_vB_SosS_Oslo	58.5	55.1
NZ_CP101726.1	150040X1B1	150040X1B1_chr_10	Klebsi_phiKO2	58.5	55.1
NZ_CP101726.1	150040X1B1	150040X1B1_chr_11	Klebsi_3LV2017	58.5	55.2
NZ_CP101726.1	150040X1B1	150040X1B1_chr_12	Klebsi_ST512_KPC3phi13.2	58.5	53.5
NZ_CP101726.1	150040X1B1	150040X1B1_chr_13	Entero_P4	58.5	56.2
NZ_CP101726.1	150040X1B1	150040X1B1_chr_14	Entero_P4	58.5	54.8
NZ_CP101727.1	150040X1B1	150040X1B1_pla_pCTXM65_150040X1B1_1	Salmon_SJ46	54.1	55.5
NZ_CP101727.1	150040X1B1	150040X1B1_pla_pCTXM65_150040X1B1_2	Salmon_SJ46	54.1	51.9
NZ_CP101727.1	150040X1B1	150040X1B1_pla_pCTXM65_150040X1B1_3	Escher_RCS47	54.1	55.8
NZ_CP101728.1	150040X1B1	150040X1B1_pla_pVir_150040X1B1_1	Stx2_II	51.9	48.6
NZ_CP101728.1	150040X1B1	150040X1B1_pla_pVir_150040X1B1_2	Entero_HK630	51.9	49
NZ_CP101728.1	150040X1B1	150040X1B1_pla_pVir_150040X1B1_3	Stx2_c_Stx2a_F451	51.9	49.5
NZ_CP101728.1	150040X1B1	150040X1B1_pla_pVir_150040X1B1_4	Escher_RCS47	51.9	56.8
NZ_CP047648.1	156070	156070_chr_1	Entero_SfI	58.5	54.2
NZ_CP047648.1	156070	156070_chr_2	Klebsi_ST437_OXA245phi4.1	58.5	56
NZ_CP047648.1	156070	156070_chr_3	Entero_P4	58.5	53.7
NZ_CP047648.1	156070	156070_chr_4	Klebsi_ST512_KPC3phi13.2	58.5	52.4
NZ_CP047648.1	156070	156070_chr_6	Klebsi_phiKO2	58.5	55.4
NZ_CP047648.1	156070	156070_chr_7	Salmon_SEN34	58.5	52.7
NZ_CP047648.1	156070	156070_chr_8	Pectob_ZF40	58.5	53.1
NZ_CP047648.1	156070	156070_chr_9	Escher_vB_EcoM_Schickermooser	58.5	49.6
NZ_CP047648.1	156070	156070_chr_10	Salmon_SPN1S	58.5	52.6
NZ_CP047648.1	156070	156070_chr_11	Entero_P4	58.5	52.4
NZ_CP047648.1	156070	156070_chr_12	Escher_503458	58.5	59
NZ_CP047649.1	158590	158590_chr_1	Entero_SfI	58.5	54.2
NZ_CP047649.1	158590	158590_chr_2	Klebsi_ST437_OXA245phi4.1	58.5	56
NZ_CP047649.1	158590	158590_chr_3	Escher_phiV10	58.5	52.5
NZ_CP047649.1	158590	158590_chr_4	Escher_phAPEC8	58.5	51.6
NZ_CP047649.1	158590	158590_chr_5	Pectob_ZF40	58.5	53
NZ_CP047649.1	158590	158590_chr_6	Salmon_SEN34	58.5	54.5
NZ_CP047649.1	158590	158590_chr_7	Escher_HK639	58.5	54.1
NZ_CP047649.1	158590	158590_chr_8	Klebsi_phiKO2	58.5	55.1
NZ_CP047649.1	158590	158590_chr_10	Klebsi_ST512_KPC3phi13.2	58.5	52.4
NZ_CP047649.1	158590	158590_chr_11	Entero_P4	58.5	56.2
NZ_CP047649.1	158590	158590_chr_12	Entero_P4	58.5	54.8
NZ_CP029689.1	160111	160111_chr_1	Escher_ESCO5	58.5	52
NZ_CP029689.1	160111	160111_chr_2	Escher_phiV10	58.5	54.3
NZ_CP029689.1	160111	160111_chr_3	Klebsi_ST437_OXA245phi4.1	58.5	55.5
NZ_CP029689.1	160111	160111_chr_4	Entero_SfI	58.5	54.2
NZ_CP029689.1	160111	160111_chr_5	Entero_P4	58.5	51.6
NZ_CP029689.1	160111	160111_chr_6	Entero_P4	58.5	53.7
NZ_CP029689.1	160111	160111_chr_7	Klebsi_ST512_KPC3phi13.2	58.5	52.3
NZ_CP029689.1	160111	160111_chr_9	Klebsi_phiKO2	58.5	55.3
NZ_CP029689.1	160111	160111_chr_10	Escher_HK639	58.5	54.4
NZ_CP029689.1	160111	160111_chr_11	Salmon_SEN34	58.5	52.8
NZ_CP030132.1	160111	160111_pla_pIncAC2_L111_1	Escher_RCS47	53.4	58.6
NZ_CP030132.1	160111	160111_pla_pIncAC2_L111_2	Staphy_SPbeta_like	53.4	52.3
NZ_CP030133.1	160111	160111_pla_pIncFII_L111_1	Escher_RCS47	55.5	55.5
NZ_CP030134.1	160111	160111_pla_pKPC2_L111_1	Salmon_SJ46	56.6	56.4
NZ_CP030134.1	160111	160111_pla_pKPC2_L111_2	Escher_RCS47	56.6	56.5
NZ_CP030135.1	160111	160111_pla_pOXA48_L111_1	Cronob_ENT39118	52.6	53.4
NZ_CP083066.1	1613015451	1613015451_chr_1	Entero_P4	58.6	50.4
NZ_CP083066.1	1613015451	1613015451_chr_2	Escher_500465_1	58.6	56.4
NZ_CP083066.1	1613015451	1613015451_chr_3	Edward_GF_2	58.6	54.9
NZ_CP083066.1	1613015451	1613015451_chr_4	Bacill_G	58.6	59.9
NZ_CP083066.1	1613015451	1613015451_chr_5	Entero_P1	58.6	53.5
NZ_CP083066.1	1613015451	1613015451_chr_6	Ralsto_RSY1	58.6	47.5
NZ_CP083066.1	1613015451	1613015451_chr_7	Salmon_SEN34	58.6	51.8
NZ_CP083066.1	1613015451	1613015451_chr_8	Klebsi_ST16_OXA48phi5.4	58.6	51.9
NZ_CP083066.1	1613015451	1613015451_chr_9	Klebsi_4LV2017	58.6	52.3
NZ_CP083066.1	1613015451	1613015451_chr_10	Escher_RCS47	58.6	54.1
NZ_CP083067.1	1613015451	1613015451_pla_p1-1613015451_1	Stx2_c_Stx2a_F451	53	55.3
NZ_CP083067.1	1613015451	1613015451_pla_p1-1613015451_2	Escher_SH2026Stx1	53	53.8
NZ_CP083067.1	1613015451	1613015451_pla_p1-1613015451_3	Escher_RCS47	53	51.3
NZ_CP083068.1	1613015451	1613015451_pla_p2-1613015451-OXA48_1	Salmon_vB_SosS_Oslo	52.4	51.9
NZ_CP083069.1	1613015451	1613015451_pla_p3-1613015451_1	Escher_RCS47	53.5	55.3
NZ_CP083063.1	1613163991	1613163991_chr_1	Klebsi_ST13_OXA48phi12.1	58.6	55
NZ_CP083063.1	1613163991	1613163991_chr_2	Escher_ESCO5	58.6	51.7
NZ_CP083063.1	1613163991	1613163991_chr_3	Escher_HK639	58.6	53.6
NZ_CP083063.1	1613163991	1613163991_chr_5	Klebsi_ST16_OXA48phi5.4	58.6	51.9
NZ_CP083063.1	1613163991	1613163991_chr_6	Klebsi_3LV2017	58.6	56.5
NZ_CP083064.1	1613163991	1613163991_pla_p1-1613163991-OXA48_1	Cronob_ENT39118	52.4	51.8
NZ_CP083055.1	1613258639	1613258639_chr_1	Entero_P4	58.4	49.6
NZ_CP083055.1	1613258639	1613258639_chr_2	Escher_500465_1	58.4	57.4
NZ_CP083055.1	1613258639	1613258639_chr_3	Salmon_SEN34	58.4	54.6
NZ_CP083055.1	1613258639	1613258639_chr_4	Entero_c_1	58.4	51.2
NZ_CP083055.1	1613258639	1613258639_chr_5	Salmon_SEN8	58.4	49.3
NZ_CP083055.1	1613258639	1613258639_chr_6	Salmon_SEN34	58.4	54
NZ_CP083055.1	1613258639	1613258639_chr_7	Salmon_SJ46	58.4	47.2
NZ_CP083056.1	1613258639	1613258639_pla_p1-1613258639_1	Klebsi_phiKO2	53.5	53.3
NZ_CP083056.1	1613258639	1613258639_pla_p1-1613258639_2	Staphy_SPbeta_like	53.5	52.8
NZ_CP083056.1	1613258639	1613258639_pla_p1-1613258639_3	Entero_P1	53.5	55.4
NZ_CP083056.1	1613258639	1613258639_pla_p1-1613258639_4	Klebsi_phiKO2	53.5	52.8
NZ_CP083057.1	1613258639	1613258639_pla_p2-1613258639_1	Salmon_SJ46	54	57.4
NZ_CP084497.1	1632	1632_chr_1	Entero_SfI	58.5	54.2
NZ_CP084497.1	1632	1632_chr_2	Klebsi_ST437_OXA245phi4.1	58.5	56
NZ_CP084497.1	1632	1632_chr_3	Escher_phiV10	58.5	54.3
NZ_CP084497.1	1632	1632_chr_4	Entero_phi92	58.5	51.6
NZ_CP084497.1	1632	1632_chr_5	Edward_GF_2	58.5	54.3
NZ_CP084497.1	1632	1632_chr_6	Salmon_SEN34	58.5	54.8
NZ_CP084497.1	1632	1632_chr_7	Cronob_ENT39118	58.5	55.1
NZ_CP084497.1	1632	1632_chr_8	Escher_HK639	58.5	54.7
NZ_CP084497.1	1632	1632_chr_9	Klebsi_phiKO2	58.5	55.1
NZ_CP084497.1	1632	1632_chr_10	Klebsi_ST512_KPC3phi13.2	58.5	52.6
NZ_CP084497.1	1632	1632_chr_11	Entero_P4	58.5	56.2
NZ_CP084497.1	1632	1632_chr_12	Entero_P4	58.5	53.5
NZ_CP084498.1	1632	1632_pla_p1632-1_1	Escher_RCS47	55	51.5
NZ_CP084498.1	1632	1632_pla_p1632-1_2	Escher_RCS47	55	56.5
NZ_CP084498.1	1632	1632_pla_p1632-1_3	Escher_RCS47	55	55.3
NZ_CP084499.1	1632	1632_pla_p1632-2_1	Stx2_c_Stx2a_F451	52.4	55.2
NZ_CP051161.1	16BU137	16BU137_chr_1	Escher_500465_1	58.6	52.6
NZ_CP051161.1	16BU137	16BU137_chr_2	Microc_MaMV_DC	58.6	49.6
NZ_CP051161.1	16BU137	16BU137_chr_3	Entero_mEp237	58.6	53.7
NZ_CP051161.1	16BU137	16BU137_chr_4	Klebsi_ST16_OXA48phi5.4	58.6	51.7
NZ_CP051161.1	16BU137	16BU137_chr_5	Klebsi_phiKO2	58.6	54.8
NZ_CP051161.1	16BU137	16BU137_chr_6	Klebsi_ST512_KPC3phi13.2	58.6	52.2
NZ_CP051161.1	16BU137	16BU137_chr_7	Entero_P4	58.6	45.7
NZ_CP045263.1	16HN-263	16HN-263_chr_1	Salmon_ST64B	58.3	54.2
NZ_CP045263.1	16HN-263	16HN-263_chr_2	Klebsi_ST437_OXA245phi4.1	58.3	56
NZ_CP045263.1	16HN-263	16HN-263_chr_3	Salmon_118970_sal3	58.3	52.2
NZ_CP045263.1	16HN-263	16HN-263_chr_4	Escher_phiV10	58.3	53.9
NZ_CP045263.1	16HN-263	16HN-263_chr_5	Entero_phi92	58.3	51.8
NZ_CP045263.1	16HN-263	16HN-263_chr_6	Salmon_SEN34	58.3	54.5
NZ_CP045263.1	16HN-263	16HN-263_chr_7	Entero_P1	58.3	55.2
NZ_CP045263.1	16HN-263	16HN-263_chr_8	Escher_HK639	58.3	54.9
NZ_CP045263.1	16HN-263	16HN-263_chr_9	Klebsi_phiKO2	58.3	55.2
NZ_CP045263.1	16HN-263	16HN-263_chr_10	Klebsi_ST512_KPC3phi13.2	58.3	52.4
NZ_CP045263.1	16HN-263	16HN-263_chr_11	Entero_P4	58.3	56.2
NZ_CP045263.1	16HN-263	16HN-263_chr_12	Entero_P4	58.3	51.7
NZ_CP045264.1	16HN-263	16HN-263_pla_p16HN-263_KPC_1	Salmon_SJ46	55.6	52.2
NZ_CP045264.1	16HN-263	16HN-263_pla_p16HN-263_KPC_2	Escher_RCS47	55.6	60.5
NZ_CP045264.1	16HN-263	16HN-263_pla_p16HN-263_KPC_3	Entero_P1	55.6	56.1
NZ_CP045264.1	16HN-263	16HN-263_pla_p16HN-263_KPC_4	Escher_RCS47	55.6	56
NZ_CP027036.1	16_GR_13	16_GR_13_chr_1	Entero_SfI	58.4	54.1
NZ_CP027036.1	16_GR_13	16_GR_13_chr_2	Entero_P4	58.4	51.4
NZ_CP027036.1	16_GR_13	16_GR_13_chr_3	Entero_P4	58.4	53.6
NZ_CP027036.1	16_GR_13	16_GR_13_chr_4	Erwini_vB_EhrS_59	58.4	53.8
NZ_CP027036.1	16_GR_13	16_GR_13_chr_5	Klebsi_4LV2017	58.4	52.4
NZ_CP027036.1	16_GR_13	16_GR_13_chr_6	Salmon_SEN34	58.4	52.8
NZ_CP027036.1	16_GR_13	16_GR_13_chr_7	Escher_500465_1	58.4	57.6
NZ_CP027038.1	16_GR_13	16_GR_13_pla_IncAC2_1	Escher_RCS47	53.1	51.1
NZ_CP027037.1	16_GR_13	16_GR_13_pla_IncFIB_IncFII_1	Escher_RCS47	53.7	56.3
NZ_CP027037.1	16_GR_13	16_GR_13_pla_IncFIB_IncFII_2	Escher_RCS47	53.7	60
NZ_CP027037.1	16_GR_13	16_GR_13_pla_IncFIB_IncFII_3	Escher_RCS47	53.7	54.4
NZ_CP027039.1	16_GR_13	16_GR_13_pla_IncLM_1	Cronob_ENT39118	52.4	51.8
NZ_CP019219.1	1756	1756_chr_1	Escher_500465_1	58.7	50.9
NZ_CP019219.1	1756	1756_chr_2	Entero_c_1	58.7	51
NZ_CP019219.1	1756	1756_chr_3	Pseudo_phiPSA1	58.7	53.6
NZ_CP019220.1	1756	1756_pla_pKp1756_1	Pseudo_phiPSA1	53.9	57.6
NZ_CP019220.1	1756	1756_pla_pKp1756_3	Escher_RCS47	53.9	57.5
NZ_CP041927.1	18-2374	18-2374_chr_1	Entero_HK140	58.7	51.2
NZ_CP041927.1	18-2374	18-2374_chr_2	Escher_500465_1	58.7	52.5
NZ_CP041927.1	18-2374	18-2374_chr_3	Erwini_vB_EhrS_59	58.7	52.6
NZ_CP041927.1	18-2374	18-2374_chr_4	Klebsi_ST16_OXA48phi5.4	58.7	51.4
NZ_CP041927.1	18-2374	18-2374_chr_5	Salmon_SEN34	58.7	55.4
NZ_CP041927.1	18-2374	18-2374_chr_6	Entero_HK140	58.7	53.4
NZ_CP041928.1	18-2374	18-2374_pla_pSECR18-2374A_1	Escher_RCS47	53.6	55.9
NZ_CP041928.1	18-2374	18-2374_pla_pSECR18-2374A_3	Escher_RCS47	53.6	53.7
NZ_CP041929.1	18-2374	18-2374_pla_pSECR18-2374B_1	Salmon_SSU5	50.1	50.1
NZ_CP041930.1	18-2374	18-2374_pla_pSECR18-2374C_2	Salmon_SJ46	55.2	58
NZ_CP041930.1	18-2374	18-2374_pla_pSECR18-2374C_3	Salmon_vB_SosS_Oslo	55.2	58.1
NZ_CP041931.1	18-2374	18-2374_pla_pSECR18-2374D_1	Escher_RCS47	47.6	47.6
NZ_CP084492.1	1864	1864_chr_1	Entero_SfI	58.5	54.2
NZ_CP084492.1	1864	1864_chr_2	Escher_RCS47	58.5	48.7
NZ_CP084492.1	1864	1864_chr_3	Klebsi_ST437_OXA245phi4.1	58.5	56
NZ_CP084492.1	1864	1864_chr_4	Escher_phiV10	58.5	55.4
NZ_CP084492.1	1864	1864_chr_5	Entero_phi92	58.5	51.6
NZ_CP084492.1	1864	1864_chr_6	Salmon_SEN34	58.5	54.5
NZ_CP084492.1	1864	1864_chr_7	Cronob_ENT39118	58.5	55.1
NZ_CP084492.1	1864	1864_chr_8	Escher_HK639	58.5	54.7
NZ_CP084492.1	1864	1864_chr_9	Klebsi_phiKO2	58.5	55.1
NZ_CP084492.1	1864	1864_chr_10	Klebsi_ST512_KPC3phi13.2	58.5	52.4
NZ_CP084492.1	1864	1864_chr_11	Entero_P4	58.5	56.2
NZ_CP084492.1	1864	1864_chr_12	Entero_P4	58.5	52.4
NZ_CP084492.1	1864	1864_chr_13	Bacill_vB_BtS_BMBtp14	58.5	59
NZ_CP084493.1	1864	1864_pla_p1864-1_1	Bacill_Shanette	48.7	50.7
NZ_CP084493.1	1864	1864_pla_p1864-1_2	Escher_RCS47	48.7	44.5
NZ_CP084493.1	1864	1864_pla_p1864-1_3	Shigel_Sf6	48.7	46.7
NZ_CP084494.1	1864	1864_pla_p1864-2_1	Escher_RCS47	55.7	52.2
NZ_CP084494.1	1864	1864_pla_p1864-2_2	Escher_RCS47	55.7	60.2
NZ_CP084494.1	1864	1864_pla_p1864-2_3	Entero_P1	55.7	55.3
NZ_CP084494.1	1864	1864_pla_p1864-2_4	Escher_RCS47	55.7	56.3
NZ_CP034778.1	18CPO060	18CPO060_chr_1	Escher_500465_1	58.6	57.5
NZ_CP034778.1	18CPO060	18CPO060_chr_2	Entero_phiP27	58.6	53.2
NZ_CP034778.1	18CPO060	18CPO060_chr_3	Entero_HK140	58.6	51.5
NZ_CP034778.1	18CPO060	18CPO060_chr_4	Salmon_118970_sal3	58.6	53.9
NZ_CP034776.1	18CPO060	18CPO060_pla_phvKP060_1	Escher_SH2026Stx1	51.6	53.7
NZ_CP034776.1	18CPO060	18CPO060_pla_phvKP060_2	Escher_phAPEC8	51.6	50.7
NZ_CP034777.1	18CPO060	18CPO060_pla_pKPCKP060_1	Salmon_SJ46	54.5	60.6
NZ_CP034777.1	18CPO060	18CPO060_pla_pKPCKP060_2	Stx2_c_Stx2a_F451	54.5	55.5
NZ_CP039936.1	18KM1950	18KM1950_chr_1	Shigel_SfIV	58.5	54.2
NZ_CP039936.1	18KM1950	18KM1950_chr_2	Escher_500465_1	58.5	57.4
NZ_CP039936.1	18KM1950	18KM1950_chr_3	Salmon_SEN34	58.5	54.1
NZ_CP039936.1	18KM1950	18KM1950_chr_4	Salmon_SEN34	58.5	54.8
NZ_CP039936.1	18KM1950	18KM1950_chr_5	Cronob_ENT39118	58.5	58.5
NZ_CP039936.1	18KM1950	18KM1950_chr_6	Escher_HK639	58.5	53.6
NZ_CP039936.1	18KM1950	18KM1950_chr_7	Klebsi_ST512_KPC3phi13.2	58.5	53.4
NZ_CP039936.1	18KM1950	18KM1950_chr_8	Entero_P4	58.5	56.3
NZ_CP039937.1	18KM1950	18KM1950_pla_pMBR_DHA-1_1C_18KM1950_1	Salmon_SJ46	55	53.9
NZ_CP039938.1	18KM1950	18KM1950_pla_pMBR_OXA-48_18KM1950_1	Cronob_ENT39118	52.4	51.8
NZ_CP039951.1	18KM2445b	18KM2445b_chr_1	Salmon_SEN34	58.6	53.8
NZ_CP039951.1	18KM2445b	18KM2445b_chr_2	Synech_S_CBS3	58.6	59.3
NZ_CP039951.1	18KM2445b	18KM2445b_chr_4	Escher_500465_1	58.6	53.2
NZ_CP039951.1	18KM2445b	18KM2445b_chr_5	Salmon_118970_sal3	58.6	51.6
NZ_CP039951.1	18KM2445b	18KM2445b_chr_6	Erwini_vB_EhrS_59	58.6	55.8
NZ_CP039952.1	18KM2445b	18KM2445b_pla_pMBR_CTX-M-15_18KM2445b_1	Escher_RCS47	53.2	54.3
NZ_CP039952.1	18KM2445b	18KM2445b_pla_pMBR_CTX-M-15_18KM2445b_2	Escher_RCS47	53.2	51.1
NZ_CP039953.1	18KM2445b	18KM2445b_pla_pMBR_OXA-48_18KM2445b_1	Cronob_ENT39118	52.4	51.8
NZ_CP039939.1	18KM2517	18KM2517_chr_1	Salmon_ST64B	58.5	54.2
NZ_CP039939.1	18KM2517	18KM2517_chr_2	Escher_500465_1	58.5	57.4
NZ_CP039939.1	18KM2517	18KM2517_chr_3	Salmon_SEN34	58.5	54.1
NZ_CP039939.1	18KM2517	18KM2517_chr_4	Salmon_SEN34	58.5	54.8
NZ_CP039939.1	18KM2517	18KM2517_chr_5	Bacill_SPbeta	58.5	58.5
NZ_CP039939.1	18KM2517	18KM2517_chr_6	Escher_HK639	58.5	53.6
NZ_CP039939.1	18KM2517	18KM2517_chr_7	Klebsi_ST512_KPC3phi13.2	58.5	53.4
NZ_CP039939.1	18KM2517	18KM2517_chr_8	Entero_P4	58.5	56.3
NZ_CP039940.1	18KM2517	18KM2517_pla_pMBR_DHA-1_1CV2_18KM2517_2	Entero_P1	55.1	54
NZ_CP039941.1	18KM2517	18KM2517_pla_pMBR_OXA-48_18KM2517_1	Salmon_vB_SosS_Oslo	52.4	51.8
NZ_CP039942.1	18KM2813	18KM2813_chr_1	Salmon_ST64B	58.5	54.2
NZ_CP039942.1	18KM2813	18KM2813_chr_2	Escher_500465_1	58.5	57.4
NZ_CP039942.1	18KM2813	18KM2813_chr_3	Salmon_SEN34	58.5	54.1
NZ_CP039942.1	18KM2813	18KM2813_chr_4	Salmon_SEN34	58.5	54.8
NZ_CP039942.1	18KM2813	18KM2813_chr_5	Staphy_SPbeta_like	58.5	58.5
NZ_CP039942.1	18KM2813	18KM2813_chr_6	Escher_HK639	58.5	53.6
NZ_CP039942.1	18KM2813	18KM2813_chr_7	Klebsi_ST512_KPC3phi13.2	58.5	53.4
NZ_CP039942.1	18KM2813	18KM2813_chr_8	Entero_P4	58.5	56.3
NZ_CP039943.1	18KM2813	18KM2813_pla_pMBR_DHA-1_1C_18KM2813_1	Salmon_SJ46	55	54
NZ_CP039944.1	18KM2813	18KM2813_pla_pMBR_OXA-48_18KM2813_1	Cronob_ENT39118	52.4	51.8
NZ_CP022023.1	19051	19051_chr_1	Salmon_118970_sal3	58.6	52.4
NZ_CP022023.1	19051	19051_chr_2	Escher_500465_1	58.6	57.7
NZ_CP022023.1	19051	19051_chr_3	Edward_GF_2	58.6	54.4
NZ_CP022023.1	19051	19051_chr_4	Salmon_SJ46	58.6	55.3
NZ_CP064174.1	19110124	19110124_chr_1	Escher_pro483	58.6	53.5
NZ_CP064174.1	19110124	19110124_chr_2	Escher_503458	58.6	58.8
NZ_CP064174.1	19110124	19110124_chr_3	Entero_P4	58.6	51.4
NZ_CP064174.1	19110124	19110124_chr_4	Entero_P4	58.6	53.6
NZ_CP064174.1	19110124	19110124_chr_5	Klebsi_ST16_OXA48phi5.4	58.6	52
NZ_CP064174.1	19110124	19110124_chr_6	Escher_HK639	58.6	54
NZ_CP064174.1	19110124	19110124_chr_7	Staphy_SPbeta_like	58.6	52.6
NZ_CP064174.1	19110124	19110124_chr_8	Salmon_SEN34	58.6	52.5
NZ_CP064174.1	19110124	19110124_chr_9	Escher_500465_1	58.6	57.6
NZ_CP064174.1	19110124	19110124_chr_10	Shigel_SfIV	58.6	53
NZ_CP064175.1	19110124	19110124_pla_p19110124-1_1	Escher_RCS47	52.3	51.2
NZ_CP064179.1	19110124	19110124_pla_p19110124-2_1	Escher_RCS47	52.9	54
NZ_CP064179.1	19110124	19110124_pla_p19110124-2_2	Salmon_SJ46	52.9	50.6
NZ_CP064176.1	19110124	19110124_pla_p19110124-4_1	Salmon_SJ46	54.8	51.8
NZ_CP103729.1	197	197_chr_1	Klebsi_ST147_VIM1phi7.1	58.6	55.4
NZ_CP103729.1	197	197_chr_2	Escher_500465_1	58.6	48.4
NZ_CP103729.1	197	197_chr_4	Entero_HK022	58.6	52.5
NZ_CP103729.1	197	197_chr_6	Entero_mEp237	58.6	53.6
NZ_CP103729.1	197	197_chr_7	Klebsi_phiKO2	58.6	54.5
NZ_CP103729.1	197	197_chr_8	Cronob_ENT47670	58.6	53.3
NZ_CP103730.1	197	197_pla_pMB2966_1_1	Staphy_SPbeta_like	53.6	56.5
NZ_CP103730.1	197	197_pla_pMB2966_1_3	Salmon_SJ46	53.6	52.7
NZ_CP103730.1	197	197_pla_pMB2966_1_4	Salmon_SJ46	53.6	54.2
NZ_CP103730.1	197	197_pla_pMB2966_1_5	Escher_RCS47	53.6	51.7
NZ_CP049950.1	19KM1053	19KM1053_chr_1	Salmon_118970_sal3	58.5	54.2
NZ_CP049950.1	19KM1053	19KM1053_chr_2	Escher_500465_1	58.5	57.4
NZ_CP049950.1	19KM1053	19KM1053_chr_3	Salmon_SEN34	58.5	54.1
NZ_CP049950.1	19KM1053	19KM1053_chr_4	Salmon_SEN34	58.5	54.8
NZ_CP049950.1	19KM1053	19KM1053_chr_5	Cronob_ENT39118	58.5	58.5
NZ_CP049950.1	19KM1053	19KM1053_chr_6	Escher_HK639	58.5	53.6
NZ_CP049950.1	19KM1053	19KM1053_chr_7	Klebsi_ST512_KPC3phi13.2	58.5	53.4
NZ_CP049950.1	19KM1053	19KM1053_chr_8	Entero_P4	58.5	56.3
NZ_CP049952.1	19KM1053	19KM1053_pla_pMBR_DHA-1_1CV3_2	Entero_P1	56.1	53.8
NZ_CP049951.1	19KM1053	19KM1053_pla_pMBR_OXA-48_1	Cronob_ENT39118	52.4	51.8
NZ_CP049953.1	19KM1109	19KM1109_chr_1	Entero_SfI	58.5	54.2
NZ_CP049953.1	19KM1109	19KM1109_chr_2	Escher_500465_1	58.5	57.4
NZ_CP049953.1	19KM1109	19KM1109_chr_3	Salmon_SEN34	58.5	54.1
NZ_CP049953.1	19KM1109	19KM1109_chr_4	Entero_lambda	58.5	56.2
NZ_CP049953.1	19KM1109	19KM1109_chr_5	Salmon_SEN34	58.5	54.8
NZ_CP049953.1	19KM1109	19KM1109_chr_6	Escher_RCS47	58.5	58.5
NZ_CP049953.1	19KM1109	19KM1109_chr_7	Escher_HK639	58.5	53.6
NZ_CP049953.1	19KM1109	19KM1109_chr_8	Klebsi_ST512_KPC3phi13.2	58.5	53.4
NZ_CP049953.1	19KM1109	19KM1109_chr_9	Entero_P4	58.5	56.3
NZ_CP049953.1	19KM1109	19KM1109_chr_10	Bacill_vB_BtS_BMBtp14	58.5	59
NZ_CP049955.1	19KM1109	19KM1109_pla_pMBR_DHA-1_1C_1	Escher_RCS47	55.2	52.5
NZ_CP049954.1	19KM1109	19KM1109_pla_pMBR_OXA-48_1	Salmon_vB_SosS_Oslo	52.4	51.8
NZ_CP049947.1	19KM267	19KM267_chr_1	Entero_SfI	58.5	54.2
NZ_CP049947.1	19KM267	19KM267_chr_2	Escher_500465_1	58.5	57.4
NZ_CP049947.1	19KM267	19KM267_chr_3	Salmon_SEN34	58.5	54.1
NZ_CP049947.1	19KM267	19KM267_chr_4	Salmon_SEN34	58.5	54.8
NZ_CP049947.1	19KM267	19KM267_chr_5	Escher_RCS47	58.5	58.5
NZ_CP049947.1	19KM267	19KM267_chr_6	Escher_HK639	58.5	53.6
NZ_CP049947.1	19KM267	19KM267_chr_7	Klebsi_ST512_KPC3phi13.2	58.5	53.4
NZ_CP049947.1	19KM267	19KM267_chr_8	Entero_P4	58.5	56.3
NZ_CP049949.1	19KM267	19KM267_pla_pMBR_DHA-1_1CV2_1	Salmon_SJ46	56.2	55.9
NZ_CP049948.1	19KM267	19KM267_pla_pMBR_OXA-48_1	Salmon_vB_SosS_Oslo	52.4	51.8
NZ_CP039945.1	19KM28	19KM28_chr_1	Shigel_SfIV	58.5	54.2
NZ_CP039945.1	19KM28	19KM28_chr_2	Escher_500465_1	58.5	57.4
NZ_CP039945.1	19KM28	19KM28_chr_3	Salmon_SEN34	58.5	54.1
NZ_CP039945.1	19KM28	19KM28_chr_4	Salmon_SEN34	58.5	54.8
NZ_CP039945.1	19KM28	19KM28_chr_5	Staphy_SPbeta_like	58.5	58.5
NZ_CP039945.1	19KM28	19KM28_chr_6	Escher_HK639	58.5	53.6
NZ_CP039945.1	19KM28	19KM28_chr_7	Klebsi_ST512_KPC3phi13.2	58.5	53.4
NZ_CP039945.1	19KM28	19KM28_chr_8	Entero_P4	58.5	56.3
NZ_CP039946.1	19KM28	19KM28_pla_pMBR_DHA-1_1C_19KM28_1	Salmon_SJ46	55	53.7
NZ_CP039947.1	19KM28	19KM28_pla_pMBR_OXA-48_19KM28_1	Cronob_ENT39118	52.4	51.8
NZ_CP039948.1	19KM57	19KM57_chr_1	Entero_SfI	58.5	54.2
NZ_CP039948.1	19KM57	19KM57_chr_2	Escher_500465_1	58.5	57.4
NZ_CP039948.1	19KM57	19KM57_chr_3	Salmon_SEN34	58.5	54.1
NZ_CP039948.1	19KM57	19KM57_chr_4	Salmon_SEN34	58.5	54.8
NZ_CP039948.1	19KM57	19KM57_chr_5	Cronob_ENT39118	58.5	58.5
NZ_CP039948.1	19KM57	19KM57_chr_6	Escher_HK639	58.5	53.6
NZ_CP039948.1	19KM57	19KM57_chr_7	Klebsi_ST512_KPC3phi13.2	58.5	53.4
NZ_CP039948.1	19KM57	19KM57_chr_8	Entero_P4	58.5	56.3
NZ_CP039949.1	19KM57	19KM57_pla_pMBR_DHA-1_2C_19KM57_1	Salmon_SJ46	54.9	53.7
NZ_CP039950.1	19KM57	19KM57_pla_pMBR_OXA-48_19KM57_1	Salmon_vB_SosS_Oslo	52.4	51.8
NZ_CP051159.1	19PDR22	19PDR22_chr_1	Edward_GF_2	58.3	54.9
NZ_CP051159.1	19PDR22	19PDR22_chr_2	Pectob_ZF40	58.3	53.5
NZ_CP051159.1	19PDR22	19PDR22_chr_3	Escher_ESCO5	58.3	51.9
NZ_CP051159.1	19PDR22	19PDR22_chr_4	Escher_phiV10	58.3	54.2
NZ_CP051159.1	19PDR22	19PDR22_chr_5	Klebsi_ST437_OXA245phi4.1	58.3	57
NZ_CP051159.1	19PDR22	19PDR22_chr_6	Escher_RCS47	58.3	46.1
NZ_CP051159.1	19PDR22	19PDR22_chr_7	Escher_RCS47	58.3	53.5
NZ_CP051159.1	19PDR22	19PDR22_chr_8	Salmon_118970_sal3	58.3	54.1
NZ_CP051159.1	19PDR22	19PDR22_chr_9	Entero_P4	58.3	52.7
NZ_CP051159.1	19PDR22	19PDR22_chr_10	Entero_P4	58.3	53.7
NZ_CP051159.1	19PDR22	19PDR22_chr_11	Klebsi_ST512_KPC3phi13.2	58.3	52.5
NZ_CP051159.1	19PDR22	19PDR22_chr_12	Klebsi_phiKO2	58.3	53.5
NZ_CP076553.1	19PDR22	19PDR22_pla_p19PDR22-KPC3_1	Salmon_SJ46	52	54.5
NZ_CP076554.1	19PDR22	19PDR22_pla_p19PDR22-KPC4_1	Escher_RCS47	55	51.6
NZ_CP076554.1	19PDR22	19PDR22_pla_p19PDR22-KPC4_3	Escher_RCS47	55	56.9
NZ_CP076554.1	19PDR22	19PDR22_pla_p19PDR22-KPC4_4	Salmon_SJ46	55	55.3
NZ_CP076548.1	19PDR22	19PDR22_pla_p2_1	Escher_RCS47	58.2	55.9
NZ_CP076549.1	19PDR22	19PDR22_pla_p5_1	Salmon_SEN34	53.1	53.2
NZ_CP076550.1	19PDR22	19PDR22_pla_p6_1	Klebsi_phiKO2	51.2	51.1
NZ_CP097237.1	1	1_chr_1	Entero_phiP27	58.6	55.2
NZ_CP097237.1	1	1_chr_2	Escher_HK639	58.6	52.9
NZ_CP097237.1	1	1_chr_4	Erwini_vB_EhrS_59	58.6	55.3
NZ_CP027042.1	1_GR_13	1_GR_13_chr_1	Klebsi_ST147_VIM1phi7.1	58.7	53.8
NZ_CP027042.1	1_GR_13	1_GR_13_chr_2	Escher_vB_EcoM_Schickermooser	58.7	51.5
NZ_CP027042.1	1_GR_13	1_GR_13_chr_3	Entero_HK544	58.7	53
NZ_CP027042.1	1_GR_13	1_GR_13_chr_4	Bacill_vB_BtS_BMBtp14	58.7	59.1
NZ_CP027043.1	1_GR_13	1_GR_13_pla_IncAC2_1	Escher_RCS47	53.9	57.6
NZ_CP027043.1	1_GR_13	1_GR_13_pla_IncAC2_2	Escher_RCS47	53.9	53
NZ_CP027045.1	1_GR_13	1_GR_13_pla_IncFIB_1	Salmon_SSU5	50.5	50.5
NZ_CP027044.1	1_GR_13	1_GR_13_pla_IncFIB_IncFII_1	Stx2_c_1717	54.7	52.1
NZ_CP027044.1	1_GR_13	1_GR_13_pla_IncFIB_IncFII_2	Escher_RCS47	54.7	56.8
NZ_CP027044.1	1_GR_13	1_GR_13_pla_IncFIB_IncFII_4	Escher_RCS47	54.7	54.4
NZ_CP027047.1	1_GR_13	1_GR_13_pla_IncR_IncN_1	Salmon_SJ46	54.3	54.7
NZ_CP027047.1	1_GR_13	1_GR_13_pla_IncR_IncN_2	Escher_RCS47	54.3	55.4
NZ_CP027046.1	1_GR_13	1_GR_13_pla_unnamed_1	Klebsi_phiKO2	52.7	53.7
NZ_CP097239.1	1	1_pla_p103.7_1	Stx2_c_Stx2a_F451	52.2	56.5
NZ_CP097239.1	1	1_pla_p103.7_2	Escher_RCS47	52.2	54.4
NZ_CP097238.1	1	1_pla_p283.4_1	Burkho_KL3	47.6	45.6
NZ_CP097238.1	1	1_pla_p283.4_2	Escher_RCS47	47.6	49.3
NZ_CP097238.1	1	1_pla_p283.4_3	Salmon_SJ46	47.6	55.2
NZ_CP097240.1	1	1_pla_p70.8_1	Escher_RCS47	54	52.4
NZ_CP097240.1	1	1_pla_p70.8_2	Salmon_SJ46	54	50.2
NZ_CP031562.1	2-1	2-1_chr_1	Escher_500465_1	58.7	57.4
NZ_CP031562.1	2-1	2-1_chr_2	Entero_mEp237	58.7	54
NZ_CP031564.1	2-1	2-1_pla_pKP21AC2_1	Bacill_SPbeta	53.9	53.1
NZ_CP031563.1	2-1	2-1_pla_pKP21HI1_1	Escher_SH2026Stx1	52.6	52.7
NZ_CP031563.1	2-1	2-1_pla_pKP21HI1_2	Stx2_c_1717	52.6	57.1
NZ_CP031563.1	2-1	2-1_pla_pKP21HI1_3	Stx2_c_Stx2a_F451	52.6	52.4
NZ_CP031563.1	2-1	2-1_pla_pKP21HI1_4	Stx2_c_1717	52.6	52.4
NZ_CP031563.1	2-1	2-1_pla_pKP21HI1_5	Klebsi_ST16_OXA48phi5.4	52.6	45.5
NZ_CP031563.1	2-1	2-1_pla_pKP21HI1_6	Escher_RCS47	52.6	53.2
NZ_CP031563.1	2-1	2-1_pla_pKP21HI1_7	Salmon_SJ46	52.6	50.8
NZ_CP055293.1	200	200_chr_1	Escher_500465_1	58.7	57.4
NZ_CP055293.1	200	200_chr_2	Escher_vB_EcoM_Schickermooser	58.7	49.3
NZ_CP055293.1	200	200_chr_3	Escher_HK639	58.7	54
NZ_CP065034.1	2016-1400	2016-1400_chr_1	Burkho_phi1026b	58.7	59
NZ_CP065034.1	2016-1400	2016-1400_chr_2	Entero_c_1	58.7	54.5
NZ_CP065034.1	2016-1400	2016-1400_chr_3	Klebsi_4LV2017	58.7	52.1
NZ_CP065035.1	2016-1400	2016-1400_pla_unnamed_1	Salmon_SJ46	53.2	48.2
NZ_CP065035.1	2016-1400	2016-1400_pla_unnamed_2	Escher_RCS47	53.2	51.6
NZ_CP068015.1	2016_49	2016_49_chr_1	Salmon_SPN1S	58.4	55.1
NZ_CP068015.1	2016_49	2016_49_chr_2	Erwini_vB_EhrS_59	58.4	53.9
NZ_CP068015.1	2016_49	2016_49_chr_3	Mycoba_RhynO	58.4	58
NZ_CP068015.1	2016_49	2016_49_chr_4	Aeromo_vB_AsaM_56	58.4	54.7
NZ_CP068015.1	2016_49	2016_49_chr_5	Salmon_118970_sal3	58.4	52.4
NZ_CP068015.1	2016_49	2016_49_chr_6	Klebsi_phiKO2	58.4	55.3
NZ_CP068015.1	2016_49	2016_49_chr_7	Escher_RCS47	58.4	52.4
NZ_CP068016.1	2016_49	2016_49_pla_pMS3802-CTXM-vir_1	Entero_fiAA91_ss	51.1	48.8
NZ_CP068016.1	2016_49	2016_49_pla_pMS3802-CTXM-vir_2	Salmon_SJ46	51.1	52.5
NZ_CP068016.1	2016_49	2016_49_pla_pMS3802-CTXM-vir_3	Klebsi_ZCKP1	51.1	50.7
NZ_CP068016.1	2016_49	2016_49_pla_pMS3802-CTXM-vir_4	Escher_SH2026Stx1	51.1	54.4
NZ_CP068017.1	2016_49	2016_49_pla_pMS3802OXARMA_1	Cronob_ENT39118	51.7	52.2
NZ_CP044368.1	2018C01-046	2018C01-046_chr_1	Escher_SH2026Stx1	58.6	52.6
NZ_CP044368.1	2018C01-046	2018C01-046_chr_2	Klebsi_4LV2017	58.6	53.5
NZ_CP044368.1	2018C01-046	2018C01-046_chr_3	Escher_RCS47	58.6	59.8
NZ_CP044368.1	2018C01-046	2018C01-046_chr_4	Klebsi_ST16_OXA48phi5.4	58.6	52.1
NZ_CP044368.1	2018C01-046	2018C01-046_chr_5	Salmon_118970_sal3	58.6	51.5
NZ_CP044368.1	2018C01-046	2018C01-046_chr_6	Escher_500465_1	58.6	55.7
NZ_CP044368.1	2018C01-046	2018C01-046_chr_7	Strept_PapayaSalad	58.6	51.5
NZ_CP044369.1	2018C01-046	2018C01-046_pla_p2018C01-046-1_MCR8_1	Escher_RCS47	53.2	50.8
NZ_CP044369.1	2018C01-046	2018C01-046_pla_p2018C01-046-1_MCR8_2	Staphy_SPbeta_like	53.2	53.3
NZ_CP044370.1	2018C01-046	2018C01-046_pla_p2018C01-046-2_1	Salmon_SSU5	50.4	51
NZ_CP044371.1	2018C01-046	2018C01-046_pla_p2018C01-046-3_1	Escher_RCS47	58	59.1
NZ_CP044385.1	2018C01-239	2018C01-239_chr_1	Pseudo_OBP	58.8	58
NZ_CP044385.1	2018C01-239	2018C01-239_chr_2	Entero_P1	58.8	42.5
NZ_CP044385.1	2018C01-239	2018C01-239_chr_3	Salmon_118970_sal3	58.8	49.9
NZ_CP044385.1	2018C01-239	2018C01-239_chr_4	Escher_RCS47	58.8	59.4
NZ_CP044385.1	2018C01-239	2018C01-239_chr_5	Escher_500465_1	58.8	55.2
NZ_CP044386.1	2018C01-239	2018C01-239_pla_p2018C01-239-1_MCR1_1	Clostr_c_st	48	48
NZ_CP044386.1	2018C01-239	2018C01-239_pla_p2018C01-239-1_MCR1_3	Escher_RCS47	48	53.5
NZ_CP044386.1	2018C01-239	2018C01-239_pla_p2018C01-239-1_MCR1_5	Staphy_SPbeta_like	48	51.2
NZ_CP044386.1	2018C01-239	2018C01-239_pla_p2018C01-239-1_MCR1_6	Stx2_c_Stx2a_F451	48	54.7
NZ_CP044386.1	2018C01-239	2018C01-239_pla_p2018C01-239-1_MCR1_7	Salmon_SSU5	48	46.8
NZ_CP044386.1	2018C01-239	2018C01-239_pla_p2018C01-239-1_MCR1_8	Entero_mEp237	48	45.4
NZ_CP044387.1	2018C01-239	2018C01-239_pla_p2018C01-239-2_1	Escher_RCS47	53.8	54
NZ_CP044387.1	2018C01-239	2018C01-239_pla_p2018C01-239-2_3	Escher_RCS47	53.8	53.3
NZ_CP044387.1	2018C01-239	2018C01-239_pla_p2018C01-239-2_4	Rhodob_RcapNL	53.8	55.5
NZ_CP044393.1	2018N16-148	2018N16-148_chr_1	Escher_RCS47	58.9	60
NZ_CP044393.1	2018N16-148	2018N16-148_chr_2	Klebsi_phiKO2	58.9	54.2
NZ_CP044393.1	2018N16-148	2018N16-148_chr_3	Salmon_118970_sal3	58.9	52.2
NZ_CP044393.1	2018N16-148	2018N16-148_chr_4	Escher_500465_1	58.9	57.7
NZ_CP044394.1	2018N16-148	2018N16-148_pla_p2018N16-148-1_1	Escher_RCS47	54.3	53.9
NZ_CP044394.1	2018N16-148	2018N16-148_pla_p2018N16-148-1_3	Escher_RCS47	54.3	49.8
NZ_CP044394.1	2018N16-148	2018N16-148_pla_p2018N16-148-1_4	Escher_Skarpretter	54.3	57
NZ_CP044395.1	2018N16-148	2018N16-148_pla_p2018N16-148-2_MCR8_1	Mycoba_Pollywog	52.6	46.1
NZ_CP044389.1	2018N17-066	2018N17-066_chr_1	Stx2_c_Stx2a_F451	58.6	52.7
NZ_CP044389.1	2018N17-066	2018N17-066_chr_2	Cronob_ENT39118	58.6	50.4
NZ_CP044389.1	2018N17-066	2018N17-066_chr_3	Salmon_118970_sal3	58.6	52.6
NZ_CP044389.1	2018N17-066	2018N17-066_chr_4	Entero_c_1	58.6	51.9
NZ_CP044389.1	2018N17-066	2018N17-066_chr_5	Stx2_c_1717	58.6	56.9
NZ_CP044389.1	2018N17-066	2018N17-066_chr_6	Escher_500465_1	58.6	56.6
NZ_CP044390.1	2018N17-066	2018N17-066_pla_p2018N17-066-1_1	Escher_RCS47	54.2	54.2
NZ_CP044391.1	2018N17-066	2018N17-066_pla_p2018N17-066-2_MCR8_1	Spirop_SkV1_CR2_3x	52.6	56.1
NZ_CP044376.1	2018S06-082	2018S06-082_chr_1	Escher_vB_EcoM_Schickermooser	58.7	46.8
NZ_CP044376.1	2018S06-082	2018S06-082_chr_2	Mycoba_Turbido	58.7	60.9
NZ_CP044376.1	2018S06-082	2018S06-082_chr_3	Pseudo_PS_1	58.7	53.4
NZ_CP044376.1	2018S06-082	2018S06-082_chr_4	Escher_HK639	58.7	51.9
NZ_CP044376.1	2018S06-082	2018S06-082_chr_6	Escher_RCS47	58.7	59.8
NZ_CP044376.1	2018S06-082	2018S06-082_chr_7	Bacill_vB_BtS_BMBtp14	58.7	59.5
NZ_CP044376.1	2018S06-082	2018S06-082_chr_8	Escher_500465_1	58.7	55.7
NZ_CP044377.1	2018S06-082	2018S06-082_pla_p2018S06-082-1_MCR1_1	Escher_RCS47	48	48.2
NZ_CP044377.1	2018S06-082	2018S06-082_pla_p2018S06-082-1_MCR1_3	Escher_RCS47	48	53.4
NZ_CP044378.1	2018S06-082	2018S06-082_pla_p2018S06-082-2_1	Salmon_SJ46	53.6	55.2
NZ_CP044378.1	2018S06-082	2018S06-082_pla_p2018S06-082-2_2	Salmon_SJ46	53.6	53.3
NZ_CP044378.1	2018S06-082	2018S06-082_pla_p2018S06-082-2_3	Escher_Skarpretter	53.6	56.8
NZ_CP044380.1	2018S07-013	2018S07-013_chr_1	Cronob_vB_CsaP_009	59	58.3
NZ_CP044380.1	2018S07-013	2018S07-013_chr_2	Klebsi_ST16_OXA48phi5.4	59	52.6
NZ_CP044380.1	2018S07-013	2018S07-013_chr_3	Klebsi_ST15_OXA48phi14.1	59	55.4
NZ_CP044380.1	2018S07-013	2018S07-013_chr_4	Escher_500465_1	59	58.1
NZ_CP044381.1	2018S07-013	2018S07-013_pla_p2018S07-013-1_1	Bacill_G	48.5	48.6
NZ_CP044381.1	2018S07-013	2018S07-013_pla_p2018S07-013-1_2	Staphy_SPbeta_like	48.5	49.3
NZ_CP044381.1	2018S07-013	2018S07-013_pla_p2018S07-013-1_3	Escher_RCS47	48.5	50.8
NZ_CP044381.1	2018S07-013	2018S07-013_pla_p2018S07-013-1_4	Escher_RCS47	48.5	49.9
NZ_CP044381.1	2018S07-013	2018S07-013_pla_p2018S07-013-1_5	Shigel_SfII	48.5	52
NZ_CP044381.1	2018S07-013	2018S07-013_pla_p2018S07-013-1_6	Escher_RCS47	48.5	54.7
NZ_CP044381.1	2018S07-013	2018S07-013_pla_p2018S07-013-1_7	Aeromo_pIS4_A	48.5	46.6
NZ_CP044381.1	2018S07-013	2018S07-013_pla_p2018S07-013-1_8	Entero_mEp237	48.5	45.2
NZ_CP044382.1	2018S07-013	2018S07-013_pla_p2018S07-013-2_1	Microc_MaMV_DC	53.2	54.9
NZ_CP044382.1	2018S07-013	2018S07-013_pla_p2018S07-013-2_3	Bacter_Diva	53.2	55.4
NZ_CP047336.1	2019036D	2019036D_chr_1	Entero_P4	58.5	53.6
NZ_CP047336.1	2019036D	2019036D_chr_2	Klebsi_ST512_KPC3phi13.2	58.5	53.6
NZ_CP047336.1	2019036D	2019036D_chr_3	Salmon_118970_sal3	58.5	52.3
NZ_CP047336.1	2019036D	2019036D_chr_4	Klebsi_ST147_VIM1phi7.1	58.5	55.7
NZ_CP047336.1	2019036D	2019036D_chr_5	Escher_500465_1	58.5	57.6
NZ_CP047336.1	2019036D	2019036D_chr_6	Entero_phiP27	58.5	53.9
NZ_CP047336.1	2019036D	2019036D_chr_7	Paenib_Leyra	58.5	59.2
NZ_CP047336.1	2019036D	2019036D_chr_8	Escher_RCS47	58.5	45.8
NZ_CP047338.1	2019036D	2019036D_pla_p2019036D-50kb_1	Salmon_SJ46	55.6	56.2
NZ_CP047337.1	2019036D	2019036D_pla_p2019036D-mcr8-345kb_1	Escher_RCS47	53.5	54.6
NZ_CP047337.1	2019036D	2019036D_pla_p2019036D-mcr8-345kb_2	Escher_RCS47	53.5	60.5
NZ_CP047337.1	2019036D	2019036D_pla_p2019036D-mcr8-345kb_3	Salmon_SJ46	53.5	56.2
NZ_CP047337.1	2019036D	2019036D_pla_p2019036D-mcr8-345kb_4	Escher_RCS47	53.5	53.7
NZ_CP047337.1	2019036D	2019036D_pla_p2019036D-mcr8-345kb_5	Salmon_SJ46	53.5	51.2
NZ_CP104659.1	2020CK-00096	2020CK-00096_chr_1	Escher_HK639	58.6	52.8
NZ_CP104659.1	2020CK-00096	2020CK-00096_chr_2	Salmon_118970_sal3	58.6	51.7
NZ_CP104659.1	2020CK-00096	2020CK-00096_chr_3	Escher_HK639	58.6	53.6
NZ_CP104659.1	2020CK-00096	2020CK-00096_chr_4	Escher_500465_1	58.6	53.5
NZ_CP104659.1	2020CK-00096	2020CK-00096_chr_5	Burkho_phi1026b	58.6	56
NZ_CP104659.1	2020CK-00096	2020CK-00096_chr_6	Escher_HK639	58.6	56.3
NZ_CP104678.1	2021CK-00608	2021CK-00608_chr_1	Klebsi_ST15_OXA48phi14.1	58.4	54.1
NZ_CP104678.1	2021CK-00608	2021CK-00608_chr_2	Entero_HK140	58.4	52.2
NZ_CP104678.1	2021CK-00608	2021CK-00608_chr_3	Salmon_SJ46	58.4	51.2
NZ_CP104678.1	2021CK-00608	2021CK-00608_chr_4	Klebsi_ST16_OXA48phi5.4	58.4	51.6
NZ_CP104678.1	2021CK-00608	2021CK-00608_chr_5	Salmon_118970_sal3	58.4	51.7
NZ_CP104679.1	2021CK-00608	2021CK-00608_pla_unnamed1_1	Stx2_c_Stx2a_F451	52.5	56.9
NZ_CP104679.1	2021CK-00608	2021CK-00608_pla_unnamed1_2	Stx2_c_1717	52.5	53.3
NZ_CP104679.1	2021CK-00608	2021CK-00608_pla_unnamed1_3	Escher_SH2026Stx1	52.5	52.9
NZ_CP104679.1	2021CK-00608	2021CK-00608_pla_unnamed1_4	Stx2_c_1717	52.5	52.8
NZ_CP104679.1	2021CK-00608	2021CK-00608_pla_unnamed1_5	Escher_RCS47	52.5	47.2
NZ_CP104679.1	2021CK-00608	2021CK-00608_pla_unnamed1_6	Stx2_c_Stx2a_F451	52.5	53.2
NZ_CP104680.1	2021CK-00608	2021CK-00608_pla_unnamed2_1	Salmon_SJ46	53.3	52.4
NZ_CP104680.1	2021CK-00608	2021CK-00608_pla_unnamed2_2	Escher_RCS47	53.3	55
NZ_CP104660.1	2021CK-01729	2021CK-01729_chr_2	Escher_500465_1	58.6	53.2
NZ_CP104660.1	2021CK-01729	2021CK-01729_chr_3	Escher_phiV10	58.6	54.9
NZ_CP104660.1	2021CK-01729	2021CK-01729_chr_4	Entero_SfV	58.6	52.4
NZ_CP104661.1	2021CK-01729	2021CK-01729_pla_unnamed1_1	Entero_P1	53.5	51.2
NZ_CP104662.1	2021CK-01729	2021CK-01729_pla_unnamed2_1	Salmon_SJ46	53.2	51.7
NZ_CP104662.1	2021CK-01729	2021CK-01729_pla_unnamed2_3	Escher_RCS47	53.2	55
NZ_CP104373.1	2021CK-01815	2021CK-01815_chr_2	Escher_500465_1	58.6	53.2
NZ_CP104373.1	2021CK-01815	2021CK-01815_chr_3	Escher_phiV10	58.6	54.9
NZ_CP104373.1	2021CK-01815	2021CK-01815_chr_4	Entero_SfV	58.6	52.4
NZ_CP104374.1	2021CK-01815	2021CK-01815_pla_unnamed1_1	Salmon_SJ46	53.3	52.4
NZ_CP104374.1	2021CK-01815	2021CK-01815_pla_unnamed1_2	Escher_RCS47	53.3	55
NZ_CP104375.1	2021CK-01815	2021CK-01815_pla_unnamed2_1	Entero_P1	52.8	51
NZ_CP021165.1	203	203_chr_1	Pseudo_PMG1	58.7	54.1
NZ_CP021165.1	203	203_chr_2	Escher_500465_1	58.7	55.2
NZ_CP021165.1	203	203_chr_3	Entero_phi92	58.7	48.4
NZ_CP021165.1	203	203_chr_4	Entero_mEp237	58.7	52.4
NZ_CP021165.1	203	203_chr_5	Salmon_118970_sal3	58.7	51.6
NZ_CP021165.1	203	203_chr_6	Bacill_vB_BtS_BMBtp14	58.7	59.3
NZ_CP021166.1	203	203_pla_p203_1	Salmon_SJ46	52.5	51.5
NZ_CP021166.1	203	203_pla_p203_2	Escher_RCS47	52.5	53.8
NZ_CP030302.1	205880	205880_chr_1	Escher_500465_1	58.6	52.5
NZ_CP030302.1	205880	205880_chr_2	Salmon_118970_sal3	58.6	53.8
NZ_CP030302.1	205880	205880_chr_3	Pseudo_PS_1	58.6	53.2
NZ_CP030302.1	205880	205880_chr_4	Klebsi_ST16_OXA48phi5.4	58.6	49.9
NZ_CP030303.1	205880	205880_pla_p205880-1_1	Salmon_SJ46	52.2	59.2
NZ_CP030303.1	205880	205880_pla_p205880-1_2	Lactob_phiAQ113	52.2	50.6
NZ_CP030303.1	205880	205880_pla_p205880-1_3	Escher_RCS47	52.2	53.4
NZ_CP030305.1	205880	205880_pla_p205880-3_1	Escher_RCS47	56	53.8
NZ_CP030306.1	205880	205880_pla_p205880-4_1	Salmon_SSU5	50.4	50.4
NZ_CP030307.1	205880	205880_pla_p205880-5_1	Sodali_phiSG1	51.3	55
NZ_CP030308.1	205880	205880_pla_p205880-6_1	Escher_RCS47	55.1	56.2
NZ_CP030309.1	205880	205880_pla_p205880-7_1	Escher_RCS47	53.8	51.6
NZ_CP030310.1	205880	205880_pla_p205880-8_1	Escher_RCS47	53.6	55.3
NZ_CP027048.1	20_GR_12	20_GR_12_chr_1	Entero_SfI	58.5	54.2
NZ_CP027048.1	20_GR_12	20_GR_12_chr_2	Escher_500465_1	58.5	57.4
NZ_CP027048.1	20_GR_12	20_GR_12_chr_3	Escher_TL_2011b	58.5	54.1
NZ_CP027048.1	20_GR_12	20_GR_12_chr_4	Microc_Ma_LMM01	58.5	44.1
NZ_CP027048.1	20_GR_12	20_GR_12_chr_5	Salmon_SEN34	58.5	54.5
NZ_CP027048.1	20_GR_12	20_GR_12_chr_6	Escher_HK639	58.5	53.4
NZ_CP027048.1	20_GR_12	20_GR_12_chr_7	Klebsi_ST512_KPC3phi13.2	58.5	52.4
NZ_CP027048.1	20_GR_12	20_GR_12_chr_8	Entero_P4	58.5	56.3
NZ_CP027048.1	20_GR_12	20_GR_12_chr_9	Entero_P4	58.5	51.2
NZ_CP027048.1	20_GR_12	20_GR_12_chr_10	Bacill_vB_BtS_BMBtp14	58.5	59
NZ_CP027051.1	20_GR_12	20_GR_12_pla_IncX3_1	Escher_RCS47	48.1	57.7
NZ_CP027049.1	20_GR_12	20_GR_12_pla_unnamed_2	Escher_RCS47	53.9	60
NZ_CP027049.1	20_GR_12	20_GR_12_pla_unnamed_3	Escher_RCS47	53.9	54.4
NZ_CP095234.1	21072329	21072329_chr_1	Cronob_ENT39118	58.6	55.1
NZ_CP095234.1	21072329	21072329_chr_2	Entero_phi80	58.6	54.7
NZ_CP095234.1	21072329	21072329_chr_3	Klebsi_phiKO2	58.6	55.8
NZ_CP095234.1	21072329	21072329_chr_4	Klebsi_ST512_KPC3phi13.2	58.6	53.9
NZ_CP095234.1	21072329	21072329_chr_5	Entero_P4	58.6	56.2
NZ_CP095234.1	21072329	21072329_chr_6	Entero_P4	58.6	52.5
NZ_CP095234.1	21072329	21072329_chr_7	Bacill_vB_BtS_BMBtp14	58.6	59
NZ_CP095234.1	21072329	21072329_chr_8	Entero_SfI	58.6	53.6
NZ_CP095234.1	21072329	21072329_chr_9	Escher_RCS47	58.6	48.7
NZ_CP095234.1	21072329	21072329_chr_10	Klebsi_ST437_OXA245phi4.1	58.6	55.3
NZ_CP095234.1	21072329	21072329_chr_11	Escher_phiV10	58.6	54.3
NZ_CP095234.1	21072329	21072329_chr_12	Escher_ESCO5	58.6	51.6
NZ_CP095234.1	21072329	21072329_chr_13	Edward_GF_2	58.6	53.2
NZ_CP095235.1	21072329	21072329_pla_p21072329_1_2	Escher_RCS47	54.9	56.3
NZ_CP095235.1	21072329	21072329_pla_p21072329_1_4	Escher_RCS47	54.9	58
NZ_CP095235.1	21072329	21072329_pla_p21072329_1_5	Entero_P1	54.9	56.3
NZ_CP095236.1	21072329	21072329_pla_p21072329_2_1	Escher_RCS47	54.3	53.4
NZ_CP095237.1	21072329	21072329_pla_p21072329_3_1	Salmon_SEN34	52.7	52.6
NZ_CP095240.1	21080237	21080237_chr_1	Entero_phi92	58.6	55.3
NZ_CP095240.1	21080237	21080237_chr_2	Escher_phiV10	58.6	54.3
NZ_CP095240.1	21080237	21080237_chr_3	Klebsi_ST437_OXA245phi4.1	58.6	56
NZ_CP095240.1	21080237	21080237_chr_4	Salmon_ST64B	58.6	53.6
NZ_CP095240.1	21080237	21080237_chr_5	Bacill_vB_BtS_BMBtp14	58.6	58.8
NZ_CP095240.1	21080237	21080237_chr_6	Entero_P4	58.6	52.8
NZ_CP095240.1	21080237	21080237_chr_7	Entero_P4	58.6	53.7
NZ_CP095240.1	21080237	21080237_chr_8	Klebsi_ST512_KPC3phi13.2	58.6	52.4
NZ_CP095240.1	21080237	21080237_chr_9	Klebsi_phiKO2	58.6	55.3
NZ_CP095240.1	21080237	21080237_chr_10	Escher_HK639	58.6	54.9
NZ_CP095241.1	21080237	21080237_pla_p21080237_1_1	Escher_RCS47	51	49.1
NZ_CP095241.1	21080237	21080237_pla_p21080237_1_2	Escher_ESCO5	51	50.7
NZ_CP095241.1	21080237	21080237_pla_p21080237_1_3	Escher_SH2026Stx1	51	53.4
NZ_CP095242.1	21080237	21080237_pla_p21080237_2_1	Escher_RCS47	54.5	51.6
NZ_CP095242.1	21080237	21080237_pla_p21080237_2_2	Escher_RCS47	54.5	58.5
NZ_CP095242.1	21080237	21080237_pla_p21080237_2_3	Salmon_SJ46	54.5	55.3
NZ_CP095243.1	21080237	21080237_pla_p21080237_3_1	Escher_RCS47	55.1	55.2
NZ_CP095243.1	21080237	21080237_pla_p21080237_3_2	Escher_RCS47	55.1	55.6
NZ_CP095244.1	21080237	21080237_pla_p21080237_4_1	Entero_c_1	51.1	51.3
NZ_CP095245.1	21080237	21080237_pla_p21080237_5_1	Salmon_SEN34	53.1	53.2
NZ_CP095247.1	21080534	21080534_chr_1	Salmon_ST64B	58.4	54.2
NZ_CP095247.1	21080534	21080534_chr_2	Klebsi_ST437_OXA245phi4.1	58.4	56
NZ_CP095247.1	21080534	21080534_chr_3	Escher_phiV10	58.4	54.6
NZ_CP095247.1	21080534	21080534_chr_4	Escher_vB_EcoM_Schickermooser	58.4	55.8
NZ_CP095247.1	21080534	21080534_chr_5	Salmon_SEN34	58.4	54.8
NZ_CP095247.1	21080534	21080534_chr_6	Escher_RCS47	58.4	55.1
NZ_CP095247.1	21080534	21080534_chr_7	Escher_HK639	58.4	54.5
NZ_CP095247.1	21080534	21080534_chr_8	Klebsi_phiKO2	58.4	55.1
NZ_CP095247.1	21080534	21080534_chr_9	Entero_mEp237	58.4	48.7
NZ_CP095247.1	21080534	21080534_chr_10	Entero_c_1	58.4	51.6
NZ_CP095247.1	21080534	21080534_chr_11	Klebsi_ST512_KPC3phi13.2	58.4	52.4
NZ_CP095247.1	21080534	21080534_chr_12	Entero_P4	58.4	56.2
NZ_CP095247.1	21080534	21080534_chr_13	Entero_P4	58.4	51.5
NZ_CP095247.1	21080534	21080534_chr_14	Escher_503458	58.4	59
NZ_CP095248.1	21080534	21080534_pla_p21080534_1_1	Erwini_vB_EamM_Y3	53.1	50
NZ_CP095248.1	21080534	21080534_pla_p21080534_1_2	Escher_RCS47	53.1	60.2
NZ_CP095248.1	21080534	21080534_pla_p21080534_1_3	Entero_P1	53.1	53.9
NZ_CP095248.1	21080534	21080534_pla_p21080534_1_4	Escher_RCS47	53.1	50.5
NZ_CP095249.1	21080534	21080534_pla_p21080534_2_1	Escher_RCS47	55.2	56.5
NZ_CP095253.1	21080937	21080937_chr_1	Klebsi_phiKO2	58.6	53.4
NZ_CP095253.1	21080937	21080937_chr_2	Klebsi_ST512_KPC3phi13.2	58.6	52.7
NZ_CP095253.1	21080937	21080937_chr_3	Entero_P4	58.6	56.4
NZ_CP095253.1	21080937	21080937_chr_4	Entero_P4	58.6	52.6
NZ_CP095253.1	21080937	21080937_chr_5	Bacill_vB_BtS_BMBtp14	58.6	59
NZ_CP095253.1	21080937	21080937_chr_6	Salmon_ST64B	58.6	53.6
NZ_CP095253.1	21080937	21080937_chr_7	Klebsi_ST437_OXA245phi4.1	58.6	56
NZ_CP095253.1	21080937	21080937_chr_8	Escher_phiV10	58.6	54.3
NZ_CP095253.1	21080937	21080937_chr_9	Escher_vB_EcoM_Schickermooser	58.6	55.8
NZ_CP095254.1	21080937	21080937_pla_p21080937_1_1	Entero_mEpX1	52.3	50.7
NZ_CP095254.1	21080937	21080937_pla_p21080937_1_2	Escher_SH2026Stx1	52.3	54.4
NZ_CP095255.1	21080937	21080937_pla_p21080937_2_1	Erwini_vB_EamM_Alexandra	52	49.5
NZ_CP095255.1	21080937	21080937_pla_p21080937_2_2	Entero_P1	52	55.7
NZ_CP095256.1	21080937	21080937_pla_p21080937_3_1	Escher_503458	51.7	51.6
NZ_CP095257.1	21080937	21080937_pla_p21080937_4_1	Salmon_SEN34	53.1	53.2
NZ_CP095258.1	21080937	21080937_pla_p21080937_5_1	Entero_Arya	62.6	62.8
NZ_CP095260.1	21080937	21080937_pla_p21080937_7_1	Pseudo_PPpW_3	62.2	62.1
NZ_CP095261.1	21080937	21080937_pla_p21080937_8_1	Escher_RCS47	56.3	57.2
NZ_CP095264.1	21091025	21091025_chr_1	Salmon_ST64B	58.5	54.2
NZ_CP095264.1	21091025	21091025_chr_2	Klebsi_ST437_OXA245phi4.1	58.5	56
NZ_CP095264.1	21091025	21091025_chr_3	Escher_phiV10	58.5	55.7
NZ_CP095264.1	21091025	21091025_chr_4	Escher_vB_EcoM_Schickermooser	58.5	55.8
NZ_CP095264.1	21091025	21091025_chr_5	Salmon_SEN34	58.5	54.9
NZ_CP095264.1	21091025	21091025_chr_6	Escher_HK639	58.5	54.1
NZ_CP095264.1	21091025	21091025_chr_8	Entero_c_1	58.5	50.8
NZ_CP095264.1	21091025	21091025_chr_9	Klebsi_ST512_KPC3phi13.2	58.5	52.4
NZ_CP095264.1	21091025	21091025_chr_10	Entero_P4	58.5	56.2
NZ_CP095264.1	21091025	21091025_chr_11	Entero_P4	58.5	53.5
NZ_CP095265.1	21091025	21091025_pla_p21091025_1_1	Salmon_SJ46	54.5	51.9
NZ_CP095265.1	21091025	21091025_pla_p21091025_1_2	Escher_RCS47	54.5	58.5
NZ_CP095265.1	21091025	21091025_pla_p21091025_1_3	Entero_P1	54.5	55.3
NZ_CP095266.1	21091025	21091025_pla_p21091025_2_1	Escher_RCS47	55.1	55.2
NZ_CP095266.1	21091025	21091025_pla_p21091025_2_2	Salmon_SJ46	55.1	55.6
NZ_CP103727.1	2289	2289_chr_1	Escher_500465_1	58.8	48.1
NZ_CP103727.1	2289	2289_chr_2	Entero_HK140	58.8	52.4
NZ_CP103727.1	2289	2289_chr_3	Erwini_vB_EhrS_59	58.8	53.6
NZ_CP103728.1	2289	2289_pla_pMB3028_1_1	Escher_RCS47	53.2	52.8
NZ_CP103728.1	2289	2289_pla_pMB3028_1_2	Escher_RCS47	53.2	56.2
NZ_CP103728.1	2289	2289_pla_pMB3028_1_3	Escher_RCS47	53.2	54.5
NZ_CP011313.1	234-12	234-12_chr_1	Klebsi_ST147_VIM1phi7.1	58.6	54.8
NZ_CP011313.1	234-12	234-12_chr_2	Escher_500465_1	58.6	57.6
NZ_CP011313.1	234-12	234-12_chr_3	Erwini_vB_EhrS_59	58.6	52.9
NZ_CP011313.1	234-12	234-12_chr_5	Entero_mEp237	58.6	52.8
NZ_CP011314.1	234-12	234-12_pla_pKpn23412-362_1	Cronob_ENT39118	49.4	50.9
NZ_CP011314.1	234-12	234-12_pla_pKpn23412-362_2	Synech_S_SM2	49.4	53.9
NZ_CP011314.1	234-12	234-12_pla_pKpn23412-362_3	Escher_Av_05	49.4	47.1
NZ_CP011314.1	234-12	234-12_pla_pKpn23412-362_4	Entero_RB43	49.4	45.7
NZ_CP011314.1	234-12	234-12_pla_pKpn23412-362_5	Bacill_Shanette	49.4	44.7
NZ_CP011314.1	234-12	234-12_pla_pKpn23412-362_6	Escher_RCS47	49.4	53.8
NZ_CP030320.1	23	23er_chr_1	Escher_500465_1	58.7	55.4
NZ_CP030320.1	23	23er_chr_2	Salmon_SPN1S	58.7	53.6
NZ_CP030320.1	23	23er_chr_3	Klebsi_ST16_OXA48phi5.4	58.7	51.7
NZ_CP030320.1	23	23er_chr_4	Klebsi_phiKO2	58.7	53.9
NZ_CP030321.1	23	23er_pla_p23-1_1	Klebsi_ZCKP1	51.1	51.3
NZ_CP030321.1	23	23er_pla_p23-1_2	Escher_SH2026Stx1	51.1	52.5
NZ_CP030322.1	23	23er_pla_p23-2_1	Salmon_SSU5	50.5	50.7
NZ_CP016926.1	23	23yi_chr_1	Salmon_Fels_1	58.6	55.3
NZ_CP016926.1	23	23yi_chr_2	Escher_500465_1	58.6	53.4
NZ_CP016926.1	23	23yi_chr_3	Entero_c_1	58.6	50.7
NZ_CP016925.1	23	23yi_pla_pCTXM15_DHQP1400954_1	Salmon_SJ46	54.1	54.4
NZ_CP016924.1	23	23yi_pla_pIncFIB_DHQP1400954_1	Salmon_SSU5	50.2	50.2
NZ_CP016927.1	23	23yi_pla_pIncL_M_DHQP1400954_1	Salmon_vB_SosS_Oslo	51.7	53.8
NZ_CP103550.1	2791	2791_chr_1	Pseudo_YMC11/02/R656	58.5	59.3
NZ_CP103550.1	2791	2791_chr_2	Klebsi_ST437_OXA245phi4.1	58.5	53.4
NZ_CP103550.1	2791	2791_chr_4	Escher_HK639	58.5	53.9
NZ_CP103550.1	2791	2791_chr_5	Salmon_118970_sal3	58.5	51.7
NZ_CP103550.1	2791	2791_chr_6	Salmon_SEN34	58.5	54.9
NZ_CP103551.1	2791	2791_pla_pMB8806_1_1	Escher_RCS47	55.1	56.6
NZ_CP103552.1	2791	2791_pla_pMB8806_2_1	Escher_RCS47	53.5	54.3
NZ_CP103553.1	2791	2791_pla_pMB8806_3_1	Escher_RCS47	53.4	52.7
NZ_CP030300.1	283747	283747_chr_1	Salmon_ST64B	58.5	54.2
NZ_CP030300.1	283747	283747_chr_2	Klebsi_ST437_OXA245phi4.1	58.5	56
NZ_CP030300.1	283747	283747_chr_3	Escher_phiV10	58.5	54.3
NZ_CP030300.1	283747	283747_chr_4	Escher_vB_EcoM_Schickermooser	58.5	51.6
NZ_CP030300.1	283747	283747_chr_5	Pectob_ZF40	58.5	53
NZ_CP030300.1	283747	283747_chr_6	Salmon_SEN34	58.5	54.5
NZ_CP030300.1	283747	283747_chr_7	Bacill_SPbeta	58.5	55.1
NZ_CP030300.1	283747	283747_chr_8	Escher_HK639	58.5	54.5
NZ_CP030300.1	283747	283747_chr_9	Klebsi_phiKO2	58.5	55.1
NZ_CP030300.1	283747	283747_chr_10	Klebsi_ST512_KPC3phi13.2	58.5	52.4
NZ_CP030300.1	283747	283747_chr_11	Entero_P4	58.5	56.1
NZ_CP030300.1	283747	283747_chr_12	Entero_P4	58.5	51.7
NZ_CP030301.1	283747	283747_pla_p283747-1_1	Escher_RCS47	55.6	55.8
NZ_CP030301.1	283747	283747_pla_p283747-1_2	Escher_RCS47	55.6	58
NZ_CP030301.1	283747	283747_pla_p283747-1_3	Escher_RCS47	55.6	52.4
NZ_CP030301.1	283747	283747_pla_p283747-1_4	Salmon_SJ46	55.6	55.2
NZ_CP103676.1	2946	2946_chr_1	Mycoba_Enkosi	58.6	59.3
NZ_CP103676.1	2946	2946_chr_3	Escher_500465_1	58.6	53.2
NZ_CP103676.1	2946	2946_chr_4	Salmon_118970_sal3	58.6	51.6
NZ_CP103676.1	2946	2946_chr_5	Klebsi_3LV2017	58.6	57.5
NZ_CP103676.1	2946	2946_chr_6	Klebsi_4LV2017	58.6	51.6
NZ_CP103677.1	2946	2946_pla_pMB4773_1_1	Escher_RCS47	52.8	53.2
NZ_CP103677.1	2946	2946_pla_pMB4773_1_2	Escher_RCS47	52.8	51.4
NZ_CP028478.1	2e	2e1_chr_1	Escher_500465_1	58.7	56.2
NZ_CP028478.1	2e	2e1_chr_2	Escher_phiV10	58.7	54.7
NZ_CP028478.1	2e	2e1_chr_3	Entero_mEp235	58.7	52.5
NZ_CP028478.1	2e	2e1_chr_4	Klebsi_ST16_OXA48phi5.4	58.7	51.3
NZ_CP028478.1	2e	2e1_chr_5	Escher_SH2026Stx1	58.7	54.5
NZ_CP028478.1	2e	2e1_chr_6	Aggreg_S1249	58.7	46.5
NZ_CP028479.1	2e	2e1_pla_unnamed1_1	Escher_RCS47	51.9	53.1
NZ_CP028480.1	2e	2e1_pla_unnamed2_2	Klebsi_phiKO2	55.3	55.8
NZ_CP040175.1	2e	2e2_chr_1	Escher_500465_1	58.7	54.7
NZ_CP040175.1	2e	2e2_chr_2	Klebsi_phiKO2	58.7	55.4
NZ_CP040175.1	2e	2e2_chr_3	Erwini_vB_EhrS_59	58.7	54.4
NZ_CP040176.1	2e	2e2_pla_unnamed1_2	Salmon_SJ46	53	56.3
NZ_CP040176.1	2e	2e2_pla_unnamed1_4	Escher_RCS47	53	51.3
NZ_CP040177.1	2e	2e2_pla_unnamed2_2	Entero_P1	55.8	53.3
NZ_CP040178.1	2e	2e2_pla_unnamed3_1	Escher_RCS47	53.6	55.7
NZ_CP025541.3	2N3	2N3_chr_1	Erwini_vB_EhrS_59	58.5	53.5
NZ_CP025541.3	2N3	2N3_chr_2	Entero_mEp237	58.5	53.6
NZ_CP025541.3	2N3	2N3_chr_3	Escher_500465_1	58.5	55.9
NZ_CP025541.3	2N3	2N3_chr_4	Klebsi_ST15_OXA48phi14.1	58.5	53.3
NZ_CP027053.1	2_GR_12	2_GR_12_chr_1	Pseudo_OBP	58.4	56.7
NZ_CP027053.1	2_GR_12	2_GR_12_chr_2	Escher_RCS47	58.4	41.7
NZ_CP027053.1	2_GR_12	2_GR_12_chr_3	Entero_Tyrion	58.4	54
NZ_CP027053.1	2_GR_12	2_GR_12_chr_4	Escher_HK639	58.4	53.6
NZ_CP027053.1	2_GR_12	2_GR_12_chr_5	Klebsi_ST512_KPC3phi13.2	58.4	52.3
NZ_CP027053.1	2_GR_12	2_GR_12_chr_6	Erwini_vB_EhrS_59	58.4	53.8
NZ_CP027053.1	2_GR_12	2_GR_12_chr_7	Entero_P4	58.4	56.3
NZ_CP027053.1	2_GR_12	2_GR_12_chr_8	Entero_P4	58.4	51.2
NZ_CP027053.1	2_GR_12	2_GR_12_chr_9	Entero_SfI	58.4	53.6
NZ_CP027055.1	2_GR_12	2_GR_12_pla_IncAC2_1	Escher_RCS47	53.3	52.8
NZ_CP027056.1	2_GR_12	2_GR_12_pla_IncFIB_1	Salmon_SJ46	54.8	56.8
NZ_CP027056.1	2_GR_12	2_GR_12_pla_IncFIB_2	Salmon_SJ46	54.8	55.1
NZ_CP027054.1	2_GR_12	2_GR_12_pla_IncFIB_IncFII_1	Stx2_c_Stx2a_F451	53.9	56.2
NZ_CP027054.1	2_GR_12	2_GR_12_pla_IncFIB_IncFII_2	Escher_RCS47	53.9	57
NZ_CP027054.1	2_GR_12	2_GR_12_pla_IncFIB_IncFII_3	Escher_RCS47	53.9	54.4
NZ_CP027057.1	2_GR_12	2_GR_12_pla_IncX3_1	Escher_RCS47	48.1	57.7
NZ_CP006923.1	30660/NJST258_1	30660NJST258_1_chr_1	Entero_SfI	58.5	54.2
NZ_CP006923.1	30660/NJST258_1	30660NJST258_1_chr_2	Klebsi_ST437_OXA245phi4.1	58.5	54.8
NZ_CP006923.1	30660/NJST258_1	30660NJST258_1_chr_3	Escher_phiV10	58.5	55.2
NZ_CP006923.1	30660/NJST258_1	30660NJST258_1_chr_4	Escher_RCS47	58.5	44.1
NZ_CP006923.1	30660/NJST258_1	30660NJST258_1_chr_5	Salmon_SEN34	58.5	54.5
NZ_CP006923.1	30660/NJST258_1	30660NJST258_1_chr_6	Klebsi_ST512_KPC3phi13.2	58.5	52.4
NZ_CP006923.1	30660/NJST258_1	30660NJST258_1_chr_7	Erwini_vB_EhrS_59	58.5	53.7
NZ_CP006923.1	30660/NJST258_1	30660NJST258_1_chr_8	Entero_P4	58.5	56.3
NZ_CP006923.1	30660/NJST258_1	30660NJST258_1_chr_9	Entero_P4	58.5	57.6
NZ_CP006927.1	30660/NJST258_1	30660NJST258_1_pla_pNJST258N1_1	Escher_RCS47	52.9	59.9
NZ_CP006926.1	30660/NJST258_1	30660NJST258_1_pla_pNJST258N2_1	Entero_P1	55.1	54.6
NZ_CP006926.1	30660/NJST258_1	30660NJST258_1_pla_pNJST258N2_2	Salmon_SJ46	55.1	57.8
NZ_CP006918.1	30684/NJST258_2	30684NJST258_2_chr_1	Entero_SfI	58.6	54.2
NZ_CP006918.1	30684/NJST258_2	30684NJST258_2_chr_2	Klebsi_ST437_OXA245phi4.1	58.6	54.9
NZ_CP006918.1	30684/NJST258_2	30684NJST258_2_chr_3	Escher_RCS47	58.6	44.1
NZ_CP006918.1	30684/NJST258_2	30684NJST258_2_chr_4	Salmon_SEN34	58.6	54.5
NZ_CP006918.1	30684/NJST258_2	30684NJST258_2_chr_5	Klebsi_ST512_KPC3phi13.2	58.6	52.3
NZ_CP006918.1	30684/NJST258_2	30684NJST258_2_chr_6	Escher_phiV10	58.6	55.7
NZ_CP006918.1	30684/NJST258_2	30684NJST258_2_chr_7	Entero_P4	58.6	56.2
NZ_CP006918.1	30684/NJST258_2	30684NJST258_2_chr_8	Entero_P4	58.6	51.4
NZ_CP006918.1	30684/NJST258_2	30684NJST258_2_chr_9	Bacill_vB_BtS_BMBtp14	58.6	59
NZ_CP006922.1	30684/NJST258_2	30684NJST258_2_pla_pNJST258C1_1	Sodali_phiSG1	55.7	57
NZ_CP006922.1	30684/NJST258_2	30684NJST258_2_pla_pNJST258C1_2	Escher_RCS47	55.7	55.6
NZ_CP006919.1	30684/NJST258_2	30684NJST258_2_pla_pNJST258C2_1	Escher_520873	57.5	59.8
NZ_CP030296.1	309074	309074_chr_1	Klebsi_ST437_OXA245phi4.1	58.6	53.8
NZ_CP030296.1	309074	309074_chr_2	Escher_phiV10	58.6	55.5
NZ_CP030296.1	309074	309074_chr_3	Edward_GF_2	58.6	54.7
NZ_CP030296.1	309074	309074_chr_4	Entero_P4	58.6	50.8
NZ_CP030297.1	309074	309074_pla_p309074-1_1	Escher_RCS47	54.5	58.5
NZ_CP030297.1	309074	309074_pla_p309074-1_2	Escher_RCS47	54.5	55.1
NZ_CP030299.1	309074	309074_pla_p309074-3_1	Escher_RCS47	50.2	58.7
NZ_CP028850.1	3214	3214_chr_1	Strept_PapayaSalad	58.5	58.4
NZ_CP028850.1	3214	3214_chr_2	Escher_500465_1	58.5	57.4
NZ_CP028850.1	3214	3214_chr_3	Salmon_SPN1S	58.5	54.7
NZ_CP028850.1	3214	3214_chr_4	Mycoba_Heldan	58.5	58
NZ_CP028850.1	3214	3214_chr_5	Serrat_vB_SmaA_3M	58.5	48.4
NZ_CP028850.1	3214	3214_chr_6	Entero_mEp237	58.5	52.1
NZ_CP028850.1	3214	3214_chr_7	Klebsi_phiKO2	58.5	55.3
NZ_CP028853.1	3214	3214_pla_p3_3214_1	Escher_RCS47	53.7	55.3
NZ_CP028853.1	3214	3214_pla_p3_3214_3	Cronob_ENT39118	53.7	53.1
NZ_CP028855.1	3214	3214_pla_p5_3214_1	Thermo_THSA_485A	47.8	43.8
NZ_CP028851.1	3214	3214_pla_pNDM_3214_1	Salmon_SSU5	47.3	47.4
NZ_CP028851.1	3214	3214_pla_pNDM_3214_2	Entero_mEp237	47.3	43.4
NZ_CP028851.1	3214	3214_pla_pNDM_3214_4	Acinet_vB_AbaM_ME3	47.3	53.8
NZ_CP028852.1	3214	3214_pla_pVIR_3214_1	Pseudo_PMBT3	51.4	51.4
NZ_CP028852.1	3214	3214_pla_pVIR_3214_2	Stx2_c_Stx2a_F451	51.4	53
NZ_CP010361.1	32192	32192_chr_1	Salmon_ST64B	58.6	54.2
NZ_CP010361.1	32192	32192_chr_2	Escher_500465_1	58.6	57.4
NZ_CP010361.1	32192	32192_chr_3	Microc_Ma_LMM01	58.6	44.1
NZ_CP010361.1	32192	32192_chr_4	Salmon_SEN34	58.6	54.5
NZ_CP010361.1	32192	32192_chr_5	Pectob_ZF40	58.6	52.1
NZ_CP010361.1	32192	32192_chr_6	Klebsi_ST512_KPC3phi13.2	58.6	52.4
NZ_CP010361.1	32192	32192_chr_7	Erwini_vB_EhrS_59	58.6	53.7
NZ_CP010361.1	32192	32192_chr_8	Entero_P4	58.6	56.1
NZ_CP010361.1	32192	32192_chr_9	Entero_P4	58.6	51.2
NZ_CP010361.1	32192	32192_chr_10	Bacill_vB_BtS_BMBtp14	58.6	59
NZ_CP010574.1	32192	32192_pla_unnamed_1_1	Escher_RCS47	53.8	60
NZ_CP010574.1	32192	32192_pla_unnamed_1_2	Escher_RCS47	53.8	54.3
NZ_CP010575.1	32192	32192_pla_unnamed_2_1	Salmon_SJ46	55.6	59.4
NZ_CP010575.1	32192	32192_pla_unnamed_2_2	Salmon_SJ46	55.6	56.8
NZ_CP010576.1	32192	32192_pla_unnamed_3_1	Escher_SH2026Stx1	56.4	56
NZ_CP103635.1	3221	3221_chr_1	Klebsi_ST147_VIM1phi7.1	58.5	59.3
NZ_CP103635.1	3221	3221_chr_3	Escher_500465_1	58.5	51.3
NZ_CP103635.1	3221	3221_chr_4	Salmon_118970_sal3	58.5	52
NZ_CP103635.1	3221	3221_chr_5	Klebsi_3LV2017	58.5	57.3
NZ_CP103635.1	3221	3221_chr_6	Erwini_vB_EhrS_59	58.5	54.2
NZ_CP103636.1	3221	3221_pla_pMB6013_1_1	Staphy_SPbeta_like	53.5	54
NZ_CP103636.1	3221	3221_pla_pMB6013_1_4	Escher_RCS47	53.5	55.8
NZ_CP103636.1	3221	3221_pla_pMB6013_1_5	Escher_RCS47	53.5	51.4
NZ_CP099403.1	33221	33221_chr_1	Salmon_Fels_1	58.5	51.7
NZ_CP099403.1	33221	33221_chr_2	Entero_HK140	58.5	53.4
NZ_CP099403.1	33221	33221_chr_3	Salmon_118970_sal3	58.5	51.2
NZ_CP099403.1	33221	33221_chr_4	Stx2_c_1717	58.5	49.9
NZ_CP099403.1	33221	33221_chr_5	Edward_GF_2	58.5	53.2
NZ_CP099405.1	33221	33221_pla_pSKLX33221-2_1	Escher_RCS47	52.9	52.5
NZ_CP099405.1	33221	33221_pla_pSKLX33221-2_2	Escher_SH2026Stx1	52.9	51.4
NZ_CP099405.1	33221	33221_pla_pSKLX33221-2_3	Escher_RCS47	52.9	57
NZ_CP099407.1	33221	33221_pla_pSKLX33221-4_1	Escher_RCS47	53.7	53.6
NZ_CP099407.1	33221	33221_pla_pSKLX33221-4_2	Escher_RCS47	53.7	52.7
NZ_CP099406.1	33221	33221_pla_pSKLX33221_KPC2_1	Salmon_SJ46	55.3	55.4
NZ_CP099406.1	33221	33221_pla_pSKLX33221_KPC2_3	Staphy_Stau2	55.3	60.3
NZ_CP099404.1	33221	33221_pla_pSKLX33221_mcr9_1	Acinet_vB_AbaM_ME3	47.7	51.2
NZ_CP099404.1	33221	33221_pla_pSKLX33221_mcr9_2	Escher_RCS47	47.7	53.1
NZ_CP099413.1	33367	33367_chr_1	Salmon_ST64B	58.5	54.2
NZ_CP099413.1	33367	33367_chr_2	Klebsi_ST437_OXA245phi4.1	58.5	56
NZ_CP099413.1	33367	33367_chr_3	Escher_phiV10	58.5	54.3
NZ_CP099413.1	33367	33367_chr_4	Escher_vB_EcoM_Schickermooser	58.5	55.8
NZ_CP099413.1	33367	33367_chr_5	Salmon_SEN34	58.5	54.5
NZ_CP099413.1	33367	33367_chr_6	Escher_RCS47	58.5	55.1
NZ_CP099413.1	33367	33367_chr_7	Escher_HK639	58.5	54.7
NZ_CP099413.1	33367	33367_chr_9	Entero_c_1	58.5	50.9
NZ_CP099413.1	33367	33367_chr_10	Klebsi_ST512_KPC3phi13.2	58.5	52.4
NZ_CP099413.1	33367	33367_chr_11	Entero_P4	58.5	56.2
NZ_CP099413.1	33367	33367_chr_12	Entero_P4	58.5	53.5
NZ_CP099416.1	33367	33367_pla_pSKLX33367-3_1	Escher_RCS47	55	55.3
NZ_CP099416.1	33367	33367_pla_pSKLX33367-3_2	Escher_RCS47	55	54.4
NZ_CP099415.1	33367	33367_pla_pSKLX33367_KPC2_1	Salmon_SJ46	54.8	52.2
NZ_CP099415.1	33367	33367_pla_pSKLX33367_KPC2_2	Escher_RCS47	54.8	59.7
NZ_CP099415.1	33367	33367_pla_pSKLX33367_KPC2_3	Entero_P1	54.8	55.3
NZ_CP099414.1	33367	33367_pla_pSKLX33367_VIR_1	Escher_RCS47	51	48.2
NZ_CP099414.1	33367	33367_pla_pSKLX33367_VIR_2	Escher_pro483	51	50.7
NZ_CP099414.1	33367	33367_pla_pSKLX33367_VIR_3	Escher_SH2026Stx1	51	54.3
NZ_CP071080.1	3347684I	3347684I_chr_1	Escher_500465_1	58.6	49.9
NZ_CP071080.1	3347684I	3347684I_chr_2	Klebsi_phiKO2	58.6	54.4
NZ_CP071080.1	3347684I	3347684I_chr_4	Escher_HK639	58.6	51
NZ_CP071081.1	3347684I	3347684I_pla_p3347684I_1_1	Escher_RCS47	52.3	56.9
NZ_CP071082.1	3347684I	3347684I_pla_p3347684I_2_1	Salmon_SSU5	50.2	50.2
NZ_CP071083.1	3347684I	3347684I_pla_p3347684I_3_1	Salmon_SJ46	53.6	52.2
NZ_CP071084.1	3347684I	3347684I_pla_p3347684I_4_1	Sodali_phiSG1	55.8	56.7
NZ_CP071086.1	3347689I	3347689I_chr_1	Klebsi_ST437_OXA245phi4.1	58.3	56.1
NZ_CP071086.1	3347689I	3347689I_chr_3	Salmon_118970_sal3	58.3	51.5
NZ_CP071086.1	3347689I	3347689I_chr_4	Salmon_SEN34	58.3	54.6
NZ_CP071086.1	3347689I	3347689I_chr_5	Escher_HK639	58.3	54.5
NZ_CP071086.1	3347689I	3347689I_chr_6	Klebsi_ST512_KPC3phi13.2	58.3	53.4
NZ_CP071086.1	3347689I	3347689I_chr_7	Edward_GF_2	58.3	53.3
NZ_CP071086.1	3347689I	3347689I_chr_8	Entero_P4	58.3	56.3
NZ_CP071086.1	3347689I	3347689I_chr_9	Entero_P4	58.3	52.2
NZ_CP071086.1	3347689I	3347689I_chr_10	Klebsi_3LV2017	58.3	57.1
NZ_CP071087.1	3347689I	3347689I_pla_p3347689I_1_1	Bacill_BM15	52.2	55
NZ_CP071087.1	3347689I	3347689I_pla_p3347689I_1_3	Salmon_SJ46	52.2	52.5
NZ_CP099409.1	33612	33612_chr_1	Salmon_Fels_1	58	49.9
NZ_CP099409.1	33612	33612_chr_2	Escher_RCS47	58	51.9
NZ_CP099409.1	33612	33612_chr_3	Acinet_vB_AbaM_ME3	58	50.8
NZ_CP099409.1	33612	33612_chr_4	Escher_RCS47	58	53.9
NZ_CP099409.1	33612	33612_chr_5	Escher_500465_1	58	54.6
NZ_CP099409.1	33612	33612_chr_6	Entero_HK140	58	53.4
NZ_CP099409.1	33612	33612_chr_7	Salmon_118970_sal3	58	50.9
NZ_CP099409.1	33612	33612_chr_8	Stx2_c_1717	58	49.9
NZ_CP099409.1	33612	33612_chr_9	Edward_GF_2	58	53.3
NZ_CP099410.1	33612	33612_pla_pSKLX33612-1_1	Escher_RCS47	52.9	52.5
NZ_CP099410.1	33612	33612_pla_pSKLX33612-1_2	Paenib_Yerffej	52.9	51.4
NZ_CP099410.1	33612	33612_pla_pSKLX33612-1_3	Klebsi_phiKO2	52.9	57.1
NZ_CP099412.1	33612	33612_pla_pSKLX33612-3_1	Escher_RCS47	53.7	53.6
NZ_CP099412.1	33612	33612_pla_pSKLX33612-3_2	Entero_P1	53.7	52.7
NZ_CP099411.1	33612	33612_pla_pSKLX33612_KPC2_1	Escher_RCS47	55.2	56.2
NZ_CP099411.1	33612	33612_pla_pSKLX33612_KPC2_2	Entero_IME_EC2	55.2	60.3
NZ_CP062792.1	33Kpn12	33Kpn12_chr_1	Klebsi_ST15_OXA48phi14.1	58.5	55.4
NZ_CP062792.1	33Kpn12	33Kpn12_chr_2	Cyanop_KBS_S_2A	58.5	58.7
NZ_CP062792.1	33Kpn12	33Kpn12_chr_3	Escher_500465_1	58.5	55.7
NZ_CP062792.1	33Kpn12	33Kpn12_chr_4	Salmon_118970_sal3	58.5	52.4
NZ_CP062792.1	33Kpn12	33Kpn12_chr_5	Salmon_SEN34	58.5	54.1
NZ_CP062792.1	33Kpn12	33Kpn12_chr_6	Entero_c_1	58.5	51.9
NZ_CP062792.1	33Kpn12	33Kpn12_chr_7	Pseudo_phi297	58.5	53.9
NZ_CP062792.1	33Kpn12	33Kpn12_chr_8	Cronob_ENT47670	58.5	53.5
NZ_CP062792.1	33Kpn12	33Kpn12_chr_9	Entero_P4	58.5	50.3
NZ_CP062793.1	33Kpn12	33Kpn12_pla_p33Kpn12-1_1	Salmon_SJ46	53.8	53.5
NZ_CP069046.1	33Kpn22	33Kpn22_chr_1	Entero_SfI	58.5	54.2
NZ_CP069046.1	33Kpn22	33Kpn22_chr_2	Klebsi_ST437_OXA245phi4.1	58.5	54.9
NZ_CP069046.1	33Kpn22	33Kpn22_chr_3	Escher_phiV10	58.5	54.7
NZ_CP069046.1	33Kpn22	33Kpn22_chr_4	Pseudo_OBP	58.5	57.3
NZ_CP069046.1	33Kpn22	33Kpn22_chr_5	Pectob_ZF40	58.5	53.2
NZ_CP069046.1	33Kpn22	33Kpn22_chr_6	Escher_RCS47	58.5	44.1
NZ_CP069046.1	33Kpn22	33Kpn22_chr_7	Salmon_SEN34	58.5	54.5
NZ_CP069046.1	33Kpn22	33Kpn22_chr_8	Klebsi_ST512_KPC3phi13.2	58.5	52.4
NZ_CP069046.1	33Kpn22	33Kpn22_chr_9	Entero_P4	58.5	56.3
NZ_CP069046.1	33Kpn22	33Kpn22_chr_10	Entero_P4	58.5	57.6
NZ_CP069047.1	33Kpn22	33Kpn22_pla_p33Kpn22-1_1	Escher_RCS47	53.6	60.5
NZ_CP069047.1	33Kpn22	33Kpn22_pla_p33Kpn22-1_2	Escher_RCS47	53.6	53.6
NZ_CP069047.1	33Kpn22	33Kpn22_pla_p33Kpn22-1_3	Escher_RCS47	53.6	56.7
NZ_CP069048.1	33Kpn22	33Kpn22_pla_p33Kpn22-2_1	Lactob_Lj771	45.8	48.5
NZ_CP069049.1	33Kpn22	33Kpn22_pla_p33Kpn22-3_2	Sodali_phiSG1	55.1	56.9
NZ_CP069049.1	33Kpn22	33Kpn22_pla_p33Kpn22-3_3	Escher_RCS47	55.1	57.8
NZ_CP069051.1	33Kpn22	33Kpn22_pla_p33Kpn22-5_1	Escher_RCS47	54.5	54.8
NZ_CP069050.1	33Kpn22	33Kpn22_pla_p33Kpn22-KPC_1	Escher_500465_1	46.5	57.7
NZ_CP034321.1	33	33_chr_1	Escher_500465_1	58.6	57.4
NZ_CP034321.1	33	33_chr_2	Entero_mEp237	58.6	53.9
NZ_CP034321.1	33	33_chr_3	Klebsi_phiKO2	58.6	54.9
NZ_CP034321.1	33	33_chr_4	Klebsi_4LV2017	58.6	49.7
NZ_CP034321.1	33	33_chr_5	Entero_cdtI	58.6	51.3
NZ_CP034322.1	33	33_pla_pK033_1_1	Salmon_SJ46	52.7	53.5
NZ_CP034322.1	33	33_pla_pK033_1_2	Salmon_SJ46	52.7	53.6
NZ_CP010392.1	34618	34618_chr_1	Entero_SfI	58.6	53
NZ_CP010392.1	34618	34618_chr_2	Escher_500465_1	58.6	57.5
NZ_CP010392.1	34618	34618_chr_3	Microc_Ma_LMM01	58.6	44.1
NZ_CP010392.1	34618	34618_chr_4	Salmon_SEN34	58.6	54.5
NZ_CP010392.1	34618	34618_chr_5	Entero_P1	58.6	58.4
NZ_CP010392.1	34618	34618_chr_6	Escher_HK639	58.6	53.6
NZ_CP010392.1	34618	34618_chr_7	Erwini_vB_EhrS_59	58.6	53.7
NZ_CP010392.1	34618	34618_chr_8	Entero_P4	58.6	56.4
NZ_CP010392.1	34618	34618_chr_9	Entero_P4	58.6	51.2
NZ_CP010392.1	34618	34618_chr_10	Bacill_vB_BtS_BMBtp14	58.6	59
NZ_CP010393.1	34618	34618_pla_p34618-207.543kb_1	Salmon_SJ46	54.1	56.6
NZ_CP010393.1	34618	34618_pla_p34618-207.543kb_2	Escher_RCS47	54.1	60
NZ_CP010393.1	34618	34618_pla_p34618-207.543kb_3	Escher_RCS47	54.1	54.4
NZ_CP010393.1	34618	34618_pla_p34618-207.543kb_4	Stx2_c_Stx2a_F451	54.1	53.3
NZ_CP010395.1	34618	34618_pla_p34618-43.380kb_1	Escher_RCS47	48	48.8
NZ_CP010396.1	34618	34618_pla_p34618-71.572kb_3	Salmon_SJ46	56	56.8
NZ_CP103614.1	3571	3571_chr_1	Salmon_118970_sal3	58.6	50.8
NZ_CP103614.1	3571	3571_chr_2	Escher_HK639	58.6	52.2
NZ_CP103614.1	3571	3571_chr_4	Klebsi_ST16_OXA48phi5.4	58.6	52.6
NZ_CP103614.1	3571	3571_chr_5	Klebsi_phiKO2	58.6	54.2
NZ_CP103614.1	3571	3571_chr_6	Entero_P4	58.6	49.7
NZ_CP103615.1	3571	3571_pla_pMB6975_1_1	Salmon_SJ46	53	54.4
NZ_CP103615.1	3571	3571_pla_pMB6975_1_3	Escher_RCS47	53	54.5
NZ_CP082759.1	36	36_chr_1	Salmon_ST64B	58.5	54.2
NZ_CP082759.1	36	36_chr_2	Klebsi_ST437_OXA245phi4.1	58.5	56
NZ_CP082759.1	36	36_chr_3	Escher_phiV10	58.5	54.1
NZ_CP082759.1	36	36_chr_4	Entero_phi92	58.5	55.8
NZ_CP082759.1	36	36_chr_5	Salmon_SEN34	58.5	54.9
NZ_CP082759.1	36	36_chr_6	Entero_P1	58.5	55.1
NZ_CP082759.1	36	36_chr_7	Escher_HK639	58.5	54.5
NZ_CP082759.1	36	36_chr_8	Klebsi_phiKO2	58.5	55.2
NZ_CP082759.1	36	36_chr_9	Entero_mEp237	58.5	48.7
NZ_CP082759.1	36	36_chr_10	Entero_c_1	58.5	51.5
NZ_CP082759.1	36	36_chr_11	Klebsi_ST512_KPC3phi13.2	58.5	52.4
NZ_CP082759.1	36	36_chr_12	Entero_P4	58.5	56.2
NZ_CP082759.1	36	36_chr_13	Entero_P4	58.5	54.8
NZ_CP082761.1	36	36_pla_pKP36-KPC_1	Salmon_SJ46	54.5	52
NZ_CP082761.1	36	36_pla_pKP36-KPC_2	Escher_RCS47	54.5	58.4
NZ_CP082761.1	36	36_pla_pKP36-KPC_3	Entero_P1	54.5	55.3
NZ_CP082760.1	36	36_pla_pKP36-vir_1	Escher_520873	51.2	50.2
NZ_CP082760.1	36	36_pla_pKP36-vir_2	Escher_RCS47	51.2	49.2
NZ_CP082760.1	36	36_pla_pKP36-vir_3	Entero_HK225	51.2	50.7
NZ_CP082760.1	36	36_pla_pKP36-vir_4	Escher_SH2026Stx1	51.2	54.4
NZ_CP082762.1	36	36_pla_pKP36_4_1	Escher_RCS47	55	56.4
NZ_CP082753.1	37	37_chr_1	Salmon_ST64B	58.5	54.2
NZ_CP082753.1	37	37_chr_2	Klebsi_ST437_OXA245phi4.1	58.5	56
NZ_CP082753.1	37	37_chr_3	Escher_phiV10	58.5	54.1
NZ_CP082753.1	37	37_chr_4	Entero_phi92	58.5	55.8
NZ_CP082753.1	37	37_chr_5	Salmon_SEN34	58.5	54.9
NZ_CP082753.1	37	37_chr_6	Escher_RCS47	58.5	55.1
NZ_CP082753.1	37	37_chr_7	Escher_HK639	58.5	54.5
NZ_CP082753.1	37	37_chr_9	Entero_c_1	58.5	50.9
NZ_CP082753.1	37	37_chr_10	Klebsi_ST512_KPC3phi13.2	58.5	52.4
NZ_CP082753.1	37	37_chr_11	Entero_P4	58.5	56.2
NZ_CP082753.1	37	37_chr_12	Entero_P4	58.5	54.8
NZ_CP082755.1	37	37_pla_pKP37-KPC_1	Salmon_SJ46	54.5	52
NZ_CP082755.1	37	37_pla_pKP37-KPC_2	Escher_RCS47	54.5	58.5
NZ_CP082755.1	37	37_pla_pKP37-KPC_3	Entero_P1	54.5	55.3
NZ_CP082754.1	37	37_pla_pKP37-vir_1	Escher_520873	51.5	50.2
NZ_CP082754.1	37	37_pla_pKP37-vir_2	Escher_RCS47	51.5	49.4
NZ_CP082754.1	37	37_pla_pKP37-vir_3	Escher_ESCO13	51.5	50.7
NZ_CP082754.1	37	37_pla_pKP37-vir_4	Escher_SH2026Stx1	51.5	54.4
NZ_CP082756.1	37	37_pla_pKP37_4_1	Salmon_SJ46	55.1	57.5
NZ_CP054268.1	39427	39427_chr_1	Shigel_SfIV	58.5	54.2
NZ_CP054268.1	39427	39427_chr_2	Klebsi_ST437_OXA245phi4.1	58.5	54.9
NZ_CP054268.1	39427	39427_chr_3	Escher_phiV10	58.5	54
NZ_CP054268.1	39427	39427_chr_4	Microc_MaMV_DC	58.5	44.1
NZ_CP054268.1	39427	39427_chr_5	Salmon_SEN34	58.5	54.5
NZ_CP054268.1	39427	39427_chr_6	Cronob_ENT39118	58.5	58.5
NZ_CP054268.1	39427	39427_chr_7	Escher_HK639	58.5	53.6
NZ_CP054268.1	39427	39427_chr_8	Klebsi_ST512_KPC3phi13.2	58.5	52.2
NZ_CP054268.1	39427	39427_chr_9	Erwini_vB_EhrS_59	58.5	53.7
NZ_CP054268.1	39427	39427_chr_10	Entero_P4	58.5	54.5
NZ_CP054268.1	39427	39427_chr_11	Entero_P4	58.5	51.2
NZ_CP054268.1	39427	39427_chr_12	Bacill_vB_BtS_BMBtp14	58.5	59
NZ_CP054265.1	39427	39427_pla_pKPN39427.1_1	Klebsi_vB_KpnS_IME279	53.8	55.6
NZ_CP054265.1	39427	39427_pla_pKPN39427.1_2	Stx2_c_1717	53.8	56.2
NZ_CP054265.1	39427	39427_pla_pKPN39427.1_3	Escher_RCS47	53.8	60
NZ_CP054265.1	39427	39427_pla_pKPN39427.1_4	Escher_RCS47	53.8	53.3
NZ_CP054266.1	39427	39427_pla_pKPN39427.2_1	Salmon_SJ46	54.5	55.1
NZ_CP054266.1	39427	39427_pla_pKPN39427.2_2	Salmon_SJ46	54.5	57.6
NZ_CP056029.1	39428	39428_chr_1	Salmon_ST64B	58.6	54.2
NZ_CP056029.1	39428	39428_chr_2	Escher_500465_1	58.6	57.4
NZ_CP056029.1	39428	39428_chr_3	Microc_Ma_LMM01	58.6	44.1
NZ_CP056029.1	39428	39428_chr_4	Salmon_SEN34	58.6	53.9
NZ_CP056029.1	39428	39428_chr_5	Pectob_ZF40	58.6	52
NZ_CP056029.1	39428	39428_chr_6	Klebsi_ST512_KPC3phi13.2	58.6	52.4
NZ_CP056029.1	39428	39428_chr_7	Erwini_vB_EhrS_59	58.6	53.7
NZ_CP056029.1	39428	39428_chr_8	Entero_P4	58.6	56.3
NZ_CP056029.1	39428	39428_chr_9	Entero_P4	58.6	51.5
NZ_CP056029.1	39428	39428_chr_10	Escher_503458	58.6	59
NZ_CP056025.1	39428	39428_pla_pKPN39428.1_1	Escher_RCS47	54.1	59.2
NZ_CP056025.1	39428	39428_pla_pKPN39428.1_3	Escher_RCS47	54.1	55.5
NZ_CP056026.1	39428	39428_pla_pKPN39428.2_1	Salmon_SJ46	54.9	56.6
NZ_CP103548.1	3987	3987_chr_1	Salmon_SJ46	58.3	52
NZ_CP103548.1	3987	3987_chr_2	Klebsi_3LV2017	58.3	55.9
NZ_CP103548.1	3987	3987_chr_3	Salmon_118970_sal3	58.3	52.2
NZ_CP103548.1	3987	3987_chr_4	Escher_500465_1	58.3	51.1
NZ_CP103548.1	3987	3987_chr_6	Clostr_phiCPV4	58.3	56
NZ_CP103548.1	3987	3987_chr_7	Erwini_vB_EhrS_59	58.3	54.2
NZ_CP103548.1	3987	3987_chr_8	Salmon_SJ46	58.3	52.7
NZ_CP103548.1	3987	3987_chr_9	Entero_P1	58.3	51.2
NZ_CP083047.1	400195-1-18	400195-1-18_chr_1	Salmon_ST64B	58.5	53.6
NZ_CP083047.1	400195-1-18	400195-1-18_chr_2	Escher_HK639	58.5	53.2
NZ_CP083047.1	400195-1-18	400195-1-18_chr_3	Entero_phiP27	58.5	53.2
NZ_CP083047.1	400195-1-18	400195-1-18_chr_4	Erwini_vB_EhrS_59	58.5	54.1
NZ_CP083047.1	400195-1-18	400195-1-18_chr_5	Entero_HK106	58.5	54.3
NZ_CP083047.1	400195-1-18	400195-1-18_chr_6	Klebsi_ST16_OXA48phi5.4	58.5	52.1
NZ_CP083048.1	400195-1-18	400195-1-18_pla_p1-400195-1-18_1	Escher_RCS47	47.2	46.1
NZ_CP083048.1	400195-1-18	400195-1-18_pla_p1-400195-1-18_2	Stx2_c_Stx2a_F451	47.2	51.6
NZ_CP083048.1	400195-1-18	400195-1-18_pla_p1-400195-1-18_3	Salmon_SJ46	47.2	55.2
NZ_CP083048.1	400195-1-18	400195-1-18_pla_p1-400195-1-18_4	Escher_RCS47	47.2	44.6
NZ_CP083048.1	400195-1-18	400195-1-18_pla_p1-400195-1-18_5	Pseudo_nickie	47.2	45.7
NZ_CP083049.1	400195-1-18	400195-1-18_pla_p2-400195-1-18_1	Escher_SH2026Stx1	53.4	53.8
NZ_CP083049.1	400195-1-18	400195-1-18_pla_p2-400195-1-18_2	Escher_SH2026Stx1	53.4	51.3
NZ_CP083049.1	400195-1-18	400195-1-18_pla_p2-400195-1-18_3	Escher_RCS47	53.4	57.2
NZ_CP083049.1	400195-1-18	400195-1-18_pla_p2-400195-1-18_4	Escher_RCS47	53.4	55.5
NZ_CP083043.1	400195-2-18	400195-2-18_chr_1	Salmon_118970_sal3	58.5	53.6
NZ_CP083043.1	400195-2-18	400195-2-18_chr_2	Escher_HK639	58.5	53.2
NZ_CP083043.1	400195-2-18	400195-2-18_chr_3	Entero_phiP27	58.5	53.2
NZ_CP083043.1	400195-2-18	400195-2-18_chr_4	Erwini_vB_EhrS_59	58.5	54.1
NZ_CP083043.1	400195-2-18	400195-2-18_chr_5	Entero_HK106	58.5	54.3
NZ_CP083043.1	400195-2-18	400195-2-18_chr_6	Klebsi_ST16_OXA48phi5.4	58.5	52.1
NZ_CP083044.1	400195-2-18	400195-2-18_pla_p1-400195-2-18_1	Escher_RCS47	47.2	46.1
NZ_CP083044.1	400195-2-18	400195-2-18_pla_p1-400195-2-18_2	Escher_SH2026Stx1	47.2	51.6
NZ_CP083044.1	400195-2-18	400195-2-18_pla_p1-400195-2-18_3	Salmon_SJ46	47.2	55.2
NZ_CP083044.1	400195-2-18	400195-2-18_pla_p1-400195-2-18_4	Escher_RCS47	47.2	44.6
NZ_CP083044.1	400195-2-18	400195-2-18_pla_p1-400195-2-18_5	Entero_mEp237	47.2	45.7
NZ_CP083045.1	400195-2-18	400195-2-18_pla_p2-400195-2-18_1	Stx2_c_Stx2a_F451	53.4	53.8
NZ_CP083045.1	400195-2-18	400195-2-18_pla_p2-400195-2-18_2	Stx2_c_Stx2a_F451	53.4	51.3
NZ_CP083045.1	400195-2-18	400195-2-18_pla_p2-400195-2-18_3	Escher_RCS47	53.4	57.2
NZ_CP083045.1	400195-2-18	400195-2-18_pla_p2-400195-2-18_4	Escher_RCS47	53.4	55.5
NZ_CP103579.1	4014	4014_chr_1	Klebsi_ST147_VIM1phi7.1	58.6	53.1
NZ_CP103579.1	4014	4014_chr_2	Escher_500465_1	58.6	55.2
NZ_CP103579.1	4014	4014_chr_3	Entero_mEp237	58.6	51.5
NZ_CP103579.1	4014	4014_chr_4	Klebsi_phiKO2	58.6	54.7
NZ_CP103579.1	4014	4014_chr_5	Klebsi_4LV2017	58.6	52
NZ_CP103579.1	4014	4014_chr_7	Salmon_SJ46	58.6	54
NZ_CP103579.1	4014	4014_chr_8	Escher_503458	58.6	59.3
NZ_CP103580.1	4014	4014_pla_pMB7964_1_1	Salmon_SJ46	53	54.4
NZ_CP103580.1	4014	4014_pla_pMB7964_1_3	Escher_RCS47	53	54.5
NZ_CP023839.1	4/1-2	41-2_chr_1	Klebsi_ST147_VIM1phi7.1	58.4	53.8
NZ_CP023839.1	4/1-2	41-2_chr_2	Salmon_118970_sal3	58.4	51.5
NZ_CP023839.1	4/1-2	41-2_chr_3	Synech_S_TIP37	58.4	51.4
NZ_CP023839.1	4/1-2	41-2_chr_4	Entero_mEp237	58.4	52.5
NZ_CP023839.1	4/1-2	41-2_chr_5	Escher_503458	58.4	59.1
NZ_CP023840.1	4/1-2	41-2_pla_p4_1_2.1_1	Escher_RCS47	52.4	56.6
NZ_CP023840.1	4/1-2	41-2_pla_p4_1_2.1_2	Salmon_SJ46	52.4	55.9
NZ_CP023841.1	4/1-2	41-2_pla_p4_1_2.2_1	Escher_RCS47	52.9	53.4
NZ_CP023841.1	4/1-2	41-2_pla_p4_1_2.2_2	Salmon_SJ46	52.9	48.8
NZ_CP068618.1	41968	41968_chr_1	Salmon_ST64B	58.6	53
NZ_CP068618.1	41968	41968_chr_2	Escher_500465_1	58.6	57.4
NZ_CP068618.1	41968	41968_chr_3	Microc_MaMV_DC	58.6	44.1
NZ_CP068618.1	41968	41968_chr_4	Salmon_SEN34	58.6	54.5
NZ_CP068618.1	41968	41968_chr_6	Escher_HK639	58.6	53.7
NZ_CP068618.1	41968	41968_chr_7	Pectob_ZF40	58.6	52.1
NZ_CP068618.1	41968	41968_chr_8	Klebsi_ST512_KPC3phi13.2	58.6	52.6
NZ_CP068618.1	41968	41968_chr_9	Entero_P4	58.6	56.4
NZ_CP068618.1	41968	41968_chr_10	Entero_P4	58.6	51.2
NZ_CP068618.1	41968	41968_chr_11	Escher_503458	58.6	59
NZ_CP068620.1	41968	41968_pla_p41968-206.6_2	Escher_SH2026Stx1	54	55.9
NZ_CP068620.1	41968	41968_pla_p41968-206.6_3	Escher_RCS47	54	55.4
NZ_CP068621.1	41968	41968_pla_p41968-R65.8_2	Escher_RCS47	56.5	56.4
NZ_CP068614.1	42362	42362_chr_1	Shigel_SfIV	58.4	54.2
NZ_CP068614.1	42362	42362_chr_2	Escher_RCS47	58.4	48.7
NZ_CP068614.1	42362	42362_chr_3	Escher_500465_1	58.4	57.4
NZ_CP068614.1	42362	42362_chr_4	Escher_phiV10	58.4	54.1
NZ_CP068614.1	42362	42362_chr_5	Microc_Ma_LMM01	58.4	44.1
NZ_CP068614.1	42362	42362_chr_6	Escher_RCS47	58.4	60.8
NZ_CP068614.1	42362	42362_chr_7	Salmon_SEN34	58.4	54.5
NZ_CP068614.1	42362	42362_chr_8	Salmon_vB_SosS_Oslo	58.4	58.5
NZ_CP068614.1	42362	42362_chr_9	Escher_HK639	58.4	53.7
NZ_CP068614.1	42362	42362_chr_10	Pectob_ZF40	58.4	52.1
NZ_CP068614.1	42362	42362_chr_11	Klebsi_ST512_KPC3phi13.2	58.4	52.4
NZ_CP068614.1	42362	42362_chr_12	Erwini_vB_EhrS_59	58.4	53.7
NZ_CP068614.1	42362	42362_chr_13	Entero_P4	58.4	56.2
NZ_CP068614.1	42362	42362_chr_14	Entero_P4	58.4	51.5
NZ_CP068616.1	42362	42362_pla_p42362-207.2_1	Escher_RCS47	54	60.5
NZ_CP068616.1	42362	42362_pla_p42362-207.2_2	Stx2_c_Stx2a_F451	54	55.4
NZ_CP068616.1	42362	42362_pla_p42362-207.2_3	Escher_RCS47	54	55.2
NZ_CP068617.1	42362	42362_pla_p42362-R67.9_2	Escher_RCS47	56.1	55.7
NZ_CP103621.1	433	433_chr_1	Escher_500465_1	58.6	55.5
NZ_CP103621.1	433	433_chr_2	Salmon_SJ46	58.6	54
NZ_CP103621.1	433	433_chr_3	Klebsi_ST15_OXA48phi14.1	58.6	52.5
NZ_CP103621.1	433	433_chr_4	Klebsi_4LV2017	58.6	50.6
NZ_CP103622.1	433	433_pla_pMB6483_1_1	Shigel_SfII	54.1	51.4
NZ_CP103622.1	433	433_pla_pMB6483_1_2	Salmon_SJ46	54.1	57.6
NZ_CP103622.1	433	433_pla_pMB6483_1_3	Escher_RCS47	54.1	59
NZ_CP103622.1	433	433_pla_pMB6483_1_4	Escher_RCS47	54.1	51.2
NZ_CP103618.1	4383	4383_chr_1	Escher_500465_1	58.4	57.4
NZ_CP103618.1	4383	4383_chr_2	Entero_N15	58.4	51.1
NZ_CP103618.1	4383	4383_chr_3	Salmon_118970_sal3	58.4	52.1
NZ_CP103618.1	4383	4383_chr_4	Klebsi_ST16_OXA48phi5.4	58.4	51.8
NZ_CP103619.1	4383	4383_pla_pMB6487_1_1	Escher_RCS47	53.6	60.5
NZ_CP103619.1	4383	4383_pla_pMB6487_1_2	Salmon_SJ46	53.6	55.1
NZ_CP103619.1	4383	4383_pla_pMB6487_1_3	Escher_RCS47	53.6	54.3
NZ_CP103605.1	4386	4386_chr_1	Escher_500465_1	58.6	57.5
NZ_CP103605.1	4386	4386_chr_2	Klebsi_phiKO2	58.6	52.3
NZ_CP103606.1	4386	4386_pla_pMB7231_1_2	Staphy_SPbeta_like	52.9	52.6
NZ_CP103606.1	4386	4386_pla_pMB7231_1_3	Escher_RCS47	52.9	52
NZ_CP103606.1	4386	4386_pla_pMB7231_1_4	Salmon_vB_SosS_Oslo	52.9	57
NZ_CP103607.1	4386	4386_pla_pMB7231_2_1	Escher_RCS47	54.9	56.7
NZ_CP068610.1	45706	45706_chr_1	Shigel_SfII	58.6	53
NZ_CP068610.1	45706	45706_chr_2	Escher_500465_1	58.6	57.4
NZ_CP068610.1	45706	45706_chr_3	Escher_phiV10	58.6	54.2
NZ_CP068610.1	45706	45706_chr_4	Microc_Ma_LMM01	58.6	44.1
NZ_CP068610.1	45706	45706_chr_5	Salmon_SEN34	58.6	54.5
NZ_CP068610.1	45706	45706_chr_6	Salmon_vB_SosS_Oslo	58.6	58.4
NZ_CP068610.1	45706	45706_chr_7	Escher_HK639	58.6	53.6
NZ_CP068610.1	45706	45706_chr_8	Erwini_vB_EhrS_59	58.6	53.7
NZ_CP068610.1	45706	45706_chr_9	Entero_P4	58.6	56.4
NZ_CP068610.1	45706	45706_chr_10	Entero_P4	58.6	51.2
NZ_CP068610.1	45706	45706_chr_11	Escher_503458	58.6	59
NZ_CP068612.1	45706	45706_pla_p45706-43.4_1	Escher_RCS47	48.1	48.4
NZ_CP068613.1	45706	45706_pla_p45706-R73.3_2	Salmon_SJ46	55.9	55.6
NZ_CP018306.1	459	459_chr_1	Entero_phi92	58.5	50.6
NZ_CP018306.1	459	459_chr_2	Salmon_SEN34	58.5	53.6
NZ_CP018306.1	459	459_chr_3	Escher_500465_1	58.5	55.1
NZ_CP018306.1	459	459_chr_4	Entero_mEp235	58.5	53.9
NZ_CP018306.1	459	459_chr_5	Klebsi_ST16_OXA48phi5.4	58.5	51.4
NZ_CP018306.1	459	459_chr_6	Entero_mEp237	58.5	53
NZ_CP018306.1	459	459_chr_7	Synech_Bellamy	58.5	47.8
NZ_CP042318.1	46-16	46-16_chr_1	Salmon_118970_sal3	58.7	54.1
NZ_CP042318.1	46-16	46-16_chr_2	Entero_P4	58.7	52.1
NZ_CP042318.1	46-16	46-16_chr_3	Entero_P4	58.7	53.6
NZ_CP042318.1	46-16	46-16_chr_4	Erwini_vB_EhrS_59	58.7	53.8
NZ_CP042318.1	46-16	46-16_chr_5	Klebsi_ST512_KPC3phi13.2	58.7	50.6
NZ_CP042318.1	46-16	46-16_chr_6	Salmon_SEN34	58.7	53
NZ_CP042318.1	46-16	46-16_chr_7	Microc_MaMV_DC	58.7	44.2
NZ_CP042318.1	46-16	46-16_chr_8	Escher_500465_1	58.7	58.1
NZ_CP103567.1	4680	4680_chr_1	Staphy_SPbeta_like	58.6	55.2
NZ_CP103567.1	4680	4680_chr_2	Escher_RCS47	58.6	53.1
NZ_CP103567.1	4680	4680_chr_3	Salmon_SJ46	58.6	52.5
NZ_CP103567.1	4680	4680_chr_4	Escher_500465_1	58.6	57.5
NZ_CP103567.1	4680	4680_chr_5	Klebsi_phiKO2	58.6	52.3
NZ_CP103568.1	4680	4680_pla_pMB8190_1_2	Salmon_SJ46	53.4	52.8
NZ_CP103568.1	4680	4680_pla_pMB8190_1_3	Salmon_vB_SosS_Oslo	53.4	56.3
NZ_CP103568.1	4680	4680_pla_pMB8190_1_4	Escher_RCS47	53.4	52.2
NZ_CP088120.1	46	46_chr_1	Salmon_ST64B	58.7	54.2
NZ_CP088120.1	46	46_chr_2	Escher_500465_1	58.7	57.4
NZ_CP088120.1	46	46_chr_3	Escher_RCS47	58.7	44.7
NZ_CP088120.1	46	46_chr_4	Bacter_APSE_2	58.7	57.8
NZ_CP088120.1	46	46_chr_5	Cronob_ESSI_2	58.7	55.8
NZ_CP088120.1	46	46_chr_6	Klebsi_4LV2017	58.7	52.4
NZ_CP088120.1	46	46_chr_7	Entero_P4	58.7	56.3
NZ_CP088120.1	46	46_chr_8	Entero_P4	58.7	51.5
NZ_CP088120.1	46	46_chr_9	Escher_503458	58.7	58.9
NZ_CP088121.1	46	46_pla_pKP46-3_1	Escher_Av_05	47.8	46.9
NZ_CP088121.1	46	46_pla_pKP46-3_2	Salmon_SJ46	47.8	52.9
NZ_CP088121.1	46	46_pla_pKP46-3_4	Lactob_Semele	47.8	44.4
NZ_CP088121.1	46	46_pla_pKP46-3_5	Entero_mEp237	47.8	45.7
NZ_CP088122.1	46	46_pla_pKP46-4_1	Salmon_SJ46	53.4	50.5
NZ_CP088123.1	46	46_pla_pKP46-5_1	Escher_RCS47	53.7	52.9
NZ_CP088123.1	46	46_pla_pKP46-5_3	Salmon_SJ46	53.7	53.9
NZ_CP088124.1	46	46_pla_pKP46-mcr10_1	Escher_RCS47	52.9	51.1
NZ_CP088124.1	46	46_pla_pKP46-mcr10_2	Escher_RCS47	52.9	52.7
NZ_CP088124.1	46	46_pla_pKP46-mcr10_3	Escher_RCS47	52.9	57.1
NZ_CP103586.1	4737	4737_chr_1	Synech_S_CBS1	58.6	59.3
NZ_CP103586.1	4737	4737_chr_3	Escher_500465_1	58.6	53.2
NZ_CP103586.1	4737	4737_chr_4	Salmon_SEN34	58.6	54.6
NZ_CP103586.1	4737	4737_chr_5	Klebsi_3LV2017	58.6	57.5
NZ_CP103586.1	4737	4737_chr_6	Klebsi_4LV2017	58.6	53
NZ_CP103586.1	4737	4737_chr_7	Erwini_vB_EhrS_59	58.6	54.3
NZ_CP103587.1	4737	4737_pla_pMB7606_1_1	Staphy_SPbeta_like	52.3	52.4
NZ_CP103587.1	4737	4737_pla_pMB7606_1_2	Escher_RCS47	52.3	53.4
NZ_CP103587.1	4737	4737_pla_pMB7606_1_3	Escher_RCS47	52.3	51.4
NZ_CP033625.1	4743	4743_chr_1	Klebsi_4LV2017	58.4	51.6
NZ_CP033625.1	4743	4743_chr_2	Escher_500465_1	58.4	57.6
NZ_CP033625.1	4743	4743_chr_3	Salmon_vB_SosS_Oslo	58.4	52.6
NZ_CP033625.1	4743	4743_chr_4	Escher_phiV10	58.4	53.4
NZ_CP033625.1	4743	4743_chr_5	Salmon_118970_sal3	58.4	52.8
NZ_CP033625.1	4743	4743_chr_6	Klebsi_3LV2017	58.4	56.3
NZ_CP033625.1	4743	4743_chr_7	Erwini_vB_EhrS_59	58.4	53.6
NZ_CP033625.1	4743	4743_chr_8	Entero_P4	58.4	48.4
NZ_CP033626.1	4743	4743_pla_unnamed1_1	Salmon_vB_SosS_Oslo	53.2	52.6
NZ_CP033627.1	4743	4743_pla_unnamed2_1	Escher_RCS47	53.7	60.5
NZ_CP033627.1	4743	4743_pla_unnamed2_2	Stx2_c_Stx2a_F451	53.7	55.9
NZ_CP033627.1	4743	4743_pla_unnamed2_3	Escher_RCS47	53.7	57.4
NZ_CP033628.1	4743	4743_pla_unnamed3_1	Salmon_SJ46	53.9	57.4
NZ_CP033629.1	4743	4743_pla_unnamed4_1	Escher_RCS47	52.8	51.4
NZ_CP033624.1	4743	4743_pla_unnamed6_1	Klebsi_phiKO2	53.7	53.6
NZ_CP050360.1	47733	47733_chr_1	Entero_mEp237	58.5	52.9
NZ_CP050360.1	47733	47733_chr_2	Salmon_118970_sal3	58.5	52.5
NZ_CP050360.1	47733	47733_chr_3	Entero_c_1	58.5	52
NZ_CP050360.1	47733	47733_chr_4	Escher_500465_1	58.5	57.7
NZ_CP050360.1	47733	47733_chr_5	Klebsi_ST147_VIM1phi7.1	58.5	53.1
NZ_CP050360.1	47733	47733_chr_6	Escher_503458	58.5	58.9
NZ_CP050366.1	47733	47733_pla_p47733L_1	Klebsi_phiKO2	53.9	54
NZ_CP050361.1	47733	47733_pla_p47733_ARR2_1	Salmon_SJ46	54.2	52.2
NZ_CP050364.1	47733	47733_pla_p47733_CTX_M_15_1	Escher_RCS47	54.2	52.6
NZ_CP050364.1	47733	47733_pla_p47733_CTX_M_15_3	Escher_RCS47	54.2	55.2
NZ_CP050365.1	47733	47733_pla_p47733_IncFIB_1	Salmon_SSU5	50.6	50.6
NZ_CP050367.1	47733	47733_pla_p47733_NDM_5_1	Escher_RCS47	53.6	53.2
NZ_CP083036.1	4906.28	4906.28_chr_1	Escher_500465_1	58.3	56.2
NZ_CP083036.1	4906.28	4906.28_chr_2	Entero_phiP27	58.3	52.4
NZ_CP083036.1	4906.28	4906.28_chr_3	Escher_phiV10	58.3	53.4
NZ_CP083036.1	4906.28	4906.28_chr_4	Salmon_118970_sal3	58.3	52.7
NZ_CP083036.1	4906.28	4906.28_chr_5	Klebsi_3LV2017	58.3	56.2
NZ_CP083036.1	4906.28	4906.28_chr_6	Salmon_SEN34	58.3	55.1
NZ_CP083036.1	4906.28	4906.28_chr_7	Klebsi_ST437_OXA245phi4.1	58.3	53.6
NZ_CP083036.1	4906.28	4906.28_chr_8	Klebsi_phiKO2	58.3	54.3
NZ_CP083036.1	4906.28	4906.28_chr_9	Erwini_vB_EhrS_59	58.3	53.9
NZ_CP083037.1	4906.28	4906.28_pla_p1-4906.28_1	Microc_MaMV_DC	52.8	56
NZ_CP083037.1	4906.28	4906.28_pla_p1-4906.28_2	Salmon_SJ46	52.8	54.6
NZ_CP083037.1	4906.28	4906.28_pla_p1-4906.28_3	Paenib_Yerffej	52.8	52.2
NZ_CP083037.1	4906.28	4906.28_pla_p1-4906.28_4	Escher_RCS47	52.8	51.1
NZ_CP083038.1	4906.28	4906.28_pla_p2-4906.28-OXA48_1	Cronob_ENT39118	52.4	51.9
NZ_CP083039.1	4906.28	4906.28_pla_p3-4906.28_1	Klebsi_phiKO2	54.2	53.5
NZ_CP088997.1	49088	49088_chr_1	Entero_SfI	58.5	54.2
NZ_CP088997.1	49088	49088_chr_2	Klebsi_ST437_OXA245phi4.1	58.5	56
NZ_CP088997.1	49088	49088_chr_3	Escher_phiV10	58.5	54.3
NZ_CP088997.1	49088	49088_chr_4	Escher_ESCO5	58.5	51.6
NZ_CP088997.1	49088	49088_chr_5	Salmon_118970_sal3	58.5	52.8
NZ_CP088997.1	49088	49088_chr_6	Salmon_SPN3UB	58.5	48.3
NZ_CP088997.1	49088	49088_chr_7	Escher_HK639	58.5	55.5
NZ_CP088997.1	49088	49088_chr_8	Salmon_SEN34	58.5	52.7
NZ_CP088997.1	49088	49088_chr_9	Salmon_118970_sal3	58.5	52.3
NZ_CP088997.1	49088	49088_chr_10	Klebsi_ST512_KPC3phi13.2	58.5	52.6
NZ_CP088997.1	49088	49088_chr_11	Entero_P4	58.5	56.2
NZ_CP088997.1	49088	49088_chr_12	Entero_P4	58.5	53.5
NZ_CP088999.1	49088	49088_pla_p49088-116.5_1	Entero_phi80	52.2	50.5
NZ_CP088999.1	49088	49088_pla_p49088-116.5_2	Escher_SH2026Stx1	52.2	54.4
NZ_CP089000.1	49088	49088_pla_p49088-279.2_1	Salmon_SJ46	52.8	52.2
NZ_CP089000.1	49088	49088_pla_p49088-279.2_2	Escher_RCS47	52.8	55.9
NZ_CP089000.1	49088	49088_pla_p49088-279.2_3	Salmon_SJ46	52.8	55.2
NZ_CP089000.1	49088	49088_pla_p49088-279.2_4	Escher_RCS47	52.8	55.7
NZ_CP089024.1	49210	49210_chr_1	Escher_500465_1	58.4	57.4
NZ_CP089024.1	49210	49210_chr_2	Erwini_vB_EhrS_59	58.4	54.5
NZ_CP089024.1	49210	49210_chr_3	Salmon_SPN1S	58.4	55.4
NZ_CP089024.1	49210	49210_chr_4	Mycoba_Heldan	58.4	58
NZ_CP089024.1	49210	49210_chr_5	Edward_GF_2	58.4	54.3
NZ_CP089024.1	49210	49210_chr_6	Salmon_Fels_1	58.4	54.4
NZ_CP089024.1	49210	49210_chr_7	Ralsto_RSY1	58.4	48.4
NZ_CP089024.1	49210	49210_chr_8	Klebsi_phiKO2	58.4	55.3
NZ_CP089028.1	49210	49210_pla_p49210-107.8_1	Escher_RCS47	53.1	54.6
NZ_CP089028.1	49210	49210_pla_p49210-107.8_2	Escher_RCS47	53.1	53.8
NZ_CP089029.1	49210	49210_pla_p49210-124.9_1	Salmon_SJ46	53.8	54.1
NZ_CP089029.1	49210	49210_pla_p49210-124.9_2	Cronob_ENT39118	53.8	54.6
NZ_CP089030.1	49210	49210_pla_p49210-229.3_1	Escher_ESCO13	51.2	50.7
NZ_CP089030.1	49210	49210_pla_p49210-229.3_2	Escher_SH2026Stx1	51.2	54.3
NZ_CP089027.1	49210	49210_pla_p49210-63.4_1	Salmon_vB_SosS_Oslo	52.3	52
NZ_CP097232.1	4	4_chr_1	Erwini_vB_EhrS_59	58.6	55.7
NZ_CP097232.1	4	4_chr_2	Escher_500465_1	58.6	57.4
NZ_CP097232.1	4	4_chr_4	Escher_HK639	58.6	53.6
NZ_CP097232.1	4	4_chr_5	Entero_phiP27	58.6	53.2
NZ_CP097234.1	4	4_pla_p103.7_1	Escher_SH2026Stx1	52.2	56.5
NZ_CP097234.1	4	4_pla_p103.7_2	Escher_RCS47	52.2	54.4
NZ_CP097233.1	4	4_pla_p284.7_1	Pseudo_nickie	47.7	45.6
NZ_CP097233.1	4	4_pla_p284.7_2	Escher_RCS47	47.7	49.3
NZ_CP097233.1	4	4_pla_p284.7_3	Salmon_SJ46	47.7	55.2
NZ_CP097235.1	4	4_pla_p70.8_1	Entero_P1	54	52.4
NZ_CP097235.1	4	4_pla_p70.8_2	Salmon_SJ46	54	50.2
NZ_CP042320.1	5-16	5-16_chr_1	Shigel_SfIV	58.6	53.9
NZ_CP042320.1	5-16	5-16_chr_2	Entero_P4	58.6	51.4
NZ_CP042320.1	5-16	5-16_chr_3	Entero_P4	58.6	53.6
NZ_CP042320.1	5-16	5-16_chr_4	Erwini_vB_EhrS_59	58.6	53.8
NZ_CP042320.1	5-16	5-16_chr_5	Klebsi_ST512_KPC3phi13.2	58.6	52.3
NZ_CP042320.1	5-16	5-16_chr_6	Salmon_SEN34	58.6	53
NZ_CP042320.1	5-16	5-16_chr_7	Microc_MaMV_DC	58.6	44.2
NZ_CP042320.1	5-16	5-16_chr_8	Klebsi_ST437_OXA245phi4.1	58.6	54.8
NZ_CP011980.1	500_1420	500_1420_chr_1	Salmon_ST64B	58.6	54.2
NZ_CP011980.1	500_1420	500_1420_chr_2	Escher_500465_1	58.6	57.4
NZ_CP011980.1	500_1420	500_1420_chr_3	Microc_MaMV_DC	58.6	44.1
NZ_CP011980.1	500_1420	500_1420_chr_4	Salmon_SEN34	58.6	54.5
NZ_CP011980.1	500_1420	500_1420_chr_5	Pectob_ZF40	58.6	52.1
NZ_CP011980.1	500_1420	500_1420_chr_6	Klebsi_ST512_KPC3phi13.2	58.6	52.4
NZ_CP011980.1	500_1420	500_1420_chr_7	Erwini_vB_EhrS_59	58.6	53.7
NZ_CP011980.1	500_1420	500_1420_chr_8	Entero_P4	58.6	56.3
NZ_CP011980.1	500_1420	500_1420_chr_9	Entero_P4	58.6	51.2
NZ_CP011980.1	500_1420	500_1420_chr_10	Bacill_vB_BtS_BMBtp14	58.6	59
NZ_CP011981.1	500_1420	500_1420_pla_p500_1420-130.552kb_1	Salmon_SJ46	55.1	57.4
NZ_CP011983.1	500_1420	500_1420_pla_p500_1420-43.380kb_1	Escher_RCS47	48	50.8
NZ_CP011982.1	500_1420	500_1420_pla_p500_1420-51.662kb_1	Escher_RCS47	55	57.1
NZ_CP099743.1	503666-2-2019	503666-2-2019_chr_1	Escher_500465_1	58.6	57.5
NZ_CP099743.1	503666-2-2019	503666-2-2019_chr_2	Acinet_YMC11/11/R3177	58.6	53.4
NZ_CP099743.1	503666-2-2019	503666-2-2019_chr_4	Klebsi_ST16_OXA48phi5.4	58.6	51.2
NZ_CP099743.1	503666-2-2019	503666-2-2019_chr_5	Escher_503458	58.6	59.2
NZ_CP099744.1	503666-2-2019	503666-2-2019_pla_p503666-2-2019a_1	Stx2_c_1717	52.4	52
NZ_CP099747.1	503666-2-2019	503666-2-2019_pla_pJEF1-OXA-181_503666-2-2019_1	Salmon_SJ46	51.6	54.5
NZ_CP050371.1	50595	50595_chr_1	Entero_P4	58.6	51.5
NZ_CP050371.1	50595	50595_chr_2	Entero_P4	58.6	53.6
NZ_CP050371.1	50595	50595_chr_3	Erwini_vB_EhrS_59	58.6	53.8
NZ_CP050371.1	50595	50595_chr_4	Klebsi_ST512_KPC3phi13.2	58.6	52.5
NZ_CP050371.1	50595	50595_chr_5	Salmon_vB_SosS_Oslo	58.6	60.6
NZ_CP050371.1	50595	50595_chr_6	Salmon_vB_SosS_Oslo	58.6	54.1
NZ_CP050371.1	50595	50595_chr_7	Salmon_SEN34	58.6	52.8
NZ_CP050371.1	50595	50595_chr_8	Escher_phiV10	58.6	55.6
NZ_CP050371.1	50595	50595_chr_9	Escher_500465_1	58.6	57.7
NZ_CP050371.1	50595	50595_chr_10	Entero_SfI	58.6	54.8
NZ_CP050373.1	50595	50595_pla_p50595_IncFII_1	Escher_RCS47	53	53.7
NZ_CP050374.1	50595	50595_pla_p50595_NDM_1_1	Escher_RCS47	55	53.2
NZ_CP050374.1	50595	50595_pla_p50595_NDM_1_3	Escher_RCS47	55	56.7
NZ_CP050374.1	50595	50595_pla_p50595_NDM_1_4	Escher_RCS47	55	55.6
NZ_CP050375.1	50595	50595_pla_p50595_OXA_181_1	Escher_RCS47	47.6	51
NZ_CP088991.1	50700	50700_chr_1	Salmon_ST64B	58.5	54.2
NZ_CP088991.1	50700	50700_chr_2	Klebsi_ST437_OXA245phi4.1	58.5	55.9
NZ_CP088991.1	50700	50700_chr_3	Escher_phiV10	58.5	54.3
NZ_CP088991.1	50700	50700_chr_4	Escher_vB_EcoM_Schickermooser	58.5	55.8
NZ_CP088991.1	50700	50700_chr_5	Salmon_SEN34	58.5	54.5
NZ_CP088991.1	50700	50700_chr_6	Cronob_ENT39118	58.5	55.1
NZ_CP088991.1	50700	50700_chr_7	Escher_HK639	58.5	54.7
NZ_CP088991.1	50700	50700_chr_9	Entero_c_1	58.5	51.1
NZ_CP088991.1	50700	50700_chr_10	Klebsi_ST512_KPC3phi13.2	58.5	52.4
NZ_CP088991.1	50700	50700_chr_11	Entero_P4	58.5	56.2
NZ_CP088991.1	50700	50700_chr_12	Entero_P4	58.5	53.4
NZ_CP088995.1	50700	50700_pla_p50700-140.6_1	Salmon_SJ46	54.9	51.6
NZ_CP088995.1	50700	50700_pla_p50700-140.6_2	Escher_RCS47	54.9	59.6
NZ_CP088995.1	50700	50700_pla_p50700-140.6_3	Salmon_SJ46	54.9	55.3
NZ_CP088996.1	50700	50700_pla_p50700-217.1_1	Entero_fiAA91_ss	51	48.8
NZ_CP088996.1	50700	50700_pla_p50700-217.1_2	Bacill_Shanette	51	50.7
NZ_CP088996.1	50700	50700_pla_p50700-217.1_3	Escher_SH2026Stx1	51	54.4
NZ_CP088994.1	50700	50700_pla_p50700-83.4_1	Salmon_SJ46	55.3	53.3
NZ_CP050376.1	51015	51015_chr_1	Escher_phiV10	58.6	55.5
NZ_CP050379.1	51015	51015_pla_p51015_CTX_M_15_2	Salmon_SJ46	53.4	53.3
NZ_CP050379.1	51015	51015_pla_p51015_CTX_M_15_3	Escher_RCS47	53.4	60
NZ_CP050379.1	51015	51015_pla_p51015_CTX_M_15_4	Escher_RCS47	53.4	53.6
NZ_CP050380.1	51015	51015_pla_p51015_NDM_1_1	Burkho_KL3	48.3	45.6
NZ_CP050380.1	51015	51015_pla_p51015_NDM_1_2	Bacill_JL	48.3	44.7
NZ_CP050380.1	51015	51015_pla_p51015_NDM_1_3	Microc_MaMV_DC	48.3	51.8
NZ_CP050380.1	51015	51015_pla_p51015_NDM_1_4	Gordon_Bachita	48.3	51.4
NZ_CP050380.1	51015	51015_pla_p51015_NDM_1_5	Salmon_SSU5	48.3	46.5
NZ_CP085740.1	51135CZ	51135CZ_chr_1	Entero_SfI	58.6	54.2
NZ_CP085740.1	51135CZ	51135CZ_chr_2	Klebsi_ST147_VIM1phi7.1	58.6	54
NZ_CP085740.1	51135CZ	51135CZ_chr_3	Escher_500465_1	58.6	52.4
NZ_CP085740.1	51135CZ	51135CZ_chr_4	Escher_vB_EcoM_Schickermooser	58.6	48.8
NZ_CP085740.1	51135CZ	51135CZ_chr_5	Entero_lambda	58.6	56.1
NZ_CP085740.1	51135CZ	51135CZ_chr_6	Sphing_PAU	58.6	53
NZ_CP085740.1	51135CZ	51135CZ_chr_7	Salmon_SEN34	58.6	54.2
NZ_CP085740.1	51135CZ	51135CZ_chr_8	Klebsi_ST512_KPC3phi13.2	58.6	53.5
NZ_CP085740.1	51135CZ	51135CZ_chr_9	Entero_P4	58.6	56.3
NZ_CP085740.1	51135CZ	51135CZ_chr_10	Entero_P4	58.6	51.4
NZ_CP085740.1	51135CZ	51135CZ_chr_11	Bacill_vB_BtS_BMBtp14	58.6	59
NZ_CP085742.1	51135CZ	51135CZ_pla_p51135CZ_IncFIB_1	Escher_RCS47	52.4	49.8
NZ_CP085742.1	51135CZ	51135CZ_pla_p51135CZ_IncFIB_2	Paenib_Yerffej	52.4	52.7
NZ_CP085742.1	51135CZ	51135CZ_pla_p51135CZ_IncFIB_3	Escher_RCS47	52.4	48.6
NZ_CP103560.1	5165	5165_chr_1	Salmon_118970_sal3	58.5	51.6
NZ_CP103560.1	5165	5165_chr_2	Pseudo_YMC11/02/R656	58.5	59.3
NZ_CP103560.1	5165	5165_chr_4	Escher_500465_1	58.5	53.2
NZ_CP103560.1	5165	5165_chr_5	Salmon_118970_sal3	58.5	51.6
NZ_CP103560.1	5165	5165_chr_6	Klebsi_4LV2017	58.5	51.6
NZ_CP103560.1	5165	5165_chr_7	Erwini_vB_EhrS_59	58.5	54.3
NZ_CP103561.1	5165	5165_pla_pMB8251_1_1	Salmon_SJ46	53.1	53.1
NZ_CP103561.1	5165	5165_pla_pMB8251_1_2	Escher_RCS47	53.1	51.4
NZ_CP083032.1	5208.51	5208.51_chr_1	Escher_500465_1	58.7	52.7
NZ_CP083032.1	5208.51	5208.51_chr_2	Salmon_118970_sal3	58.7	51.9
NZ_CP083032.1	5208.51	5208.51_chr_3	Entero_mEp237	58.7	54.3
NZ_CP083032.1	5208.51	5208.51_chr_4	Klebsi_ST16_OXA48phi5.4	58.7	51.1
NZ_CP083032.1	5208.51	5208.51_chr_5	Erwini_vB_EhrS_59	58.7	53.1
NZ_CP083033.1	5208.51	5208.51_pla_p1-5208.51_1	Escher_RCS47	53.4	56.4
NZ_CP083033.1	5208.51	5208.51_pla_p1-5208.51_2	Escher_RCS47	53.4	54.3
NZ_CP083035.1	5208.51	5208.51_pla_p3-5208.51_1	Salmon_SSU5	50.2	50.4
NZ_CP098352.1	52977_A1	52977_A1_chr_1	Salmon_ST64B	58.4	53.6
NZ_CP098352.1	52977_A1	52977_A1_chr_2	Klebsi_ST437_OXA245phi4.1	58.4	54.9
NZ_CP098352.1	52977_A1	52977_A1_chr_3	Escher_phiV10	58.4	54.5
NZ_CP098352.1	52977_A1	52977_A1_chr_4	Escher_RCS47	58.4	44.1
NZ_CP098352.1	52977_A1	52977_A1_chr_5	Salmon_SEN34	58.4	54.5
NZ_CP098352.1	52977_A1	52977_A1_chr_6	Klebsi_ST512_KPC3phi13.2	58.4	52.4
NZ_CP098352.1	52977_A1	52977_A1_chr_7	Erwini_vB_EhrS_59	58.4	53.7
NZ_CP098352.1	52977_A1	52977_A1_chr_8	Entero_P4	58.4	56.3
NZ_CP098352.1	52977_A1	52977_A1_chr_9	Entero_P4	58.4	51.5
NZ_CP098352.1	52977_A1	52977_A1_chr_10	Escher_RCS47	58.4	50.6
NZ_CP098353.1	52977_A1	52977_A1_pla_p52977-161.7_1	Escher_RCS47	55.2	53
NZ_CP098353.1	52977_A1	52977_A1_pla_p52977-161.7_2	Salmon_SJ46	55.2	57.7
NZ_CP098353.1	52977_A1	52977_A1_pla_p52977-161.7_3	Sodali_phiSG1	55.2	55
NZ_CP098353.1	52977_A1	52977_A1_pla_p52977-161.7_4	Escher_RCS47	55.2	55.2
NZ_CP098354.1	52977_A1	52977_A1_pla_p52977-166.3_1	Entero_BP_4795	51.1	51.5
NZ_CP098354.1	52977_A1	52977_A1_pla_p52977-166.3_2	Entero_933W	51.1	55.8
NZ_CP098350.1	52980_A4	52980_A4_chr_1	Entero_SfI	58.4	53.6
NZ_CP098350.1	52980_A4	52980_A4_chr_2	Klebsi_ST437_OXA245phi4.1	58.4	54.7
NZ_CP098350.1	52980_A4	52980_A4_chr_3	Escher_phiV10	58.4	54.5
NZ_CP098350.1	52980_A4	52980_A4_chr_4	Escher_RCS47	58.4	44.1
NZ_CP098350.1	52980_A4	52980_A4_chr_5	Salmon_SEN34	58.4	54.5
NZ_CP098350.1	52980_A4	52980_A4_chr_6	Klebsi_ST512_KPC3phi13.2	58.4	52.4
NZ_CP098350.1	52980_A4	52980_A4_chr_7	Erwini_vB_EhrS_59	58.4	53.7
NZ_CP098350.1	52980_A4	52980_A4_chr_8	Entero_P4	58.4	56.3
NZ_CP098350.1	52980_A4	52980_A4_chr_9	Entero_P4	58.4	51.2
NZ_CP098350.1	52980_A4	52980_A4_chr_10	Escher_RCS47	58.4	50.6
NZ_CP098351.1	52980_A4	52980_A4_pla_p52980-161.7_1	Escher_RCS47	55.2	53
NZ_CP098351.1	52980_A4	52980_A4_pla_p52980-161.7_2	Salmon_SJ46	55.2	57.7
NZ_CP098351.1	52980_A4	52980_A4_pla_p52980-161.7_3	Sodali_phiSG1	55.2	55
NZ_CP098351.1	52980_A4	52980_A4_pla_p52980-161.7_4	Cronob_ENT39118	55.2	55.2
NZ_CP098347.1	52984_A8	52984_A8_chr_1	Entero_SfI	58.4	53.6
NZ_CP098347.1	52984_A8	52984_A8_chr_2	Klebsi_ST437_OXA245phi4.1	58.4	54.9
NZ_CP098347.1	52984_A8	52984_A8_chr_3	Escher_phiV10	58.4	54.5
NZ_CP098347.1	52984_A8	52984_A8_chr_4	Escher_RCS47	58.4	44.1
NZ_CP098347.1	52984_A8	52984_A8_chr_5	Salmon_SEN34	58.4	54.5
NZ_CP098347.1	52984_A8	52984_A8_chr_6	Klebsi_ST512_KPC3phi13.2	58.4	52.4
NZ_CP098347.1	52984_A8	52984_A8_chr_7	Erwini_vB_EhrS_59	58.4	53.7
NZ_CP098347.1	52984_A8	52984_A8_chr_8	Entero_P4	58.4	56.3
NZ_CP098347.1	52984_A8	52984_A8_chr_9	Entero_P4	58.4	51.2
NZ_CP098347.1	52984_A8	52984_A8_chr_10	Escher_RCS47	58.4	50.6
NZ_CP098348.1	52984_A8	52984_A8_pla_p52984-161.7_1	Escher_RCS47	55.2	53
NZ_CP098348.1	52984_A8	52984_A8_pla_p52984-161.7_2	Salmon_SJ46	55.2	57.7
NZ_CP098348.1	52984_A8	52984_A8_pla_p52984-161.7_3	Sodali_phiSG1	55.2	55
NZ_CP098348.1	52984_A8	52984_A8_pla_p52984-161.7_4	Sodali_phiSG1	55.2	55.2
NZ_CP098349.1	52984_A8	52984_A8_pla_p52984-166.3_1	Stx2_II	51.1	51.5
NZ_CP098349.1	52984_A8	52984_A8_pla_p52984-166.3_2	Entero_933W	51.1	55.8
NZ_CP098343.1	53009_G1	53009_G1_chr_1	Entero_SfI	58.4	54.2
NZ_CP098343.1	53009_G1	53009_G1_chr_2	Escher_500465_1	58.4	57.4
NZ_CP098343.1	53009_G1	53009_G1_chr_3	Escher_RCS47	58.4	51.6
NZ_CP098343.1	53009_G1	53009_G1_chr_5	Salmon_SEN34	58.4	53
NZ_CP098343.1	53009_G1	53009_G1_chr_6	Escher_RCS47	58.4	60.8
NZ_CP098343.1	53009_G1	53009_G1_chr_7	Escher_HK639	58.4	55
NZ_CP098343.1	53009_G1	53009_G1_chr_8	Pectob_ZF40	58.4	52.7
NZ_CP098343.1	53009_G1	53009_G1_chr_9	Klebsi_ST512_KPC3phi13.2	58.4	52.4
NZ_CP098343.1	53009_G1	53009_G1_chr_10	Erwini_vB_EhrS_59	58.4	53.5
NZ_CP098343.1	53009_G1	53009_G1_chr_11	Entero_P4	58.4	54.3
NZ_CP098343.1	53009_G1	53009_G1_chr_12	Entero_P4	58.4	57.6
NZ_CP098345.1	53009_G1	53009_G1_pla_p53009-126.3_1	Escher_RCS47	53.7	53
NZ_CP098345.1	53009_G1	53009_G1_pla_p53009-126.3_4	Salmon_SJ46	53.7	53.2
NZ_CP098345.1	53009_G1	53009_G1_pla_p53009-126.3_5	Entero_933W	53.7	52
NZ_CP098346.1	53009_G1	53009_G1_pla_p53009-167.9_2	Salmon_SJ46	53.7	58.5
NZ_CP098346.1	53009_G1	53009_G1_pla_p53009-167.9_3	Escher_RCS47	53.7	55.5
NZ_CP098340.1	53015_G7	53015_G7_chr_1	Shigel_SfIV	58.4	54.2
NZ_CP098340.1	53015_G7	53015_G7_chr_2	Escher_500465_1	58.4	57.4
NZ_CP098340.1	53015_G7	53015_G7_chr_3	Escher_RCS47	58.4	51.9
NZ_CP098340.1	53015_G7	53015_G7_chr_4	Salmon_SEN34	58.4	53
NZ_CP098340.1	53015_G7	53015_G7_chr_5	Escher_RCS47	58.4	60.8
NZ_CP098340.1	53015_G7	53015_G7_chr_6	Escher_HK639	58.4	55
NZ_CP098340.1	53015_G7	53015_G7_chr_7	Pectob_ZF40	58.4	52.7
NZ_CP098340.1	53015_G7	53015_G7_chr_8	Klebsi_ST512_KPC3phi13.2	58.4	52.4
NZ_CP098340.1	53015_G7	53015_G7_chr_9	Erwini_vB_EhrS_59	58.4	53.6
NZ_CP098340.1	53015_G7	53015_G7_chr_10	Entero_P4	58.4	54.3
NZ_CP098340.1	53015_G7	53015_G7_chr_11	Entero_P4	58.4	57.6
NZ_CP098342.1	53015_G7	53015_G7_pla_p53015-126.5_1	Staphy_SPbeta_like	53.8	53
NZ_CP098342.1	53015_G7	53015_G7_pla_p53015-126.5_4	Salmon_SJ46	53.8	53.2
NZ_CP098342.1	53015_G7	53015_G7_pla_p53015-126.5_5	Stx2_c_Stx2a_WGPS9	53.8	52
NZ_CP098338.1	53022_J1	53022_J1_chr_1	Entero_SfI	58.5	54.2
NZ_CP098338.1	53022_J1	53022_J1_chr_2	Escher_RCS47	58.5	48.7
NZ_CP098338.1	53022_J1	53022_J1_chr_3	Klebsi_ST437_OXA245phi4.1	58.5	54.7
NZ_CP098338.1	53022_J1	53022_J1_chr_4	Escher_phiV10	58.5	54.5
NZ_CP098338.1	53022_J1	53022_J1_chr_5	Microc_MaMV_DC	58.5	44.1
NZ_CP098338.1	53022_J1	53022_J1_chr_6	Salmon_SEN34	58.5	54.5
NZ_CP098338.1	53022_J1	53022_J1_chr_7	Klebsi_ST512_KPC3phi13.2	58.5	52.4
NZ_CP098338.1	53022_J1	53022_J1_chr_8	Erwini_vB_EhrS_59	58.5	53.7
NZ_CP098338.1	53022_J1	53022_J1_chr_9	Entero_P4	58.5	56.2
NZ_CP098338.1	53022_J1	53022_J1_chr_10	Entero_P4	58.5	57.6
NZ_CP098339.1	53022_J1	53022_J1_pla_p53022-165.2_1	Escher_RCS47	54.9	53
NZ_CP098339.1	53022_J1	53022_J1_pla_p53022-165.2_2	Salmon_SJ46	54.9	57.7
NZ_CP098339.1	53022_J1	53022_J1_pla_p53022-165.2_3	Sodali_phiSG1	54.9	55
NZ_CP098339.1	53022_J1	53022_J1_pla_p53022-165.2_4	Escher_RCS47	54.9	55.2
NZ_CP098335.1	53023_J2	53023_J2_chr_1	Salmon_ST64B	58.5	54.2
NZ_CP098335.1	53023_J2	53023_J2_chr_2	Escher_RCS47	58.5	48.7
NZ_CP098335.1	53023_J2	53023_J2_chr_3	Klebsi_ST437_OXA245phi4.1	58.5	54.9
NZ_CP098335.1	53023_J2	53023_J2_chr_4	Escher_phiV10	58.5	54.5
NZ_CP098335.1	53023_J2	53023_J2_chr_5	Escher_vB_EcoM_Schickermooser	58.5	53.4
NZ_CP098335.1	53023_J2	53023_J2_chr_6	Microc_Ma_LMM01	58.5	44.1
NZ_CP098335.1	53023_J2	53023_J2_chr_7	Salmon_SEN34	58.5	54.5
NZ_CP098335.1	53023_J2	53023_J2_chr_8	Klebsi_ST512_KPC3phi13.2	58.5	52.4
NZ_CP098335.1	53023_J2	53023_J2_chr_9	Erwini_vB_EhrS_59	58.5	53.7
NZ_CP098335.1	53023_J2	53023_J2_chr_10	Entero_P4	58.5	56.2
NZ_CP098335.1	53023_J2	53023_J2_chr_11	Entero_P4	58.5	57.6
NZ_CP098337.1	53023_J2	53023_J2_pla_p53023-165.2_1	Escher_RCS47	54.9	53
NZ_CP098337.1	53023_J2	53023_J2_pla_p53023-165.2_2	Salmon_SJ46	54.9	57.7
NZ_CP098337.1	53023_J2	53023_J2_pla_p53023-165.2_3	Sodali_phiSG1	54.9	55
NZ_CP098337.1	53023_J2	53023_J2_pla_p53023-165.2_4	Escher_RCS47	54.9	55.2
NZ_CP088988.1	53322	53322_chr_1	Mycoba_Enkosi	58.4	54.4
NZ_CP088988.1	53322	53322_chr_2	Escher_500465_1	58.4	46.8
NZ_CP088988.1	53322	53322_chr_3	Salmon_SPN1S	58.4	54.5
NZ_CP088988.1	53322	53322_chr_4	Prochl_P_TIM68	58.4	59
NZ_CP088989.1	53322	53322_pla_p53322-121.6_1	Escher_RCS47	53.3	54.5
NZ_CP088990.1	53322	53322_pla_p53322-228.1_1	Entero_HK225	51.3	50.4
NZ_CP088990.1	53322	53322_pla_p53322-228.1_2	Escher_SH2026Stx1	51.3	54.3
NZ_CP088985.1	53334	53334_chr_1	Entero_P4	58.9	56.4
NZ_CP088985.1	53334	53334_chr_2	Entero_Tyrion	58.9	48
NZ_CP088987.1	53334	53334_pla_p53334-210.3_1	Caulob_CcrSC	50.9	50.5
NZ_CP088987.1	53334	53334_pla_p53334-210.3_2	Escher_SH2026Stx1	50.9	54.3
NZ_CP088986.1	53334	53334_pla_p53334-88.9_1	Escher_RCS47	54.2	55.1
NZ_CP088986.1	53334	53334_pla_p53334-88.9_2	Stx2_c_1717	54.2	54.5
NZ_CP088982.1	53357	53357_chr_1	Escher_500465_1	58.5	57.4
NZ_CP088982.1	53357	53357_chr_2	Salmon_SPN1S	58.5	54.9
NZ_CP088982.1	53357	53357_chr_3	Salmon_118970_sal3	58.5	51.3
NZ_CP088982.1	53357	53357_chr_4	Pseudo_MP1412	58.5	58
NZ_CP088982.1	53357	53357_chr_5	Serrat_vB_SmaA_3M	58.5	48.4
NZ_CP088982.1	53357	53357_chr_6	Klebsi_phiKO2	58.5	55.3
NZ_CP088984.1	53357	53357_pla_p53357-227.9_1	Escher_phAPEC8	51.2	50.7
NZ_CP088984.1	53357	53357_pla_p53357-227.9_2	Escher_SH2026Stx1	51.2	54.4
NZ_CP088983.1	53357	53357_pla_p53357-97.9_1	Cronob_ENT39118	50.5	57.4
NZ_CP089021.1	53370	53370_chr_1	Escher_500465_1	58.5	57.4
NZ_CP089021.1	53370	53370_chr_2	Salmon_SPN1S	58.5	54.9
NZ_CP089021.1	53370	53370_chr_3	Salmon_118970_sal3	58.5	51.1
NZ_CP089021.1	53370	53370_chr_4	Bacill_SP_15	58.5	58
NZ_CP089021.1	53370	53370_chr_5	Ralsto_RSY1	58.5	48.4
NZ_CP089021.1	53370	53370_chr_6	Klebsi_phiKO2	58.5	55.3
NZ_CP089023.1	53370	53370_pla_p53370-227.9_1	Escher_phAPEC8	51.2	50.7
NZ_CP089023.1	53370	53370_pla_p53370-227.9_2	Escher_SH2026Stx1	51.2	54.4
NZ_CP089022.1	53370	53370_pla_p53370-97.9_1	Escher_503458	50.5	57.4
NZ_CP089014.1	53374	53374_chr_1	Salmon_ST64B	58.4	54.2
NZ_CP089014.1	53374	53374_chr_2	Klebsi_ST437_OXA245phi4.1	58.4	54.7
NZ_CP089014.1	53374	53374_chr_3	Escher_phiV10	58.4	53.9
NZ_CP089014.1	53374	53374_chr_4	Salmon_SEN34	58.4	54.2
NZ_CP089014.1	53374	53374_chr_5	Pectob_ZF40	58.4	52.7
NZ_CP089014.1	53374	53374_chr_6	Klebsi_ST512_KPC3phi13.2	58.4	53.4
NZ_CP089014.1	53374	53374_chr_7	Entero_P4	58.4	56.3
NZ_CP089014.1	53374	53374_chr_8	Entero_P4	58.4	51.2
NZ_CP089014.1	53374	53374_chr_9	Escher_503458	58.4	59
NZ_CP089017.1	53374	53374_pla_p53374-100.0_1	Escher_RCS47	54.3	54.2
NZ_CP089017.1	53374	53374_pla_p53374-100.0_2	Escher_503458	54.3	57.7
NZ_CP089018.1	53374	53374_pla_p53374-110.4_1	Salmon_SSU5	50.6	50.2
NZ_CP089019.1	53374	53374_pla_p53374-177.1_1	Salmon_SJ46	53.1	54.1
NZ_CP089020.1	53374	53374_pla_p53374-204.7_1	Escher_520873	51.1	51.6
[truncated: 13,947 more rows]
