# Supplementary material for: Characterization and Diversity of Klebsiella pneumoniae Prophages
Source: Int J Mol Sci. 2023 May 23;24(11):9116. doi: 10.3390/ijms24119116 (PMC10252525; doi:10.3390/ijms24119116)
Supplement: Supplementary file 1 [file ijms-24-09116-s001.zip › Supplementary Table S4.tsv]

Strain_RefSeq_Accn	Strain_Name	Prophage_Name	Plasmid_Length (Kb)	Prophage_Length (Kb)	Prophage_Completeness	Most_Common_Phage
NZ_CP084854.1	SB2390	SB2390_pla_pKp_SB62390_2_1	110.9	110.8	intact	Salmon_SSU5
NZ_CP101549.1	KP82	KP82_pla_p82_3_1	111.5	111.4	intact	Salmon_SSU5
NZ_CP086286.1	Kp1	Kp1yi_pla_pKp1_1	111.7	111.6	intact	Salmon_SSU5
NZ_CP030268.1	SC-7	SC-7_pla_pSC7-IncFIB-110K_1	111	110.9	intact	Salmon_SSU5
NZ_CP064249.1	JX-CR-hvKP-2	JX-CR-hvKP-2_pla_pJX2-3_1	56.4	56.3	intact	Klebsi_phiKO2
NZ_CP044030.1	RJY9645	RJY9645_pla_pY9645-105_1	105.7	105.6	intact	Salmon_SSU5
NZ_CP070439.1	B5617	B5617_pla_p4B5617_1	111.2	111.1	intact	Salmon_SSU5
NZ_CP016924.1	23	23yi_pla_pIncFIB_DHQP1400954_1	111.5	111.4	intact	Salmon_SSU5
NZ_CP026165.1	F81	F81_pla_pF81_1_1	111.3	111.1	intact	Salmon_SSU5
NZ_CP021942.1	AR_0145	AR_0145_pla_tig00000218j2847_linear_1	76.7	76.6	intact	Klebsi_phiKO2
NZ_CP014756.1	AATZP	AATZP_pla_pKPN-04f_1	121	120.8	intact	Salmon_SSU5
NZ_CP030322.1	23	23er_pla_p23-2_1	108.4	108.2	intact	Salmon_SSU5
NZ_CP064210.1	JX-CR-hvKP-11	JX-CR-hvKP-11_pla_pJX11-2_1	111.4	111.2	intact	Salmon_SSU5
NZ_CP012570.1	UCLAOXA232KP	UCLAOXA232KP2_pla_pUCLAOXA232-4.X_1	111.2	111	intact	Salmon_SSU5
NZ_CP032224.1	AR_0046	AR_0046_pla_unnamed2_1	73.1	72.9	intact	Klebsi_phiKO2
NZ_CP080358.1	K191663	K191663_pla_pFIB-191663_1	111.2	111	intact	Salmon_SSU5
NZ_CP073786.1	KP_NORM_BLD_2014_96855	KP_NORM_BLD_2014_96855_pla_unnamed_3_1	110.5	110.3	intact	Salmon_SSU5
NZ_CP030306.1	205880	205880_pla_p205880-4_1	108	107.8	intact	Salmon_SSU5
NZ_CP012565.1	UCLAOXA232KP	UCLAOXA232KP1_pla_pUCLAOXA232-4_1	112.1	111.8	intact	Salmon_SSU5
NZ_CP061959.1	IR5726	IR5726_pla_unnamed2_1	110.4	110.1	intact	Klebsi_phiKO2
NZ_CP009878.1	KPNIH31	KPNIH31_pla_pKPN-852_1	51.6	51.5	intact	Klebsi_phiKO2
NC_016838.1	HS11286	HS11286_pla_pKPHS1_1	122.8	122.5	intact	Salmon_SSU5
NZ_CP024841.1	CRKP-1215	CRKP-1215_pla_pCRKP-1215_3_1	72.7	72.5	intact	Klebsi_phiKO2
NZ_CP016161.1	TH1	TH1_pla_unnamed2_1	109.3	109	intact	Salmon_SSU5
NZ_CP056375.1	RHBSTW-00636	RHBSTW-00636_pla_pRHBSTW-00636_4_1	107.7	107.3	intact	Salmon_SSU5
NZ_CP071082.1	3347684I	3347684I_pla_p3347684I_2_1	111	110.6	intact	Salmon_SSU5
NZ_CP061056.1	HKP0067	HKP0067_pla_pHKP0067.3_1	113	112.6	intact	Salmon_SSU5
NZ_CP061065.1	HKP0018	HKP0018_pla_pHKP0018.3_1	113	112.6	intact	Salmon_SSU5
NZ_CP028992.1	AR_0142	AR_0142_pla_unnamed2_1	69	68.7	intact	Klebsi_phiKO2
NZ_CP012427.1	KP5	KP5_pla_pSg1-1_1	126.5	126	intact	Salmon_SSU5
NZ_OX337254.1	65326252-51f1-11ec-980a-fa163eea3084	65326252_pla_3_1	113.1	112.7	intact	Salmon_SSU5
NZ_CP030133.1	160111	160111_pla_pIncFII_L111_1	39.2	39.1	intact	Escher_RCS47
NZ_CP020063.1	AR_0117	AR_0117_pla_unitig_2_1	109	108.6	intact	Salmon_SSU5
NZ_CP050338.1	ZRKP04	ZRKP04_pla_unnamed2_1	110.5	110.1	intact	Salmon_SSU5
NZ_CP064213.1	JX-CR-hvKP-9	JX-CR-hvKP-9_pla_pJX9-2_1	116.6	116.1	intact	Salmon_SSU5
NZ_LR890206.1	INF277	INF277_pla_3_1	95.8	95.4	intact	Salmon_SJ46
NZ_LR890724.1	KSB1_1H	KSB1_1H_pla_3_1	95.8	95.4	intact	Salmon_SJ46
NZ_CP017988.1	825795-1	825795-1_pla_unnamed3_1	73.2	72.9	intact	Klebsi_phiKO2
NZ_AP024176.1	KSB1_9A	KSB1_9A_pla_pKSB1_9A_3_1	110.5	110	intact	Salmon_SSU5
NZ_CP047636.1	K2606	K2606_pla_unnamed3_1	109	108.5	intact	Salmon_SSU5
NZ_CP032187.1	AR_0075	AR_0075_pla_unnamed2_1	110.9	110.4	intact	Salmon_SSU5
NZ_CP065450.1	Ocean Ranger	Ocean_Ranger_pla_pOceanRanger_01_1	109.9	109.4	intact	Salmon_SSU5
NZ_CP100512.1	LH50-a	LH50-a_pla_pLH50-a-A_1	54.3	54	intact	Klebsi_phiKO2
NZ_CP050365.1	47733	47733_pla_p47733_IncFIB_1	115.4	114.7	intact	Salmon_SSU5
NZ_CP012429.1	KP5	KP5_pla_pSg1-3_1	46.9	46.6	intact	Klebsi_phiKO2
NZ_CP074117.1	kpn-hnqyy	kpn-hnqyy_pla_unnamed1_1	123.6	122.8	intact	Klebsi_phiKO2
NZ_CP024837.1	CRKP-2297	CRKP-2297_pla_pCRKP-2297_3_1	69.6	69.2	intact	Klebsi_phiKO2
NZ_CP065827.1	KpPF25	KpPF25_pla_p2_1	110.8	110.1	intact	Salmon_SSU5
NZ_CP022128.1	DHQP1605752_NV	DHQP1605752_NV_pla_p1605752FIB_2_1	111.7	111	intact	Salmon_SSU5
NZ_CP031806.1	MSB1_8A-sc-2280397	MSB1_8A-sc-2280397_pla_unnamed6_1	53.9	53.6	intact	Klebsi_phiKO2
NZ_CP097676.1	IR12024_1	IR12024_1_pla_unnamed1_1	103.4	102.7	intact	Klebsi_phiKO2
NZ_CP077807.1	FF979	FF979_pla_pFF979_1_1	108.5	107.8	intact	Salmon_SSU5
NZ_CP069855.1	FDAARGOS_1324	FDAARGOS_1324_pla_unnamed2_1	104.8	104.1	intact	Salmon_SSU5
NZ_AP024758.1	TUM12128	TUM12128_pla_pMTY12128_1	41.8	41.5	intact	Salmon_SEN34
NZ_CP068974.1	fekpn2511	fekpn2511_pla_pfekpn2511-2_1	108.3	107.6	intact	Salmon_SSU5
NZ_CP098158.1	Z0117KP0017	Z0117KP0017_pla_pZ0117KP0017-4_1	110.9	110.1	intact	Salmon_SSU5
NZ_CP072464.1	KP1517	KP1517_pla_unnamed1_1	111.9	111.1	intact	Salmon_SSU5
NZ_CP057317.1	RHB30-C05	RHB30-C05_pla_pRHB30-C05_5_1	53.8	53.4	intact	Klebsi_phiKO2
NZ_CP091592.1	Nord5-1_R48	Nord5-1_R48_pla_pR48_3_1	109.6	108.8	intact	Salmon_SSU5
NZ_CP018688.1	Kp_Goe_149473	Kp_Goe_149473_pla_pKp_Goe_473-5_1	75.8	75.3	intact	Klebsi_phiKO2
NZ_CP032225.1	AR_0046	AR_0046_pla_unnamed3_1	108.9	108.1	intact	Salmon_SSU5
NZ_CP032196.1	AR_0097	AR_0097_pla_unnamed2_1	109.4	108.6	intact	Salmon_SSU5
NZ_CP018715.1	Kp_Goe_152021	Kp_Goe_152021_pla_pKp_Goe_021-5_1	80.9	80.3	intact	Klebsi_phiKO2
NZ_CP032191.1	AR_0075	AR_0075_pla_unnamed6_1	78.2	77.6	intact	Klebsi_phiKO2
NZ_CP063873.1	S141	S141_pla_pS141.2_1	112.2	111.3	intact	Salmon_SSU5
NZ_CP079763.1	JP20	JP20_pla_unnamed1_1	107.7	106.8	intact	Salmon_SSU5
NZ_LR890729.1	INF102-sc-2279897	INF102-sc-2279897_pla_4_1	103.8	103	intact	Salmon_SSU5
NZ_CP097705.1	IR12197_1	IR12197_1_pla_unnamed2_1	111.1	110.2	intact	Salmon_SSU5
NZ_CP027045.1	1_GR_13	1_GR_13_pla_IncFIB_1	108.9	108	intact	Salmon_SSU5
NZ_CP018721.1	KP_Goe_828304	KP_Goe_828304_pla_pKp_Goe_304-5_1	73.6	73	intact	Klebsi_phiKO2
NZ_CP097706.1	IR12197_1	IR12197_1_pla_unnamed3_1	97	96.2	intact	Klebsi_phiKO2
NZ_CP024460.1	QS17-0161	QS17-0161_pla_pMRSN480738_112.7_1	112.7	111.8	intact	Salmon_SSU5
NZ_CP079122.1	WRC03_AI1235PC	WRC03_AI1235PC_pla_pAI1235P_P2_1	111.6	110.6	intact	Salmon_SSU5
NZ_CP036330.1	BA28434	BA28434_pla_punnamed_1_VBA28434_1	47.4	47	intact	Klebsi_phiKO2
NZ_CP057316.1	RHB30-C05	RHB30-C05_pla_pRHB30-C05_4_1	110.7	109.7	intact	Salmon_SSU5
NZ_CP109773.1	YZ-58	YZ-58_pla_pYZ-58-110k_1	110.4	109.4	intact	Salmon_SSU5
NZ_CP070529.1	KP47693	KP47693_pla_p47693_2_1	81.5	80.7	intact	Klebsi_phiKO2
NZ_CP040026.1	KPC160132	KPC160132_pla_pIncFI-L132_1	109.9	108.9	intact	Salmon_SSU5
NZ_CP021945.1	AR_0152	AR_0152_pla_tig00000194_1	112.9	111.8	intact	Salmon_SSU5
NZ_CP040597.1	KpvST15_NDM	KpvST15_NDM_pla_unnamed3_1	111.6	110.5	intact	Salmon_SSU5
NZ_CP021949.1	AR_0152	AR_0152_pla_tig00000216_u_1	81.7	80.9	intact	Klebsi_phiKO2
NZ_CP036373.1	WCHKP020037	WCHKP020037_pla_p1_020037_1	108.3	107.2	intact	Salmon_SSU5
NZ_CP026138.1	F77	F77_pla_pF77_2_1	113.2	112.1	intact	Salmon_SSU5
NZ_CP110944.1	LC-1873/18	LC-187318_pla_pvB_Kpn_1873-KPC3_1	119.6	118.4	intact	Salmon_SSU5
NZ_CP070600.1	KPA9853	KPA9853_pla_pA9853_2_1	75.6	74.8	intact	Klebsi_phiKO2
NZ_CP070567.1	KP51248	KP51248_pla_p51248_1_1	77.1	76.3	intact	Klebsi_phiKO2
NZ_CP055187.1	STEFF_14	STEFF_14_pla_unnamed1_1	111.1	110	intact	Salmon_SSU5
NZ_CP084855.1	SB2390	SB2390_pla_pKp_SB62390_3_1	43.6	43.1	intact	Erwini_vB_EhrS_59
NZ_LR890473.1	INF168-sc-2280023	INF168-sc-2280023_pla_3_1	40.2	39.8	intact	Entero_HK140
NZ_LR890708.1	INF305-sc-2280094	INF305-sc-2280094_pla_7_1	53.8	53.2	intact	Klebsi_phiKO2
NZ_CP045677.1	WSD411	WSD411_pla_pWSD411_4_1	128.5	127.2	intact	Salmon_SSU5
NZ_CP079728.1	KP3295	KP3295_pla_pKP3295-3_1	128.5	127.2	intact	Salmon_SSU5
NZ_CP097387.1	KPTCM	KPTCM_pla_pKPTCM-2_1	128.5	127.2	intact	Salmon_SSU5
NZ_CP033624.1	4743	4743_pla_unnamed6_1	54.8	54.2	intact	Klebsi_phiKO2
NZ_CP077813.1	FF1083	FF1083_pla_pFF1083_1_1	54.3	53.7	intact	Klebsi_phiKO2
NZ_CP077781.1	CDI231	CDI231_pla_pCDI231-42.6_1	42.6	42.1	intact	Salmon_SEN34
NZ_CP061391.1	NU-CRE195	NU-CRE195_pla_pCRE-195-2_1	112	110.8	intact	Salmon_SSU5
NZ_CP031803.1	MSB1_8A-sc-2280397	MSB1_8A-sc-2280397_pla_unnamed3_1	111.1	109.9	intact	Salmon_SSU5
NZ_LR890257.1	INF310-sc-2280104	INF310-sc-2280104_pla_4_1	111.1	109.9	intact	Salmon_SSU5
NZ_LR890429.1	INF298	INF298_pla_4_1	111.1	109.9	intact	Salmon_SSU5
NZ_LR890503.1	KSB1_5H-sc-2280283	KSB1_5H-sc-2280283_pla_4_1	111.1	109.9	intact	Salmon_SSU5
NZ_LR890518.1	INF281-sc-2280206	INF281-sc-2280206_pla_4_1	111.1	109.9	intact	Salmon_SSU5
NZ_LR890635.1	INF299-sc-2280084	INF299-sc-2280084_pla_4_1	111.1	109.9	intact	Salmon_SSU5
NZ_LR890705.1	INF305-sc-2280094	INF305-sc-2280094_pla_4_1	111.1	109.9	intact	Salmon_SSU5
NZ_CP018709.1	Kp_Goe_827026	Kp_Goe_827026_pla_pKp_Goe_026-5_1	73	72.2	intact	Klebsi_phiKO2
NZ_AP024574.1	KpWEA3	KpWEA3_pla_P3_1	110.9	109.6	intact	Salmon_SSU5
NZ_OV408204.1	CNR146C9	CNR146C9_pla_p2_1	52.6	52	intact	Klebsi_phiKO2
NZ_LR890544.1	INF319-sc-2280116	INF319-sc-2280116_pla_3_1	112	110.7	intact	Salmon_SSU5
NZ_CP106764.1	KP0937	KP0937_pla_pKP0937-4_1	41.8	41.3	intact	Salmon_SEN34
NZ_CP103317.1	hvKP12	hvKP12_pla_phvKP12-B_1	115.5	114.2	intact	Salmon_SSU5
NZ_CP084845.1	SB611	SB611_pla_pKp_SB611_2_1	111.5	110.2	intact	Salmon_SSU5
NZ_CP084833.1	SB612	SB612_pla_pKp_SB612_3_1	111.5	110.2	intact	Salmon_SSU5
NZ_CP034055.1	KP_NORM_BLD_2015_112126	KP_NORM_BLD_2015_112126_pla_unnamed2_1	113.1	111.8	intact	Salmon_SSU5
NZ_CP055511.1	RHBSTW-00472	RHBSTW-00472_pla_pRHBSTW-00472_3_1	115.1	113.7	intact	Salmon_SSU5
NZ_CP034047.1	KP_NORM_BLD_2014_104014	KP_NORM_BLD_2014_104014_pla_unnamed2_1	113.1	111.8	intact	Salmon_SSU5
NZ_LR890555.1	INF182-sc-2280049	INF182-sc-2280049_pla_2_1	112.1	110.8	intact	Salmon_SSU5
NZ_CP056309.1	RHBSTW-00832	RHBSTW-00832_pla_pRHBSTW-00832_3_1	113.9	112.5	intact	Salmon_SSU5
NZ_CP026150.1	F138	F138_pla_pF138_1_1	112.5	111.1	intact	Salmon_SSU5
NZ_CP021940.1	AR_0145	AR_0145_pla_tig00000209_1	112.9	111.5	intact	Salmon_SSU5
NZ_CP084394.1	MRSN752019	MRSN752019_pla_unnamed1_1	112.9	111.5	intact	Salmon_SSU5
NZ_CP074089.1	MRSN752165	MRSN752165_pla_unnamed1_1	112.9	111.5	intact	Salmon_SSU5
NZ_CP082991.1	7008.2	7008.20_pla_p3-7008.20_1	112.9	111.5	intact	Salmon_SSU5
NZ_CP070892.1	KP-135LU	KP-135LU_pla_pvB_Kpn_135LU_ST147_1	112.9	111.5	intact	Salmon_SSU5
NZ_CP071029.1	KP-1Pi	KP-1Pi_pla_pvB_Kpn_1PI_ST147_1	112.9	111.5	intact	Salmon_SSU5
NZ_CP080364.1	K191773	K191773_pla_pFIB-191773_1	110.6	109.3	intact	Salmon_SSU5
NZ_CP100480.1	LH99-d	LH99-d_pla_pLH99-d-B_1	109.9	108.6	intact	Salmon_SSU5
NZ_CP100523.1	LH13-d	LH13-d_pla_pLH13-d-C_1	109.9	108.6	intact	Salmon_SSU5
NZ_CP084826.1	SB617	SB617_pla_pKp_SB617_1_1	109	107.7	intact	Salmon_SSU5
NZ_CP028544.1	SCKP020143	SCKP020143_pla_p2_020143_1	110.6	109.2	intact	Salmon_SSU5
NZ_OW970496.1	147	1479_pla_P4_1	55.2	54.5	intact	Klebsi_phiKO2
NZ_CP102873.1	KA2	KA2_pla_pKA2-4_1	111.3	109.9	intact	Salmon_SSU5
NZ_CP063853.1	M1023-4Ar	M1023-4Ar_pla_pM1023-4Ar.2_1	110.3	108.9	intact	Salmon_SSU5
NZ_CP063882.1	S90-2	S90-2_pla_pS90-2.1_1	110.4	109	intact	Salmon_SSU5
NZ_AP023149.1	SMKP03	SMKP03_pla_pSMKP03L_1	111.3	109.9	intact	Salmon_SSU5
NZ_CP031791.1	KSB1_1I-sc-2280289	KSB1_1I-sc-2280289_pla_unnamed2_1	109.7	108.3	intact	Salmon_SSU5
NZ_CP046941.1	BD_DM_697	BD_DM_697_pla_punnamed2_1	150.2	148.3	intact	Salmon_SSU5
NZ_CP106916.1	BSIKPN-9	BSIKPN-9_pla_unnamed4_1	89.3	88.1	intact	Klebsi_phiKO2
NZ_CP046383.1	BD_DM_782	BD_DM_782_pla_punnamed2_1	150.2	148.3	intact	Salmon_SSU5
NZ_CP050366.1	47733	47733_pla_p47733L_1	55.1	54.4	intact	Klebsi_phiKO2
NZ_CP046951.1	BD_DM_914	BD_DM_914_pla_punnamed2_1	150.3	148.3	intact	Salmon_SSU5
NZ_CP059316.1	Kp46564	Kp46564_pla_pKp46564-1_1	109.6	108.1	intact	Salmon_SSU5
NZ_LR890432.1	INF298	INF298_pla_7_1	53.9	53.2	intact	Klebsi_phiKO2
NZ_CP036444.1	ABFPV	ABFPV_pla_tig00001255_pilon_1	53.6	52.9	intact	Klebsi_phiKO2
NZ_CP021957.1	AR_0107	AR_0107_pla_unitig_3j2_linear_pilon_1	72.1	71.1	intact	Klebsi_phiKO2
NZ_CP064255.1	JX-CR-hvKP-1	JX-CR-hvKP-1_pla_pJX1-3_1	55.2	54.4	intact	Klebsi_phiKO2
NZ_CP018703.1	Kp_Goe_827024	Kp_Goe_827024_pla_pKp_Goe_024-5_1	66.1	65.2	intact	Klebsi_phiKO2
NZ_CP084243.1	T877	T877_pla_pKPT877-IncFIB_1	113.2	111.5	intact	Salmon_SSU5
NZ_CP026134.1	F5	F5_pla_pF5_2_1	112.5	110.8	intact	Salmon_SSU5
NZ_CP076011.1	WGR351	WGR351_pla_p3WGR351_1	54.6	53.8	intact	Klebsi_phiKO2
NZ_CP027615.1	AR_0096	AR_0096_pla_unnamed3_1	108.6	107	intact	Salmon_SSU5
NZ_CP082016.1	KP18-238	KP18-238_pla_pKP18-238-2_1	107.7	106.1	intact	Klebsi_phiKO2
NZ_CP083039.1	4906.28	4906.28_pla_p3-4906.28_1	46	45.3	intact	Klebsi_phiKO2
NZ_CP098153.1	Z0117KP0018	Z0117KP0018_pla_pZ0117KP0018-2_1	110.9	109.2	intact	Salmon_SSU5
NZ_CP015755.1	W14	W14_pla_unnamed2_1	109.3	107.7	intact	Salmon_SSU5
NZ_CP045018.1	BK13048	BK13048_pla_pBK13048-3_1	51.9	51.1	intact	Klebsi_phiKO2
NZ_CP083035.1	5208.51	5208.51_pla_p3-5208.51_1	109	107.3	intact	Salmon_SSU5
NZ_AP023151.1	SMKP03	SMKP03_pla_pSMKP03S_1	54.5	53.7	intact	Klebsi_phiKO2
NZ_CP061398.1	NU-CRE193	NU-CRE193_pla_pCRE-193-2_1	121.5	119.6	intact	Salmon_SSU5
NZ_CP113175.1	TSYCC10-2	TSYCC10-2_pla_pTSYCC10-2_3_1	121	119.1	intact	Salmon_SSU5
NZ_CP081867.1	K5880C	K5880C_pla_pK5880C-NR_1	117.7	115.8	intact	Salmon_SSU5
NZ_CP075317.1	DD521	DD521_pla_pDD521.1_1	114	112.1	intact	Salmon_SSU5
NZ_CP056224.1	RHBSTW-00973	RHBSTW-00973_pla_pRHBSTW-00973_3_1	111.7	109.8	intact	Salmon_SSU5
NZ_CP102393.1	K64	K64_pla_pRM-3_1	113.6	111.7	intact	Salmon_SSU5
NZ_CP056303.1	RHBSTW-00843	RHBSTW-00843_pla_pRHBSTW-00843_3_1	108.6	106.7	intact	Salmon_SSU5
NZ_CP021714.1	AR_0129	AR_0129_pla_tig00000001_1	106.5	104.7	intact	Salmon_SSU5
NZ_CP041101.1	KPCTRSRTH07	KPCTRSRTH07_pla_unnamed2_1	111.3	109.4	intact	Salmon_SSU5
NZ_CP054987.1	STIN_90	STIN_90_pla_unnamed3_1	110.1	108.2	intact	Salmon_SSU5
NZ_CP092756.1	bat17	bat17_pla_unnamed3_1	107.8	105.9	intact	Salmon_SSU5
NZ_CP092762.1	bat16	bat16_pla_unnamed3_1	107.8	105.9	intact	Salmon_SSU5
NZ_CP092768.1	bat15	bat15_pla_unnamed3_1	107.8	105.9	intact	Salmon_SSU5
NZ_CP089018.1	53374	53374_pla_p53374-110.4_1	110.4	108.5	intact	Salmon_SSU5
NZ_CP018314.1	Kp_Goe_822579	Kp_Goe_822579_pla_pKp_Goe_579-6_1	68.6	67.4	intact	Klebsi_phiKO2
NZ_CP092399.1	NC-01	NC-01_pla_Kp27-unnamed3_1	109.3	107.4	intact	Salmon_SSU5
NZ_LR890237.1	INF334-sc-2280143	INF334-sc-2280143_pla_3_1	112.1	110.1	intact	Salmon_SSU5
NZ_CP054975.1	STIN_93	STIN_93_pla_unnamed3_1	109.9	108	intact	Salmon_SSU5
NZ_CP092338.1	KPN20	KPN20_pla_pKPN20-2_1	108	106.1	intact	Salmon_SSU5
NZ_CP075258.1	SZP4-9-2	SZP4-9-2_pla_pSZP4-9-2-109k_1	109.7	107.7	intact	Salmon_SSU5
NZ_CP082006.1	KP18-8	KP18-8_pla_pKP18-8-3_1	110.2	108.2	intact	Salmon_SSU5
NZ_CP082792.1	KP4823	KP4823_pla_pKP4823_2_1	106.9	105	intact	Salmon_SSU5
NZ_CP035909.1	BA4656	BA4656_pla_unnamed2_1	109	107	intact	Salmon_SSU5
NZ_CP056436.1	RHBSTW-00510	RHBSTW-00510_pla_pRHBSTW-00510_5_1	107	105.1	intact	Salmon_SSU5
NZ_LN824139.1	MS6671	MS6671_pla_1_1	55.4	54.4	intact	Klebsi_phiKO2
NZ_CP058547.1	S161-2	S161-2_pla_pS161-2.3_1	136.7	134.2	intact	Salmon_SSU5
NZ_LR025094.1	KP9201	KP9201_pla_4_1	55.4	54.3	intact	Klebsi_phiKO2
NZ_CP027801.1	VH1-2	VH1-2_pla_pVH1-2-1_1	108	105.8	intact	Salmon_SSU5
NZ_CP085480.1	Kp1604	Kp1604_pla_p2_1	109.3	107	intact	Salmon_SSU5
NZ_CP103584.1	1498	1498_pla_pMB7868_2_1	111.6	109.2	intact	Salmon_SSU5
NZ_OW970533.1	147	14711_pla_P3_1	54.4	53.2	intact	Klebsi_phiKO2
NZ_CP044034.1	FDAARGOS_631	FDAARGOS_631_pla_unnamed2_1	114.7	112.1	intact	Salmon_SSU5
NZ_CP061057.1	HKP0067	HKP0067_pla_pHKP0067.4_1	57.5	56.1	intact	Klebsi_phiKO2
NZ_CP061066.1	HKP0018	HKP0018_pla_pHKP0018.4_1	57.5	56.1	intact	Klebsi_phiKO2
NZ_CP026146.1	F132	F132_pla_pF132_1_1	113.3	110.6	intact	Salmon_SSU5
NZ_CP027864.1	CRKP18622	CRKP18622_pla_pCRKP18622-1_1	108	105.4	intact	Salmon_SSU5
NZ_CP023421.1	1050	1050_pla_unnamed_1	53.1	51.8	intact	Klebsi_phiKO2
NZ_CP011576.1	CAV1392	CAV1392_pla_pCAV1392-50_1	49.8	48.6	intact	Escher_RCS47
NZ_CP101779.1	hvKP340	hvKP340_pla_unnamed3_1	55.2	53.8	intact	Klebsi_phiKO2
NZ_CP097672.1	IR5077_1	IR5077_1_pla_unnamed2_1	110.2	107.3	intact	Salmon_SSU5
NZ_CP095237.1	21072329	21072329_pla_p21072329_3_1	40.5	39.4	intact	Salmon_SEN34
NZ_CP100516.1	LH35-d	LH35-d_pla_pLH35-d-A_1	54.3	52.8	intact	Klebsi_phiKO2
NZ_OW970544.1	147	14712_pla_P4_1	54.4	52.9	intact	Klebsi_phiKO2
NZ_OW970361.1	147	1471_pla_P4_1	54.4	52.9	intact	Klebsi_phiKO2
NZ_OW970489.1	147	1478_pla_P3_1	54.4	52.9	intact	Klebsi_phiKO2
NZ_CP036194.1	BA34918	BA34918_pla_pIncFIB_1	109	105.9	intact	Salmon_SSU5
NZ_CP053366.1	BA2275	BA2275_pla_p2_1	40.4	39.3	intact	Salmon_SEN34
NZ_CP034049.1	KP_NORM_BLD_2014_104014	KP_NORM_BLD_2014_104014_pla_unnamed4_1	54.9	53.3	intact	Klebsi_phiKO2
NZ_CP015504.1	SKGH01	SKGH01_pla_unnamed4_1	56.2	54.6	intact	Klebsi_phiKO2
NZ_CP028997.1	AR_0079	AR_0079_pla_unnamed4_1	109.9	106.7	intact	Salmon_SSU5
NZ_OW970456.1	147	1476_pla_P4_1	54.4	52.8	intact	Klebsi_phiKO2
NZ_OW970480.1	147	1477_pla_P2_1	54.4	52.8	intact	Klebsi_phiKO2
NZ_OW970516.1	147	14710_pla_P2_1	54.4	52.8	intact	Klebsi_phiKO2
NZ_OW970369.1	147	1472_pla_P4_1	54	52.4	intact	Klebsi_phiKO2
NZ_CP056857.1	RHBSTW-00113	RHBSTW-00113_pla_pRHBSTW-00113_4_1	55.7	54	intact	Klebsi_phiKO2
NZ_LR890558.1	INF302-sc-2280090	INF302-sc-2280090_pla_3_1	53.8	52.1	intact	Klebsi_phiKO2
NZ_CP090470.1	kp7450	kp7450_pla_p2_1	129.3	125.2	intact	Salmon_SSU5
NZ_CP041929.1	18-2374	18-2374_pla_pSECR18-2374B_1	110.6	107.1	intact	Salmon_SSU5
NZ_LR890521.1	INF281-sc-2280206	INF281-sc-2280206_pla_7_1	53.9	52.2	intact	Klebsi_phiKO2
NZ_CP087648.1	DD01754	DD01754_pla_pDD01754-3_1	56.4	54.5	intact	Klebsi_phiKO2
NZ_LR890293.1	KSB1_1B	KSB1_1B_pla_3_1	113.7	109.9	intact	Salmon_SSU5
NZ_CP028794.1	WCHKP040035	WCHKP040035_pla_p1_040035_1	54.8	52.9	intact	Klebsi_phiKO2
NZ_CP079133.1	WRC04_AI1235MC	WRC04_AI1235MC_pla_pAI1235M_P2_1	111.6	107.6	intact	Salmon_SSU5
NZ_CP014758.1	AATZP	AATZP_pla_pKPN-041_1	38.4	37	intact	Salmon_SJ46
NZ_CP070901.1	JNQH116	JNQH116_pla_pJNQH116-3_1	21.4	20.6	intact	Escher_SH2026Stx1
NZ_LR025090.1	KP980	KP980_pla_4_1	53.3	51.3	intact	Klebsi_phiKO2
NZ_CP097699.1	IR12183_1	IR12183_1_pla_unnamed2_1	113.1	108.9	intact	Salmon_SSU5
NZ_LR134218.1	NCTC10317	NCTC10317_pla_2_1	107.9	103.8	intact	Salmon_SSU5
NZ_CP095258.1	21080937	21080937_pla_p21080937_5_1	26.5	25.5	intact	Entero_Arya
NZ_CP063217.1	HKU57	HKU57_pla_pHKU57_2_1	111.3	106.7	intact	Salmon_SSU5
NZ_OW970425.1	147	1474_pla_P3_1	56	53.6	intact	Klebsi_phiKO2
NZ_CP044046.1	FDAARGOS_629	FDAARGOS_629_pla_unnamed4_1	109.9	105.3	intact	Salmon_SSU5
NZ_CP101792.1	hvKP859	hvKP859_pla_unnamed2_1	111.6	106.6	intact	Salmon_SSU5
NZ_CP030728.1	B3	B3_pla_pKpnB3_1_1	69.9	66.7	intact	Klebsi_phiKO2
NZ_CP095244.1	21080237	21080237_pla_p21080237_4_1	41.7	39.7	intact	Entero_c_1
NZ_CP041953.1	KP2	KP2_pla_pKP2_7_1	55.1	52.4	intact	Klebsi_phiKO2
NZ_CP083028.1	6604.68	6604.68_pla_p2-6604.68_2	29.3	27.8	intact	Escher_RCS47
NZ_LR890506.1	KSB1_5H-sc-2280283	KSB1_5H-sc-2280283_pla_7_1	53.9	51	intact	Klebsi_phiKO2
NZ_CP031794.1	INF116-sc-2279924	INF116-sc-2279924_pla_unnamed2_1	53.8	50.8	intact	Klebsi_phiKO2
NZ_LR890486.1	KSB2_10B-sc-2280350	KSB2_10B-sc-2280350_pla_3_1	53.8	50.7	intact	Klebsi_phiKO2
NZ_OV049816.1	DJ	DJ_pla_DJ_-phage_N15_1	57.7	54.3	intact	Klebsi_phiKO2
NZ_CP019050.1	RJA166	RJA166_pla_pRJA166c_1	111.1	104.1	intact	Salmon_SSU5
NZ_CP022925.1	ST307PT01	ST307PT01_pla_pJYC01B_1	25.1	23.5	intact	Salmon_SEN34
NZ_CP076549.1	19PDR22	19PDR22_pla_p5_1	37.4	35	intact	Salmon_SEN34
NZ_CP095245.1	21080237	21080237_pla_p21080237_5_1	37.4	35	intact	Salmon_SEN34
NZ_CP095257.1	21080937	21080937_pla_p21080937_4_1	37.4	35	intact	Salmon_SEN34
NZ_CP021760.1	AR_0138	AR_0138_pla_tig00000003_1	54.4	50.8	intact	Klebsi_phiKO2
NZ_OW970557.1	147	14713_pla_P4_1	54.4	50.8	intact	Klebsi_phiKO2
NZ_CP100123.1	GZKP13	GZKP13_pla_pGZKP13-3_1	51.9	48.1	intact	Klebsi_phiKO2
NZ_CP059309.1	Kp46596	Kp46596_pla_pKp46596-3_1	35.9	33	intact	Escher_RCS47
NZ_LR890260.1	INF310-sc-2280104	INF310-sc-2280104_pla_7_1	53.9	49.5	intact	Klebsi_phiKO2
NZ_OW970564.1	147	14714_pla_P4_1	54.4	49.9	intact	Klebsi_phiKO2
NZ_LR890638.1	INF299-sc-2280084	INF299-sc-2280084_pla_7_1	53.9	49.4	intact	Klebsi_phiKO2
NZ_CP040729.1	KpvST147B_SE1_1_NDM	KpvST147B_SE1_1_NDM_pla_pKpvST147B_5_1	112.7	102.7	intact	Salmon_SSU5
NZ_CP008931.1	PMK1	PMK1_pla_pPMK1-B_1	111.7	101.6	intact	Salmon_SSU5
NZ_CP031578.1	N4b	N4b_pla_p1502320-1_1	60.5	54.7	intact	Salmon_SSU5
NZ_CP061971.1	IR5755	IR5755_pla_unnamed1_1	103.2	93.1	intact	Klebsi_phiKO2
